# Supplementary material for: Copper-catalyzed direct C–H arylselenation of 4-nitro-pyrazoles and other heterocycles with selenium powder and aryl iodides. Access to unsymmetrical heteroaryl selenides
Source: Royal Society of Chemistry journal article supplement (doi:10.1039/c9ra05004c), 2019-01-01
Supplement: c9ra05004c1.pdf [file c9ra05004c1.pdf]

# Copper-catalyzed direct C-H arylselenation of 4-nitro-pyrazoles and other heterocycles with selenium powder and aryl iodides. Access to unsymmetrical heteroaryl selenides.

Michał Jakubczyk,<sup>a</sup> Satenik Mkrtchyan,<sup>\*a</sup> Izabela D. Madura,<sup>b</sup> Paulina H. Marek,<sup>b,c</sup> and Viktor O. Iaroshenko.<sup>\*a</sup>

---

<sup>a</sup>Laboratory of Homogeneous Catalysis and Molecular Design at the Centre of Molecular and Macromolecular Studies, Polish Academy of Sciences, Sienkiewicza 112, PL-90-363 Łódź, Poland. E-mail: [iva108@gmail.com](mailto:iva108@gmail.com), [viktori@cbmm.lodz.pl](mailto:viktori@cbmm.lodz.pl)

<sup>b</sup>Department of Inorganic Chemistry, Faculty of Chemistry, Warsaw University of Technology. Noakowskiego 3, 00-664, Warsaw, Poland.

<sup>c</sup>University of Warsaw, Faculty of Chemistry, Pasteura 1, 02-093 Warsaw, Poland.

## Table of Contents

|                                                                                                                                                      |     |
|------------------------------------------------------------------------------------------------------------------------------------------------------|-----|
| (A) Experimental section.....                                                                                                                        | 3   |
| (B) Characterization of products.....                                                                                                                | 5   |
| (C) Copies <sup>1</sup> H and <sup>13</sup> C NMR spectra.....                                                                                       | 30  |
| (D) X-ray single crystal analysis of compounds <b>1c</b> , <b>2f</b> , <b>5b</b> , <b>5d</b> , <b>5f</b> , <b>5i</b> , <b>5k</b> and <b>5m</b> ..... | 145 |

## (A) Experimental section.

Known starting materials: 1-[(4-methylphenyl)methyl]-4-nitro-1*H*-pyrazole (**sm1**), 4-nitro-1-phenethyl-1*H*-pyrazole (**sm2**), 4-nitro-1-butyl-1*H*-pyrazole (**sm4**), 3-methyl-1-phenyl-1*H*-pyrazol-5-amine (**sm5**), 4-nitro-1-phenethyl-1*H*-imidazole (**sm7**), 2-methyl-4-nitro-1-phenethyl-1*H*-imidazole (**sm9**), 1-[(4-methylphenyl)methyl]-1*H*-benzimidazole (**sm10**), 1-phenethyl-1*H*-1,2,4-triazole (**sm11**), 4*H*-chromen-4-one (**sm12**), 1-(2-iodobenzyl)-1*H*-benzo[*d*]imidazole (**sm15**) - were prepared according to literature procedures.<sup>1-7</sup> Triazole **sm9** was obtained as a 1 : 8.5 molar ratio mixture of 4*H*- and 1*H*- 1,2,4-triazole *N*-alkylation products, respectively. However, only the 1*H*-isomer underwent the selenylation giving the expected C(5)-substituted product after chromatographic separation from impurities and both starting materials (**Table 4**, Entry 46). Starting materials **sm3**, **sm6**, **sm8**, **sm13** and **sm14** (**Scheme 1**) were prepared according to the general procedure described below. Commercially available reagents, catalysts and anhydrous and degassed solvents were used without further purification. Flash column chromatography was performed with Merck silica gel 60 (230-400 mesh). The solvents for column chromatography were distilled before use. Thin layer chromatography was carried out using Merck TLC Silica gel 60 F254 and visualized by short-wavelength ultraviolet light or by treatment with iodine or potassium permanganate (KMnO<sub>4</sub>) stain. Melting points are uncorrected. <sup>1</sup>H, <sup>13</sup>C and <sup>19</sup>F NMR spectra were recorded on a Bruker 200 and 500 MHz at 20°C. All <sup>1</sup>H NMR spectra are reported in parts per million (ppm) downfield of TMS and were measured relative to the signals for CHCl<sub>3</sub> (7.26 ppm) and DMSO (2.50 ppm). All <sup>13</sup>C NMR spectra were reported in ppm relative to residual CHCl<sub>3</sub> (77.00 ppm) or DMSO (39.70 ppm) and were obtained with <sup>1</sup>H decoupling. Coupling constants, *J*, are reported in Hertz (Hz). Gas chromatographic analyses was performed on Gas Chromatograph Mass Spectrometer GCMS-QP2010 Ultra instrument. Isolation of obtained compounds was achieved by column chromatography on Silica gel.

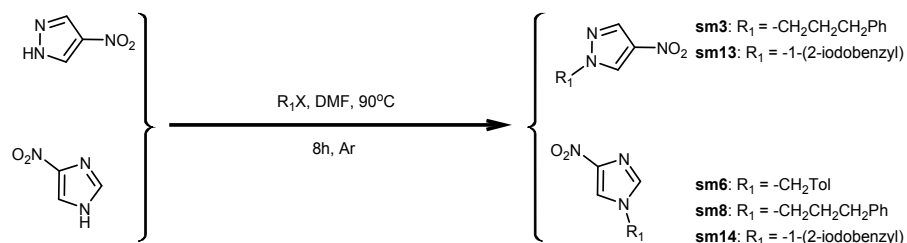

**Scheme 1:** Preparation of previously unknown starting materials.

**General procedure for the *N*-alkylation of pyrazol and imidazole derivatives** (starting materials **sm3**, **sm6**, **sm8**, **sm13**, **sm14**): Corresponding 4-nitro-1*H*-pyrazole (1eq.) and K<sub>2</sub>CO<sub>3</sub> (2.3eq.) successively were weighed to air and placed in a Schlenk flask, equipped with a magnetic stir bar, which then was capped with a rubber septum. The reaction

vessel was evacuated and backfilled with argon. The DMF (8mL for 1g of 4-nitro-1*H*-pyrazole) and corresponding alkyl bromide (1.3eq.) were added via a syringe, and the reaction was heated to 90 °C for 8 h. Upon completion, the reaction was cooled to room temperature and concentrated under vacuum. The crude mass was washed with water, which was extracted with chloroform afterward. Finally, the organic phase was dried (Na<sub>2</sub>SO<sub>4</sub>), filtered, and evaporated to dryness, or (if necessary) the residue was purified by column chromatography typically using hexane/ethyl acetate mixtures to provide the desired alkylated product.

**General procedure for the synthesis of diorganyl selenides (compounds 1a-1i, 2a-2f, 3a-3c, 4a-4d, 5a-5m, 6, 7a-7d, 8, 9a, 9b, 10a, 10b, 11, 12a, 12b):** An Ace Glass Pressure Tube was equipped with a suitable stirring pellet and loaded with 250mg (1.15mmol, 1eq.) of 1-[(4-methylphenyl)methyl]-4-nitro-1*H*-pyrazole, 502mg (2.30mmol, 2eq.) of 3-iodotoluene, 273mg (3.45mmol, 3.5eq.) of selenium (100 mesh), 26mg (0.11mmol, 0.1eq.) of CuBr<sub>2</sub> and 636mg (4.60mmol, 4eq.) of K<sub>2</sub>CO<sub>3</sub>. 1mL of dry DMSO was added and the tube was carefully closed with an original Ace Glass Tube (Teflon) plug. The vessel was placed in an aluminium heating-block on a hotplate. The reaction was kept in 115°C for 24h. After cooling down - the pressure tube was carefully opened under venting hood and the mixture was washed to a flask with MeOH. The volatiles were removed using a rotary evaporator and DMSO was removed by heating to about 60 °C under vacuum (oil vacuum pump). The solid crude mixture was purified by column chromatography typically using hexane/ethyl acetate gradient to provide the desired selenide.

**General procedure for the synthesis of benzoselenazines (compounds 13a, 13b and 13c):** An Ace Glass Pressure Tube was equipped with a suitable stirring pellet and loaded with 360mg (1.07mmol, 1eq.) of 1-(2-iodobenzyl)-1*H*-benzo[*d*]imidazole (**sm15**), 196mg (2.47mmol, 2.3eq.) of selenium (100 mesh), 24mg (0.10mmol, 0.1eq.) of CuBr<sub>2</sub> and 596mg (4.30mmol, 4eq.) of K<sub>2</sub>CO<sub>3</sub>. 1mL of dry DMSO was added and the tube was carefully closed with an original Ace Glass Tube (Teflon) plug. The vessel was placed in an aluminium heating-block on a hotplate. The reaction was kept in 115 °C for 24h. After cooling down - the pressure tube was carefully opened under venting hood and the mixture was washed to a flask with MeOH. The volatiles were removed using a rotary evaporator and DMSO was removed by heating to about 60 °C under vacuum (oil vacuum pump). The solid crude mixture was purified by column chromatography typically using hexane/ethyl acetate gradient to provide the desired benzoselenazine.

## (B) Characterization of products.

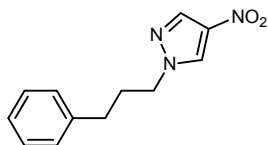

**4-nitro-1-(3-phenylpropyl)-1H-pyrazole (sm3):** white powder, mp. 55-56 °C,  $^1\text{H}$  NMR (500 MHz,  $\text{CDCl}_3$ ):  $\delta$  (ppm): 8.08 (s, 2H, C(3) and C(5)-pyrazole), 7.31 (t, 2H,  $^3J = 7.4$  Hz,  $\text{CH}_{\text{Ar}}$ ), 7.22 (t, 1H,  $^3J = 7.4$  Hz,  $\text{CH}_{\text{Ar}}$ ), 7.17 (d, 2H,  $^3J = 7.0$  Hz,  $\text{CH}_{\text{Ar}}$ ), 4.14 (t, 2H,  $^3J = 7.1$  Hz,  $\text{CH}_2$ ), 2.65 (t, 2H,  $^3J = 7.5$  Hz,  $\text{CH}_2$ ), 2.33 - 2.18 (m, 2H,  $\text{CH}_2$ ),  $^{13}\text{C}$  NMR (126 MHz,  $\text{CDCl}_3$ ):  $\delta$  (ppm): 139.98, 135.94, 128.80, 128.56, 128.47, 126.58, 52.72, 32.47, 31.08, MS (GC, 70 eV):  $m/z = 231$  ( $\text{M}^+$ , 19%), 126 (29), 118 (100), 91 (31), 65 (12), HRMS (TOF MS ES+): calcd for  $\text{C}_{12}\text{H}_{14}\text{N}_3\text{O}_2$  ( $\text{M} + \text{H}$ ) $^+$  232.1086, found 232.1088.

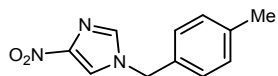

**1-[(4-methylphenyl)methyl]-4-nitro-1H-imidazole (sm6):** white powder, 103-104 °C,  $^1\text{H}$  NMR (500 MHz,  $\text{CDCl}_3$ ):  $\delta$  (ppm): 7.70 (s, 1H, C(2)-imidazole), 7.47 (s, 1H, C(5)-imidazole), 7.22 (d, 2H,  $^3J = 7.8$  Hz,  $\text{CH}_{\text{Ar}}$ ), 7.13 (d, 2H,  $^3J = 7.9$  Hz,  $\text{CH}_{\text{Ar}}$ ), 5.12 (s, 2H,  $\text{CH}_2$ ), 2.37 (s, 3H,  $\text{CH}_3$ ),  $^{13}\text{C}$  NMR (126 MHz,  $\text{CDCl}_3$ ):  $\delta$  (ppm): 139.55, 136.03, 130.65, 130.29, 128.12, 119.38, 52.17, 21.31, MS (GC, 70 eV):  $m/z = 217$  ( $\text{M}^+$ , 11%), 105 (100), 77 (13), HRMS (TOF MS ES+): calcd for  $\text{C}_{11}\text{H}_{11}\text{N}_3\text{O}_2\text{Na}$  ( $\text{M} + \text{Na}$ ) $^+$  240.0749, found 240.0754.

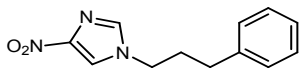

**4-nitro-1-(3-phenylpropyl)-1H-imidazole (sm8):** white powder, mp. 79-80 °C,  $^1\text{H}$  NMR (500 MHz,  $\text{CDCl}_3$ ):  $\delta$  (ppm): 7.75 (s, 1H, C(2)-imidazole), 7.40 (s, 1H, C(5)-imidazole), 7.32 (t, 2H,  $^3J = 7.5$  Hz,  $\text{CH}_{\text{Ar}}$ ), 7.24 (t, 1H,  $^3J = 7.4$  Hz,  $\text{CH}_{\text{Ar}}$ ), 7.15 (d, 2H,  $^3J = 7.2$  Hz,  $\text{CH}_{\text{Ar}}$ ), 4.01 (t, 2H,  $^3J = 7.2$  Hz,  $\text{CH}_2$ ), 2.67 (t, 2H,  $^3J = 7.4$  Hz,  $\text{CH}_2$ ), 2.21 (quint, 2H,  $^3J = 7.3$  Hz,  $\text{CH}_2$ ),  $^{13}\text{C}$  NMR (126 MHz,  $\text{CDCl}_3$ ):  $\delta$  (ppm): 139.36, 136.08, 128.96, 128.40, 126.84, 119.13, 47.57, 32.35, 31.88, MS (GC, 70 eV):  $m/z = 231$  ( $\text{M}^+$ , 29%), 127 (100), 118 (57), 91 (82), 77 (13), 65 (24), HRMS (TOF MS ES+): calcd for  $\text{C}_{12}\text{H}_{13}\text{N}_3\text{O}_2\text{Na}$  ( $\text{M} + \text{Na}$ ) $^+$  254.0905, found 254.0906.

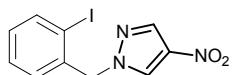

**1-(2-iodobenzyl)-4-nitro-1H-pyrazole (sm13):** light yellow crystals, mp. 100 °C,  $^1\text{H}$  NMR (500 MHz,  $\text{CDCl}_3$ ):  $\delta$  (ppm): 8.12 (s, 1H, C(3)-pyrazole), 8.11 (s, 1H, C(5)-pyrazole), 7.91 (dd, 1H,  $^3J = 7.9$  Hz,  $^4J = 1.0$  Hz,  $\text{CH}_{\text{Ar}}$ ), 7.39 (td, 1H,  $^3J = 7.6$  Hz,  $^4J = 1.1$  Hz,  $\text{CH}_{\text{Ar}}$ ), 7.23 (dd, 1H,  $^3J = 7.7$  Hz,  $^4J = 1.4$  Hz,  $\text{CH}_{\text{Ar}}$ ), 7.10 (td, 1H,  $^3J = 7.8$  Hz,  $^4J = 1.6$  Hz,  $\text{CH}_{\text{Ar}}$ ), 5.40 (s, 2H,  $\text{CH}_2$ ),  $^{13}\text{C}$  NMR (126 MHz,  $\text{CDCl}_3$ ):  $\delta$  (ppm): 140.29, 136.58, 136.23, 136.14, 130.98, 130.49, 129.26, 129.04, 99.40, 61.55, MS (GC, 70 eV):  $m/z = 217$  (2-iodobenzene- $\text{CH}_2^+$ , 14%), minus iodide 202 (100), 156 (35), 129 (10), 90 (43), HRMS (TOF MS ES+): calcd for  $\text{C}_{10}\text{H}_9\text{IN}_3\text{O}_2$  ( $\text{M} + \text{H}$ ) $^+$  329.9739, found 329.9742.

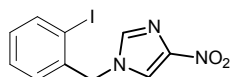

**1-(2-iodobenzyl)-4-nitro-1H-imidazole (sm14):** white powder, mp. 76-77 °C,  $^1\text{H}$  NMR (500 MHz,  $\text{CDCl}_3$ ):  $\delta$  (ppm): 7.84 - 7.80 (m, 1H,  $\text{CH}_{\text{Ar}}$ ), 7.73 (s, 1H, C(2)-imidazole), 7.51 (s, 1H, C(5)-imidazole), 7.36 - 7.30 (m, 1H,  $\text{CH}_{\text{Ar}}$ ), 7.19 (d, 1H,  $^3J = 6.5$  Hz,  $\text{CH}_{\text{Ar}}$ ), 7.06 - 7.01 (m, 1H,  $\text{CH}_{\text{Ar}}$ ), 5.23 (s, 2H,  $\text{CH}_2$ ),  $^{13}\text{C}$  NMR (126 MHz,  $\text{CDCl}_3$ ):  $\delta$  (ppm): 147.87, 140.22, 136.53, 136.21, 130.94, 130.02, 129.26, 119.69, 99.16, 56.34, MS (GC, 70 eV):  $m/z = 329$  ( $\text{M}^+$ , 22%), 217 (100), 202 (28), 156 (84), 90 (65), HRMS (TOF MS ES+): calcd for  $\text{C}_{10}\text{H}_8\text{IN}_3\text{O}_2$  ( $\text{M} + \text{H}$ ) $^+$  329.9739, found 329.9744.

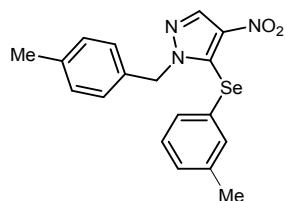

**1-[(4-methylphenyl)methyl]-5-[(3-methylphenyl)selenanyl]-4-nitro-1H-pyrazole (1a):** light yellow viscous oil,  $^1\text{H}$  NMR (500 MHz,  $\text{CDCl}_3$ ):  $\delta$  (ppm): 8.25 (s, 1H, C(3)-pyrazole), 7.19 - 7.03 (m, 8H,  $\text{CH}_{\text{Ar}}$ ), 5.41 (s, 2H,  $\text{CH}_2$ ), 2.33 (s, 3H,  $\text{CH}_3$ ), 2.24 (s, 3H,  $\text{CH}_3$ ),  $^{13}\text{C}$  NMR (126 MHz,  $\text{CDCl}_3$ ):  $\delta$  (ppm): 139.88, 138.21, 137.88, 137.47, 133.11, 132.15, 129.63, 129.61, 129.54, 129.52, 128.30, 127.80, 127.76, 55.40, 21.29, 21.20, MS (GC, 70 eV):  $m/z = 387$  ( $\text{M}^+$ , 5%), 280 (6), 222 (12), 195 (4), 105 (100), 91 (6), 77 (11), HRMS (TOF MS ES+): calcd for  $\text{C}_{18}\text{H}_{18}\text{N}_3\text{O}_2\text{Se}$  ( $\text{M} + \text{H}$ ) $^+$  388.0564, found 388.0566.

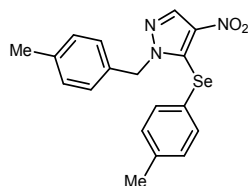

**1-[(4-methylphenyl)methyl]-5-[(4-methylphenyl)selanyl]-4-nitro-1H-pyrazole (1b):** white powder, mp. 55-56 °C,  $^1\text{H}$  NMR (500 MHz,  $\text{CDCl}_3$ ):  $\delta$  (ppm): 8.23 (s, 1H, C(3)-pyrazole), 7.26 (d, 2H,  $^3J = 8.1$  Hz,  $\text{CH}_{\text{Ar}}$ ), 7.11 (d, 2H,  $^3J = 8.0$  Hz,  $\text{CH}_{\text{Ar}}$ ), 7.04 (dd, 4H,  $^3J = 8.1$  Hz,  $^4J = 4.7$  Hz,  $\text{CH}_{\text{Ar}}$ ), 5.39 (s, 2H,  $\text{CH}_2$ ), 2.33 (s, 3H,  $\text{CH}_3$ ), 2.31 (s, 3H,  $\text{CH}_3$ ),  $^{13}\text{C}$  NMR (126 MHz,  $\text{CDCl}_3$ ):  $\delta$  (ppm): 139.12, 138.21, 137.73, 137.45, 133.08, 132.17, 130.65, 129.52, 128.78, 127.72, 124.25, 55.33, 21.21, MS (GC, 70 eV):  $m/z = 387$  ( $\text{M}^+$ , 5%), 280 (7), 195 (3), 119 (2), 105 (100), 91 (6), 77 (12), HRMS (TOF MS ES+): calcd for  $\text{C}_{18}\text{H}_{18}\text{N}_3\text{O}_2\text{Se}$  ( $\text{M} + \text{H}$ ) $^+$  388.0564, found 388.0562.

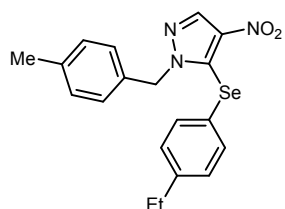

**1-[(4-methylphenyl)methyl]-5-[(4-ethylphenyl)selanyl]-4-nitro-1H-pyrazole (1c):** yellow powder, mp. 58 °C,  $^1\text{H}$  NMR (500 MHz,  $\text{CDCl}_3$ ):  $\delta$  (ppm): 8.24 (s, 1H, C(3)-pyrazole), 7.29 (d, 2H,  $^3J = 8.2$  Hz,  $\text{CH}_{\text{Ar}}$ ), 7.10 (d, 2H,  $^3J = 8.0$  Hz,  $\text{CH}_{\text{Ar}}$ ), 7.07 (d, 2H,  $^3J = 8.1$  Hz,  $\text{CH}_{\text{Ar}}$ ), 7.04 (d, 2H,  $^3J = 8.0$  Hz,  $\text{CH}_{\text{Ar}}$ ), 5.41 (s, 2H,  $\text{CH}_2$ ), 2.61 (q, 2H,  $^3J = 7.6$  Hz,  $\text{CH}_2$ ), 2.33 (s, 3H,  $\text{CH}_3$ ), 1.21 (t, 3H,  $^3J = 7.6$  Hz,  $\text{CH}_3$ ),  $^{13}\text{C}$  NMR (126 MHz,  $\text{CDCl}_3$ ):  $\delta$  (ppm): 145.36, 138.18, 137.75, 137.45, 133.15, 132.16, 129.51, 129.47, 128.73, 127.72, 124.47, 55.30, 28.54, 21.21, 15.39, MS (GC, 70 eV):  $m/z = 401$  ( $\text{M}^+$ , 5%), 280 (8), 209 (3), 105 (100), 77 (11), HRMS (TOF MS ES+): calcd for  $\text{C}_{19}\text{H}_{20}\text{N}_3\text{O}_2\text{Se}$  ( $\text{M} + \text{H}$ ) $^+$  402.0721, found 402.0721.

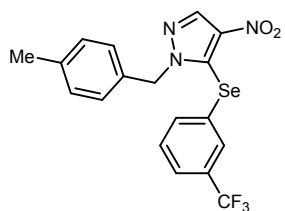

**1-[[4-methylphenyl)methyl]-5-[[3-(trifluoromethyl)phenyl]selanyl]-4-nitro-1H-pyrazole (1d)**: light yellow powder, mp. 68-70 °C,  $^1\text{H}$  NMR (500 MHz,  $\text{CDCl}_3$ ):  $\delta$  (ppm): 8.28 (s, 1H, C(3)-pyrazole), 7.50 (d, 1H,  $^3J = 7.8$  Hz,  $\text{CH}_{\text{Ar}}$ ), 7.45 - 7.40 (m, 2H,  $\text{CH}_{\text{Ar}}$ ), 7.31 (t, 1H,  $^3J = 8.0$  Hz,  $\text{CH}_{\text{Ar}}$ ), 7.07 (q, 4H,  $^3J = 8.3$  Hz,  $\text{CH}_{\text{Ar}}$ ), 5.51 (s, 2H,  $\text{CH}_2$ ), 2.30 (s, 3H,  $\text{CH}_3$ ),  $^{13}\text{C}$  NMR (126 MHz,  $\text{CDCl}_3$ ):  $\delta$  (ppm): 138.56, 138.28, 137.63, 135.44, 131.99 (q,  $^2J_{\text{CF}} = 32.7$  Hz,  $\text{C}_{\text{ipso}}\text{-CF}_3$ ), 131.85, 130.11, 129.68, 129.35, 128.64 (dd,  $J_{\text{CF}} = 7.5$  Hz,  $J_{\text{CF}} = 3.7$  Hz), 127.63, 126.66, 125.32 (dd,  $J_{\text{CF}} = 6.9$  Hz,  $J_{\text{CF}} = 3.3$  Hz), 123.34 (q,  $^1J_{\text{CF}} = 273.0$  Hz,  $\text{CF}_3$ ), 55.87, 21.16,  $^{19}\text{F}\{^1\text{H}\}$  NMR (188.34 MHz,  $\text{CDCl}_3$ ):  $\delta$  (ppm): -62.15 ( $\text{CF}_3$ ), MS (GC, 70 eV):  $m/z = 441$  ( $\text{M}^+$ , 5%), 280 (3), 105 (100), 77 (10), HRMS (TOF MS ES+): calcd for  $\text{C}_{18}\text{H}_{15}\text{F}_3\text{N}_3\text{O}_2\text{Se}$  ( $\text{M} + \text{H}$ ) $^+$  442.0282, found 442.0277.

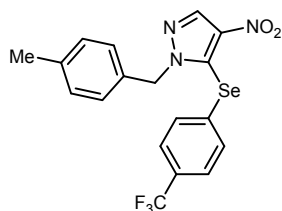

**1-[[4-methylphenyl)methyl]-5-[[4-(trifluoromethyl)phenyl]selanyl]-4-nitro-1H-pyrazole (1e)**: white powder, mp. 75-76 °C,  $^1\text{H}$  NMR (500 MHz,  $\text{CDCl}_3$ ):  $\delta$  (ppm): 8.30 (s, 1H, C(3)-pyrazole), 7.40 (d, 2H,  $^3J = 8.2$  Hz,  $\text{CH}_{\text{Ar}}$ ), 7.27 - 7.24 (m, 2H,  $\text{CH}_{\text{Ar}}$ ), 7.03 (q, 4H,  $^3J = 8.2$  Hz,  $\text{CH}_{\text{Ar}}$ ), 5.49 (s, 2H,  $\text{CH}_2$ ), 2.29 (s, 3H,  $\text{CH}_3$ ),  $^{13}\text{C}$  NMR (126 MHz,  $\text{CDCl}_3$ ):  $\delta$  (ppm):  $\delta$  138.59, 138.53, 137.69, 133.4 (d,  $^2J_{\text{CF}} = 11.8$  Hz,  $\text{C}_{\text{ipso}}\text{-CF}_3$ ), 131.97, 131.82, 131.34, 129.66, 127.73, 126.52 (dd,  $J_{\text{CF}} = 7.1$  Hz,  $J_{\text{CF}} = 3.3$  Hz), 126.23, 125.08 (q,  $^1J_{\text{CF}} = 288.3$  Hz,  $\text{CF}_3$ ), 55.89, 21.19,  $^{19}\text{F}\{^1\text{H}\}$  NMR (188.34 MHz,  $\text{CDCl}_3$ ):  $\delta$  (ppm): -62.20 ( $\text{CF}_3$ ), MS (GC, 70 eV):  $m/z = 441$  ( $\text{M}^+$ , 7%), 280 (6), 105 (100), 77 (13), HRMS (TOF MS ES+): calcd for  $\text{C}_{18}\text{H}_{14}\text{F}_3\text{N}_3\text{O}_2\text{SeNa}$  ( $\text{M} + \text{Na}$ ) $^+$  464.0101, found 464.0104.

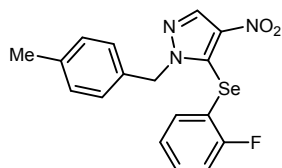

**1-[[4-methylphenyl)methyl]-5-[[2-fluorophenyl]selanyl]-4-nitro-1H-pyrazole (1f)**: light yellow powder, mp. 63-65 °C,  $^1\text{H}$  NMR (500 MHz,  $\text{CDCl}_3$ ):  $\delta$  (ppm): 8.25 (s, 1H, C(3)-pyrazole), 7.33 - 7.23 (m, 2H,  $\text{CH}_{\text{Ar}}$ ), 7.13 - 6.99 (m, 6H,  $\text{CH}_{\text{Ar}}$ ), 5.51 (s, 2H,  $\text{CH}_2$ ), 2.32 (s, 3H,  $\text{CH}_3$ ),  $^{13}\text{C}$  NMR (126 MHz,  $\text{CDCl}_3$ ):  $\delta$  (ppm): 161.10 (d,  $^1J_{\text{CF}} = 245.3$  Hz,  $\text{C}_{\text{ipso}}\text{-F}$ ), 138.34, 138.25, 137.52, 134.11 (d,  $J = 1.6$  Hz), 132.06, 130.91 (d,  $J_{\text{CF}} = 7.8$  Hz), 129.59, 127.82, 126.33 (d,  $J = 1.7$  Hz), 125.43 (d,  $J_{\text{CF}} = 3.3$  Hz), 116.12 (d,  $^2J_{\text{CF}} = 22.6$  Hz), 115.07 (d,  $^2J_{\text{CF}} =$



21.4 Hz), 55.57, 21.20,  $^{19}\text{F}\{^1\text{H}\}$  NMR (188.34 MHz,  $\text{CDCl}_3$ ):  $\delta$  (ppm): -103.00 (CF), MS (GC, 70 eV):  $m/z$  = 391 ( $\text{M}^+$ , 5%), 280 (5), 105 (100), 79 (12), 77 (11), HRMS (TOF MS ES+): calcd for  $\text{C}_{17}\text{H}_{15}\text{FN}_3\text{O}_2\text{Se}$  ( $\text{M} + \text{H}$ ) $^+$  392.0314, found 392.0317.

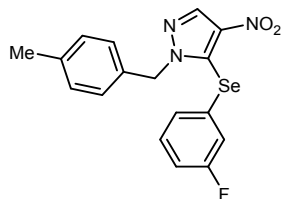

**1-[(4-methylphenyl)methyl]-5-[(3-fluorophenyl)selanyl]-4-nitro-1H-pyrazole (1g)**: yellow oil,  $^1\text{H}$  NMR (500 MHz,  $\text{CDCl}_3$ ):  $\delta$  (ppm): 8.27 (s, 1H, C(3)-pyrazole), 7.23 - 7.16 (m, 1H,  $\text{CH}_{\text{Ar}}$ ), 7.12 - 7.05 (m, 5H,  $\text{CH}_{\text{Ar}}$ ), 6.96 (td, 1H,  $^3J = 8.4$  Hz,  $^4J = 2.0$  Hz,  $\text{CH}_{\text{Ar}}$ ), 6.88 (dd, 1H,  $^3J = 8.4$  Hz,  $^5J = 1.3$  Hz,  $\text{CH}_{\text{Ar}}$ ), 5.47 (s, 2H,  $\text{CH}_2$ ), 2.32 (s, 3H,  $\text{CH}_3$ ),  $^{13}\text{C}$  NMR (126 MHz,  $\text{CDCl}_3$ ):  $\delta$  (ppm): 162.79 (d,  $^1J_{\text{CF}} = 251.4$  Hz,  $\text{C}_{\text{ipso-F}}$ ), 138.47, 138.19, 137.56, 131.96, 131.02 (d,  $J_{\text{CF}} = 8.1$  Hz), 129.74 (d,  $J_{\text{CF}} = 7.1$  Hz), 129.61, 127.74, 127.55 (d,  $J_{\text{CF}} = 3.1$  Hz), 126.91, 118.93 (d,  $^2J_{\text{CF}} = 23.2$  Hz), 115.61 (d,  $^2J_{\text{CF}} = 21.1$  Hz), 55.70, 21.18,  $^{19}\text{F}\{^1\text{H}\}$  NMR (188.34 MHz,  $\text{CDCl}_3$ ):  $\delta$  (ppm): -109.57 (CF), MS (GC, 70 eV):  $m/z$  = 391 ( $\text{M}^+$ , 6%), 280 (6), 105 (100), 79 (12), 77 (11), HRMS (TOF MS ES+): calcd for  $\text{C}_{17}\text{H}_{15}\text{FN}_3\text{O}_2\text{Se}$  ( $\text{M} + \text{H}$ ) $^+$  392.0314, found 392.0316.

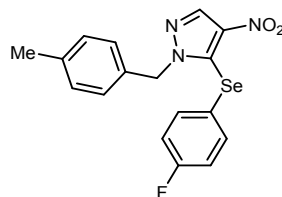

**1-[(4-methylphenyl)methyl]-5-[(4-fluorophenyl)selanyl]-4-nitro-1H-pyrazole (1h)**: light yellow oil,  $^1\text{H}$  NMR (500 MHz,  $\text{CDCl}_3$ ):  $\delta$  (ppm): 8.24 (s, 1H, C(3)-pyrazole), 7.35 - 7.29 (m, 2H,  $\text{CH}_{\text{Ar}}$ ), 7.1 (d, 2H,  $^3J = 8.0$  Hz,  $\text{CH}_{\text{Ar}}$ ), 7.0 (d, 2H,  $^3J = 8.0$  Hz,  $\text{CH}_{\text{Ar}}$ ), 6.95 - 6.88 (m, 2H,  $\text{CH}_{\text{Ar}}$ ), 5.46 (s, 2H,  $\text{CH}_2$ ), 2.33 (s, 3H,  $\text{CH}_3$ ),  $^{13}\text{C}$  NMR (126 MHz,  $\text{CDCl}_3$ ):  $\delta$  (ppm): 163.21 (d,  $^1J_{\text{CF}} = 250.0$  Hz,  $\text{C}_{\text{ipso-F}}$ ), 138.45, 137.86, 137.61, 135.41 (d,  $J_{\text{CF}} = 8.2$  Hz), 132.15, 129.67, 128.26, 127.65, 122.48 (d,  $J_{\text{CF}} = 3.3$  Hz), 117.10 (d,  $^2J_{\text{CF}} = 22.0$  Hz), 55.58, 21.26,  $^{19}\text{F}\{^1\text{H}\}$  NMR (188.34 MHz,  $\text{CDCl}_3$ ):  $\delta$  (ppm): -110.86 (CF), MS (GC, 70 eV):  $m/z$  = 391 ( $\text{M}^+$ , 5%), 280 (4), 105 (100), 77 (12), HRMS (TOF MS ES+): calcd for  $\text{C}_{17}\text{H}_{15}\text{FN}_3\text{O}_2\text{Se}$  ( $\text{M} + \text{H}$ ) $^+$  392.0314, found 392.0314.

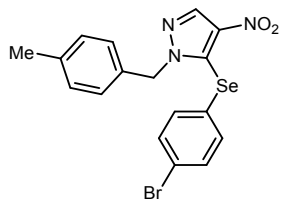

**1-[(4-methylphenyl)methyl]-5-[(4-bromophenyl)selenanyl]-4-nitro-1H-pyrazole (1i):** white powder, mp. 100-101 °C,  $^1\text{H}$  NMR (500 MHz,  $\text{CDCl}_3$ ):  $\delta$  (ppm): 8.32 (s, 1H, C(3)-pyrazole), 7.52 (d, 1H,  $^3J = 7.8$  Hz,  $\text{CH}_{\text{Ar}}$ ), 7.13 - 7.00 (m, 6H,  $\text{CH}_{\text{Ar}}$ ), 6.65 (d, 1H,  $^3J = 7.8$  Hz,  $\text{CH}_{\text{Ar}}$ ), 5.45 (s, 2H,  $\text{CH}_2$ ), 2.28 (s, 3H,  $\text{CH}_3$ ),  $^{13}\text{C}$  NMR (126 MHz,  $\text{CDCl}_3$ ):  $\delta$  (ppm): 138.90, 138.47, 137.70, 133.31, 132.22, 131.78, 130.39, 129.59, 128.85, 128.57, 128.12, 126.79, 123.28, 55.85, 21.24, MS (GC, 70 eV):  $m/z = 451$  ( $\text{M}^+$ , 5%), 280 (8), 105 (100), 79 (12), 77 (12), HRMS (TOF MS ES+): calcd for  $\text{C}_{17}\text{H}_{15}\text{BrN}_3\text{O}_2\text{Se}$  ( $\text{M} + \text{H}$ ) $^+$  451.9513, found 451.9510.

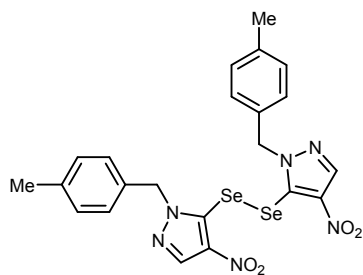

**Identification of byproduct 1,2-bis(1-(4-methylbenzyl)-4-nitro-1H-pyrazol-5-yl)diselane (1by):** colorless crystals, mp. 59-60 °C,  $^1\text{H}$  NMR (500 MHz,  $\text{CDCl}_3$ ):  $\delta$  (ppm): 8.22 (s, 2H, C(3)-pyrazole), 7.19 (d, 4H,  $^3J = 7.9$  Hz,  $\text{CH}_{\text{Ar}}$ ), 7.10 (d, 4H,  $^3J = 8.0$  Hz,  $\text{CH}_{\text{Ar}}$ ), 5.30 (s, 4H,  $\text{CH}_2$ ), 2.33 (s, 6H,  $\text{CH}_3$ ),  $^{13}\text{C}$  NMR (126 MHz,  $\text{CDCl}_3$ ):  $\delta$  (ppm): 138.76, 137.47, 131.82, 129.91, 127.75, 125.96, 56.01, 21.33, MS (GC, 70 eV):  $m/z = 592$  ( $\text{M}^+$ , 3%), 296 (37), 279 (11), 176 (7), 121 (26), 105 (100), 79 (17), 77 (17), HRMS (TOF MS ES+): calcd for  $\text{C}_{22}\text{H}_{21}\text{N}_6\text{O}_4\text{Se}_2$  ( $\text{M} + \text{H}$ ) $^+$  592.9955, found 592.9967.

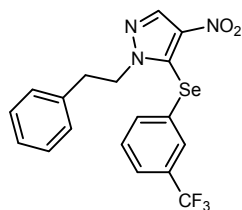

**5-(3-(trifluoromethyl)phenylselanyl)-4-nitro-1-phenethyl-1H-pyrazole (2a):** light yellow oil,  $^1\text{H}$  NMR (500 MHz,  $\text{CDCl}_3$ ):  $\delta$  (ppm): 8.31 (s, 1H, C(3)-pyrazole), 7.60 (s, 1H,  $\text{CH}_{\text{Ar}}$ ), 7.53 (d, 1H,  $^3J = 7.6$  Hz,  $\text{CH}_{\text{Ar}}$ ), 7.38 - 7.28 (m, 2H,  $\text{CH}_{\text{Ar}}$ ), 7.27 - 7.20 (m, 3H,  $\text{CH}_{\text{Ar}}$ ), 6.99 (dd, 2H,  $^3J = 7.4$  Hz,  $^4J = 1.9$  Hz,  $\text{CH}_{\text{Ar}}$ ), 4.58 (t, 2H,  $^3J = 7.1$  Hz,  $\text{CH}_2$ ), 3.13 (t, 2H,  $^3J = 7.1$  Hz,  $\text{CH}_2$ ),  $^{13}\text{C}$  NMR (126 MHz,  $\text{CDCl}_3$ ):  $\delta$  (ppm): 137.88, 137.54, 136.70, 135.01, 132.13 (q,  $^2J_{\text{CF}} = 33.0$  Hz,  $\text{C}_{\text{ipso-CF}_3}$ ), 130.32, 129.77, 128.98, 128.88, 128.34 (dd,  $J_{\text{CF}} = 7.5$  Hz,  $J_{\text{CF}} = 3.9$  Hz), 127.51, 127.39, 125.33 (q,  $J_{\text{CF}} = 3.6$  Hz), 123.41 (q,  $^1J_{\text{CF}} = 272.9$  Hz,  $\text{CF}_3$ ), 53.11, 36.37,  $^{19}\text{F}\{^1\text{H}\}$  NMR (188.34 MHz,  $\text{CDCl}_3$ ):  $\delta$  (ppm): -62.14 ( $\text{CF}_3$ ), MS (GC, 70 eV):  $m/z = 441$  ( $\text{M}^+$ , 7%), 337 (76), 230 (24), 176 (28), 104 (94), 91 (100), 77 (38), 65 (21), HRMS (TOF MS ES+): calcd for  $\text{C}_{18}\text{H}_{15}\text{F}_3\text{N}_3\text{O}_2\text{Se}$  ( $\text{M} + \text{H}$ ) $^+$  442.0282, found 442.0285.

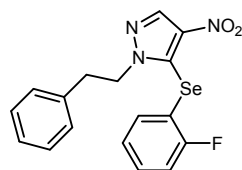

**5-(2-fluorophenylselanyl)-4-nitro-1-phenethyl-1H-pyrazole (2b):** light yellow oil,  $^1\text{H}$  NMR (500 MHz,  $\text{CDCl}_3$ ):  $\delta$  (ppm): 8.26 (s, 1H, C(3)-pyrazole), 7.35 - 7.20 (m, 5H,  $\text{CH}_{\text{Ar}}$ ), 7.10 - 6.99 (m, 4H,  $\text{CH}_{\text{Ar}}$ ), 4.61 (t, 2H,  $^3J = 7.2$  Hz,  $\text{CH}_2$ ), 3.12 (t, 2H,  $^3J = 7.2$  Hz,  $\text{CH}_2$ ),  $^{13}\text{C}$  NMR (126 MHz,  $\text{CDCl}_3$ ):  $\delta$  (ppm): 161.23 (d,  $^1J_{\text{CF}} = 245.3$  Hz,  $\text{C}_{\text{ipso-F}}$ ), 137.67, 137.60, 136.87, 134.41, 131.04 (d,  $J_{\text{CF}} = 7.8$  Hz), 128.92, 127.29, 127.04, 125.47 (d,  $J_{\text{CF}} = 3.3$  Hz), 116.13 (d,  $^2J_{\text{CF}} = 22.8$  Hz), 115.14 (d,  $^2J_{\text{CF}} = 21.4$  Hz), 53.04, 36.39,  $^{19}\text{F}\{^1\text{H}\}$  NMR (188.34 MHz,  $\text{CDCl}_3$ ):  $\delta$  (ppm): -103.01 (CF), MS (GC, 70 eV):  $m/z = 391$  ( $\text{M}^+$ , 10%), 287 (88), 176 (39), 109 (44), 104 (55), 91 (100), 77 (45), 65 (23), HRMS (TOF MS ES+): calcd for  $\text{C}_{17}\text{H}_{15}\text{FN}_3\text{O}_2\text{Se}$  ( $\text{M} + \text{H}$ ) $^+$  392.0314, found 392.0320.

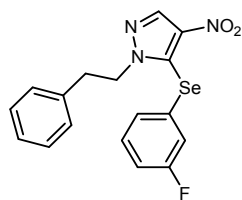

**5-(3-fluorophenylselanyl)-4-nitro-1-phenethyl-1H-pyrazole (2c):** light yellow oil,  $^1\text{H}$  NMR (500 MHz,  $\text{CDCl}_3$ ):  $\delta$  (ppm): 8.30 (s, 1H, C(3)-pyrazole), 7.35 - 7.16 (m, 4H,  $\text{CH}_{\text{Ar}}$ ), 7.08 - 6.90 (m, 5H,  $\text{CH}_{\text{Ar}}$ ), 4.56 (t, 2H,  $^3J = 7.2$  Hz,  $\text{CH}_2$ ), 3.13 (t, 2H,  $^3J = 7.2$  Hz,  $\text{CH}_2$ ),  $^{13}\text{C}$  NMR (126 MHz,  $\text{CDCl}_3$ ):  $\delta$  (ppm): 162.85 (d,  $^1J_{\text{CF}} = 251.5$  Hz,  $\text{C}_{\text{ipso-F}}$ ), 137.70, 137.49, 136.76, 131.13 (d,  $J_{\text{CF}} = 8.0$  Hz), 130.07 (d,  $J_{\text{CF}} = 7.0$  Hz), 128.89, 128.83, 127.63, 127.29, 127.26 (d,  $J_{\text{CF}} = 3.4$  Hz), 118.65 (d,  $^2J_{\text{CF}} = 23.1$  Hz), 115.60 (d,  $^2J_{\text{CF}} = 21.0$  Hz), 53.00, 36.24,  $^{19}\text{F}\{^1\text{H}\}$  NMR (188.34 MHz,  $\text{CDCl}_3$ ):  $\delta$  (ppm): -109.39 (CF), MS (GC, 70 eV):  $m/z = 391$  ( $\text{M}^+$ , 12%), 287 (80), 176 (36), 109 (36), 104 (60), 91 (100), 77 (41), 65 (21), HRMS (TOF MS ES+): calcd for  $\text{C}_{17}\text{H}_{15}\text{FN}_3\text{O}_2\text{Se}$  ( $\text{M} + \text{H}$ ) $^+$  392.0314, found 392.0319.

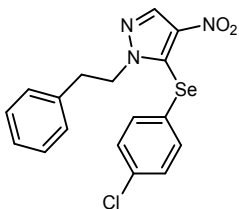

**5-(4-chlorophenylselanyl)-4-nitro-1-phenethyl-1H-pyrazole (2d):** yellow crystals, mp. 95 °C,  $^1\text{H}$  NMR (500 MHz,  $\text{CDCl}_3$ ):  $\delta$  (ppm): 8.27 (s, 1H, C(3)-pyrazole), 7.32 - 7.22 (m, 3H,  $\text{CH}_{\text{Ar}}$ ), 7.22 - 7.12 (m, 4H,  $\text{CH}_{\text{Ar}}$ ), 7.01 (dd, 2H,  $^3J = 7.3$  Hz,  $^4J = 2.0$  Hz,  $\text{CH}_{\text{Ar}}$ ), 4.55 (t, 2H,  $^3J = 7.1$  Hz,  $\text{CH}_2$ ), 3.13 (t, 2H,  $^3J = 7.1$  Hz,  $\text{CH}_2$ ),  $^{13}\text{C}$  NMR (126 MHz,  $\text{CDCl}_3$ ):  $\delta$  (ppm): 137.73, 137.32, 136.85, 135.03, 133.67, 130.06, 128.95, 128.90, 128.30, 127.30, 126.50, 52.97, 36.23, MS (GC, 70 eV):  $m/z = 407$  ( $\text{M}^+$ , 12%), 303 (60), 280 (15), 176 (40), 125 (23), 104 (48), 91 (100), 77 (51), 65 (23), HRMS (TOF MS ES+): calcd for  $\text{C}_{17}\text{H}_{15}\text{ClN}_3\text{O}_2\text{Se}$  ( $\text{M} + \text{H}$ ) $^+$  408.0018, found 408.0017.

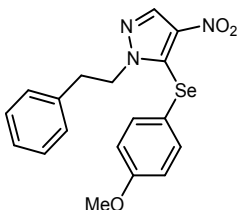

**5-(4-methoxyphenylselanyl)-4-nitro-1-phenethyl-1H-pyrazole (2e):** yellow viscous oil,  $^1\text{H}$  NMR (500 MHz,  $\text{CDCl}_3$ ):  $\delta$  (ppm): 8.22 (s, 1H, C(3)-pyrazole), 7.35 (d, 2H,  $^3J = 8.9$  Hz,  $\text{CH}_{\text{Ar}}$ ), 7.31 - 7.21 (m, 3H,  $\text{CH}_{\text{Ar}}$ ), 7.04 (d, 2H,  $^3J = 8.0$  Hz,  $\text{CH}_{\text{Ar}}$ ), 6.79 (d, 2H,  $^3J = 8.9$  Hz,  $\text{CH}_{\text{Ar}}$ ), 4.50 - 4.45 (m, 2H,  $\text{CH}_2$ ), 3.77 (s, 3H,  $\text{OCH}_3$ ), 3.11 - 3.03 (m, 2H,  $\text{CH}_2$ ),  $^{13}\text{C}$  NMR (126 MHz,  $\text{CDCl}_3$ ):  $\delta$  (ppm): 160.48, 137.40, 137.01, 136.97, 135.58, 129.76, 128.85, 128.84, 127.14, 117.73, 115.55, 55.43, 52.79, 36.11, MS (GC, 70 eV):  $m/z = 403$  ( $\text{M}^+$ , 29%), 299 (17), 280 (22), 123 (100), 105 (25), 91 (37), 77 (24), HRMS (TOF MS ES+): calcd for  $\text{C}_{18}\text{H}_{18}\text{N}_3\text{O}_3\text{Se}$  ( $\text{M} + \text{H}$ ) $^+$  404.0513, found 404.0521.

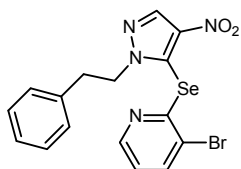

**2-(4-nitro-1-phenethyl-1H-pyrazol-5-ylselanyl)-3-bromopyridine (2f):** white powder, 120-121 °C,  $^1\text{H}$  NMR (500 MHz,  $\text{CDCl}_3$ ):  $\delta$  (ppm): 8.34 (s, 1H, C(3)-pyrazole), 8.13 (dd, 1H,  $^3J = 4.7$  Hz,  $^4J = 1.5$  Hz,  $\text{CH}_{\text{Ar}}$ ), 7.71 (dd, 1H,  $^3J = 7.9$  Hz,  $^4J = 1.5$  Hz,  $\text{CH}_{\text{Ar}}$ ), 7.29 - 7.18 (m, 3H,  $\text{CH}_{\text{Ar}}$ ), 7.08 - 7.03 (m, 2H,  $\text{CH}_{\text{Ar}}$ ), 6.97 (dd, 1H,  $^3J = 7.9$ ,  $^3J = 4.7$  Hz,  $\text{CH}_{\text{Ar}}$ ), 4.54 (t, 2H,  $^3J = 7.3$  Hz,  $\text{CH}_2$ ), 3.17 (t, 2H,  $^3J = 7.3$  Hz,  $\text{CH}_2$ ),  $^{13}\text{C}$  NMR (126 MHz,  $\text{CDCl}_3$ ):  $\delta$  (ppm): 154.85, 148.86, 139.71, 138.14, 137.60, 137.06, 128.93, 128.83, 127.18, 122.73, 120.59, 53.29, 36.52, MS (GC, 70 eV):  $m/z = 406$  (minus nitro,  $\text{M}^+$ , 100%), 355 (13), 302 (42), 287 (7), 236 (8), 195 (13), 156 (23), 104 (74), 91 (79), 77 (84), 65 (35), HRMS (TOF MS ES+): calcd for  $\text{C}_{16}\text{H}_{14}\text{BrN}_4\text{O}_2\text{Se}$  ( $\text{M} + \text{H}$ ) $^+$  452.9465, found 452.9467.

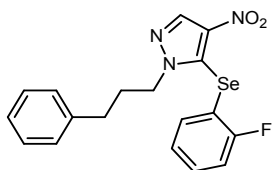

**5-(2-fluorophenylselanyl)-4-nitro-1-(3-phenylpropyl)-1H-pyrazole (3a):** yellow viscous oil,  $^1\text{H}$  NMR (500 MHz,  $\text{CDCl}_3$ ):  $\delta$  (ppm): 8.23 (s, 1H, C(3)-pyrazole), 7.35 - 7.27 (m, 4H,  $\text{CH}_{\text{Ar}}$ ), 7.21 (t, 1H,  $^3J = 7.4$  Hz,  $\text{CH}_{\text{Ar}}$ ), 7.14 - 7.06 (m, 4H,  $\text{CH}_{\text{Ar}}$ ), 4.31 (t, 2H,  $^3J = 7.3$  Hz,  $\text{CH}_2$ ), 2.60 (t, 2H,  $^3J = 7.7$  Hz,  $\text{CH}_2$ ), 2.14 (quint, 2H,  $^3J = 7.6$  Hz,  $\text{CH}_2$ ),  $^{13}\text{C}$  NMR (126 MHz,  $\text{CDCl}_3$ ):  $\delta$  (ppm): 161.19 (d,  $^1J_{\text{CF}} = 245.6$  Hz,  $\text{C}_{\text{ipso-F}}$ ), 140.28, 137.85, 137.25, 134.33, 131.12 (d,  $J_{\text{CF}} = 7.7$  Hz), 128.61, 128.35, 126.34, 126.31 (d,  $J_{\text{CF}} = 8.0$  Hz), 125.54 (d,  $J_{\text{CF}} = 3.4$  Hz), 116.22 (d,  $^2J_{\text{CF}} = 22.7$  Hz), 115.02 (d,  $^2J_{\text{CF}} = 21.5$  Hz), 51.48, 32.61, 31.15,  $^{19}\text{F}\{^1\text{H}\}$  NMR (188.34 MHz,  $\text{CDCl}_3$ ):  $\delta$  (ppm): -102.72 (CF), MS (GC, 70 eV):  $m/z = 405$  ( $\text{M}^+$ , 1%), 287 (5), 230 (100), 202 (12), 175 (9), 117 (48), 109 (35), 91 (76), 65 (17), HRMS (TOF MS ES+): calcd for  $\text{C}_{18}\text{H}_{17}\text{FN}_3\text{O}_2\text{Se}$  ( $\text{M} + \text{H}$ ) $^+$  406.0470, found 406.0474.

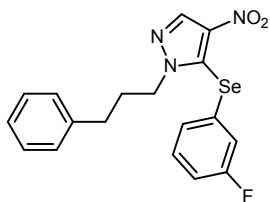

**5-(3-fluorophenylselanyl)-4-nitro-1-(3-phenylpropyl)-1H-pyrazole (3b):** yellow viscous oil,  $^1\text{H}$  NMR (500 MHz,  $\text{CDCl}_3$ ):  $\delta$  (ppm): 8.25 (s, 1H, C(3)-pyrazole), 7.36 - 7.26 (m, 4H,  $\text{CH}_{\text{Ar}}$ ), 7.19 - 7.14 (m, 3H,  $\text{CH}_{\text{Ar}}$ ), 7.11 - 7.04 (m, 2H,  $\text{CH}_{\text{Ar}}$ ), 4.23 (t, 2H,  $^3J = 7.4$  Hz,  $\text{CH}_2$ ), 2.58 (t, 2H,  $^3J = 7.5$  Hz,  $\text{CH}_2$ ), 2.11 (quint, 2H,  $^3J = 7.5$  Hz,  $\text{CH}_2$ ),  $^{13}\text{C}$  NMR (126 MHz,  $\text{CDCl}_3$ ):  $\delta$  (ppm): 162.94 (d,  $^1J_{\text{CF}} = 251.8$  Hz,  $\text{C}_{\text{ipso-F}}$ ), 140.19, 137.87, 137.37, 131.31 (d,  $J_{\text{CF}} = 8.0$  Hz), 129.89 (d,  $J_{\text{CF}} = 7.0$  Hz), 128.70, 128.41, 127.60 (d,  $J_{\text{CF}} = 3.2$  Hz), 126.82, 126.46, 119.01 (d,  $^2J_{\text{CF}} = 23.1$  Hz), 115.85 (d,  $^2J_{\text{CF}} = 21.1$  Hz), 51.52, 32.64, 31.22,  $^{19}\text{F}\{^1\text{H}\}$  NMR (188.34 MHz,  $\text{CDCl}_3$ ):  $\delta$  (ppm): -109.20 (CF), MS (GC, 70 eV):  $m/z = 405$  ( $\text{M}^+$ , 1%), 287 (4), 230 (100), 202 (10), 175 (7), 117 (45), 109 (21), 91 (61), 65 (14), HRMS (TOF MS ES+): calcd for  $\text{C}_{18}\text{H}_{17}\text{FN}_3\text{O}_2\text{Se}$  ( $\text{M} + \text{H}$ ) $^+$  406.0470, found 406.0472.

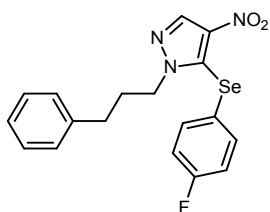

**5-(4-fluorophenylselanyl)-4-nitro-1-(3-phenylpropyl)-1H-pyrazole (3c):** yellow viscous oil,  $^1\text{H}$  NMR (500 MHz,  $\text{CDCl}_3$ ):  $\delta$  (ppm): 8.21 (s, 1H, C(3)-pyrazole), 7.41 - 7.38 (m, 2H,  $\text{CH}_{\text{Ar}}$ ), 7.30 (t, 2H,  $^3J = 7.5$  Hz,  $\text{CH}_{\text{Ar}}$ ), 7.22 (t, 1H,  $^3J = 7.4$  Hz,  $\text{CH}_{\text{Ar}}$ ), 7.13 (d, 2H,  $^3J = 7.2$  Hz,  $\text{CH}_{\text{Ar}}$ ), 6.97 (t, 2H,  $^3J = 8.6$  Hz,  $\text{CH}_{\text{Ar}}$ ), 4.22 (t, 2H,  $^3J = 7.5$  Hz,  $\text{CH}_2$ ), 2.59 (t, 2H,  $^3J = 7.5$  Hz,  $\text{CH}_2$ ), 2.10 (quint, 2H,  $^3J = 7.5$  Hz,  $\text{CH}_2$ ),  $^{13}\text{C}$  NMR (126 MHz,  $\text{CDCl}_3$ ):  $\delta$  (ppm): 163.02 (d,  $^1J_{\text{CF}} = 250.0$  Hz,  $\text{C}_{\text{ipso-F}}$ ), 140.18, 137.33, 137.08, 135.24 (d,  $J_{\text{CF}} = 8.2$  Hz), 128.54, 128.31, 127.83, 126.29, 122.51 (d,  $J_{\text{CF}} = 3.3$  Hz), 117.14 (d,  $^2J_{\text{CF}} = 22.0$  Hz), 51.27, 32.50, 31.04,  $^{19}\text{F}\{^1\text{H}\}$  NMR (188.34 MHz,  $\text{CDCl}_3$ ):  $\delta$  (ppm): -110.50 (CF), MS (GC, 70 eV):  $m/z = 405$  ( $\text{M}^+$ , 1%), 287 (4), 230 (100), 202 (10), 175 (6), 117 (42), 109 (42), 91 (57), 65 (13), HRMS (TOF MS ES+): calcd for  $\text{C}_{18}\text{H}_{17}\text{FN}_3\text{O}_2\text{Se}$  ( $\text{M} + \text{H}$ ) $^+$  406.0470, found 406.0473.

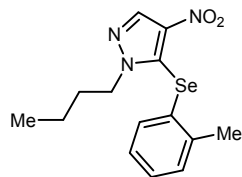

**5-(2-methylphenylselanyl)-1-butyl-4-nitro-1H-pyrazole (4a):** yellow viscous oil,  $^1\text{H}$  NMR (500 MHz,  $\text{CDCl}_3$ ):  $\delta$  (ppm): 8.23 (s, 1H, C(3)-pyrazole), 7.24 - 7.20 (m, 2H,  $\text{CH}_{\text{Ar}}$ ), 7.13 (d, 1H,  $^3J = 7.5$  Hz,  $\text{CH}_{\text{Ar}}$ ), 7.09 - 7.04 (m, 1H,  $\text{CH}_{\text{Ar}}$ ), 4.09 (t, 2H,  $^3J = 7.5$  Hz,  $\text{CH}_2$ ), 2.40 (s, 3H,  $\text{C}_{\text{Ar}}\text{-CH}_3$ ), 1.64 (quint, 2H,  $^3J = 7.5$  Hz,  $\text{CH}_2$ ), 1.19 (sext, 2H,  $^3J = 7.5$  Hz,  $\text{CH}_2$ ), 0.84 (t, 3H,  $^3J = 7.3$  Hz,  $\text{CH}_3$ ),  $^{13}\text{C}$  NMR (126 MHz,  $\text{CDCl}_3$ ):  $\delta$  (ppm): 139.34, 137.63, 137.19, 132.34, 131.05, 129.34, 128.87, 127.83, 127.45, 51.86, 31.75, 22.18, 19.72, 13.60, MS (GC, 70 eV):  $m/z = 339$  ( $\text{M}^+$ , 30%), 322 (9), 232 (100), 186 (15), 176 (25), 168 (58), 128 (10), 115 (17), 105 (63), 91 (96), 77 (18), 65 (31), 55 (26), 41 (45), HRMS (TOF MS ES $^+$ ): calcd for  $\text{C}_{14}\text{H}_{18}\text{N}_3\text{O}_2\text{Se}$  ( $\text{M} + \text{H}$ ) $^+$  340.0564, found 340.0568.

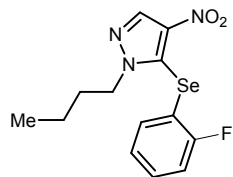

**5-(2-fluorophenylselanyl)-1-butyl-4-nitro-1H-pyrazole (4b):** yellow viscous oil,  $^1\text{H}$  NMR (500 MHz,  $\text{CDCl}_3$ ):  $\delta$  (ppm): 8.24 (s, 1H, C(3)-pyrazole), 7.30 - 7.23 (m, 1H,  $\text{CH}_{\text{Ar}}$ ), 7.15 (d, 1H,  $^3J = 7.8$  Hz,  $\text{CH}_{\text{Ar}}$ ), 7.11 - 7.05 (m, 1H,  $\text{CH}_{\text{Ar}}$ ), 7.01 (td, 1H,  $^3J = 8.4$  Hz,  $^4J = 2.4$  Hz,  $\text{CH}_{\text{Ar}}$ ), 4.24 (t, 2H,  $^3J = 7.4$  Hz,  $\text{CH}_2$ ), 1.73 (quint, 2H,  $^3J = 7.5$  Hz,  $\text{CH}_2$ ), 1.26 (sext, 2H,  $^3J = 7.5$  Hz,  $\text{CH}_2$ ), 0.89 (t, 3H,  $^3J = 7.3$  Hz,  $\text{CH}_3$ ),  $^{13}\text{C}$  NMR (126 MHz,  $\text{CDCl}_3$ ):  $\delta$  (ppm): 162.99 (d,  $^1J_{\text{CF}} = 251.7$  Hz,  $\text{C}_{\text{ipso-F}}$ ), 137.76, 137.33, 131.29 (d,  $J_{\text{CF}} = 8.1$  Hz), 130.03 (d,  $J_{\text{CF}} = 7.1$  Hz), 127.48 (d,  $J_{\text{CF}} = 3.2$  Hz), 126.66, 118.88 (d,  $^2J_{\text{CF}} = 23.1$  Hz), 115.78 (d,  $^2J_{\text{CF}} = 21.1$  Hz), 51.97, 32.04, 19.74, 13.64,  $^{19}\text{F}\{^1\text{H}\}$  NMR (188.34 MHz,  $\text{CDCl}_3$ ):  $\delta$  (ppm): -109.41 (CF), MS (GC, 70 eV):  $m/z = 343$  ( $\text{M}^+$ , 10%), 339 (21), 322 (5), 232 (97), 186 (11), 176 (29), 168 (100), 115 (10), 105 (39), 91 (44), 77 (9), 65 (17), 55 (27), 41 (38), HRMS (TOF MS ES $^+$ ): calcd for  $\text{C}_{13}\text{H}_{15}\text{FN}_3\text{O}_2\text{Se}$  ( $\text{M} + \text{H}$ ) $^+$  344.0314, found 344.0326.

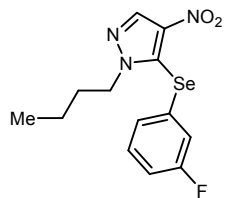

**5-(3-fluorophenylselanyl)-1-butyl-4-nitro-1H-pyrazole (4c):** yellow viscous oil,  $^1\text{H}$  NMR (500 MHz,  $\text{CDCl}_3$ ):  $\delta$  (ppm): 8.21 (s, 1H, C(3)-pyrazole), 7.39 - 7.28 (m, 2H,  $\text{CH}_{\text{Ar}}$ ), 7.08 (q, 2H,  $^3J = 8.2$  Hz,  $\text{CH}_{\text{Ar}}$ ), 4.28 (t, 2H,  $^3J = 7.4$  Hz,  $\text{CH}_2$ ), 1.74 (quint, 2H,  $^3J = 7.5$  Hz,  $\text{CH}_2$ ), 1.27 (sext, 2H,  $^3J = 7.5$  Hz,  $\text{CH}_2$ ), 0.89 (t, 3H,  $^3J = 7.4$  Hz,  $\text{CH}_3$ ),  $^{13}\text{C}$  NMR (126 MHz,  $\text{CDCl}_3$ ):  $\delta$  (ppm): 161.21 (d,  $^1J_{\text{CF}} = 245.5$  Hz,  $\text{C}_{\text{ipso-F}}$ ), 137.81, 137.23, 134.29, 131.09 (d,  $J_{\text{CF}} = 7.7$  Hz), 126.11, 125.55 (d,  $J_{\text{CF}} = 3.4$  Hz), 116.22 (d,  $^2J_{\text{CF}} = 22.7$  Hz), 115.12 (d,  $^2J_{\text{CF}} = 21.4$  Hz), 51.92, 32.03, 19.73, 13.63,  $^{19}\text{F}\{^1\text{H}\}$  NMR (188.34 MHz,  $\text{CDCl}_3$ ):  $\delta$  (ppm): -102.91 (CF), MS (GC, 70 eV):  $m/z = 343$  ( $\text{M}^+$ , 11%), 232 (42), 168 (100), 109 (53), 91 (12), 55 (17), 41 (25), HRMS (TOF MS ES+): calcd for  $\text{C}_{13}\text{H}_{15}\text{FN}_3\text{O}_2\text{Se}$  ( $\text{M} + \text{H}$ ) $^+$  344.0314, found 344.0316.

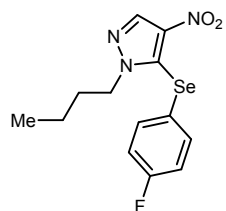

**5-(4-fluorophenylselanyl)-1-butyl-4-nitro-1H-pyrazole (4d):** yellow oil,  $^1\text{H}$  NMR (500 MHz,  $\text{CDCl}_3$ ):  $\delta$  (ppm): 8.16 (s, 1H, C(3)-pyrazole), 7.46 (d, 1H,  $^3J = 8.4$  Hz,  $\text{CH}_{\text{Ar}}$ ), 7.45 (d, 1H,  $^3J = 8.4$  Hz,  $\text{CH}_{\text{Ar}}$ ), 6.98 (t, 2H,  $^3J = 8.6$  Hz,  $\text{CH}_{\text{Ar}}$ ), 4.20 (t, 2H,  $^3J = 7.4$  Hz,  $\text{CH}_2$ ), 1.69 (quint, 2H,  $^3J = 7.5$  Hz,  $\text{CH}_2$ ), 1.23 (sext, 2H,  $^3J = 7.5$  Hz,  $\text{CH}_2$ ), 0.87 (t, 3H,  $^3J = 7.3$  Hz,  $\text{CH}_3$ ),  $^{13}\text{C}$  NMR (126 MHz,  $\text{CDCl}_3$ ):  $\delta$  (ppm): 163.08 (d,  $^1J_{\text{CF}} = 250.0$  Hz,  $\text{C}_{\text{ipso-F}}$ ), 137.28, 137.09, 135.15 (d,  $J_{\text{CF}} = 8.2$  Hz), 127.72, 122.67 (d,  $J_{\text{CF}} = 3.4$  Hz), 117.15 (d,  $^2J_{\text{CF}} = 22.0$  Hz), 51.75, 31.89, 19.65, 13.55,  $^{19}\text{F}\{^1\text{H}\}$  NMR (188.34 MHz,  $\text{CDCl}_3$ ):  $\delta$  (ppm): -110.75 (CF), MS (GC, 70 eV):  $m/z = 343$  ( $\text{M}^+$ , 23%), 232 (76), 190 (17), 175 (43), 168 (99), 109 (100), 95 (24), 83 (25), 55 (39), 41 (53), HRMS (TOF MS ES+): calcd for  $\text{C}_{13}\text{H}_{15}\text{FN}_3\text{O}_2\text{Se}$  ( $\text{M} + \text{H}$ ) $^+$  344.0314, found 344.0317.



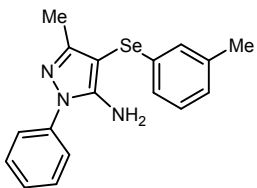

**4-(m-tolylselanyl)-3-methyl-1-phenyl-1H-pyrazol-5-amine (5a):** dark brown viscous oil,  $^1\text{H}$  NMR (500 MHz,  $\text{CDCl}_3$ ):  $\delta$  (ppm): 7.61 (dd, 2H,  $^3J = 8.5$  Hz,  $^4J = 1.1$  Hz,  $\text{CH}_{\text{Ar}}$ ), 7.49 (t, 2H,  $^3J = 7.9$  Hz,  $\text{CH}_{\text{Ar}}$ ), 7.35 (t, 1H,  $^3J = 7.4$  Hz,  $\text{CH}_{\text{Ar}}$ ), 7.11 (t, 1H,  $^3J = 7.6$  Hz,  $\text{CH}_{\text{Ar}}$ ), 7.06 (br.s, 1H,  $\text{CH}_{\text{Ar}}$ ), 7.01 (d, 1H,  $^3J = 7.8$  Hz,  $\text{CH}_{\text{Ar}}$ ), 6.97 (d, 1H,  $^3J = 7.4$  Hz,  $\text{CH}_{\text{Ar}}$ ), 4.23 (br. s, 2H,  $\text{NH}_2$ ), 2.293 (s, 3H,  $\text{CH}_3$ ), 2.290 (s, 3H,  $\text{CH}_3$ ),  $^{13}\text{C}$  NMR (126 MHz,  $\text{CDCl}_3$ ):  $\delta$  (ppm): 153.31, 148.69, 139.21, 138.75, 132.74, 129.74, 129.19, 128.64, 127.56, 126.95, 125.10, 123.54, 84.76, 21.54, 13.25, MS (GC, 70 eV):  $m/z = 343$  ( $\text{M}^+$ , 26%), 263 (100), 222 (13), 131 (15), 119 (24), 91 (15), 77 (45), 66 (12), HRMS (TOF MS ES $^+$ ): calcd for  $\text{C}_{17}\text{H}_{18}\text{N}_3\text{Se}$  ( $\text{M} + \text{H}$ ) $^+$  344.0666, found 344.0676.

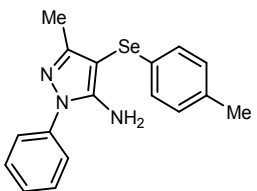

**4-(p-tolylselanyl)-3-methyl-1-phenyl-1H-pyrazol-5-amine (5b):** pale yellow crystals, mp. 98-99 °C,  $^1\text{H}$  NMR (500 MHz,  $\text{CDCl}_3$ ):  $\delta$  (ppm): 7.58 (dd, 2H,  $^3J = 8.5$  Hz,  $^4J = 1.0$  Hz,  $\text{CH}_{\text{Ar}}$ ), 7.47 (t, 2H,  $^3J = 7.9$  Hz,  $\text{CH}_{\text{Ar}}$ ), 7.33 (t, 1H,  $^3J = 7.4$  Hz,  $\text{CH}_{\text{Ar}}$ ), 7.14 (d, 2H,  $^3J = 8.2$  Hz,  $\text{CH}_{\text{Ar}}$ ), 7.04 (d, 2H,  $^3J = 8.00$  Hz,  $\text{CH}_{\text{Ar}}$ ), 4.23 (br. s, 2H,  $\text{NH}_2$ ), 2.287 (s, 3H,  $\text{CH}_3$ ), 2.282 (s, 3H,  $\text{CH}_3$ ),  $^{13}\text{C}$  NMR (126 MHz,  $\text{CDCl}_3$ ):  $\delta$  (ppm): 153.10, 148.51, 138.81, 135.75, 130.06, 129.58, 129.06, 128.26, 127.32, 123.36, 84.94, 20.99, 13.19, MS (GC, 70 eV):  $m/z = 343$  ( $\text{M}^+$ , 27%), 263 (100), 222 (12), 131 (11), 119 (17), 91 (14), 77 (35), HRMS (TOF MS ES $^+$ ): calcd for  $\text{C}_{17}\text{H}_{18}\text{N}_3\text{Se}$  ( $\text{M} + \text{H}$ ) $^+$  344.0666, found 344.0674.

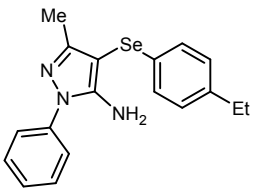

**4-(4-ethylphenylselanyl)-3-methyl-1-phenyl-1H-pyrazol-5-amine (5c):** dark brown viscous oil,  $^1\text{H}$  NMR (500 MHz,  $\text{CDCl}_3$ ):  $\delta$  (ppm): 7.58 (dd, 2H,  $^3J = 8.5$  Hz,  $^4J = 1.0$  Hz,  $\text{CH}_{\text{Ar}}$ ), 7.47 (t, 2H,  $^3J = 7.9$  Hz,  $\text{CH}_{\text{Ar}}$ ), 7.33 (t, 1H,  $^3J = 7.4$  Hz,  $\text{CH}_{\text{Ar}}$ ), 7.16 (d, 2H,  $^3J = 8.2$  Hz,  $\text{CH}_{\text{Ar}}$ ), 7.06 (d, 2H,  $^3J = 8.2$  Hz,  $\text{CH}_{\text{Ar}}$ ), 4.23 (br. s, 2H,  $\text{NH}_2$ ), 2.58 (q, 2H,  $^3J = 7.6$  Hz,  $\text{CH}_2$ ), 2.28 (s, 3H,  $\text{CH}_3$ ), 1.20 (t, 3H,  $^3J = 7.6$  Hz,  $\text{CH}_3$ ),  $^{13}\text{C}$  NMR (126 MHz,  $\text{CDCl}_3$ ):  $\delta$  (ppm): 153.19, 148.58, 142.21, 138.79, 129.61, 129.36, 128.92, 128.27, 127.38, 123.43, 84.91, 28.41, 15.65, 13.19, MS (GC, 70 eV):  $m/z = 357$  ( $\text{M}^+$ , 25%), 277 (100), 262 (32), 131 (9), 119 (16), 77 (34), HRMS (TOF MS ES+): calcd for  $\text{C}_{18}\text{H}_{20}\text{N}_3\text{Se}$  ( $\text{M} + \text{H}$ ) $^+$  358.0822, found 358.0831.

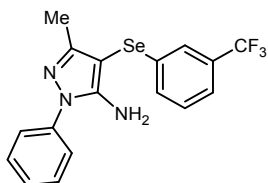

**4-(3-(trifluoromethyl)phenylselanyl)-3-methyl-1-phenyl-1H-pyrazol-5-amine (5d):** dark green powder, mp. 104-105 °C,  $^1\text{H}$  NMR (500 MHz,  $\text{CDCl}_3$ ):  $\delta$  (ppm): 7.58 (dd, 2H,  $^3J = 8.5$  Hz,  $^4J = 1.0$  Hz,  $\text{CH}_{\text{Ar}}$ ), 7.60 - 7.47 (m, 3H,  $\text{CH}_{\text{Ar}}$ ), 7.40 (d, 1H,  $^3J = 7.3$  Hz,  $\text{CH}_{\text{Ar}}$ ), 7.37 - 7.30 (m, 3H,  $\text{CH}_{\text{Ar}}$ ), 4.25 (br. s, 2H,  $\text{NH}_2$ ), 2.26 (s, 3H,  $\text{CH}_3$ ),  $^{13}\text{C}$  NMR (126 MHz,  $\text{CDCl}_3$ ):  $\delta$  (ppm): 153.12, 148.78, 138.65, 134.59, 131.54 (q,  $^2J_{\text{CF}} = 32.2$  Hz,  $\text{C}_{\text{ipso}}\text{-CF}_3$ ), 123.88 (q,  $^1J_{\text{CF}} = 272.8$  Hz,  $\text{CF}_3$ ), 131.02, 129.74, 129.59, 127.68, 124.52 (dd,  $J_{\text{CF}} = 7.6$  Hz,  $J_{\text{CF}} = 3.7$  Hz), 123.61, 122.75 (dd,  $J_{\text{CF}} = 7.1$  Hz,  $J_{\text{CF}} = 3.4$  Hz), 83.50, 13.14,  $^{19}\text{F}\{^1\text{H}\}$  NMR (188.34 MHz,  $\text{CDCl}_3$ ):  $\delta$  (ppm): -62.09 ( $\text{CF}_3$ ), MS (GC, 70 eV):  $m/z = 397$  ( $\text{M}^+$ , 40%), 317 (100), 276 (13), 131 (19), 119 (36), 77 (53), HRMS (TOF MS ES+): calcd for  $\text{C}_{17}\text{H}_{15}\text{F}_3\text{N}_3\text{Se}$  ( $\text{M} + \text{H}$ ) $^+$  398.0383, found 398.0392.

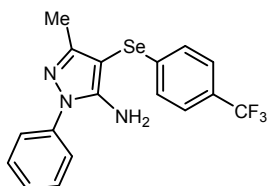

**4-(4-(trifluoromethyl)phenylselanyl)-3-methyl-1-phenyl-1H-pyrazol-5-amine (5e):** dark brown viscous oil,  $^1\text{H}$  NMR (500 MHz,  $\text{CDCl}_3$ ):  $\delta$  (ppm): 7.58 (dd, 2H,  $^3J = 8.5$  Hz,  $^4J = 1.1$  Hz,  $\text{CH}_{\text{Ar}}$ ), 7.51 - 7.42 (m, 4H,  $\text{CH}_{\text{Ar}}$ ), 7.35 (t, 1H,  $^3J = 7.4$  Hz,  $\text{CH}_{\text{Ar}}$ ), 7.30 (m, 2H,  $\text{CH}_{\text{Ar}}$ ), 4.25 (br. s, 2H,  $\text{NH}_2$ ), 2.25 (s, 3H,  $\text{CH}_3$ ),  $^{13}\text{C}$  NMR (126 MHz,  $\text{CDCl}_3$ ):  $\delta$  (ppm): 153.13, 148.78, 138.69, 138.62, 129.70, 128.07 (q,  $^2J_{\text{CF}} = 32.5$  Hz,  $\text{C}_{\text{ipso}}\text{-CF}_3$ ), 127.62, 125.94 (dd,  $J_{\text{CF}} = 7.1$  Hz,  $J_{\text{CF}} = 3.4$  Hz), 124.28 (q,  $^1J_{\text{CF}} = 271.9$  Hz,  $\text{CF}_3$ ), 123.49, 83.23, 77.16, 13.10,  $^{19}\text{F}\{^1\text{H}\}$  NMR (188.34 MHz,  $\text{CDCl}_3$ ):  $\delta$  (ppm): -61.77 ( $\text{CF}_3$ ), MS (GC, 70 eV):  $m/z = 397$  ( $\text{M}^+$ , 43%), 317 (100), 276 (13), 131 (16), 119 (33), 77 (48), HRMS (TOF MS ES+): calcd for  $\text{C}_{17}\text{H}_{15}\text{F}_3\text{N}_3\text{Se}$  ( $\text{M} + \text{H}$ ) $^+$  398.0383, found 398.0393.

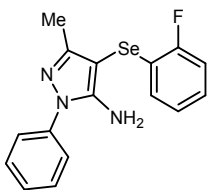

**4-(2-fluorophenylselanyl)-3-methyl-1-phenyl-1H-pyrazol-5-amine (5f):** light brown powder, mp. 97-99 °C,  $^1\text{H}$  NMR (500 MHz,  $\text{CDCl}_3$ ):  $\delta$  (ppm): 7.55 (dd, 2H,  $^3J = 8.5$  Hz,  $^4J = 1.0$  Hz,  $\text{CH}_{\text{Ar}}$ ), 7.44 (t, 2H,  $^3J = 7.9$  Hz,  $\text{CH}_{\text{Ar}}$ ), 7.31 (t, 1H,  $^3J = 7.4$  Hz,  $\text{CH}_{\text{Ar}}$ ), 7.16 - 7.09 (m, 1H,  $\text{CH}_{\text{Ar}}$ ), 7.02 - 6.94 (m, 3H,  $\text{CH}_{\text{Ar}}$ ), 4.28 (br. s, 2H,  $\text{NH}_2$ ), 2.24 (s, 3H,  $\text{CH}_3$ ),  $^{13}\text{C}$  NMR (126 MHz,  $\text{CDCl}_3$ ):  $\delta$  (ppm): 160.15 (d,  $^1J_{\text{CF}} = 241.1$  Hz,  $\text{C}_{\text{ipso-F}}$ ), 153.30, 148.93, 138.57, 129.52, 129.49 (d,  $J_{\text{CF}} = 7.3$  Hz), 127.59 (d,  $J_{\text{CF}} = 7.3$  Hz), 127.36, 124.88 (d,  $J_{\text{CF}} = 3.0$  Hz), 123.30, 119.52 (d,  $^2J_{\text{CF}} = 22.2$  Hz), 115.20 (d,  $^2J_{\text{CF}} = 22.1$  Hz), 81.63, 12.99,  $^{19}\text{F}\{^1\text{H}\}$  NMR (188.34 MHz,  $\text{CDCl}_3$ ):  $\delta$  (ppm): -107.38 (CF), MS (GC, 70 eV):  $m/z = 347$  ( $\text{M}^+$ , 39%), 267 (100), 250 (9), 226 (10), 131 (16), 119 (30), 77 (51), HRMS (TOF MS ES+): calcd for  $\text{C}_{16}\text{H}_{15}\text{FN}_3\text{Se}$  ( $\text{M} + \text{H}$ ) $^+$  348.0415, found 348.0424.

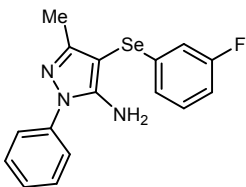

**4-(3-fluorophenylselanyl)-3-methyl-1-phenyl-1H-pyrazol-5-amine (5g):** black viscous oil,  $^1\text{H}$  NMR (500 MHz,  $\text{CDCl}_3$ ):  $\delta$  (ppm): 7.59 (d, 2H,  $^3J = 7.6$  Hz,  $\text{CH}_{\text{Ar}}$ ), 7.48 (t, 2H,  $^3J = 7.9$  Hz,  $\text{CH}_{\text{Ar}}$ ), 7.35 (t, 1H,  $^3J = 7.4$  Hz,  $\text{CH}_{\text{Ar}}$ ), 7.17 (td, 1H,  $^3J = 8.0$  Hz,  $^3J = 5.9$  Hz,  $\text{CH}_{\text{Ar}}$ ), 7.01 (d, 1H,  $^3J = 7.8$  Hz,  $\text{CH}_{\text{Ar}}$ ), 6.92 - 6.87 (m, 1H,  $\text{CH}_{\text{Ar}}$ ), 6.84 (td, 1H,  $^3J = 8.4$  Hz,  $^3J = 2.4$  Hz), 4.23 (br. s, 2H,  $\text{NH}_2$ ), 2.26 (s, 3H,  $\text{CH}_3$ ),  $^{13}\text{C}$  NMR (126 MHz,  $\text{CDCl}_3$ ):  $\delta$  (ppm): 163.33 (d,  $^1J_{\text{CF}} = 249.2$  Hz,  $\text{C}_{\text{ipso-F}}$ ), 153.11, 148.69, 138.65, 135.37 (d,  $J_{\text{CF}} = 6.2$  Hz), 130.42 (d,  $J_{\text{CF}} = 8.0$  Hz), 129.66, 127.55, 123.51, 123.35 (d,  $J_{\text{CF}} = 2.8$  Hz), 114.68 (d,  $^2J_{\text{CF}} = 23.3$  Hz), 112.84 (d,  $^2J_{\text{CF}} = 21.4$  Hz), 83.80, 13.11,  $^{19}\text{F}\{^1\text{H}\}$  NMR (188.34 MHz,  $\text{CDCl}_3$ ):  $\delta$  (ppm): -111.27 (CF), MS (GC, 70 eV):  $m/z = 347$  ( $\text{M}^+$ , 35%), 267 (100), 226 (13), 131 (15), 119 (30), 77 (49), HRMS (TOF MS ES+): calcd for  $\text{C}_{16}\text{H}_{15}\text{FN}_3\text{Se}$  ( $\text{M} + \text{H}$ ) $^+$  348.0415, found 348.0422.

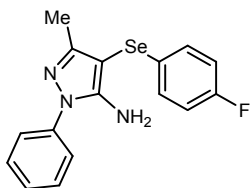

**4-(4-fluorophenylselanyl)-3-methyl-1-phenyl-1H-pyrazol-5-amine (5h):** light brown viscous oil,  $^1\text{H}$  NMR (500 MHz,  $\text{CDCl}_3$ ):  $\delta$  (ppm): 7.58 (dd, 2H,  $^3J = 8.5$  Hz,  $^4J = 1.2$  Hz,  $\text{CH}_{\text{Ar}}$ ), 7.50 - 7.45 (m, 2H,  $\text{CH}_{\text{Ar}}$ ), 7.34 (t, 1H,  $^3J = 7.4$  Hz,  $\text{CH}_{\text{Ar}}$ ), 7.22 - 7.17 (m, 2H,  $\text{CH}_{\text{Ar}}$ ), 6.93 (t, 2H,  $^3J = 8.8$  Hz,  $\text{CH}_{\text{Ar}}$ ), 4.24 (br. s, 2H,  $\text{NH}_2$ ), 2.27 (s, 3H,  $\text{CH}_3$ ),  $^{13}\text{C}$  NMR (126 MHz,  $\text{CDCl}_3$ ):  $\delta$  (ppm): 161.76 (d,  $^1J_{\text{CF}} = 244.8$  Hz,  $\text{C}_{\text{ipso-F}}$ ), 153.04, 148.57, 138.73, 129.97 (d,  $J_{\text{CF}} = 7.6$  Hz), 129.70, 127.55, 127.32 (d,  $J_{\text{CF}} = 2.9$  Hz), 123.49, 116.42 (d,  $^2J_{\text{CF}} = 21.7$  Hz), 84.99, 13.20,  $^{19}\text{F}\{^1\text{H}\}$  NMR (188.34 MHz,  $\text{CDCl}_3$ ):  $\delta$  (ppm): -116.26 (CF), MS (GC, 70 eV):  $m/z = 347$  ( $\text{M}^+$ , 31%), 267 (100), 226 (14), 131 (12), 119 (25), 77 (45), 66 (14), HRMS (TOF MS ES+): calcd for  $\text{C}_{16}\text{H}_{15}\text{FN}_3\text{Se}$  ( $\text{M} + \text{H}$ ) $^+$  348.0415, found 348.0426.

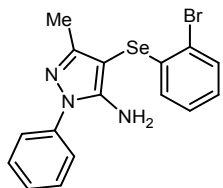

**4-(2-bromophenylselanyl)-3-methyl-1-phenyl-1H-pyrazol-5-amine (5i):** green crystals, mp. 109-110 °C,  $^1\text{H}$  NMR (500 MHz,  $\text{CDCl}_3$ ):  $\delta$  (ppm): 7.60 (dd, 2H,  $^3J = 8.5$  Hz,  $^4J = 1.1$  Hz,  $\text{CH}_{\text{Ar}}$ ), 7.53 - 7.44 (m, 3H,  $\text{CH}_{\text{Ar}}$ ), 7.36 (t, 1H,  $^3J = 7.4$  Hz,  $\text{CH}_{\text{Ar}}$ ), 7.13 (td, 1H,  $^3J = 7.8$  Hz,  $^4J = 1.3$  Hz,  $\text{CH}_{\text{Ar}}$ ), 7.03 (td, 1H,  $^3J = 7.6$  Hz,  $^4J = 1.6$  Hz,  $\text{CH}_{\text{Ar}}$ ), 6.85 (dd, 1H,  $^3J = 7.9$  Hz,  $^4J = 1.6$  Hz,  $\text{CH}_{\text{Ar}}$ ), 4.25 (br. s, 2H,  $\text{NH}_2$ ), 2.26 (s, 3H,  $\text{CH}_3$ ),  $^{13}\text{C}$  NMR (126 MHz,  $\text{CDCl}_3$ ):  $\delta$  (ppm): 153.55, 149.01, 138.61, 135.48, 132.90, 129.77, 128.03, 127.95, 127.70, 127.08, 123.59, 122.16, 84.35, 13.14, MS (GC, 70 eV):  $m/z = 407$  ( $\text{M}^+$ , 40), 329 (46), 327 (46), 247 (30), 233 (11), 156 (12), 131 (35), 119 (56), 104 (14), 77 (100), 66 (28), 51 (24), 39 (17), HRMS (TOF MS ES+): calcd for  $\text{C}_{16}\text{H}_{15}\text{BrN}_3\text{Se}$  ( $\text{M} + \text{H}$ ) $^+$  407.9615, found 407.9617.

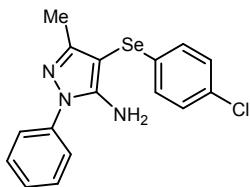

**4-(4-chlorophenylselanyl)-3-methyl-1-phenyl-1H-pyrazol-5-amine (5j):** dark brown viscous oil,  $^1\text{H}$  NMR (500 MHz,  $\text{CDCl}_3$ ):  $\delta$  (ppm): 7.59 (dd, 2H,  $^3J = 8.5$  Hz,  $^4J = 1.1$  Hz,  $\text{CH}_{\text{Ar}}$ ), 7.50 (t, 2H,  $^3J = 7.9$  Hz,  $\text{CH}_{\text{Ar}}$ ), 7.37 (t, 1H,  $^3J = 7.4$  Hz,  $\text{CH}_{\text{Ar}}$ ), 7.21 - 7.13 (m, 4H,  $\text{CH}_{\text{Ar}}$ ), 4.24 (br. s, 2H,  $\text{NH}_2$ ), 2.27 (s, 3H,  $\text{CH}_3$ ),  $^{13}\text{C}$  NMR (126 MHz,  $\text{CDCl}_3$ ):  $\delta$  (ppm): 153.04, 148.63, 138.64, 131.91, 131.30, 129.67, 129.33, 129.27, 127.54, 123.45, 84.22, 13.14, MS (GC, 70 eV):  $m/z = 363$  ( $\text{M}^+$ , 29%), 283 (100), 247 (12), 131 (14), 119 (32), 77 (61), 66 (18), 51 (15), 39 (11), HRMS (TOF MS ES+): calcd for  $\text{C}_{16}\text{H}_{15}\text{ClN}_3\text{Se}$  ( $\text{M} + \text{H}$ ) $^+$  364.0120, found 364.0122.

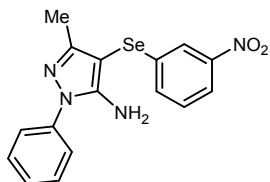

**4-(3-nitrophenylselanyl)-3-methyl-1-phenyl-1H-pyrazol-5-amine (5k):** green powder, mp. 150-151 °C,  $^1\text{H}$  NMR (500 MHz,  $\text{CDCl}_3$ ):  $\delta$  (ppm): 8.08 (t, 1H,  $^4J = 1.9$  Hz,  $\text{CH}_{\text{Ar}}$ ), 8.00 (ddd, 1H,  $^3J = 8.0$  Hz,  $^4J = 2.2$  Hz,  $^4J = 0.9$  Hz,  $\text{CH}_{\text{Ar}}$ ), 7.60 (dd, 2H,  $^3J = 8.5$  Hz,  $^4J = 1.1$  Hz,  $\text{CH}_{\text{Ar}}$ ), 7.54 - 7.47 (m, 3H,  $\text{CH}_{\text{Ar}}$ ), 7.38 (t, 2H,  $^3J = 8.0$  Hz,  $\text{CH}_{\text{Ar}}$ ), 4.28 (br. s, 2H,  $\text{NH}_2$ ), 2.27 (s, 3H,  $\text{CH}_3$ ),  $^{13}\text{C}$  NMR (126 MHz,  $\text{CDCl}_3$ ):  $\delta$  (ppm): 153.05, 148.94, 148.89, 138.46, 135.88, 133.64, 129.93, 129.86, 127.95, 123.79, 122.68, 120.99, 83.21, 13.17, MS (GC, 70 eV):  $m/z = 374$  ( $\text{M}^+$ , 40%), 294 (100), 247 (17), 131 (30), 119 (52), 77 (70), 66 (16), 51 (16), 39 (11), HRMS (TOF MS ES+): calcd for  $\text{C}_{16}\text{H}_{15}\text{N}_4\text{O}_2\text{Se}$  ( $\text{M} + \text{H}$ ) $^+$  375.0360, found 375.0365.

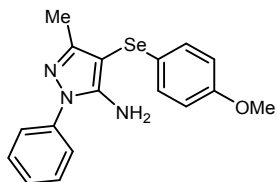

**4-(4-methoxyphenylselanyl)-3-methyl-1-phenyl-1H-pyrazol-5-amine (5l):** dark yellow viscous oil,  $^1\text{H}$  NMR (500 MHz,  $\text{CDCl}_3$ ):  $\delta$  (ppm): 7.58 (dd, 2H,  $^3J = 8.5$  Hz,  $^4J = 1.1$  Hz,  $\text{CH}_{\text{Ar}}$ ), 7.48 (t, 2H,  $^3J = 7.9$  Hz,  $\text{CH}_{\text{Ar}}$ ), 7.34 (t, 1H,  $^3J = 7.4$  Hz,  $\text{CH}_{\text{Ar}}$ ), 7.21 (d, 2H,  $^3J = 8.9$  Hz,  $\text{CH}_{\text{Ar}}$ ), 6.79 (d, 2H,  $^3J = 8.8$  Hz,  $\text{CH}_{\text{Ar}}$ ), 4.23 (br. s, 2H,  $\text{NH}_2$ ), 3.76 (s, 3H,  $\text{OCH}_3$ ), 2.29 (s, 3H,  $\text{CH}_3$ ),  $^{13}\text{C}$  NMR (126 MHz,  $\text{CDCl}_3$ ):  $\delta$  (ppm): 158.63, 153.03, 148.45, 138.77, 130.45, 129.72, 127.52, 123.53, 122.79, 115.14, 85.95, 55.46, 13.26, MS (GC, 70 eV):  $m/z = 359$  ( $\text{M}^+$ , 19%), 279 (100), 264 (35), 119 (20), 77 (42), 66 (10), HRMS (TOF MS ES+): calcd for  $\text{C}_{17}\text{H}_{18}\text{N}_3\text{OSe}$  ( $\text{M} + \text{H}$ ) $^+$  360.0615, found 360.0631.

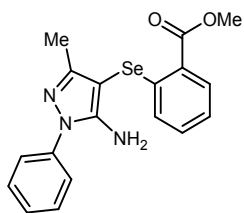

**methyl 2-[(5-amino-3-methyl-1-phenyl-1H-pyrazol-4-yl)selenanyl]benzoate (5m):** dark green crystals, mp. 160-163 °C,  $^1\text{H}$  NMR (500 MHz,  $\text{CDCl}_3$ ):  $\delta$  (ppm): 8.07 (dd, 1H,  $^3J = 7.8$  Hz,  $^4J = 1.4$  Hz,  $\text{CH}_{\text{Ar}}$ ), 7.61 (dd, 2H,  $^3J = 8.4$  Hz,  $^4J = 1.0$  Hz,  $\text{CH}_{\text{Ar}}$ ), 7.48 (t, 2H,  $^3J = 7.9$  Hz,  $\text{CH}_{\text{Ar}}$ ), 7.36 - 7.28 (m, 2H,  $\text{CH}_{\text{Ar}}$ ), 7.22 - 7.17 (m, 1H,  $\text{CH}_{\text{Ar}}$ ), 7.13 (dd, 1H,  $^3J = 8.9$  Hz,  $^4J = 0.8$  Hz,  $\text{CH}_{\text{Ar}}$ ), 4.21 (br. s, 2H,  $\text{NH}_2$ ), 3.97 (s, 3H,  $\text{COOCH}_3$ ), 2.22 (s, 3H,  $\text{CH}_3$ ),  $^{13}\text{C}$  NMR (126 MHz,  $\text{CDCl}_3$ ):  $\delta$  (ppm): 167.64, 153.82, 149.09, 139.31, 138.82, 133.00, 131.82, 129.66, 127.70, 127.42, 125.09, 123.46, 85.23, 52.43, 13.19, MS (GC, 70 eV):  $m/z = 387$  ( $\text{M}^+$ , 100%), 307 (64), 275 (75), 252 (22), 215 (20), 184 (14), 172 (43), 157 (12), 131 (44), 119 (61), 104 (17), 91 (16), 77 (95), 66 (21), 51 (17), 39 (11), HRMS (TOF MS ES+): calcd for  $\text{C}_{18}\text{H}_{18}\text{N}_3\text{O}_2\text{Se}$  ( $\text{M} + \text{H}$ ) $^+$  388.0564, found 388.0578.

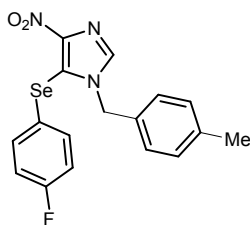

**5-(4-fluorophenylselenanyl)-1-[(4-methylphenyl)methyl]-4-nitro-1H-imidazole (6):** light yellow crystals, mp. 114-115 °C,  $^1\text{H}$  NMR (500 MHz,  $\text{CDCl}_3$ ):  $\delta$  (ppm): 7.55 (s, 1H, C(2)-imidazole), 7.36 - 7.28 (m, 2H,  $\text{CH}_{\text{Ar}}$ ), 7.12 (d, 2H,  $^3J = 7.9$  Hz,  $\text{CH}_{\text{Ar}}$ ), 6.95 - 6.88 (m, 4H,  $\text{CH}_{\text{Ar}}$ ), 5.17 (s, 2H,  $\text{CH}_2$ ), 2.34 (s, 3H,  $\text{CH}_3$ ),  $^{13}\text{C}$  NMR (126 MHz,  $\text{CDCl}_3$ ):  $\delta$  (ppm): 163.06 (d,  $^1J_{\text{CF}} = 249.6$  Hz,  $\text{C}_{\text{ipso-F}}$ ), 150.69, 138.99, 137.88, 134.90 (d,  $J_{\text{CF}} = 8.1$  Hz), 131.05, 130.02, 127.55, 123.03 (d,  $J_{\text{CF}} = 3.5$  Hz), 117.80, 117.07 (d,  $^2J_{\text{CF}} = 22.0$  Hz), 51.06, 21.23,  $^{19}\text{F}\{^1\text{H}\}$  NMR (188.34 MHz,  $\text{CDCl}_3$ ):  $\delta$  (ppm): -111.27 (CF), MS (GC, 70 eV):  $m/z = 391$  ( $\text{M}^+$ , 8%), 280 (3), 105 (100), 79 (14), HRMS (TOF MS ES+): calcd for  $\text{C}_{17}\text{H}_{15}\text{FN}_3\text{O}_2\text{Se}$  ( $\text{M} + \text{H}$ ) $^+$  392.0314, found 392.0313.

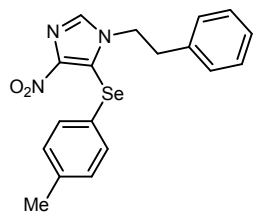

**5-(p-tolylselanyl)-4-nitro-1-phenethyl-1H-imidazole (7a):** yellow powder, mp. 94-95 °C,  $^1\text{H}$  NMR (500 MHz,  $\text{CDCl}_3$ ):  $\delta$  (ppm): 7.32 (d, 2H,  $^3J = 8.1$  Hz,  $\text{CH}_{\text{Ar}}$ ), 7.30 - 7.22 (m, 4H,  $\text{CH}_{\text{Ar}}$ ), 7.09 (d, 2H,  $^3J = 8.0$  Hz  $\text{CH}_{\text{Ar}}$ ), 6.95 (d, 2H,  $^3J = 6.4$  Hz,  $\text{CH}_{\text{Ar}}$ ), 4.22 (t, 2H,  $^3J = 7.1$  Hz,  $\text{CH}_2$ ), 2.90 (t, 2H,  $^3J = 7.1$  Hz,  $\text{CH}_2$ ), 2.31 (s, 3H,  $\text{CH}_3$ ),  $^{13}\text{C}$  NMR (126 MHz,  $\text{CDCl}_3$ ):  $\delta$  (ppm): 150.46, 139.01, 137.73, 136.32, 132.39, 130.85, 129.16, 128.74, 127.55, 125.02, 48.99, 36.86, 21.27, MS (GC, 70 eV):  $m/z = 387$  ( $\text{M}^+$ , 8%), 280 (27), 105 (100), 91 (33), 79 (23), HRMS (TOF MS ES $^+$ ): calcd for  $\text{C}_{18}\text{H}_{18}\text{N}_3\text{O}_2\text{Se}$  ( $\text{M} + \text{H}$ ) $^+$  388.0564, found 388.0566.

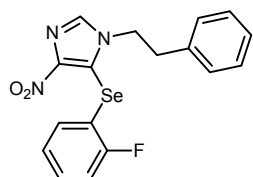

**5-(2-fluorophenylselanyl)-4-nitro-1-phenethyl-1H-imidazole (7b):** yellow powder, mp. 100-101 °C,  $^1\text{H}$  NMR (500 MHz,  $\text{CDCl}_3$ ):  $\delta$  (ppm): 7.33 (s, 1H, C(2)-imidazole), 7.33 - 7.22 (m, 5H,  $\text{CH}_{\text{Ar}}$ ), 7.10 - 7.03 (m, 2H,  $\text{CH}_{\text{Ar}}$ ), 7.02 - 6.97 (m, 2H,  $\text{CH}_{\text{Ar}}$ ), 4.37 (t, 2H,  $^3J = 7.0$  Hz,  $\text{CH}_2$ ), 2.97 (t, 2H,  $^3J = 7.0$  Hz,  $\text{CH}_2$ ),  $^{13}\text{C}$  NMR (126 MHz,  $\text{CDCl}_3$ ):  $\delta$  (ppm): 161.05 (d,  $^1J_{\text{CF}} = 244.6$  Hz,  $\text{C}_{\text{ipso-F}}$ ), 150.96, 137.79, 136.21, 133.89, 130.84 (d,  $J_{\text{CF}} = 7.7$  Hz), 129.18, 128.77, 127.60, 125.56 (d,  $J_{\text{CF}} = 3.3$  Hz), 116.17 (d,  $^2J_{\text{CF}} = 22.7$  Hz), 115.96, 115.64 (d,  $^2J_{\text{CF}} = 21.5$  Hz), 48.98, 37.28,  $^{19}\text{F}\{^1\text{H}\}$  NMR (188.34 MHz,  $\text{CDCl}_3$ ):  $\delta$  (ppm): -103.60 (CF), MS (GC, 70 eV):  $m/z = 391$  ( $\text{M}^+$ , 11%), 280 (18), 105 (100), 91 (48), 79 (29), HRMS (TOF MS ES $^+$ ): calcd for  $\text{C}_{17}\text{H}_{15}\text{FN}_3\text{O}_2\text{Se}$  ( $\text{M} + \text{H}$ ) $^+$  392.0314, found 392.0316.

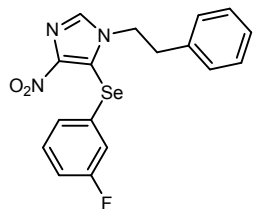

**5-(3-fluorophenylselanyl)-4-nitro-1-phenethyl-1H-imidazole (7c):** yellow powder, mp. 71-72 °C,  $^1\text{H}$  NMR (500 MHz,  $\text{CDCl}_3$ ):  $\delta$  (ppm): 7.35 (s, 1H, C(2)-imidazole), 7.30 - 7.21 (m, 4H,  $\text{CH}_{\text{Ar}}$ ), 7.10 (d, 1H,  $^3J = 7.8$  Hz,  $\text{CH}_{\text{Ar}}$ ), 7.02 (d, 1H,  $^3J = 8.3$  Hz,  $\text{CH}_{\text{Ar}}$ ), 6.99 - 6.94 (m, 3H,  $\text{CH}_{\text{Ar}}$ ), 4.29 (t, 2H,  $^3J = 7.0$  Hz,  $\text{CH}_2$ ), 2.94 (t, 2H,  $^3J = 7.0$  Hz,  $\text{CH}_2$ ),  $^{13}\text{C}$  NMR (126 MHz,  $\text{CDCl}_3$ ):  $\delta$  (ppm): 163.00 (d,  $^1J_{\text{CF}} = 251.6$  Hz,  $\text{C}_{\text{ipso-F}}$ ), 150.96, 138.04, 136.05, 131.26 (d,  $J_{\text{CF}} = 8.1$  Hz), 130.69 (d,  $J_{\text{CF}} = 6.9$  Hz), 129.15, 128.67, 127.58, 126.66 (d,  $J_{\text{CF}} = 3.1$  Hz), 118.06 (d,  $^2J_{\text{CF}} = 23.1$  Hz), 116.30, 115.46 (d,  $^2J_{\text{CF}} = 21.1$  Hz), 48.99, 37.02,  $^{19}\text{F}\{^1\text{H}\}$  NMR (188.34 MHz,  $\text{CDCl}_3$ ):  $\delta$  (ppm): -109.35 (CF), MS (GC, 70 eV):  $m/z = 391$  ( $\text{M}^+$ , 12%), 280 (14), 105 (100), 91 (49), 79 (31), HRMS (TOF MS ES+): calcd for  $\text{C}_{17}\text{H}_{15}\text{FN}_3\text{O}_2\text{Se}$  ( $\text{M} + \text{H}$ ) $^+$  392.0314, found 392.0321.

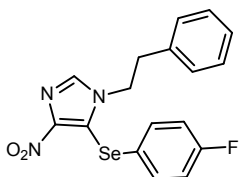

**5-(4-fluorophenylselanyl)-4-nitro-1-phenethyl-1H-imidazole (7d):** yellow powder, mp. 105-106 °C,  $^1\text{H}$  NMR (500 MHz,  $\text{CDCl}_3$ ):  $\delta$  (ppm): 7.45 - 7.37 (m, 2H,  $\text{CH}_{\text{Ar}}$ ), 7.29 (s, 1H, C(2)-imidazole), 7.28 - 7.22 (m, 3H,  $\text{CH}_{\text{Ar}}$ ), 7.01 - 6.93 (m, 4H,  $\text{CH}_{\text{Ar}}$ ), 4.29 (t, 2H,  $^3J = 7.0$  Hz,  $\text{CH}_2$ ), 2.94 (t, 2H,  $^3J = 7.0$  Hz,  $\text{CH}_2$ ),  $^{13}\text{C}$  NMR (126 MHz,  $\text{CDCl}_3$ ):  $\delta$  (ppm): 163.01 (d,  $^1J_{\text{CF}} = 249.7$  Hz,  $\text{C}_{\text{ipso-F}}$ ), 150.50, 137.75, 136.12, 134.45 (d,  $J_{\text{CF}} = 8.1$  Hz), 129.17, 128.68, 127.59, 123.31 (d,  $J_{\text{CF}} = 3.3$  Hz), 117.63, 117.25 (d,  $^2J_{\text{CF}} = 22.0$  Hz), 48.90, 36.99,  $^{19}\text{F}\{^1\text{H}\}$  NMR (188.34 MHz,  $\text{CDCl}_3$ ):  $\delta$  (ppm): -111.13 (CF), MS (GC, 70 eV):  $m/z = 391$  ( $\text{M}^+$ , 7%), 280 (13), 105 (100), 91 (42), 79 (25), HRMS (TOF MS ES+): calcd for  $\text{C}_{17}\text{H}_{15}\text{FN}_3\text{O}_2\text{Se}$  ( $\text{M} + \text{H}$ ) $^+$  392.0314, found 392.0318.

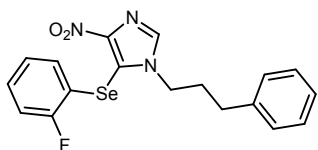

**5-(2-fluorophenylselanyl)-4-nitro-1-phenylpropyl-1H-imidazole (8):** yellow viscous oil,  $^1\text{H}$  NMR (500 MHz,  $\text{CDCl}_3$ ):  $\delta$  (ppm): 7.78 (br. s. 1H, C(2)-imidazole), 7.30 - 7.19 (m, 5H,  $\text{CH}_{\text{Ar}}$ ), 7.10 - 7.02 (m, 4H,  $\text{CH}_{\text{Ar}}$ ), 4.08 (t, 2H,  $^3J = 7.4$  Hz,  $\text{CH}_2$ ), 2.60 (t, 2H,  $^3J = 7.4$  Hz,  $\text{CH}_2$ ), 2.06 (quint, 2H,  $^3J = 7.4$  Hz,  $\text{CH}_2$ ),  $^{13}\text{C}$  NMR (126 MHz,  $\text{CDCl}_3$ ):  $\delta$  (ppm): 160.94 (d,  $^1J_{\text{CF}} = 244.9$  Hz,  $\text{C}_{\text{ipso-F}}$ ), 139.54, 133.66, 130.74 (d,  $J_{\text{CF}} = 7.7$  Hz), 128.74, 128.24, 126.58, 125.50 (d,  $J_{\text{CF}} = 3.2$  Hz), 116.11 (d,  $^2J_{\text{CF}} = 22.5$  Hz), 115.47 (d,  $^2J_{\text{CF}} = 21.4$  Hz), 47.36, 32.50, 31.87,  $^{19}\text{F}\{^1\text{H}\}$  NMR (188.34 MHz,  $\text{CDCl}_3$ ):  $\delta$  (ppm): -103.55 (CF), MS (GC, 70 eV):  $m/z = 405$  ( $\text{M}^+$ , 17%), 294 (13), 230 (26), 184 (38), 117 (68), 91 (100), HRMS (TOF MS ES+): calcd for  $\text{C}_{18}\text{H}_{17}\text{FN}_3\text{O}_2\text{Se}$  ( $\text{M} + \text{H}$ ) $^+$  406.0470, found 406.0469.



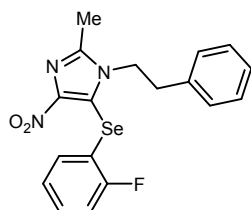

**5-(2-fluorophenylselanyl)-2-methyl-4-nitro-1-phenethyl-1H-imidazole (9a):** dark yellow powder, mp. 85-86 °C,  $^1\text{H}$  NMR (500 MHz,  $\text{CDCl}_3$ ):  $\delta$  (ppm): 7.33 - 7.23 (m, 5H,  $\text{CH}_{\text{Ar}}$ ), 7.05 (q, 2H,  $^3J = 7.8$  Hz,  $\text{CH}_{\text{Ar}}$ ), 7.01 - 6.98 (m, 2H,  $\text{CH}_{\text{Ar}}$ ), 4.31 (t, 2H,  $^3J = 7.1$  Hz,  $\text{CH}_2$ ), 2.93 (t, 2H,  $^3J = 7.1$  Hz,  $\text{CH}_2$ ), 2.21 (s, 3H,  $\text{CH}_3$ ),  $^{13}\text{C}$  NMR (126 MHz,  $\text{CDCl}_3$ ):  $\delta$  (ppm): 160.92 (d,  $^1J_{\text{CF}} = 244.1$  Hz,  $\text{C}_{\text{ipso-F}}$ ), 150.07, 147.01, 136.40, 133.55, 133.54 (d,  $J = 1.9$  Hz), 130.57 (d,  $J_{\text{CF}} = 7.7$  Hz), 129.19, 128.94, 127.62, 125.52 (d,  $J_{\text{CF}} = 3.3$  Hz), 116.10 (d,  $^2J_{\text{CF}} = 22.3$  Hz), 115.31, 47.96, 36.93, 13.96,  $^{19}\text{F}\{^1\text{H}\}$  NMR (188.34 MHz,  $\text{CDCl}_3$ ):  $\delta$  (ppm): -103.97 (CF), MS (GC, 70 eV):  $m/z = 405$  ( $\text{M}^+$ , 14%), 294 (12), 230 (12), 213 (12), 184 (8), 105 (100), 91 (43), 79 (30), HRMS (TOF MS ES $^+$ ): calcd for  $\text{C}_{18}\text{H}_{17}\text{FN}_3\text{O}_2\text{Se}$  ( $\text{M} + \text{H}$ ) $^+$  406.0470, found 406.0475.

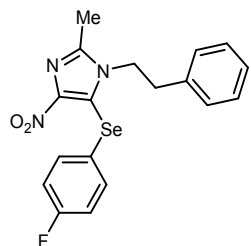

**5-(4-fluorophenylselanyl)-2-methyl-4-nitro-1-phenethyl-1H-imidazole (9b):** yellow powder, mp. 108-109 °C,  $^1\text{H}$  NMR (500 MHz,  $\text{CDCl}_3$ ):  $\delta$  (ppm): 7.43 (dd, 2H,  $^3J = 8.7$  Hz,  $^3J = 5.2$  Hz,  $\text{CH}_{\text{Ar}}$ ), 7.32 - 7.26 (m, 3H,  $\text{CH}_{\text{Ar}}$ ), 6.98 (m, 4H,  $\text{CH}_{\text{Ar}}$ ), 4.24 (t, 2H,  $^3J = 7.1$  Hz,  $\text{CH}_2$ ), 2.90 (t, 2H,  $^3J = 7.1$  Hz,  $\text{CH}_2$ ), 2.16 (s, 3H,  $\text{CH}_3$ ),  $^{13}\text{C}$  NMR (126 MHz,  $\text{CDCl}_3$ ):  $\delta$  (ppm): 162.98 (d,  $^1J_{\text{CF}} = 249.1$  Hz,  $\text{C}_{\text{ipso-F}}$ ), 149.67, 146.94, 136.36, 134.11 (d,  $J_{\text{CF}} = 8.1$  Hz), 129.23, 128.85, 127.66, 123.86 (d,  $J_{\text{CF}} = 2.8$  Hz), 117.24 (d,  $^2J_{\text{CF}} = 22.0$  Hz), 116.96, 47.87, 36.74, 13.93,  $^{19}\text{F}\{^1\text{H}\}$  NMR (188.34 MHz,  $\text{CDCl}_3$ ):  $\delta$  (ppm): -111.54 (CF), MS (GC, 70 eV):  $m/z = 405$  ( $\text{M}^+$ , 11%), 294 (18), 230 (10), 213 (10), 105 (100), 91 (36), 79 (26), HRMS (TOF MS ES $^+$ ): calcd for  $\text{C}_{18}\text{H}_{17}\text{FN}_3\text{O}_2\text{Se}$  ( $\text{M} + \text{H}$ ) $^+$  406.0470, found 406.0466.

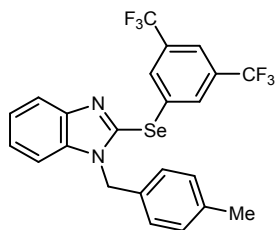

**2-(3,5-bis(trifluoromethyl)phenylselanyl)-1-[(4-methylphenyl)methyl]-1H-benzo[d]imidazole (10a):** yellow powder, mp. 94-95 °C,  $^1\text{H}$  NMR (500 MHz,  $\text{CDCl}_3$ ):  $\delta$  (ppm): 7.86 - 7.83 (m, 3H,  $\text{CH}_{\text{Ar}}$ ), 7.67 (s, 1H,  $\text{CH}_{\text{Ar}}$ ), 7.36 - 7.29 (m, 3H,  $\text{CH}_{\text{Ar}}$ ), 6.96 (d, H,  $^3J = 7.9$  Hz,  $\text{CH}_{\text{Ar}}$ ), 6.83 (d, H,  $^3J = 7.9$  Hz,  $\text{CH}_{\text{Ar}}$ ), 5.48 (s, 2H,  $\text{CH}_2$ ), 2.24 (s, 3H,  $\text{CH}_3$ ),  $^{13}\text{C}$  NMR (126 MHz,  $\text{CDCl}_3$ ):  $\delta$  (ppm): 141.91, 137.82, 136.11, 132.41, 132.25 - 132.13 (m,  $\text{C}_{\text{ipso}}\text{-CF}_3$ ), 131.00, 129.53, 126.26, 124.16, 122.98, 122.64 (q,  $^1J_{\text{CF}} = 272.9$  Hz,  $\text{CF}_3$ ), 121.72 (m), 120.18, 110.27, 48.90, 20.92.  $^{19}\text{F}\{^1\text{H}\}$  NMR (188.34 MHz,  $\text{CDCl}_3$ ):  $\delta$  (ppm): -62.37 ( $\text{CF}_3$ ), MS (GC, 70 eV):  $m/z = 514$  ( $\text{M}^+$ , 8%), 433 (3), 317 (11), 105 (100), 79 (12), HRMS (TOF MS ES+): calcd for  $\text{C}_{23}\text{H}_{17}\text{F}_6\text{N}_2\text{Se}$  ( $\text{M} + \text{H}$ ) $^+$  515.0461, found 515.0462.

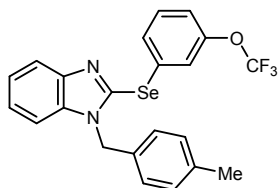

**2-(3-(trifluoromethoxy)phenylselanyl)-1-[(4-methylphenyl)methyl]-1H-benzo[d]imidazole (10b):** yellow viscous oil,  $^1\text{H}$  NMR (500 MHz,  $\text{CDCl}_3$ ):  $\delta$  (ppm): 7.85 - 7.83 (m, 1H,  $\text{CH}_{\text{Ar}}$ ), 7.40 (d, 1H,  $^3J = 7.9$  Hz,  $\text{CH}_{\text{Ar}}$ ), 7.34 (s, 1H,  $\text{CH}_{\text{Ar}}$ ), 7.30 - 7.25 (m, 3H,  $\text{CH}_{\text{Ar}}$ ), 7.22 (t, 1H,  $^3J = 8.0$  Hz,  $\text{CH}_{\text{Ar}}$ ), 7.08 (d, 1H,  $^3J = 8.3$  Hz,  $\text{CH}_{\text{Ar}}$ ), 7.02 (d, 2H,  $^3J = 7.9$  Hz,  $\text{CH}_{\text{Ar}}$ ), 6.89 (d, 2H,  $^3J = 8.0$  Hz,  $\text{CH}_{\text{Ar}}$ ), 5.44 (s, 2H,  $\text{CH}_2$ ), 2.28 (s, 3H,  $\text{CH}_3$ ),  $^{13}\text{C}$  NMR (126 MHz,  $\text{CDCl}_3$ ):  $\delta$  (ppm): 149.53, 144.01, 143.15, 137.82, 136.04, 132.62, 130.67, 130.64, 130.11, 129.58, 126.58, 124.71, 123.86, 122.81, 120.40 (q,  $J_{\text{CF}} = 257.9$  Hz,  $\text{OCF}_3$ ), 120.35, 120.14, 110.48, 49.08, 21.12,  $^{19}\text{F}\{^1\text{H}\}$  NMR (188.34 MHz,  $\text{CDCl}_3$ ):  $\delta$  (ppm): -57.15 ( $\text{CF}_3$ ), MS (GC, 70 eV):  $m/z = 462$  ( $\text{M}^+$ , 9%), 382 (8), 265 (13), 105 (100), 79 (13), HRMS (TOF MS ES+): calcd for  $\text{C}_{22}\text{H}_{18}\text{F}_3\text{N}_2\text{OSe}$  ( $\text{M} + \text{H}$ ) $^+$  463.0536, found 463.0557.

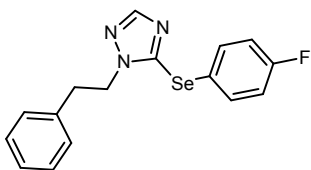

**5-(4-fluorophenylselanyl)-1-phenethyl-1H-1,2,4-triazole (11):** yellow powder, mp. 87-88 °C,  $^1\text{H}$  NMR (500 MHz,  $\text{CDCl}_3$ ):  $\delta$  (ppm): 7.97 (s, 1H, C(3)-triazole), 7.45 - 7.41 (m, 2H,  $\text{CH}_{\text{Ar}}$ ), 7.28 - 7.22 (m, 3H,  $\text{CH}_{\text{Ar}}$ ), 7.04 - 7.02 (m, 2H,  $\text{CH}_{\text{Ar}}$ ), 7.00 - 6.95 (m, 2H,  $\text{CH}_{\text{Ar}}$ ), 4.44 (t, 2H,  $^3J = 7.2$  Hz,  $\text{CH}_2$ ), 3.10 (t, 2H,  $^3J = 7.2$  Hz,  $\text{CH}_2$ ),  $^{13}\text{C}$  NMR (126 MHz,  $\text{CDCl}_3$ ):  $\delta$  (ppm): 163.16 (d,  $^1J_{\text{CF}} = 249.4$  Hz,  $\text{C}_{\text{ipso-F}}$ ), 152.78, 137.16, 135.80 (d,  $J_{\text{CF}} = 8.2$  Hz), 128.91, 128.89, 127.14, 121.67 (d,  $J_{\text{CF}} = 3.3$  Hz), 117.02 (d,  $^2J_{\text{CF}} = 21.9$  Hz), 51.24, 36.32,  $^{19}\text{F}\{^1\text{H}\}$  NMR (188.34 MHz,  $\text{CDCl}_3$ ):  $\delta$  (ppm): -111.33 (CF), MS (GC, 70 eV):  $m/z = 347$  ( $\text{M}^+$ , 37%), 243 (100), 216 (14), 175 (23), 163 (26), 136 (19), 122 (18), 104 (70), 91 (82), 77 (32), 65 (30), 55 (54), HRMS (TOF MS ES+): calcd for  $\text{C}_{16}\text{H}_{15}\text{FN}_3\text{Se}$  ( $\text{M} + \text{H}$ ) $^+$  348.0415, found 348.0420.

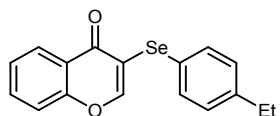

**3-(4-ethylphenylselanyl)-4H-chromen-4-one (12a):** yellow viscous oil,  $^1\text{H}$  NMR (500 MHz,  $\text{CDCl}_3$ ):  $\delta$  (ppm): 8.24 (dd, 1H,  $^3J = 8.3$  Hz,  $^4J = 1.6$  Hz,  $\text{CH}_{\text{Ar}}$ ), 7.79 (s, 1H,  $\text{CH}_{\text{Ar}}$ ), 7.70 - 7.62 (m, 1H,  $\text{CH}_{\text{Ar}}$ ), 7.55 (d, 2H,  $^3J = 8.1$  Hz,  $\text{CH}_{\text{Ar}}$ ), 7.44 - 7.38 (m, 2H,  $\text{CH}_{\text{Ar}}$ ), 7.15 (d, 2H,  $^3J = 8.1$  Hz,  $\text{CH}_{\text{Ar}}$ ), 2.63 (q, 2H,  $^3J = 7.6$  Hz,  $\text{CH}_2$ ), 1.22 (t, 3H,  $^3J = 7.6$  Hz,  $\text{CH}_3$ ),  $^{13}\text{C}$  NMR (126 MHz,  $\text{CDCl}_3$ ):  $\delta$  (ppm): 175.43, 156.47, 155.03, 144.92, 134.78, 133.88, 129.39, 126.45, 125.60, 124.25, 123.17, 118.68, 118.16, 28.68, 15.55, MS (GC, 70 eV):  $m/z = 330$  ( $\text{M}^+$ , 46%), 279 (15), 249 (48), 235 (38), 210 (23), 195 (17), 167 (45), 149 (100), 115 (48), 105 (16), 89 (16), 71 (25), 57 (33), 43 (23), HRMS (TOF MS ES+): calcd for  $\text{C}_{17}\text{H}_{15}\text{O}_2\text{Se}$  ( $\text{M} + \text{H}$ ) $^+$  331.0237, found 331.0245.

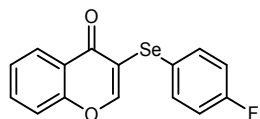

**3-(4-fluorophenylselanyl)-4H-chromen-4-one (12b):** brown powder, mp. 84-85 °C,  $^1\text{H}$  NMR (500 MHz,  $\text{CDCl}_3$ ):  $\delta$  (ppm): 8.23 (dd, 1H,  $^3J = 8.1$  Hz,  $^4J = 1.4$  Hz,  $\text{CH}_{\text{Ar}}$ ), 7.89 (s, 1H,  $\text{CH}_{\text{Ar}}$ ), 7.67 (ddd, 1H,  $^3J = 8.7$  Hz,  $^3J = 7.2$  Hz,  $^4J = 1.6$  Hz,  $\text{CH}_{\text{Ar}}$ ), 7.62 (dd, 2H,  $^3J = 8.8$  Hz,  $^3J = 5.4$  Hz,  $\text{CH}_{\text{Ar}}$ ), 7.47 - 7.37 (m, 2H,  $\text{CH}_{\text{Ar}}$ ), 7.00 (t, 2H,  $^3J = 8.7$  Hz,  $\text{CH}_{\text{Ar}}$ ),  $^{13}\text{C}$  NMR (126 MHz,  $\text{CDCl}_3$ ):  $\delta$  (ppm): 175.31, 163.09 (d,  $^1J_{\text{CF}} = 248.5$  Hz,  $\text{C}_{\text{ipso-F}}$ ), 156.47, 155.68, 136.55 (d,  $J_{\text{CF}} = 8.1$  Hz), 134.04, 126.46, 125.76, 123.26, 122.64 (d,  $J_{\text{CF}} = 3.4$  Hz), 118.21, 118.17,

116.90 (d,  $^2J_{CF} = 21.7$  Hz),  $^{19}\text{F}\{^1\text{H}\}$  NMR (188.34 MHz,  $\text{CDCl}_3$ ):  $\delta$  (ppm): -112.24 (CF), MS (GC, 70 eV):  $m/z = 320$  ( $\text{M}^+$ , 79%), 239 (56), 200 (51), 183 (16), 120 (100), 92 (47), 75 (16), 63 (25), HRMS (TOF MS ES+): calcd for  $\text{C}_{15}\text{H}_{10}\text{FO}_2\text{Se}$  ( $\text{M} + \text{H}$ ) $^+$  320.9830, found 320.9837.

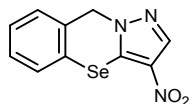

**3-nitro-9H-pyrazolo[5,1-b][1,3]benzoselenazine (13a)**: green powder, mp. 195-196 °C,  $^1\text{H}$  NMR (500 MHz,  $\text{CDCl}_3$ ): 8.18 (s, 1H, C(2)), 7.55 - 7.53 (m, 1H,  $\text{CH}_{\text{Ar}}$ ), 7.37 - 7.34 (m, 3H,  $\text{CH}_{\text{Ar}}$ ), 5.27 (s, 2H,  $\text{CH}_2$ ),  $^{13}\text{C}$  NMR (126 MHz,  $\text{CDCl}_3$ ):  $\delta$  (ppm): 136.55, 131.06, 130.33, 129.43, 129.05, 128.94, 128.37, 125.09, 53.97, MS (GC, 70 eV):  $m/z = 281$  ( $\text{M}^+$ , 100%), 235 (10), 206 (10), 169 (22), 155 (44), 126 (20), 115 (33), 105 (17), 89 (32), 77 (14), 63 (17), HRMS (TOF MS ES+): calcd for  $\text{C}_{10}\text{H}_8\text{N}_3\text{O}_2\text{Se}$  ( $\text{M} + \text{H}$ ) $^+$  281.9782, found 281.9785.

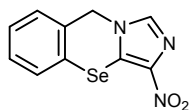

**3-nitro-9H-imidazo[5,1-b][1,3]benzoselenazine (13b)**: yellow powder, mp. 228-229 °C,  $^1\text{H}$  NMR (500 MHz,  $\text{DMSO-d}_6$ ): 8.16 (s, 1H, C(2)), 7.78 - 7.75 (m, 1H,  $\text{CH}_{\text{Ar}}$ ), 7.52 - 7.50 (m, 1H,  $\text{CH}_{\text{Ar}}$ ), 7.42 - 7.37 (m, 2H,  $\text{CH}_{\text{Ar}}$ ), 5.31 (s, 2H,  $\text{CH}_2$ ),  $^{13}\text{C}$  NMR (126 MHz,  $\text{DMSO-d}_6$ ):  $\delta$  (ppm): 144.87, 138.03, 131.33, 129.55, 129.13, 129.01, 128.06, 125.78, 123.28, 48.85, MS (GC, 70 eV):  $m/z = 281$  ( $\text{M}^+$ , 100%), 235 (20), 208 (58), 196 (10), 181 (23), 169 (54), 155 (17), 128 (18), 116 (17), 89 (50), 77 (11), 63 (21), HRMS (TOF MS ES+): calcd for  $\text{C}_{10}\text{H}_8\text{N}_3\text{O}_2\text{Se}$  ( $\text{M} + \text{H}$ ) $^+$  281.9782, found 281.9785.

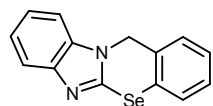

**12H-benzimidazo[2,1-b][1,3]benzoselenazine (13c)**: colorless crystals, mp. 174-175 °C,  $^1\text{H}$  NMR (500 MHz,  $\text{CDCl}_3$ ): 7.70 (s, 1H,  $\text{CH}_{\text{Ar}}$ ), 7.46 - 7.21 (m, 7H,  $\text{CH}_{\text{Ar}}$ ), 5.09 (s, 2H,  $\text{CH}_2$ ),  $^{13}\text{C}$  NMR (126 MHz,  $\text{CDCl}_3$ ):  $\delta$  (ppm): 144.45, 143.24, 135.03, 131.96, 129.81, 128.82, 128.42, 127.47, 126.94, 122.32, 122.10, 118.81, 108.48, 47.92, MS (GC, 70 eV):  $m/z = 286$  ( $\text{M}^+$ , 41%), 206 (100), 103 (10), 77 (12), HRMS (TOF MS ES+): calcd for  $\text{C}_{14}\text{H}_{11}\text{N}_2\text{Se}$  ( $\text{M} + \text{H}$ ) $^+$  287.0087, found 287.0092.

## References

- 1 V. O. Iaroshenko, A. Gevorgyan, O. Davydova, A. Villinger and P. Langer, *J. Org. Chem.*, 2014, **79**, 2906–2915.
- 2 Y. P. Ustimenko, A. M. Agafontsev, V. Y. Komarov and A. V. Tkachev, *Mendeleev Commun.*, 2018, **28**, 584–586.
- 3 V. O. Iaroshenko, A. Gevorgyan, S. Mkrtchyan, K. Arakelyan, T. Grigoryan, J. Yedoyan, A. Villinger and P. Langer, *J. Org. Chem.*, 2015, **80**, 2103–2119.
- 4 E. Apohan, U. Yilmaz, O. Yilmaz, A. Serindag, H. Küçükbay, O. Yesilada and Y. Baran, *J. Organomet. Chem.*, 2017, **828**, 52–58.
- 5 C. Ding, Y. Yu, Q. Yu, Z. Xie, Y. Zhou, J. Zhou, G. Liang and Z. Song, *ChemCatChem*, 2018, **10**, 5397–5401.
- 6 C. P. Owen, I. Shahid, M. S. Olusanjo, C. H. Patel, S. Dhanani and S. Ahmed, *J. Steroid Biochem. Mol. Biol.*, 2008, **111**, 117–127.
- 7 A. M. Linsenmeier, C. M. Williams and S. Bräse, *J. Org. Chem.*, 2011, **76**, 9127–9132.

**(C) Copies  $^1\text{H}$  and  $^{13}\text{C}$  NMR spectra.**

Compound **sm3**

8.077  
7.323  
7.309  
7.294  
7.260  
7.224  
7.172  
7.158

4.143

2.653

2.261

s. mkrtyan mj-1011031H.stan CDCl3

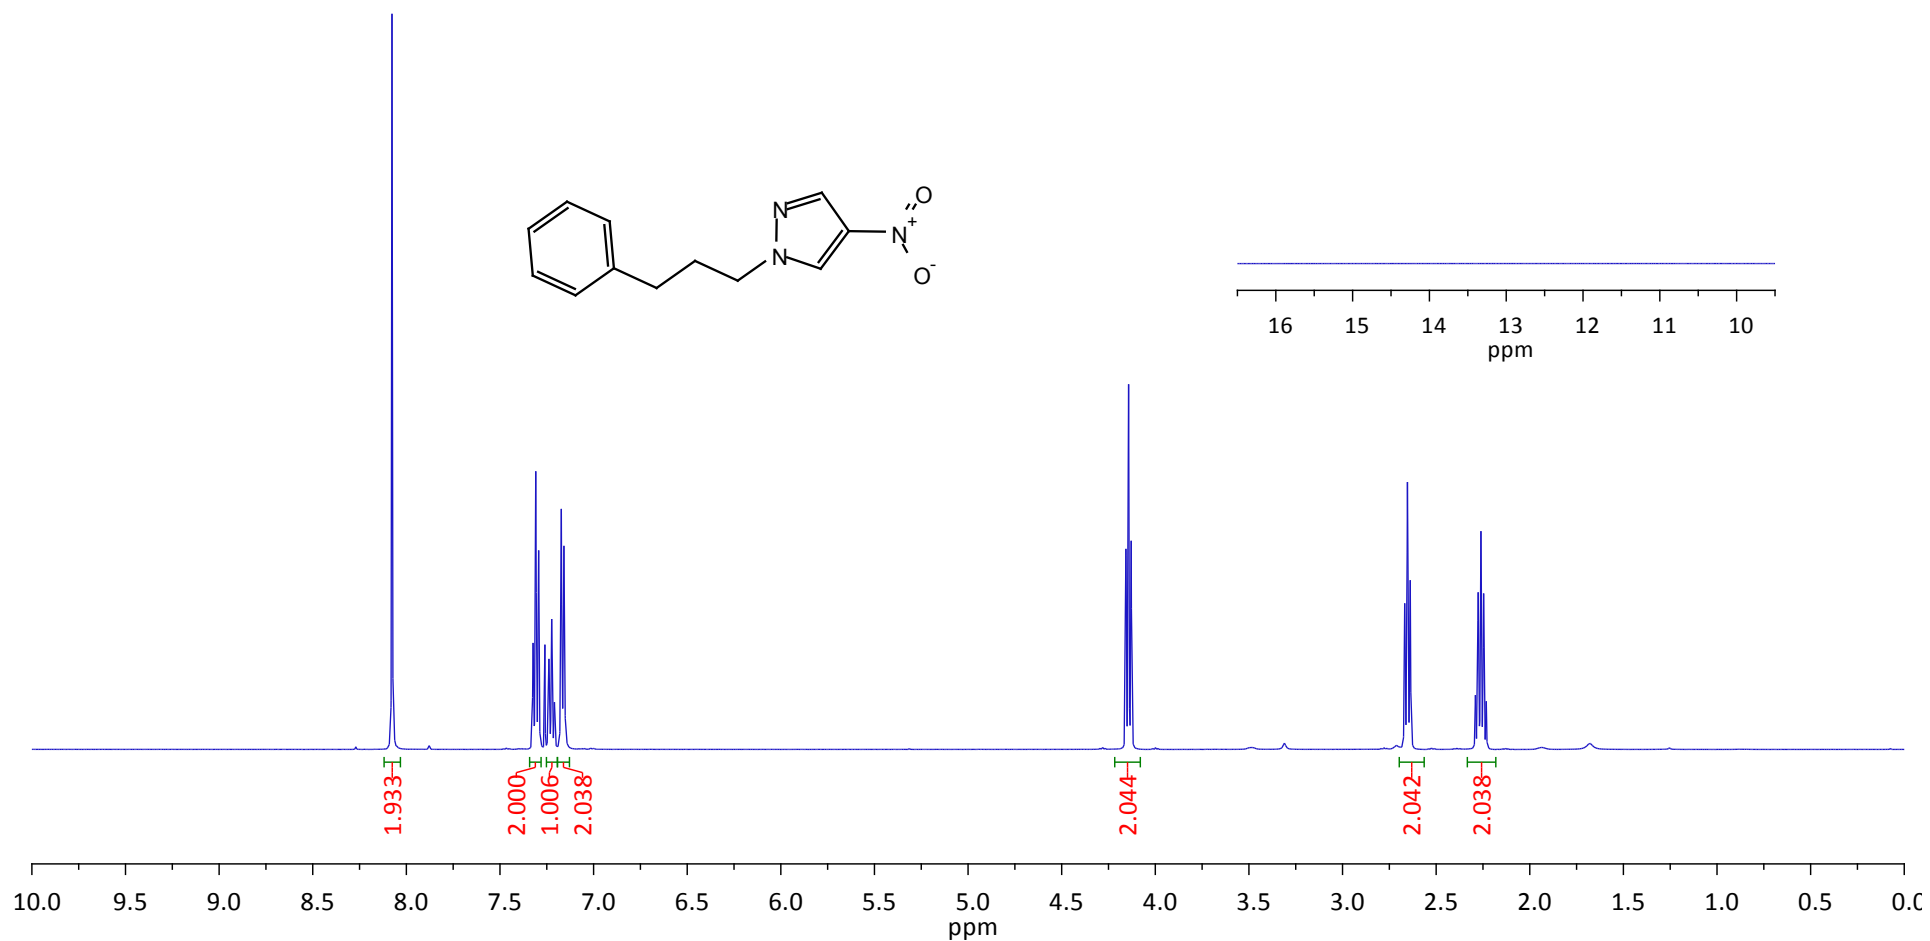

Comment s. mkrtyan mj-1011031H.stan CDCl3  
 Number of Scans 24  
 Spectrometer Frequency 500.13  
 Spectral Width 12335.5  
 Spectral Size 65536

Compound **sm3**

s. mkrtyan mj-101103A-13C.stan CDCl3

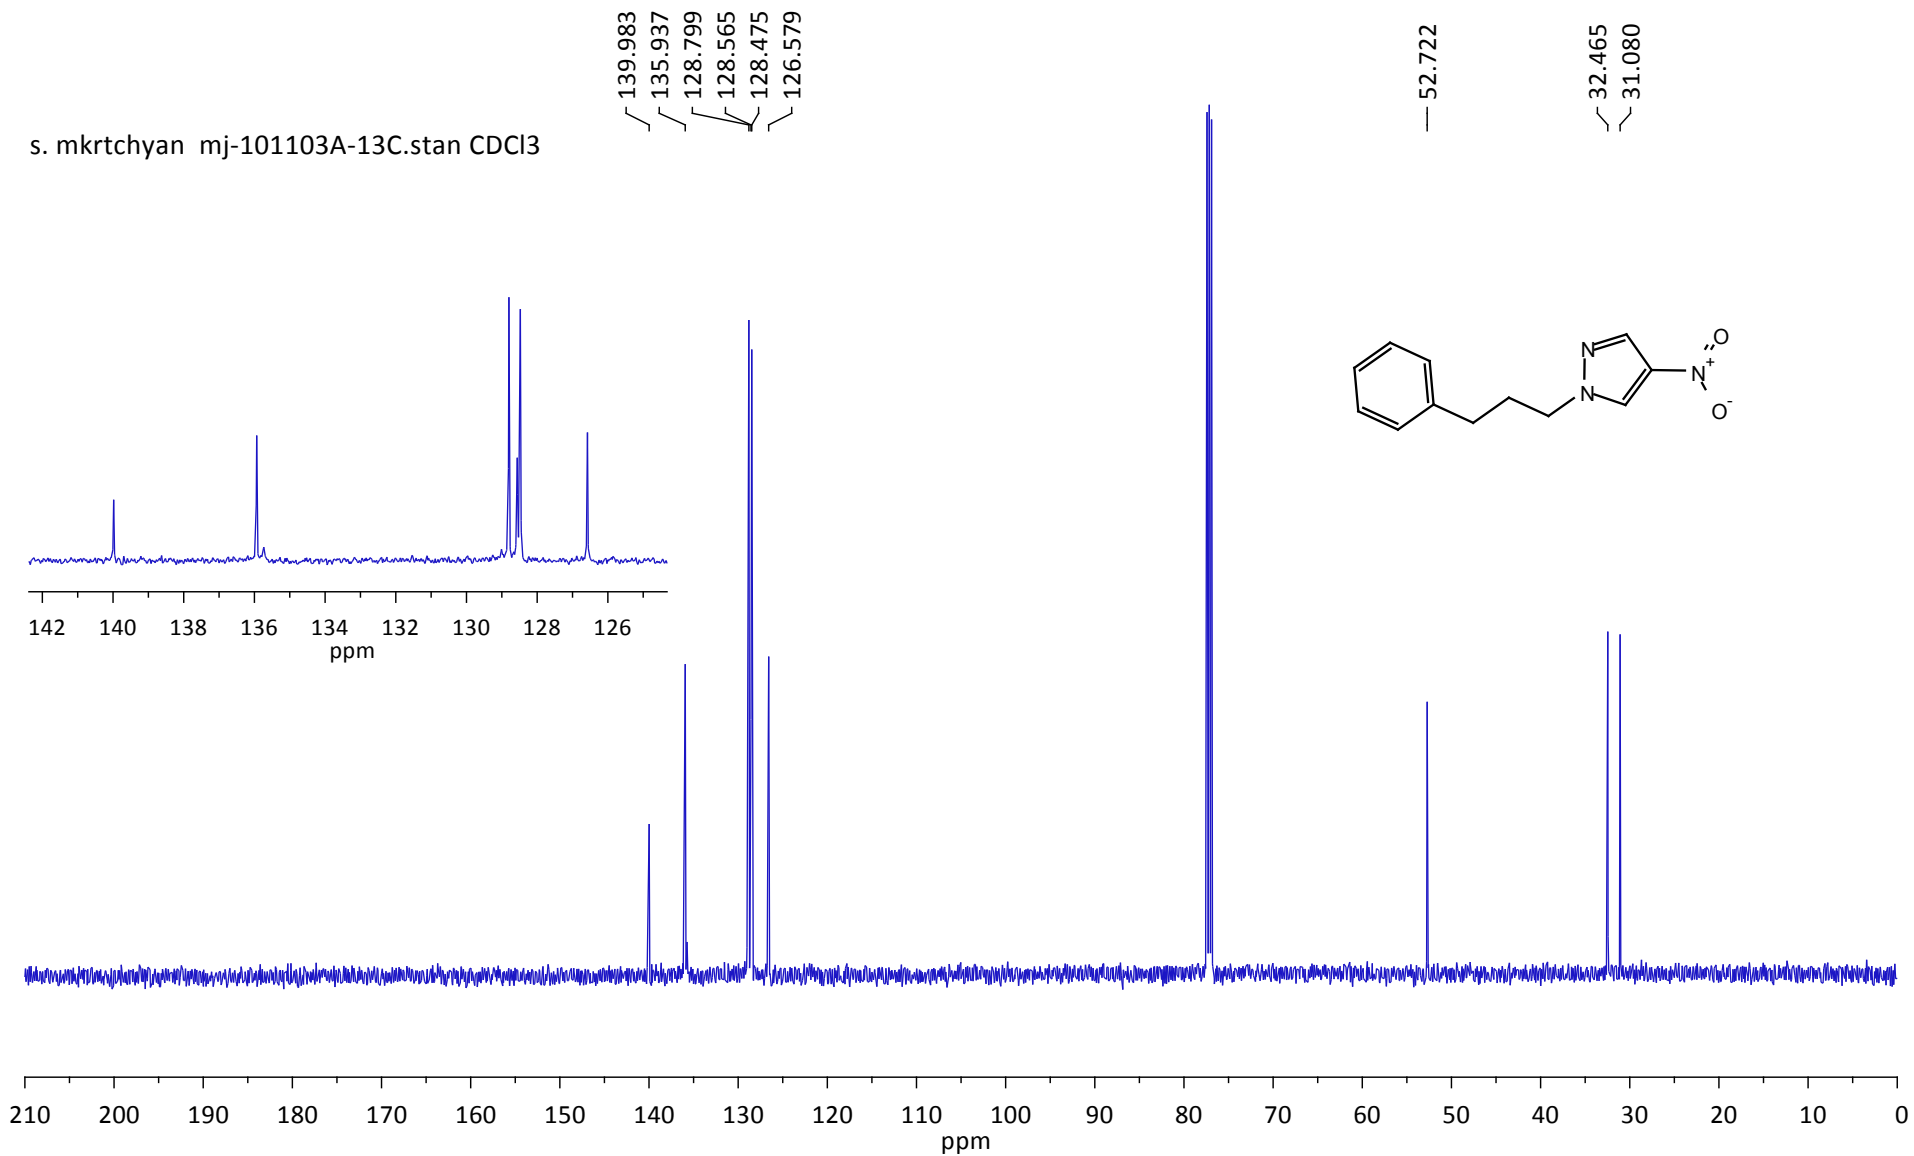

Comment s. mkrtyan mj-101103A-13C.stan CDCl3  
Number of Scans 512  
Spectrometer Frequency 125.76  
Spectral Width 36057.7  
Spectral Size 65536



Compound **sm6**

7.702  
7.473  
7.230  
7.215  
7.140  
7.124

5.121

2.371

s. mkrtyan =mj-137=1H.stan CDCl3

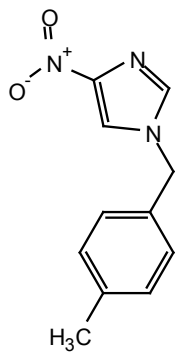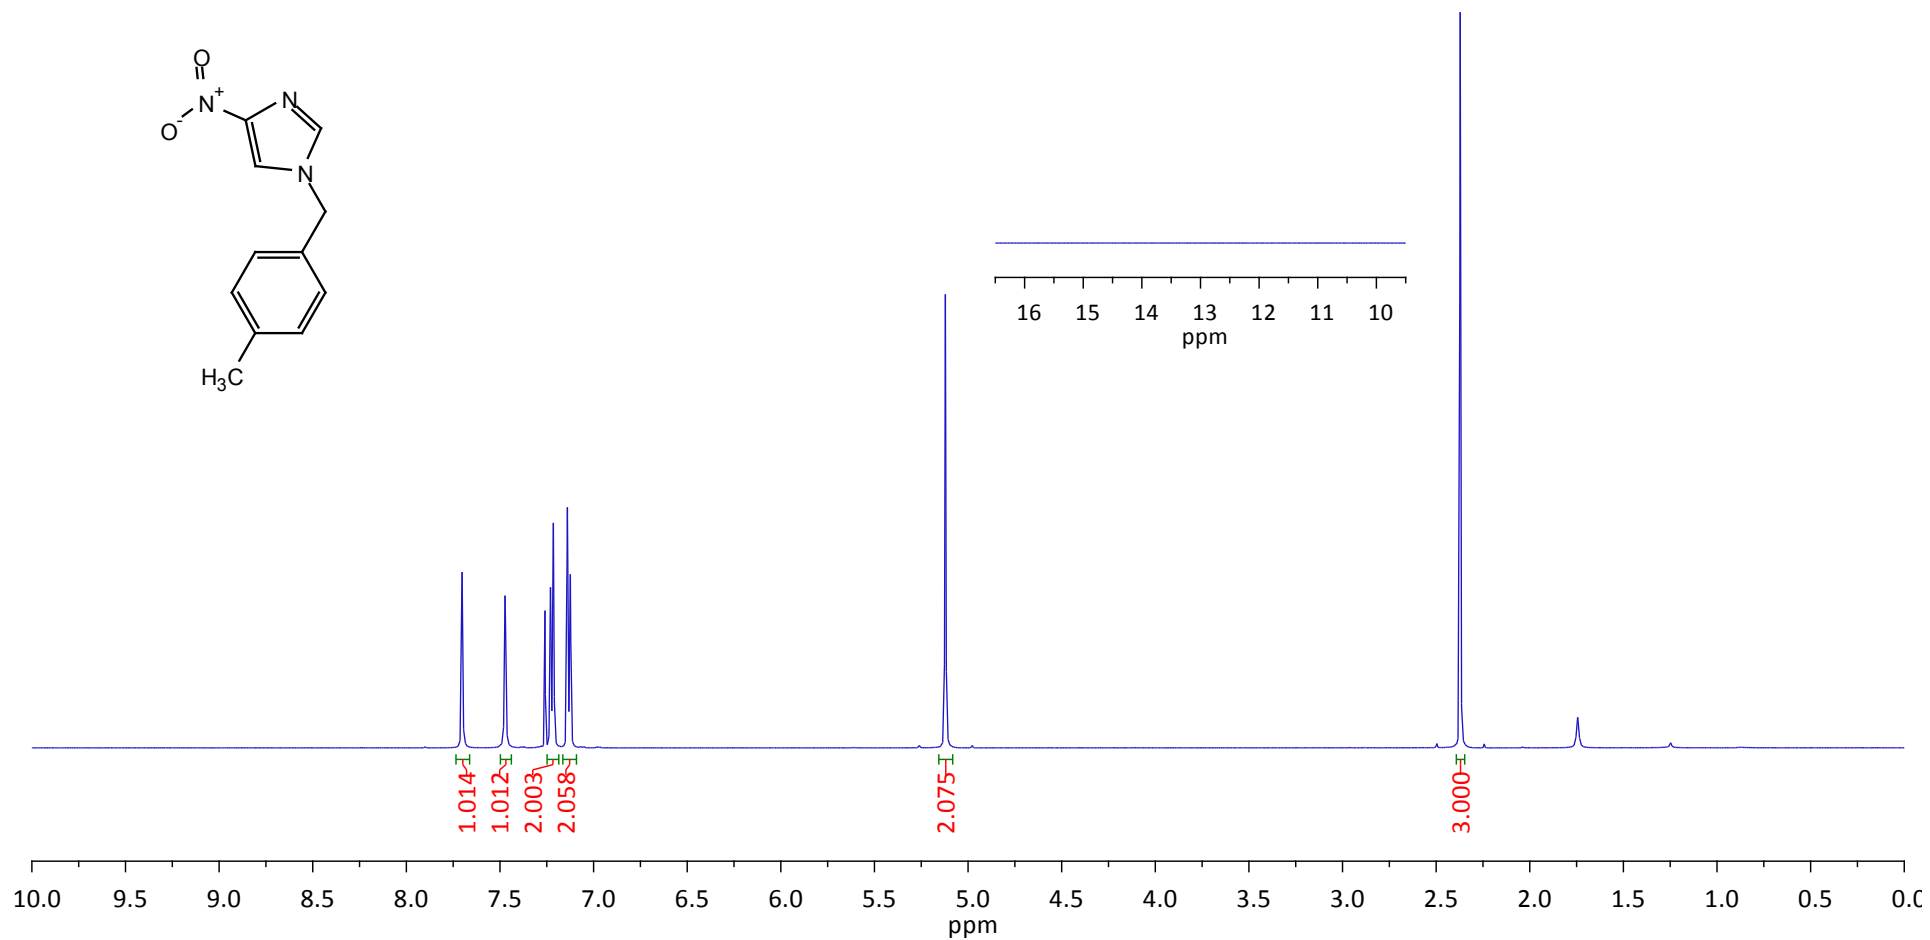

Comment s. mkrtyan =mj-137=1H.stan CDCl3  
Number of Scans 24  
Spectrometer Frequency 500.13  
Spectral Width 12335.5  
Spectral Size 65536

Compound **sm6**

s. mkrtyan =mj-137=A-13C.stan CDCl3

139.551  
136.034  
130.653  
130.287  
128.116

119.378

52.169

21.314

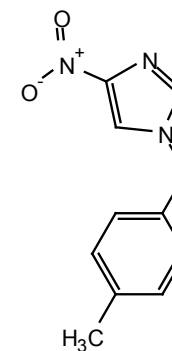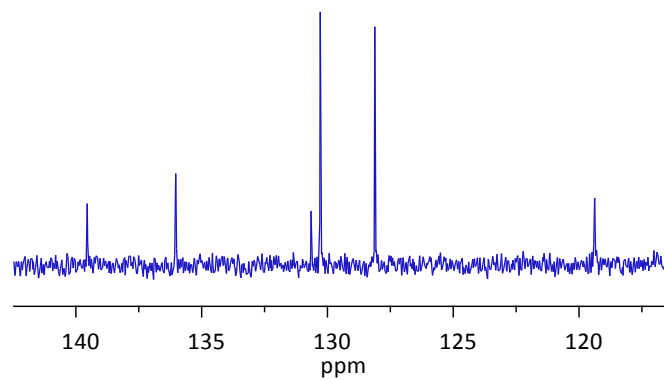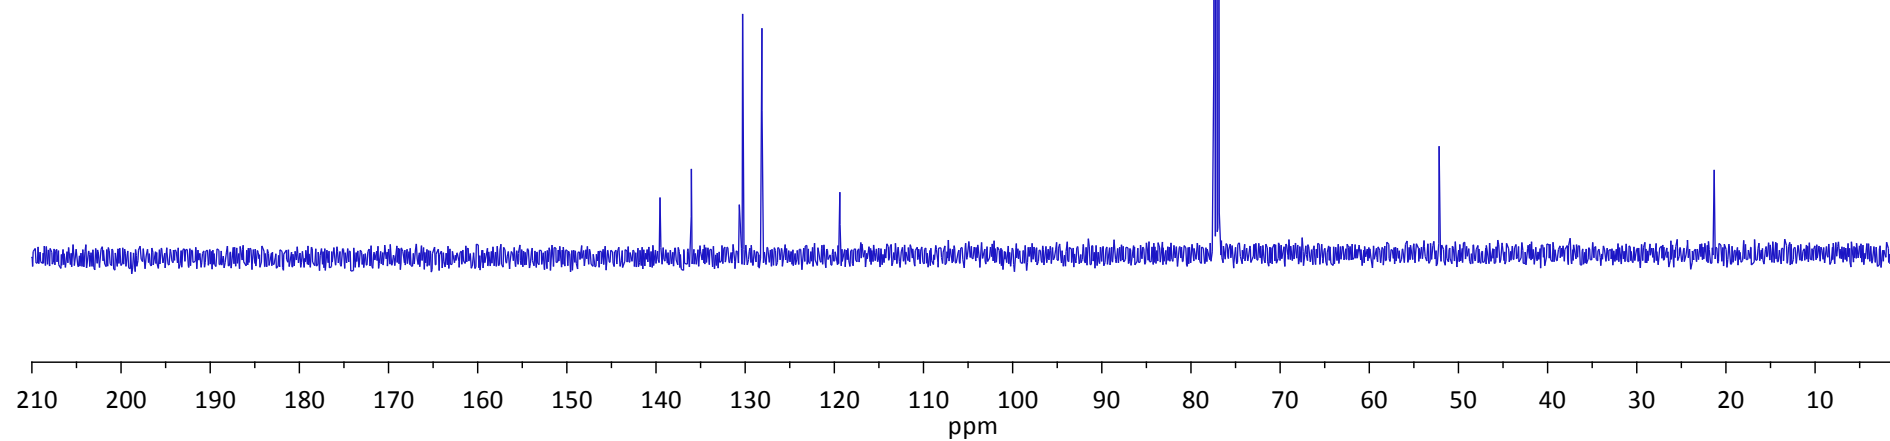

|                        |                                     |
|------------------------|-------------------------------------|
| Comment                | s. mkrtyan =mj-137=A-13C.stan CDCl3 |
| Number of Scans        | 256                                 |
| Spectrometer Frequency | 125.76                              |
| Spectral Width         | 36057.7                             |
| Spectral Size          | 65536                               |

Compound **sm8**

7.752  
7.401  
7.399  
7.260  
7.239  
7.154  
7.140

4.008  
3.993

2.674

2.209

s. mkrtyan =mj-136-516=1H.stan CDCl3

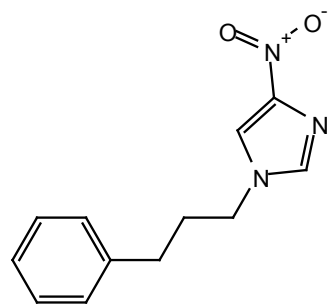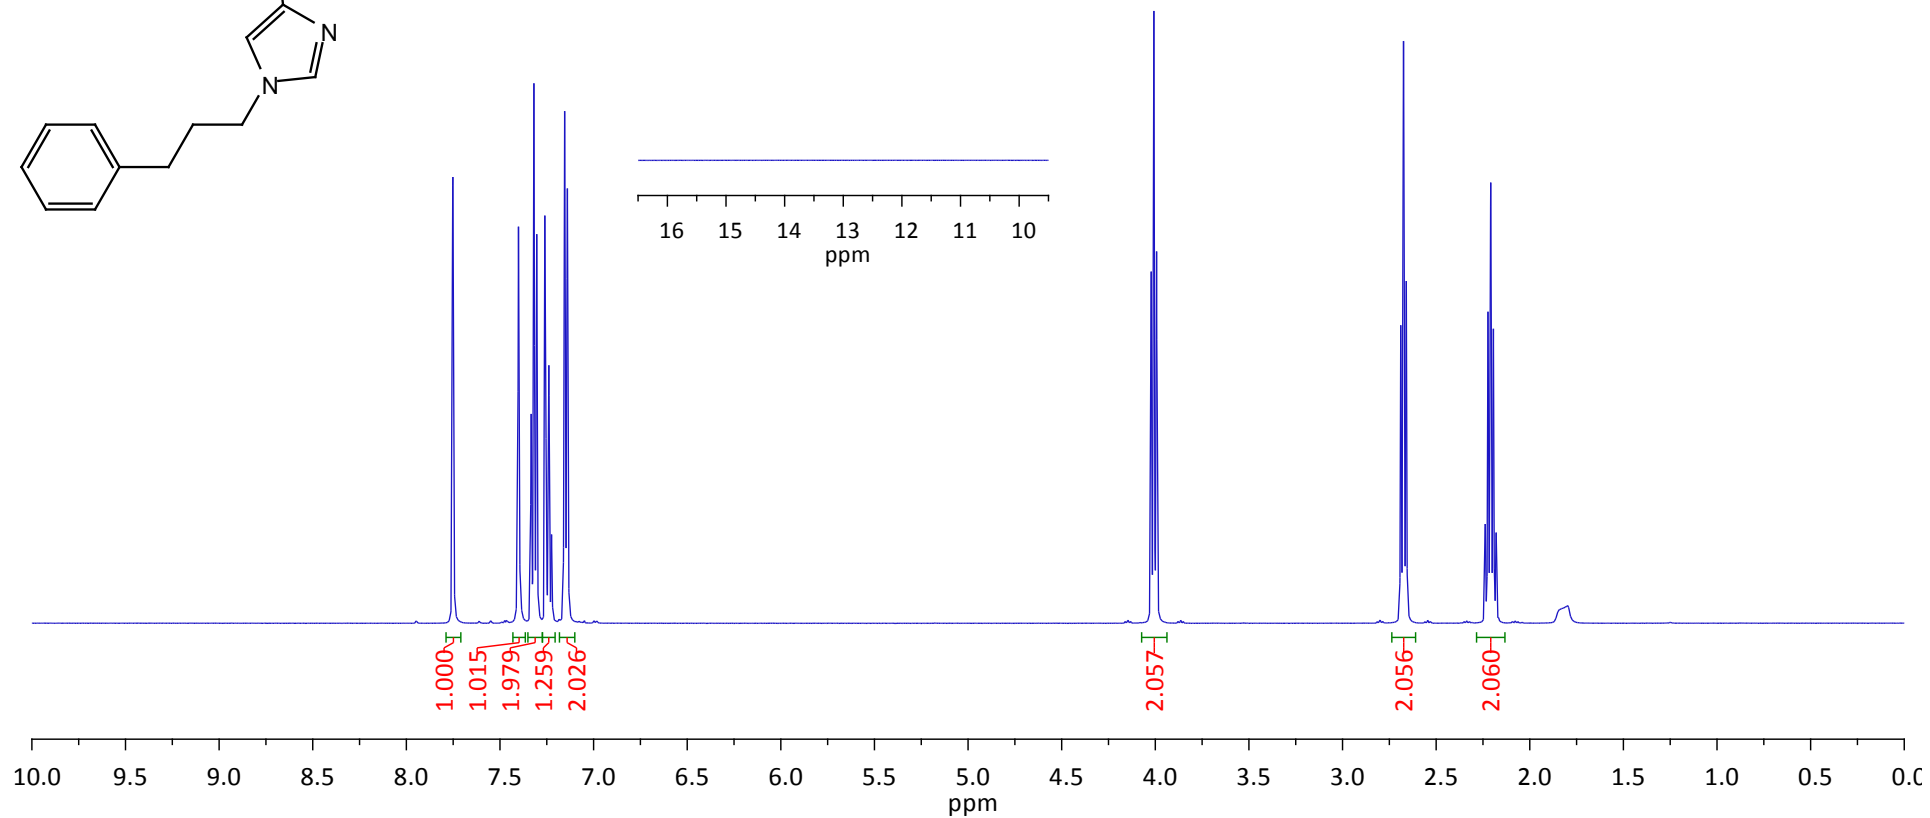

Comment s. mkrtyan =mj-136-516=1H.stan CDCl3  
 Number of Scans 24  
 Spectrometer Frequency 500.13  
 Spectral Width 12335.5  
 Spectral Size 65536

Compound **sm8**

s. mkrtychyan =mj-136-516=A-13C.stan CDCl3

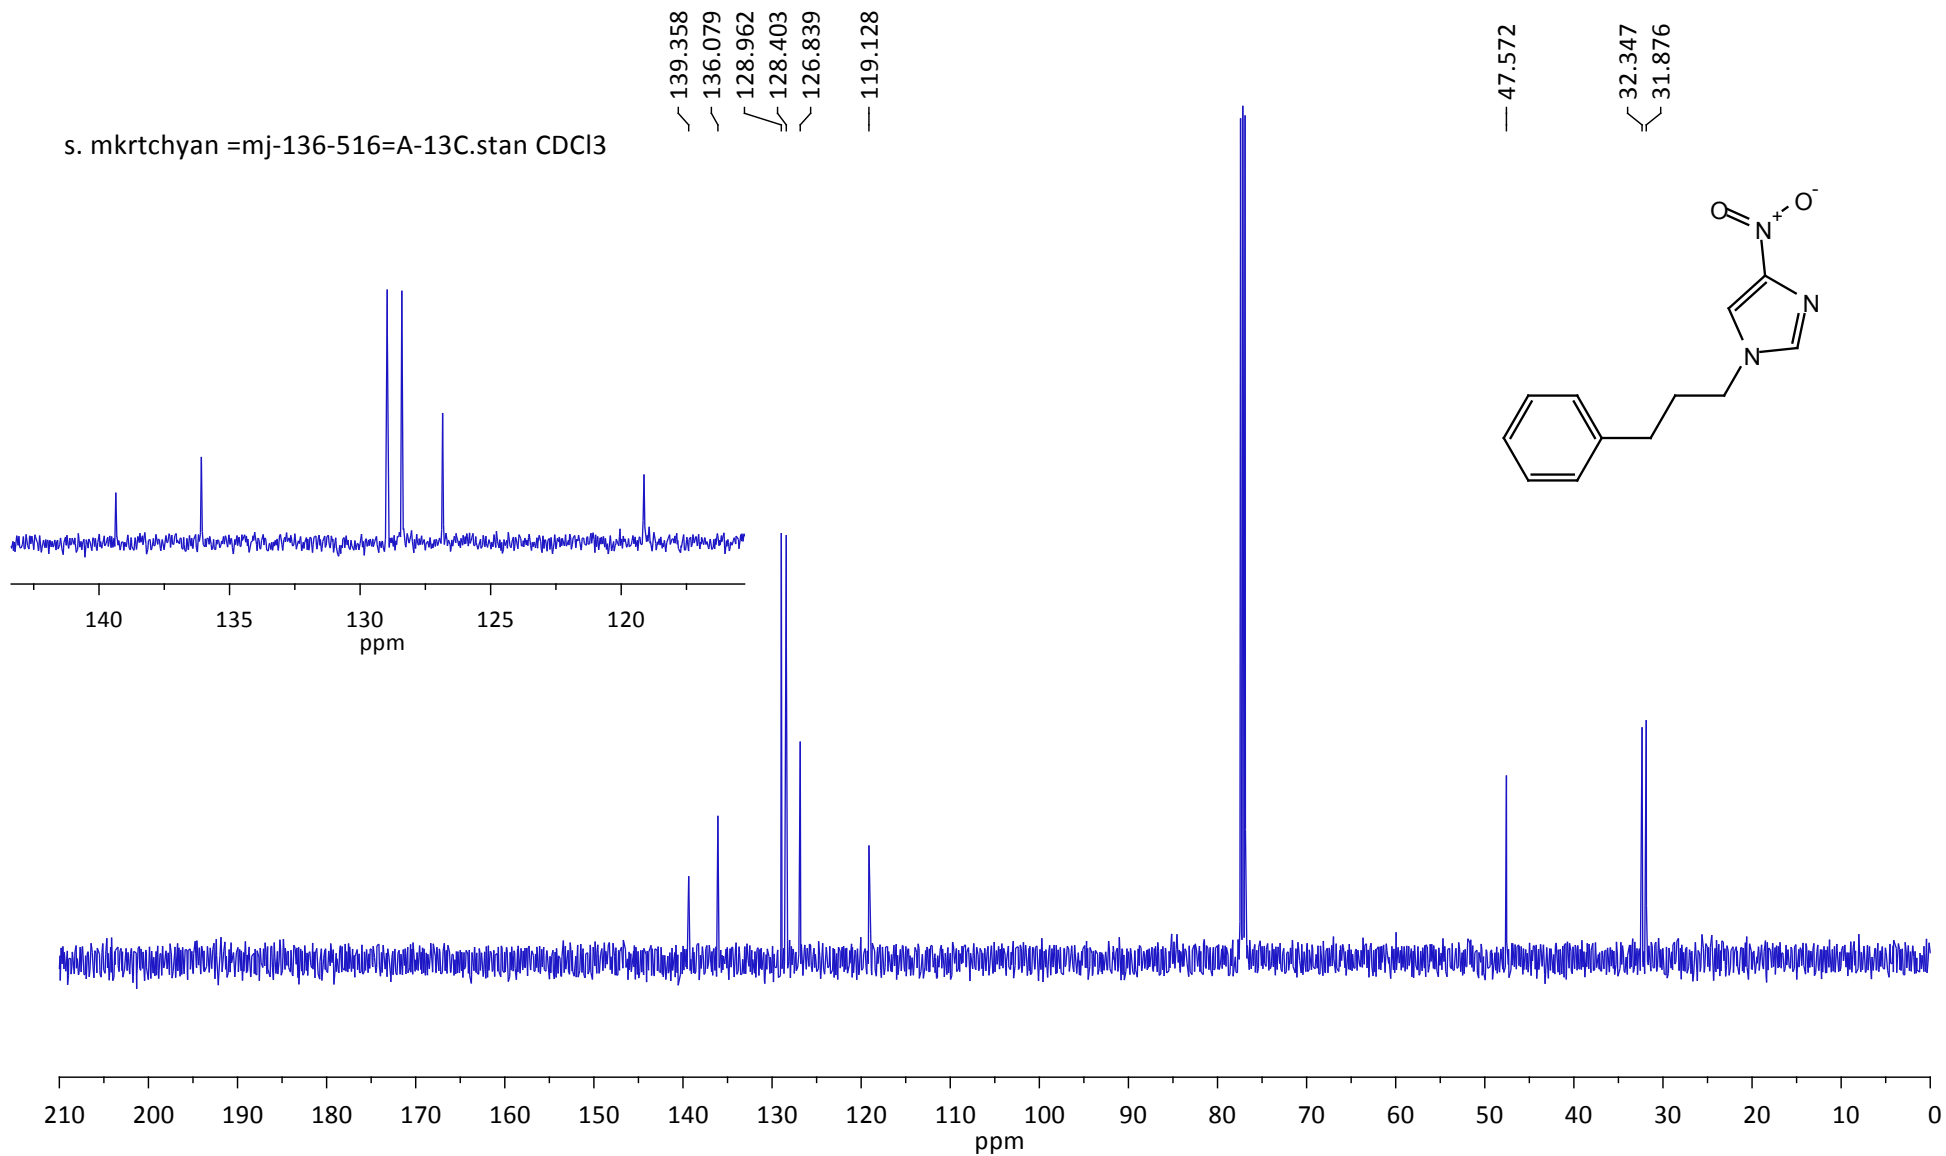

|                        |                                            |
|------------------------|--------------------------------------------|
| Comment                | s. mkrtychyan =mj-136-516=A-13C.stan CDCl3 |
| Number of Scans        | 128                                        |
| Spectrometer Frequency | 125.76                                     |
| Spectral Width         | 36057.7                                    |
| Spectral Size          | 65536                                      |

Compound **sm13**

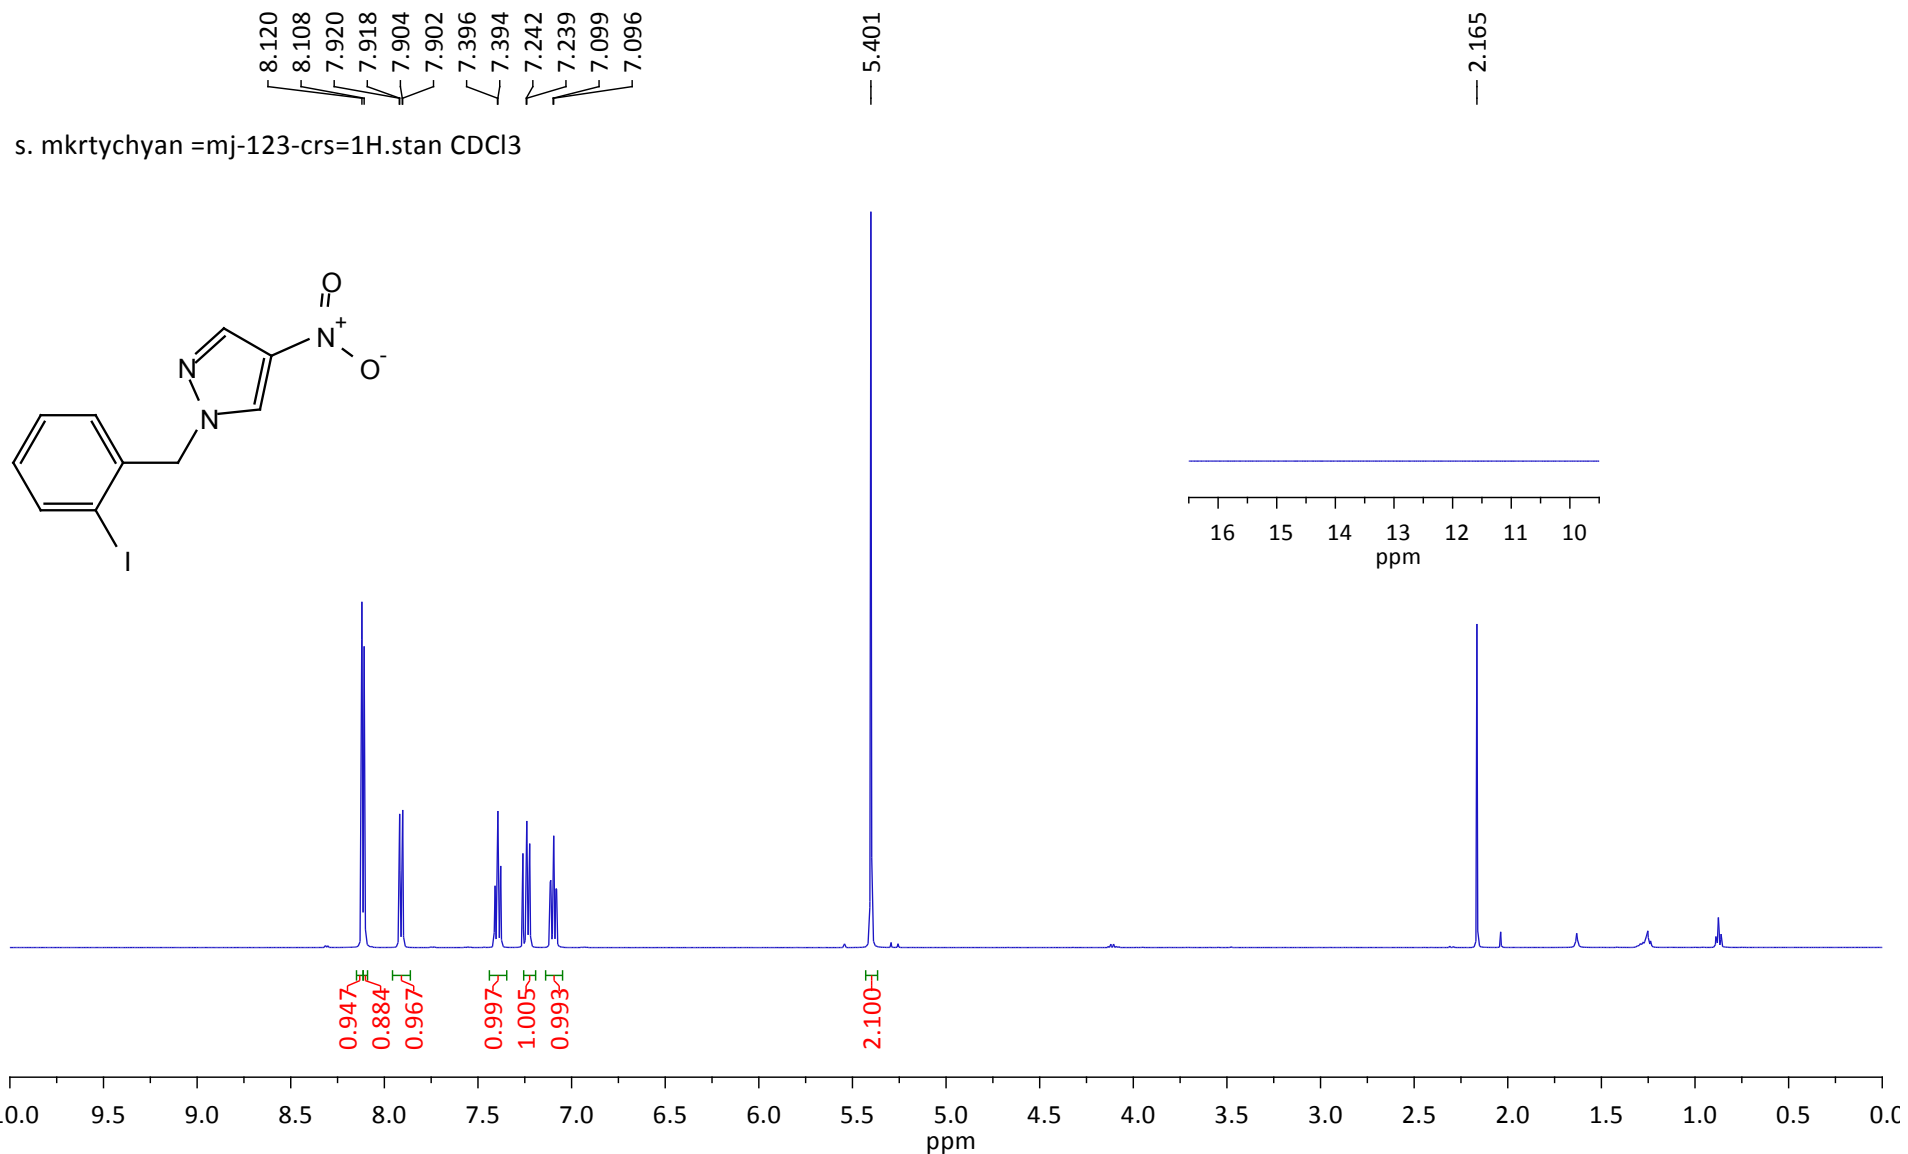

Comment s. mkrtychyan =mj-123-crs=1H.stan CDCl3  
 Number of Scans 24  
 Spectrometer Frequency 500.13  
 Spectral Width 12335.5  
 Spectral Size 65536

Compound **sm13**

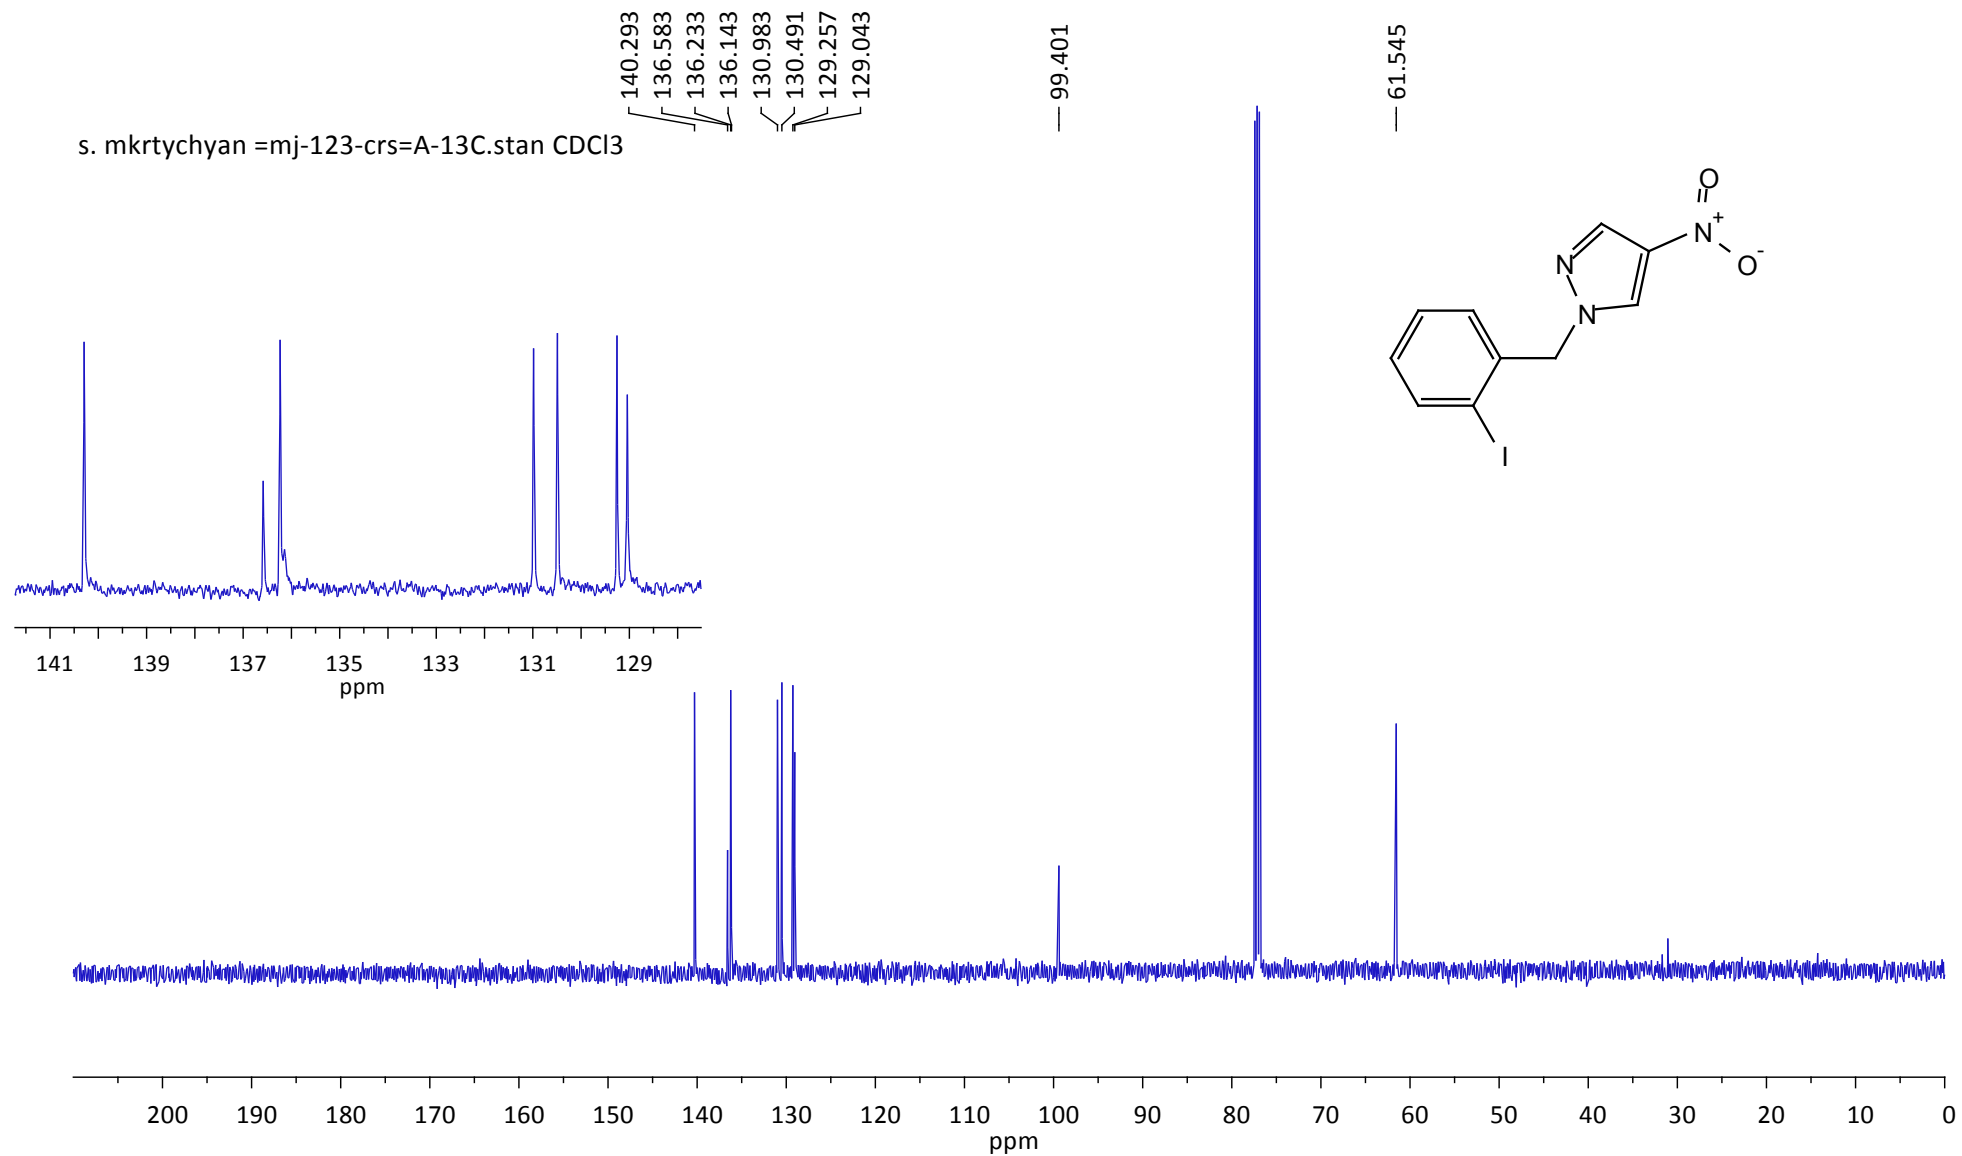

|                        |                                                        |
|------------------------|--------------------------------------------------------|
| Comment                | s. mkrtychyan =mj-123-crs=A-13C.stan CDCl <sub>3</sub> |
| Number of Scans        | 224                                                    |
| Spectrometer Frequency | 125.76                                                 |
| Spectral Width         | 36057.7                                                |
| Spectral Size          | 65536                                                  |

Compound **sm14**

7.826  
7.735  
7.515  
7.349  
7.338  
7.260  
7.201  
7.188  
7.044  
7.032

5.233

s. mkrtyan =mja-140-crs1=1H.stan CDCl3

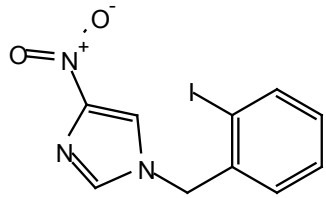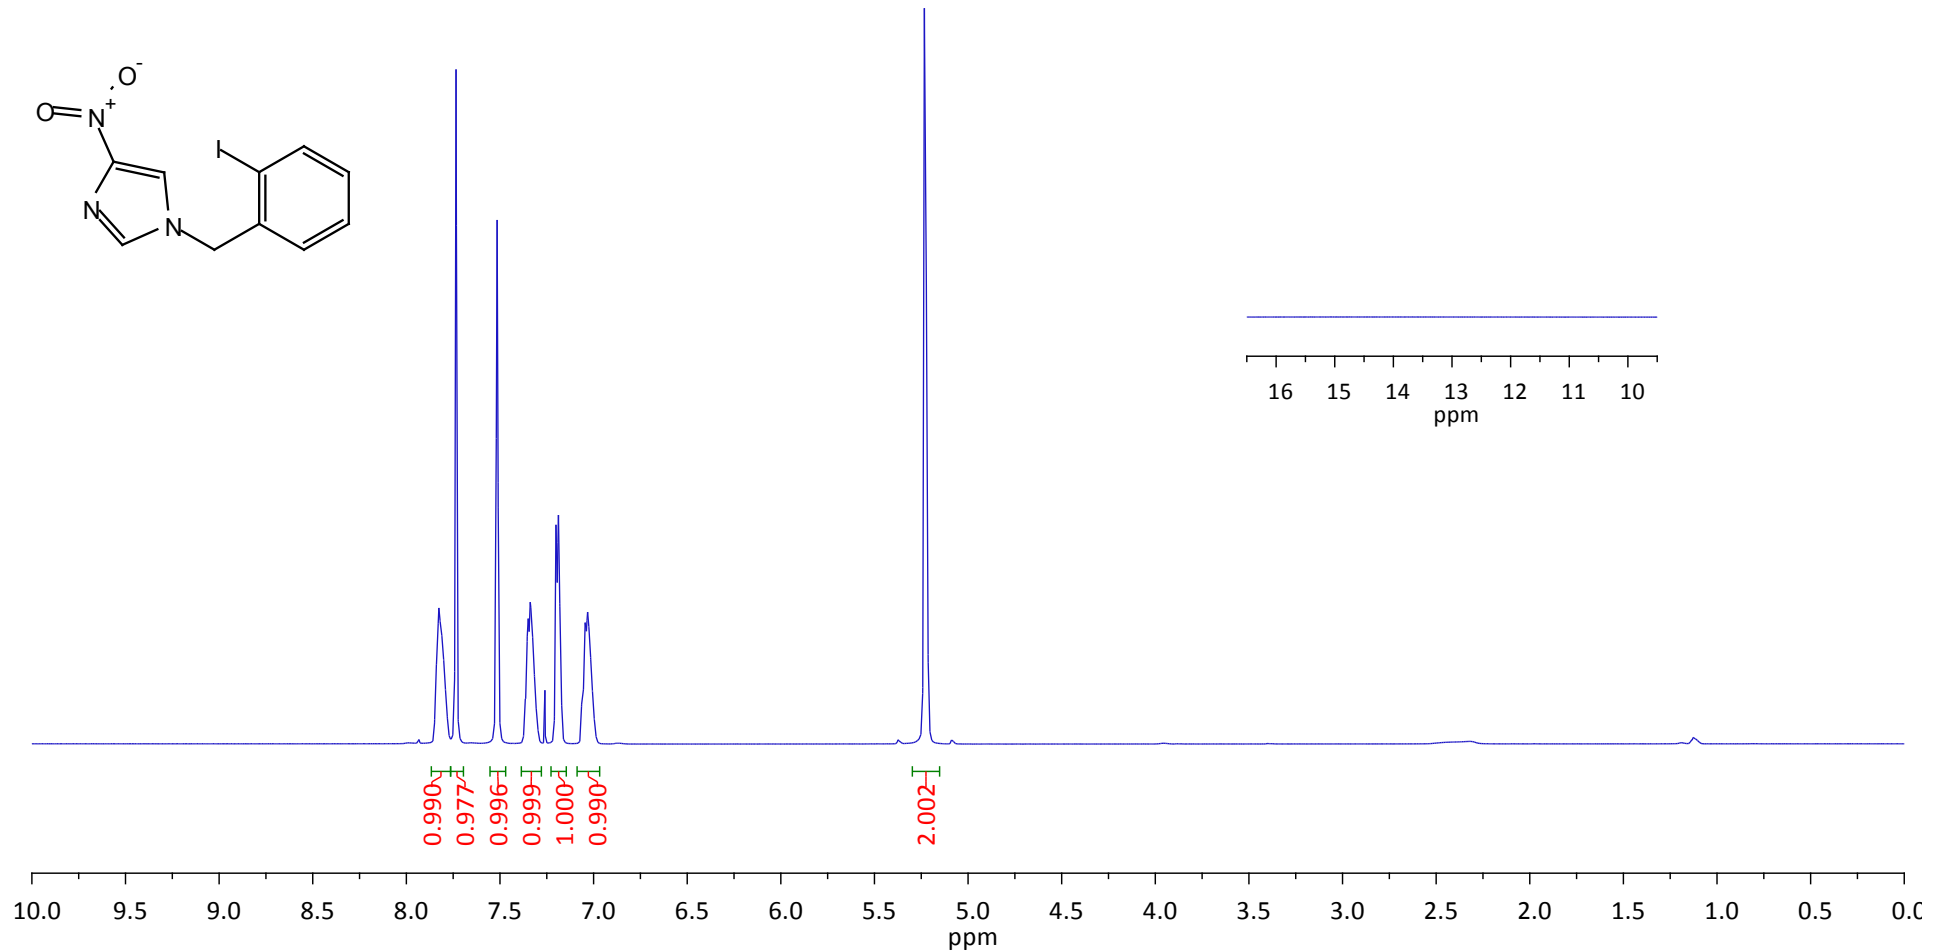

Comment s. mkrtyan =mja-140-crs1=1H.stan CDCl3  
Number of Scans 24  
Spectrometer Frequency 500.13  
Spectral Width 12335.5  
Spectral Size 65536

Compound **sm14**

s. mkrtyan =mja-140-crs1=A-13C.stan CDCl3

147.870  
140.219  
136.533  
136.210  
130.940  
130.019  
129.258

119.685

99.164

56.344

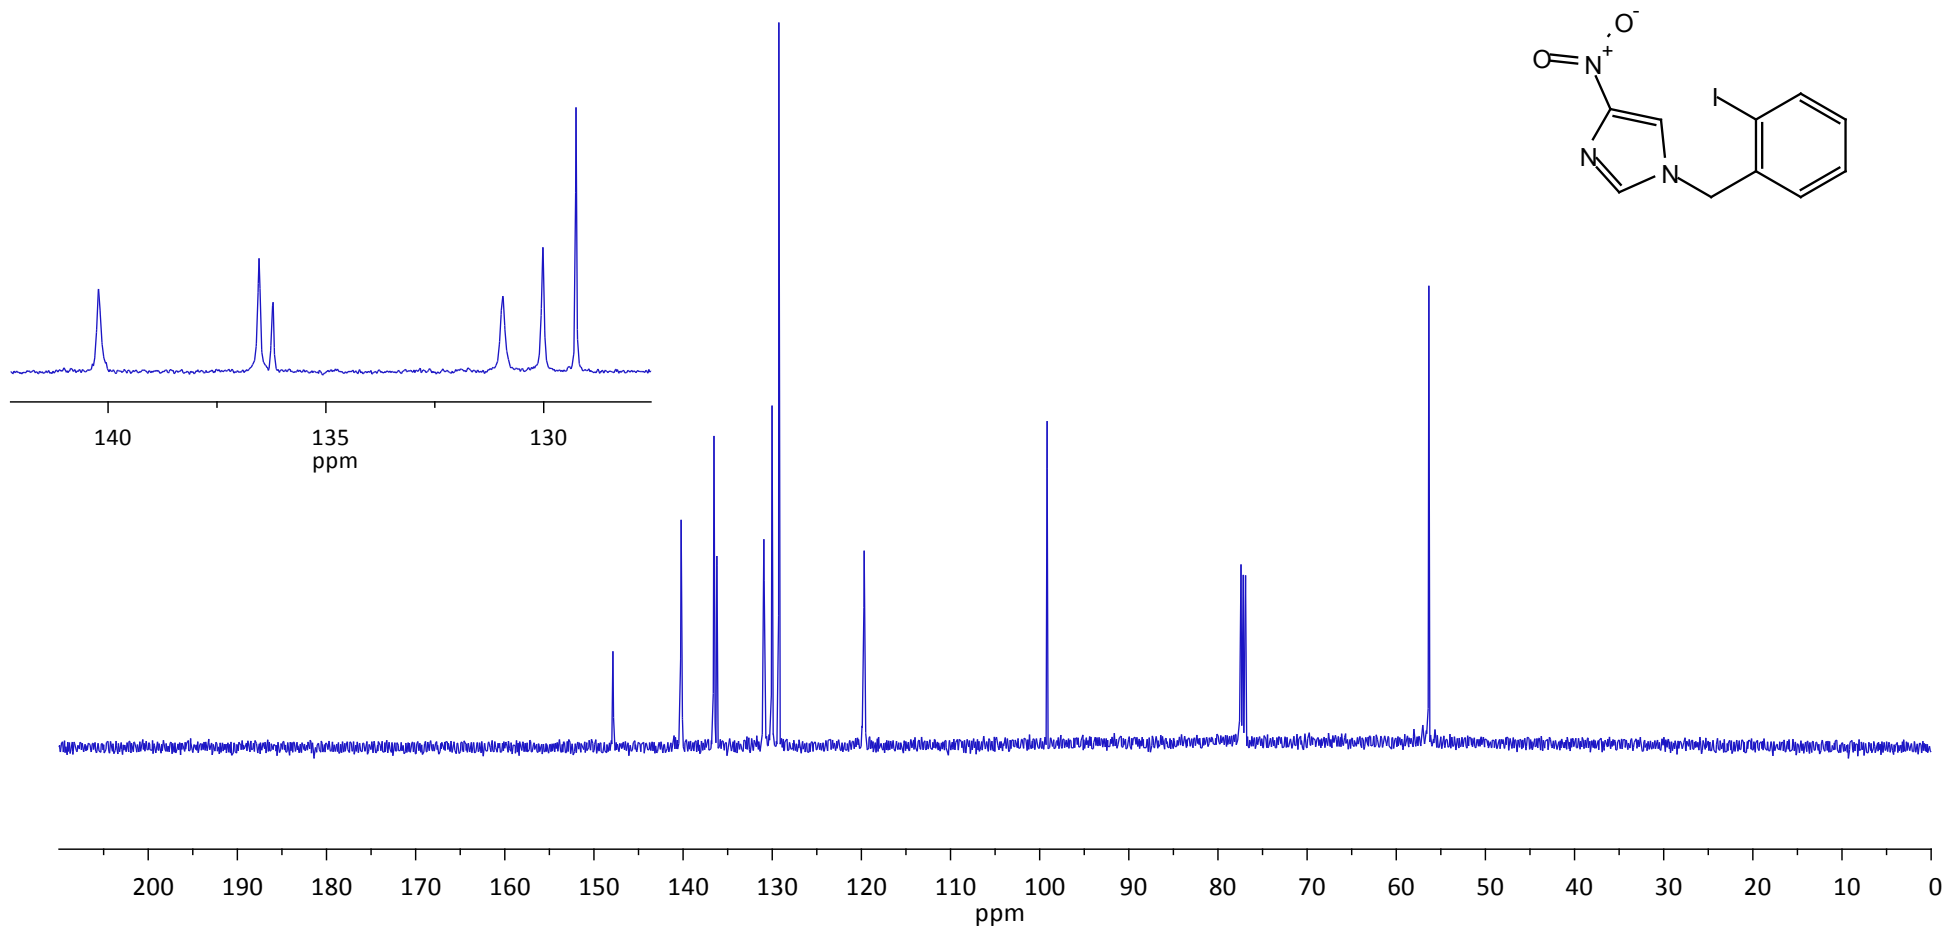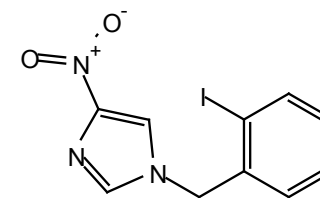

|                        |                                           |
|------------------------|-------------------------------------------|
| Comment                | s. mkrtyan =mja-140-crs1=A-13C.stan CDCl3 |
| Number of Scans        | 512                                       |
| Spectrometer Frequency | 125.76                                    |
| Spectral Width         | 36057.7                                   |
| Spectral Size          | 65536                                     |



Compound **1a**

s. mkrtyan =mj-50-2833=  
1H.stan CDCl3

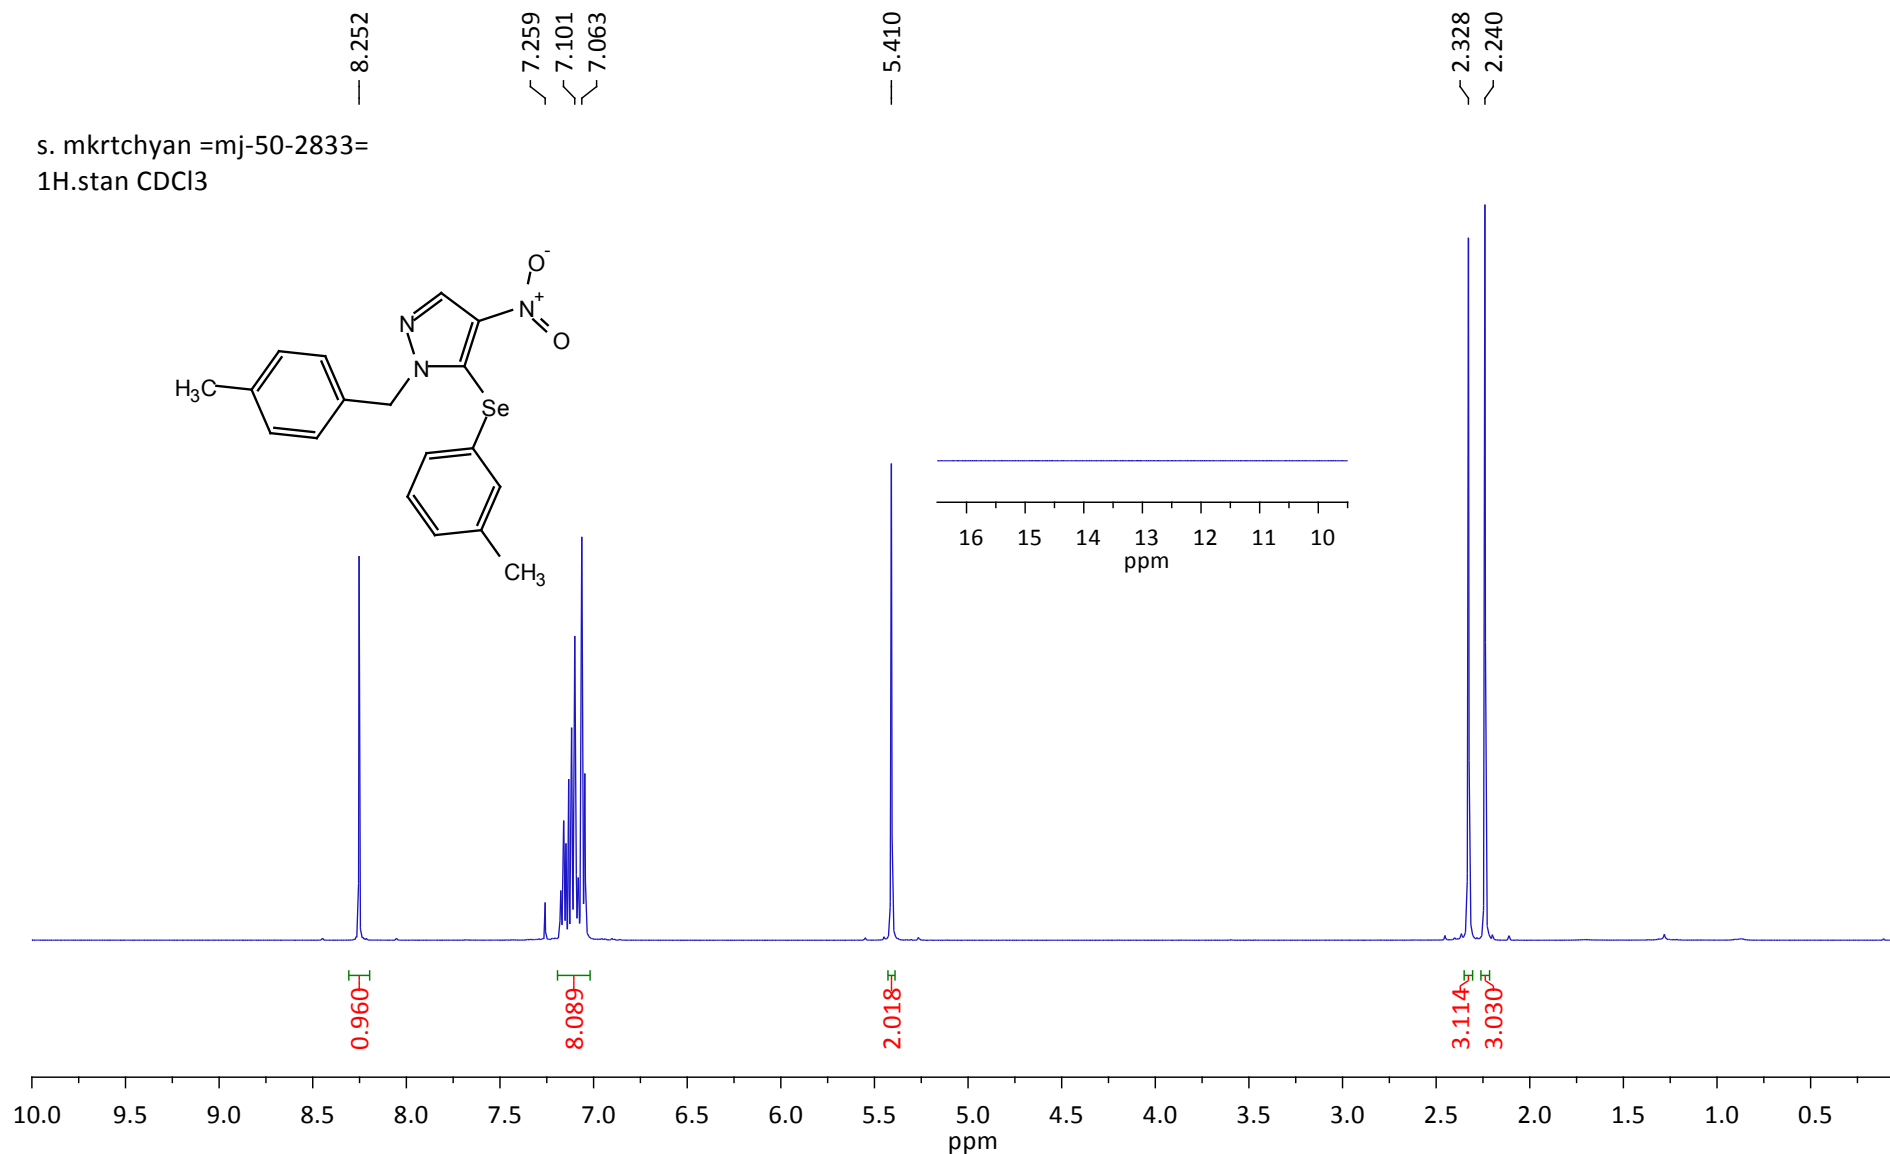

|                        |                                      |
|------------------------|--------------------------------------|
| Comment                | s. mkrtyan =mj-50-2833=1H.stan CDCl3 |
| Number of Scans        | 24                                   |
| Spectrometer Frequency | 500.13                               |
| Spectral Width         | 12335.5                              |
| Spectral Size          | 65536                                |

Compound 1a

s. mkrtyan =mj-50-2833=A-13C.stan CDCl3

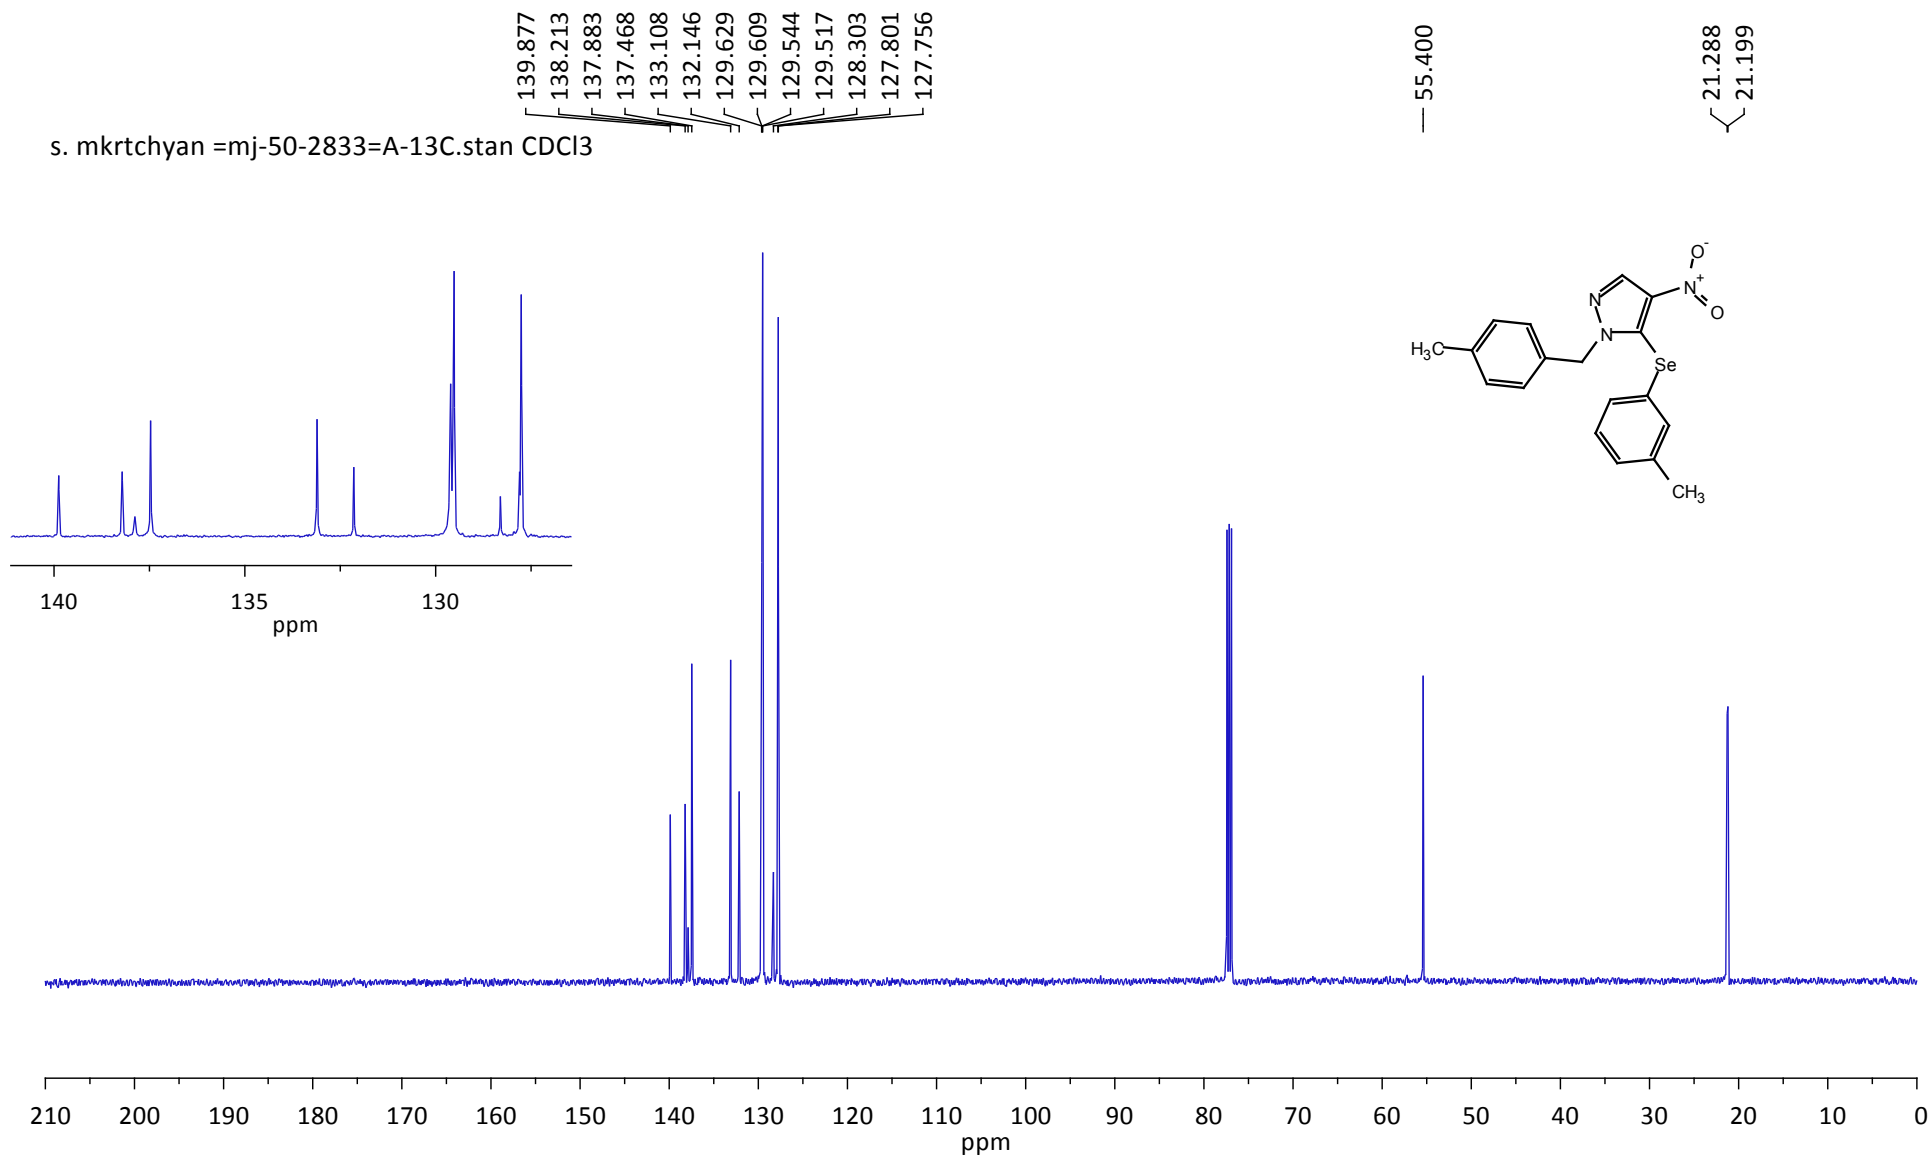

|                        |                                         |
|------------------------|-----------------------------------------|
| Comment                | s. mkrtyan =mj-50-2833=A-13C.stan CDCl3 |
| Number of Scans        | 512                                     |
| Spectrometer Frequency | 125.76                                  |
| Spectral Width         | 36057.7                                 |
| Spectral Size          | 65536                                   |

Compound **1b**

s. mkrтчyаn mj-126-5231H.stаn CDCl3

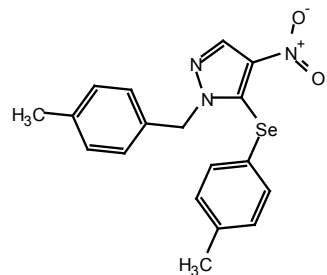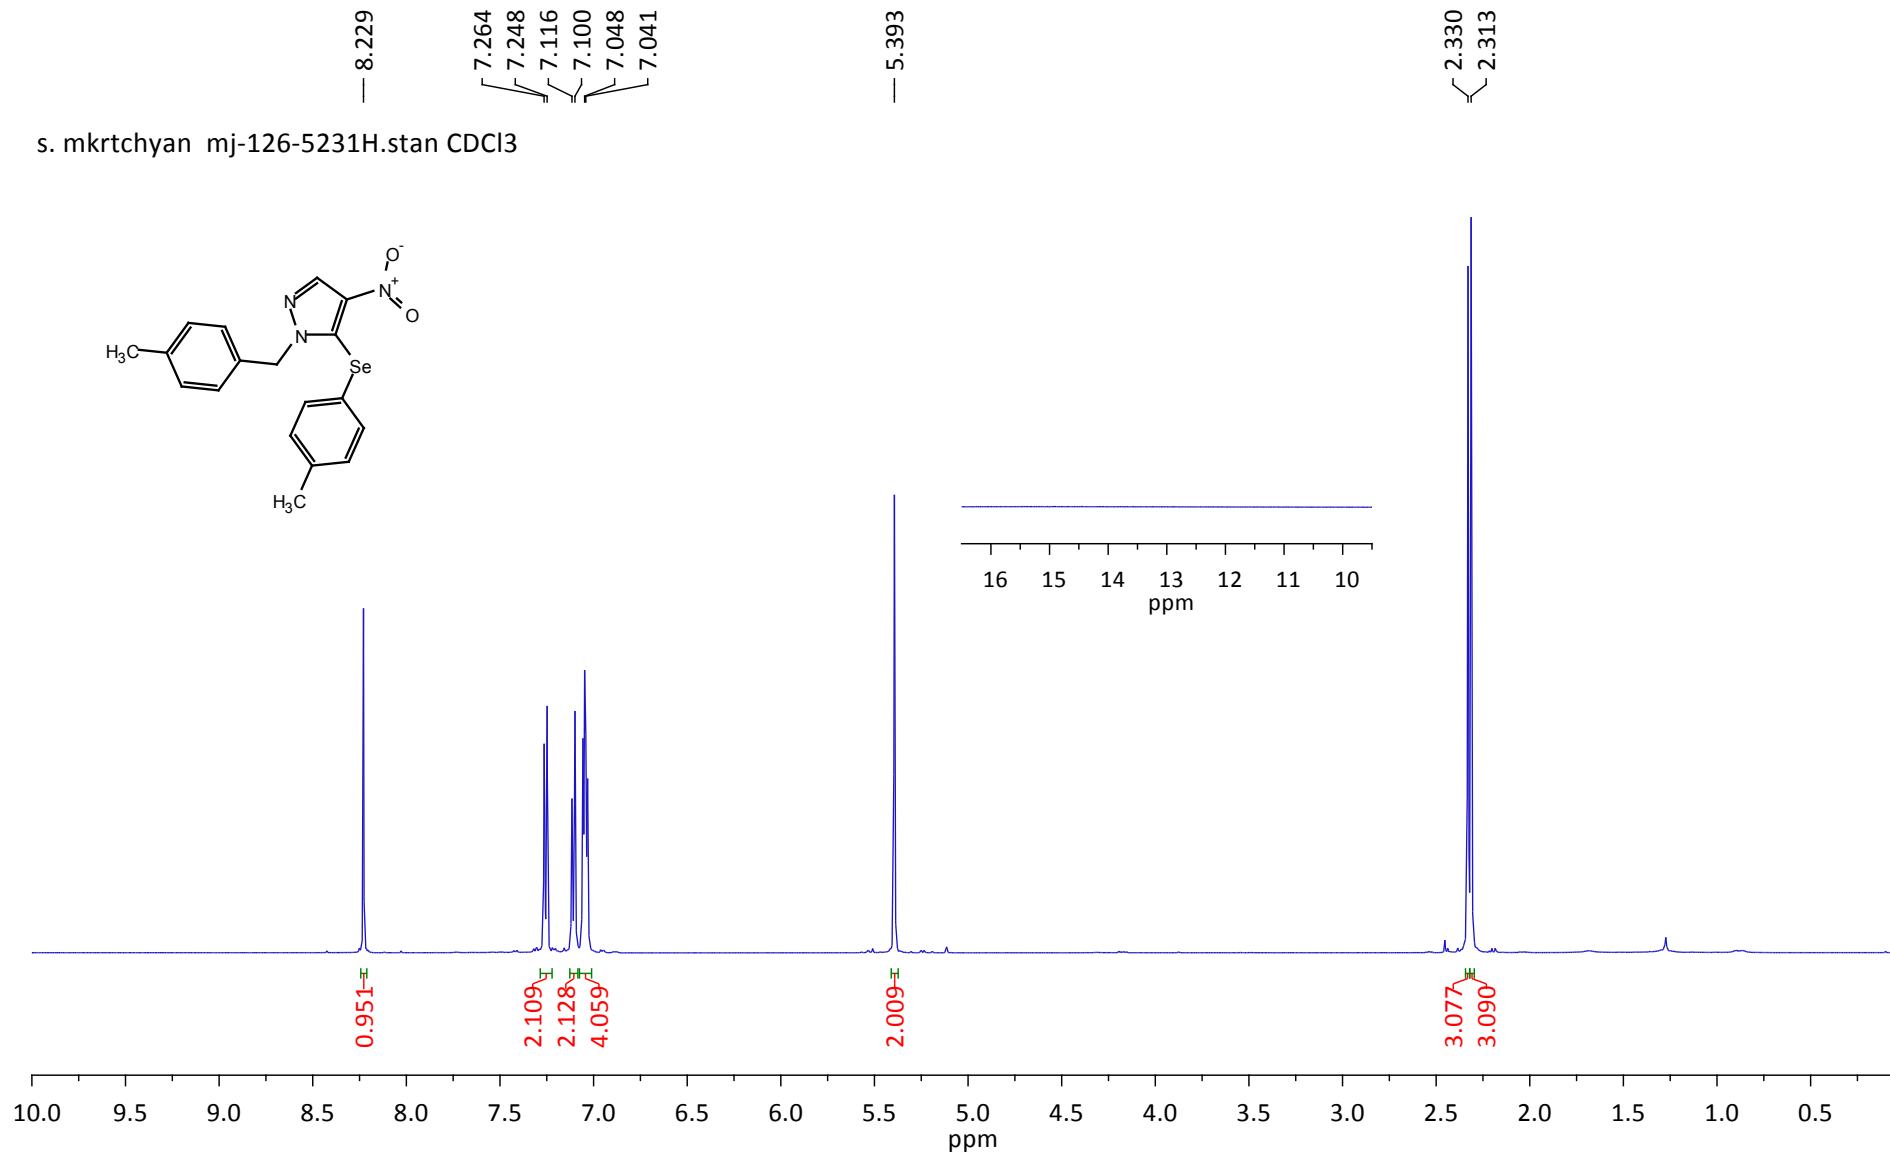

Comment s. mkrтчyаn mj-126-5231H.stаn CDCl3  
 Number of Scans 24  
 Spectrometer Frequency 500.13  
 Spectral Width 12335.5  
 Spectral Size 65536

Compound **1b**

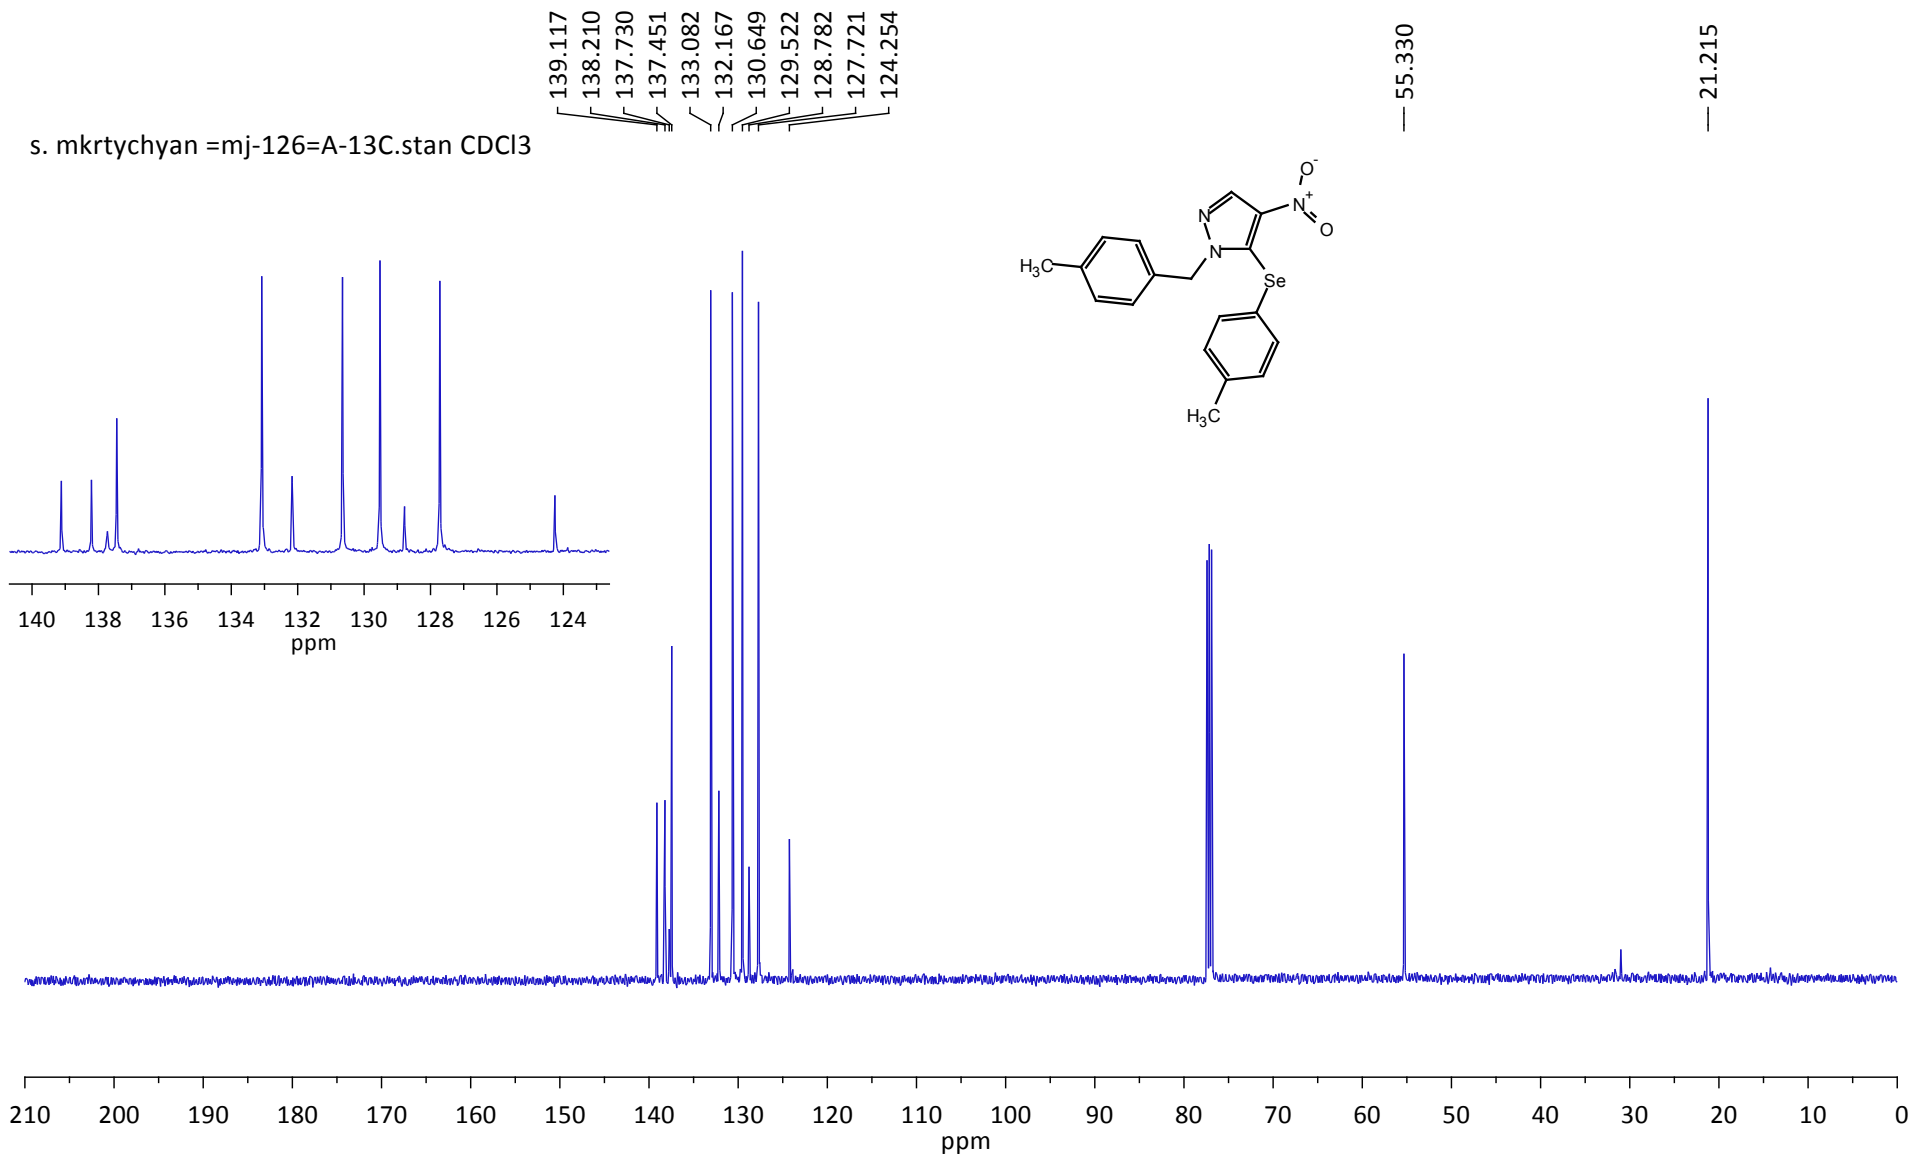

|                        |                                                    |
|------------------------|----------------------------------------------------|
| Comment                | s. mkrtychyan =mj-126=A-13C.stan CDCl <sub>3</sub> |
| Number of Scans        | 512                                                |
| Spectrometer Frequency | 125.76                                             |
| Spectral Width         | 36057.7                                            |
| Spectral Size          | 65536                                              |

Compound **1c**

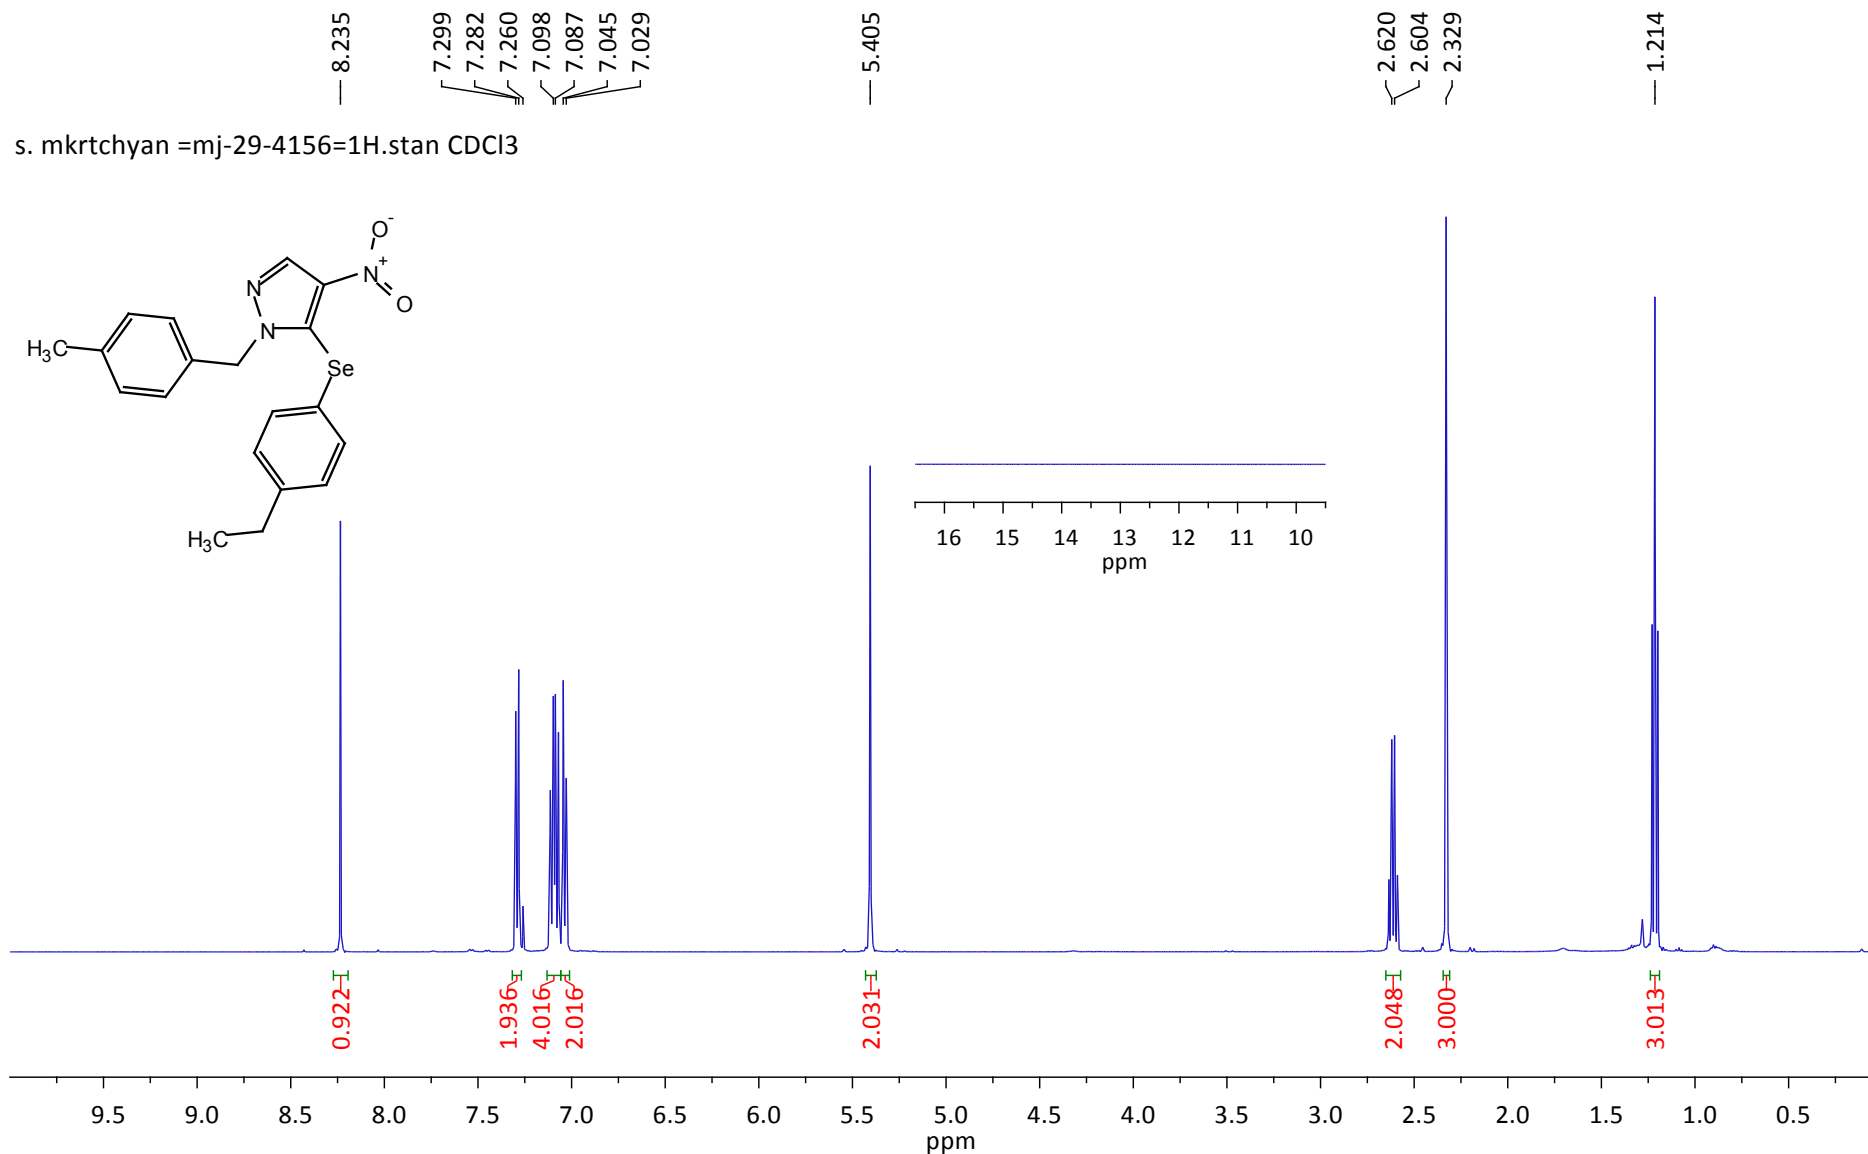

|                        |                                         |
|------------------------|-----------------------------------------|
| Comment                | S.mkrtyan =MJ-29-KI-F4156=1H.stan CDCl3 |
| Number of Scans        | 16                                      |
| Spectrometer Frequency | 500.13                                  |
| Spectral Width         | 12335.5                                 |
| Spectral Size          | 65536                                   |

Compound 1c

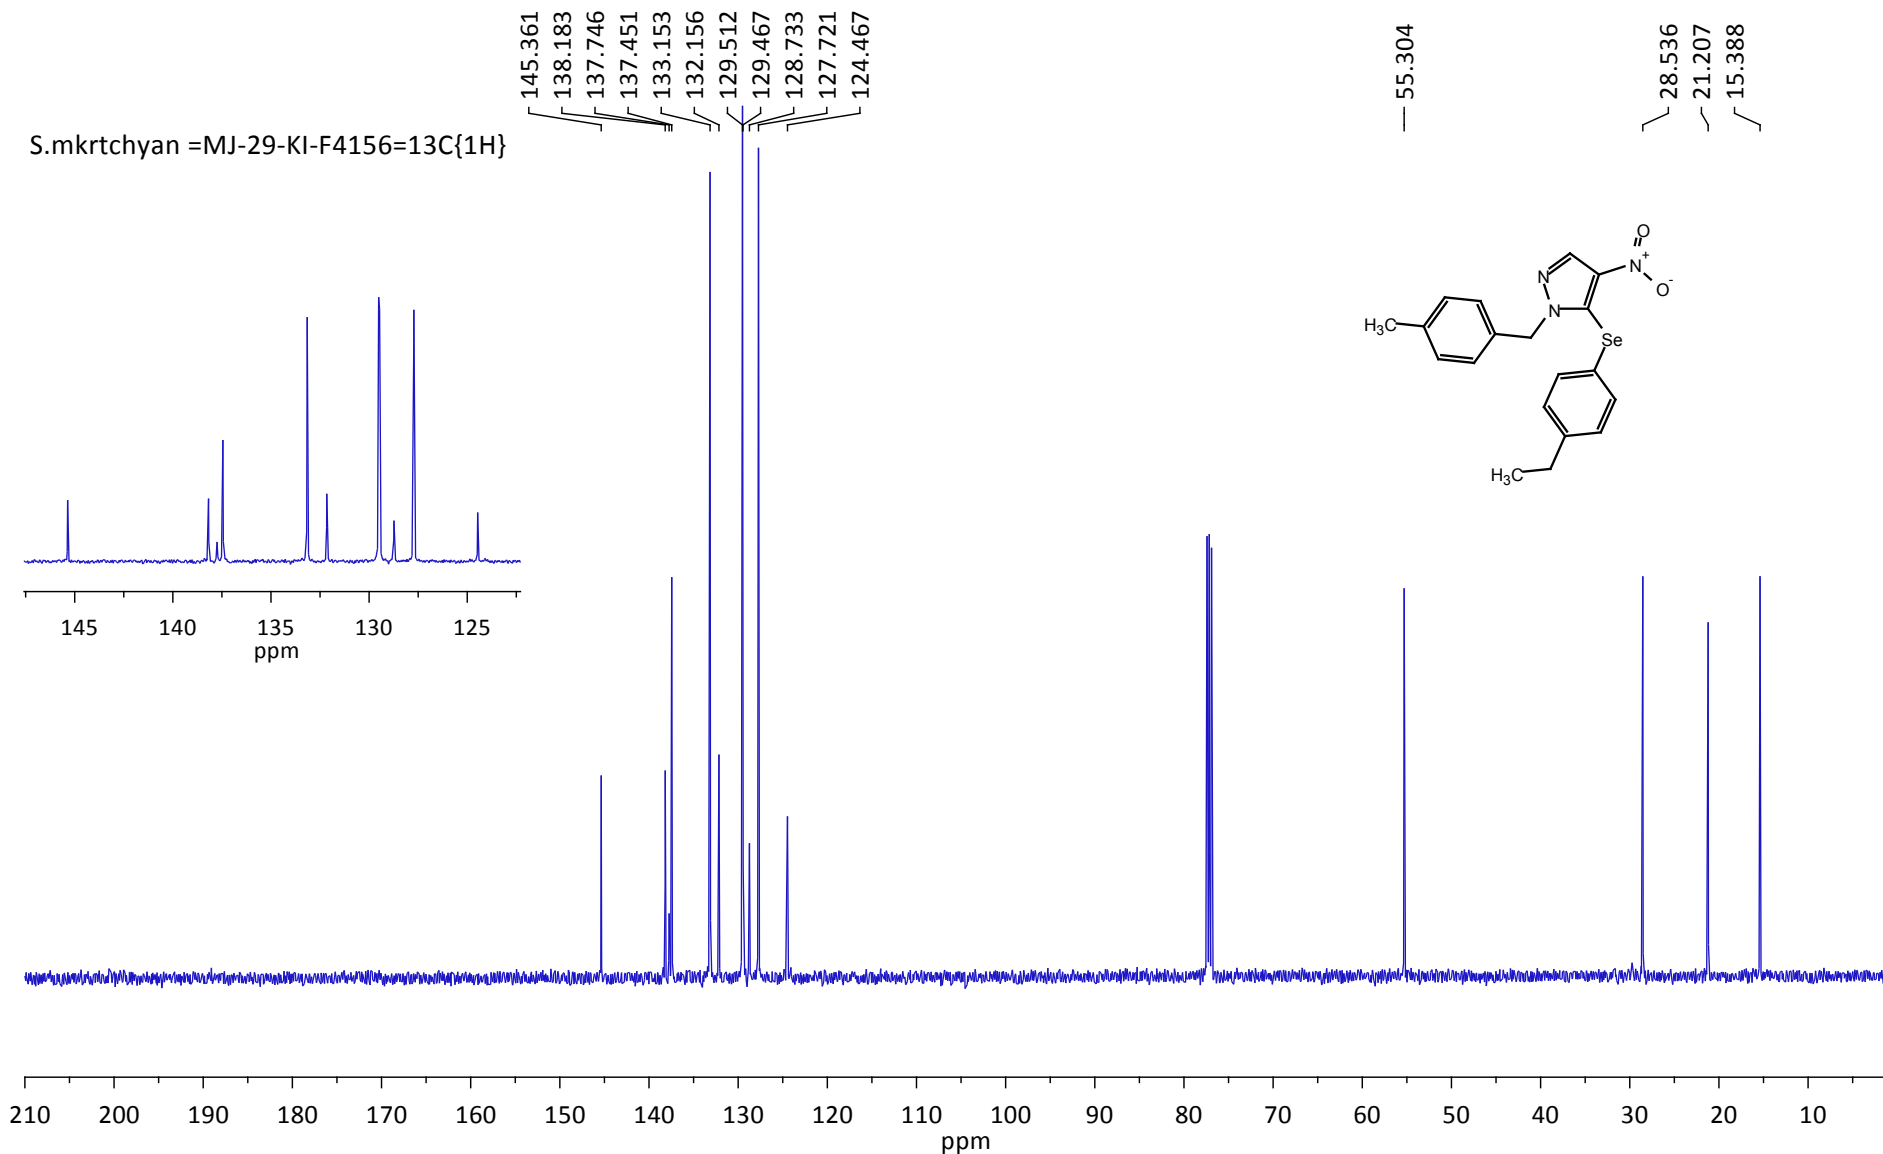

Comment S.mkrtyan =MJ-29-KI-F4156=13C{1H}

Number of Scans 256

Spectrometer Frequency 125.76

Spectral Width 36057.7

Spectral Size 65536

Compound **1d**

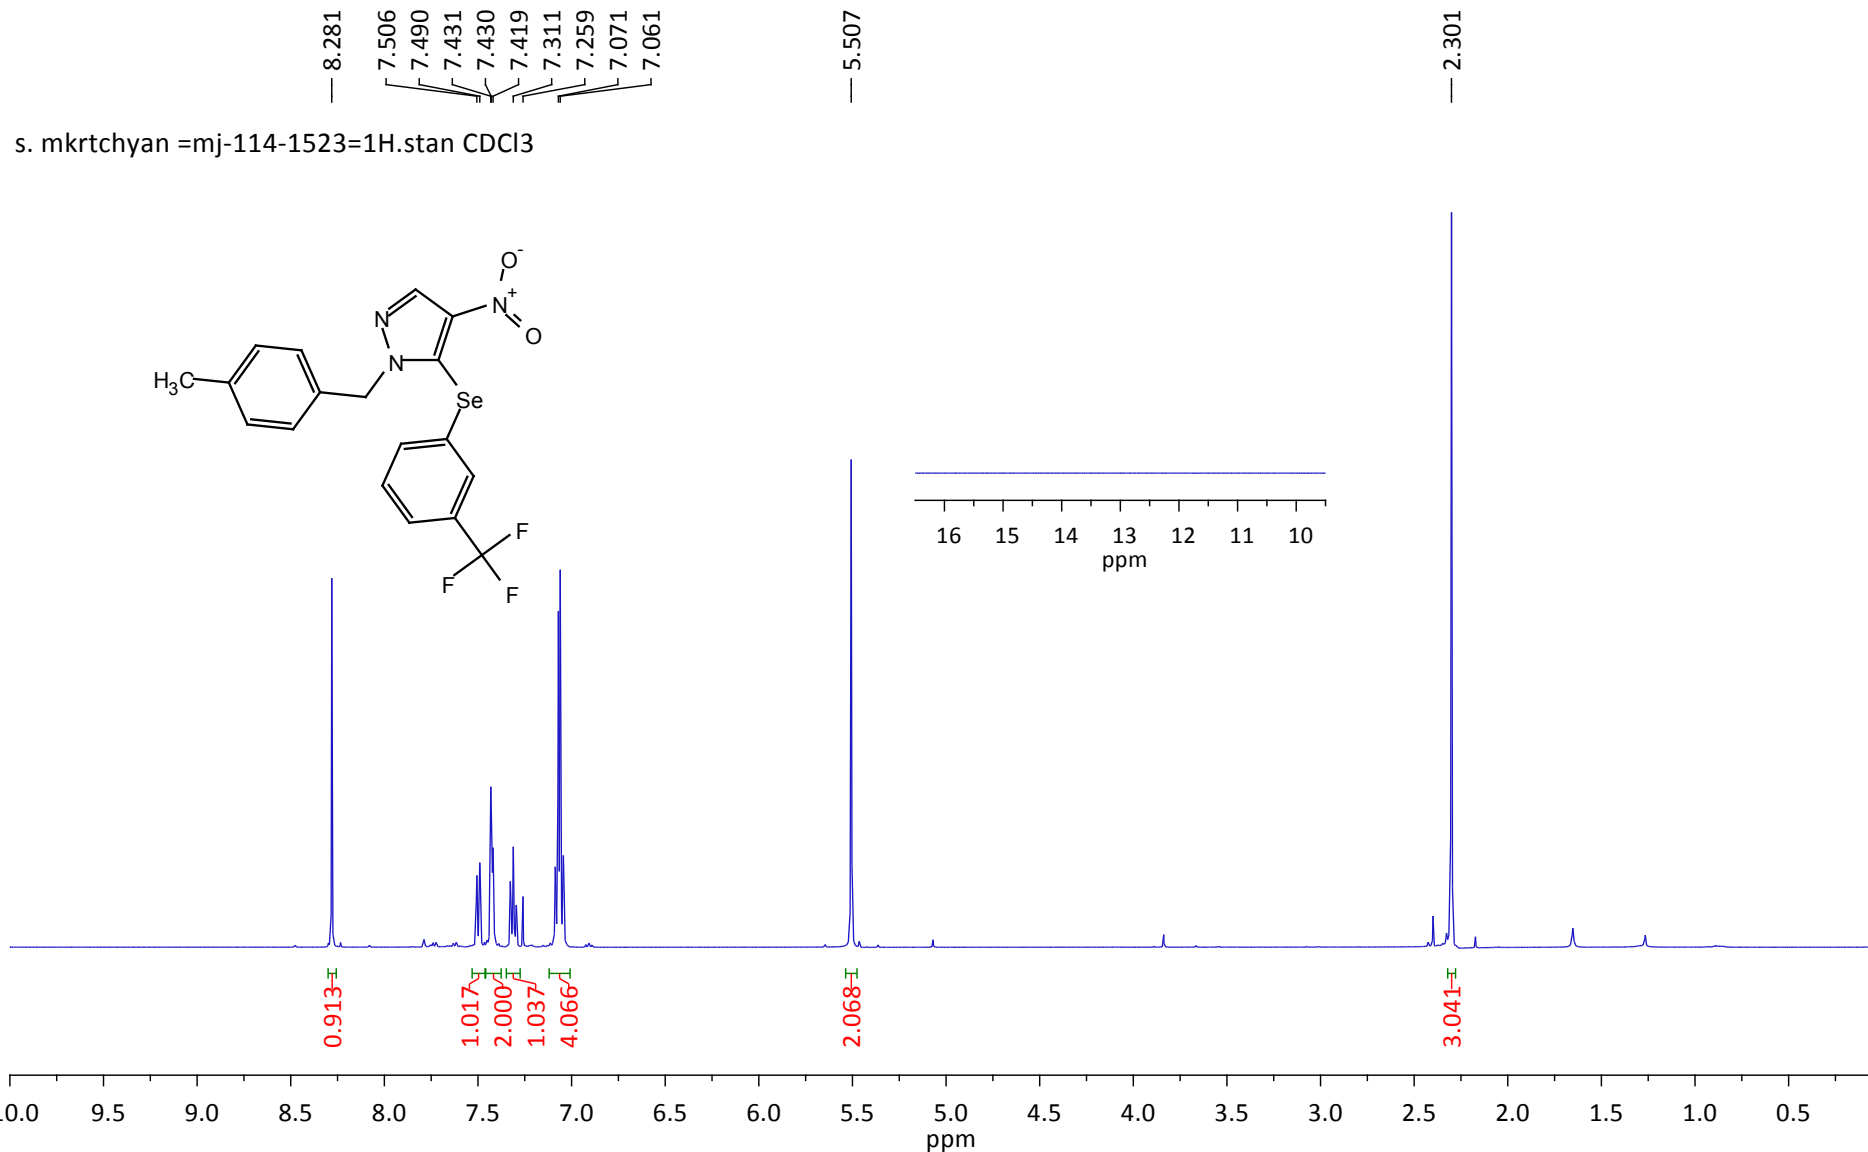

Comment s. mkrtyan =mj-114-1523=1H.stan CDCl<sub>3</sub>  
 Number of Scans 32  
 Spectrometer Frequency 500.13  
 Spectral Width 12335.5  
 Spectral Size 65536

Compound **1d**

138.557  
138.277  
137.629  
135.435  
132.384  
132.124  
131.854  
131.602  
130.113  
129.676  
129.347  
128.657  
128.627  
127.627  
126.655  
125.332  
125.304  
124.428  
122.258  
120.089

s. mkrtyan =mj-114-1523=A-13C.stan CDCl3

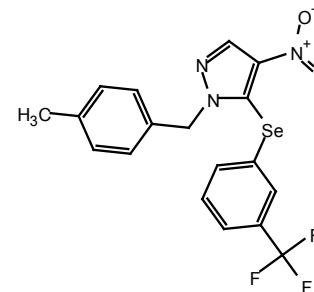

— 55.868

— 21.159

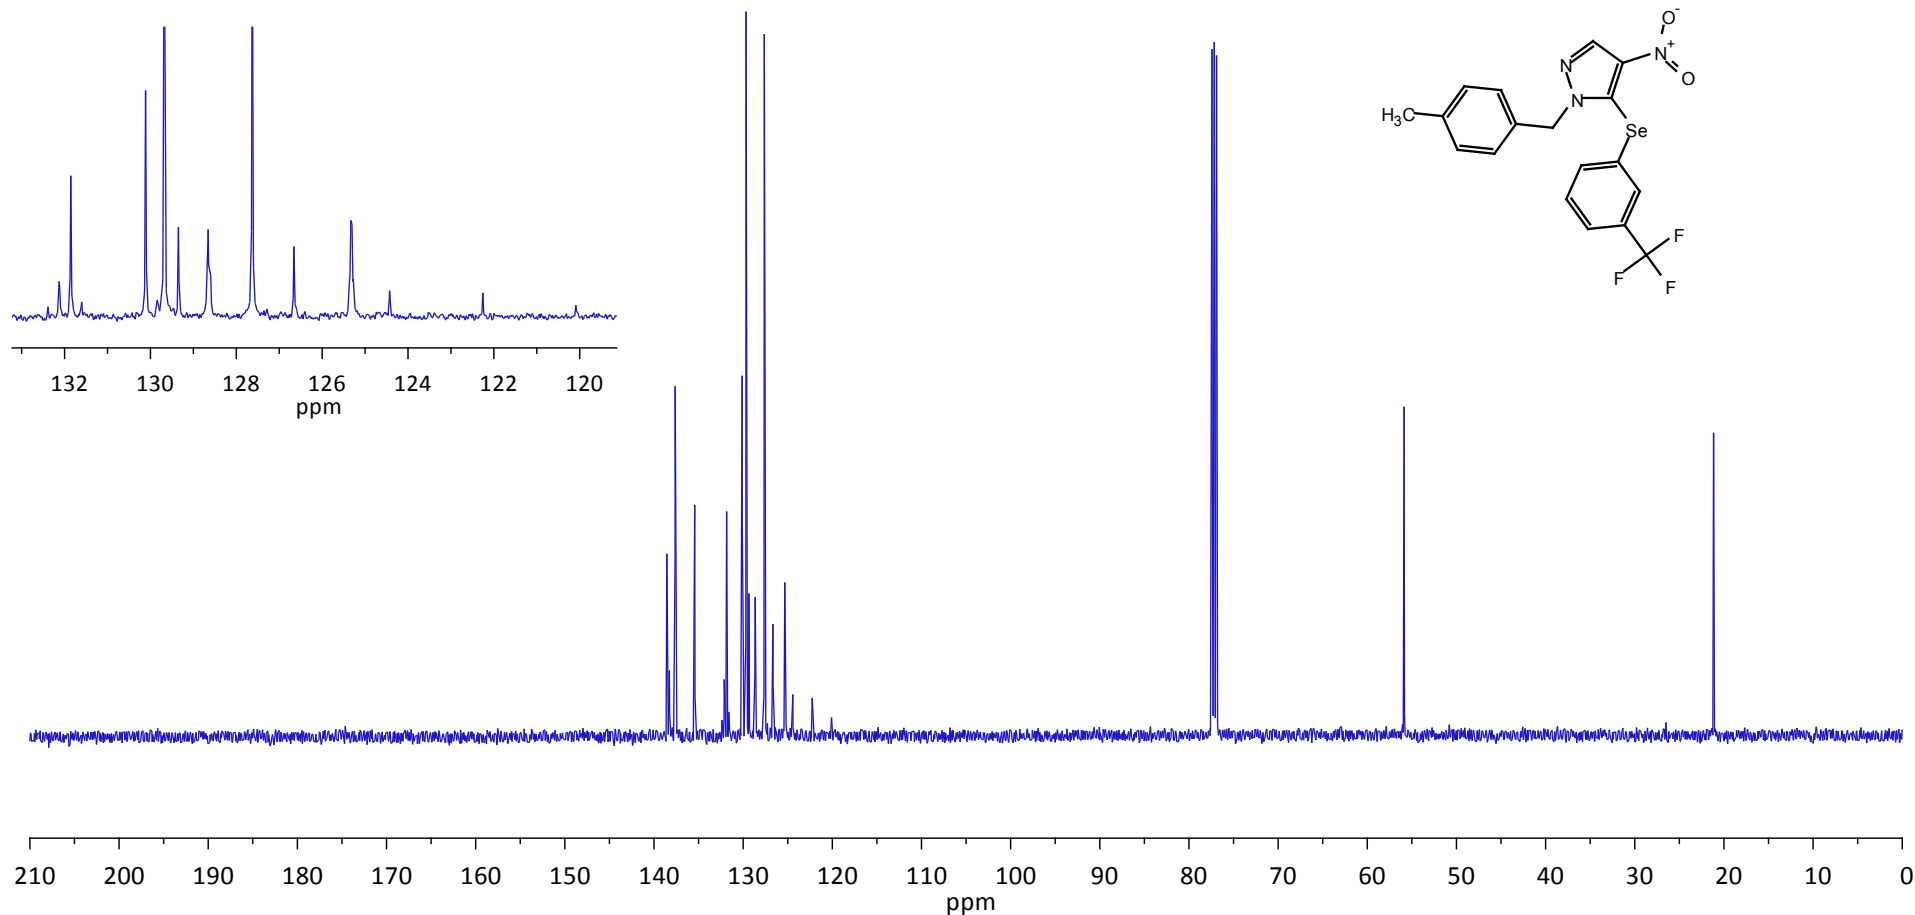

Comment s. mkrtyan =mj-114-1523=A-13C.stan CDCl3  
 Number of Scans 336  
 Spectrometer Frequency 125.76  
 Spectral Width 36057.7  
 Spectral Size 65536



Compound **1e**

s. mkrtyan mj-1291H.stan CDCl<sub>3</sub>

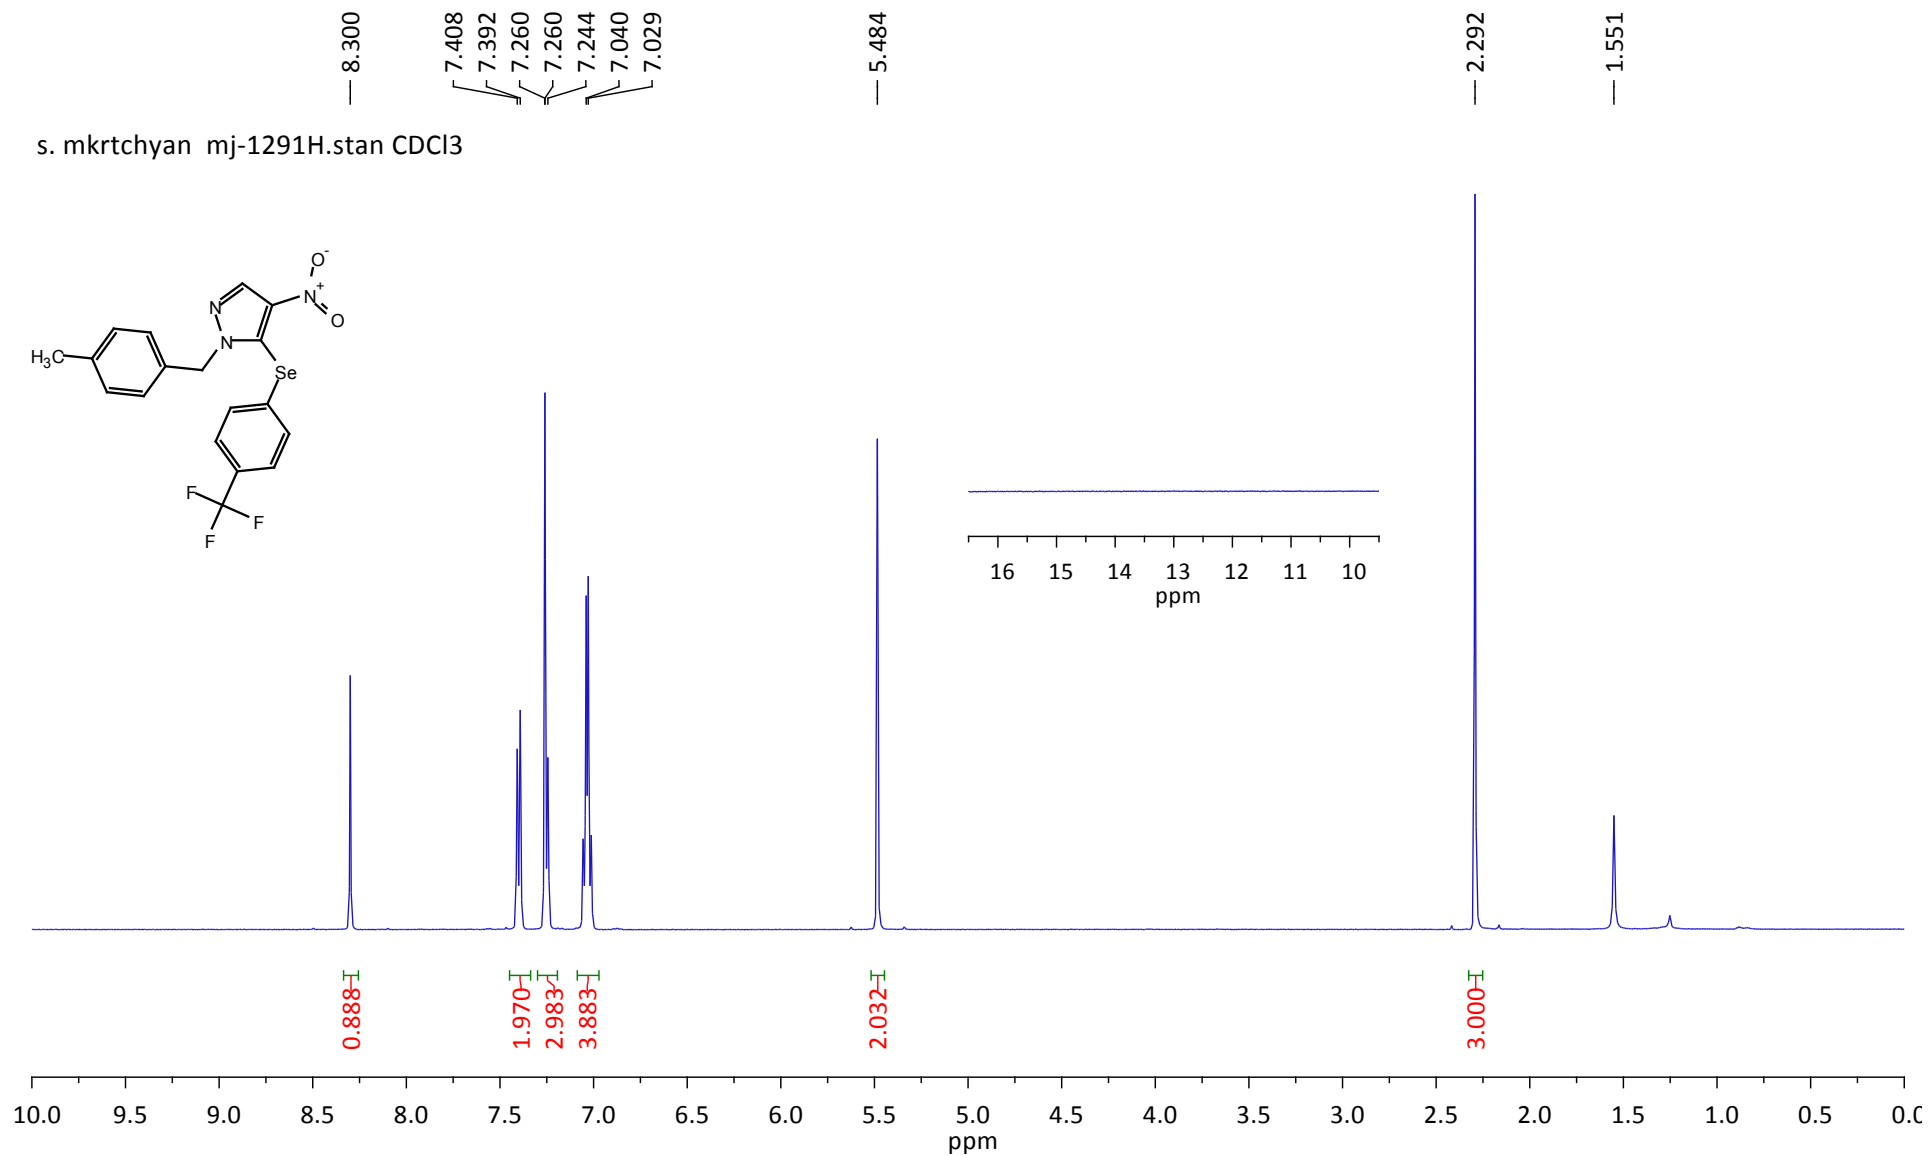

|                        |                                            |
|------------------------|--------------------------------------------|
| Comment                | s. mkrtyan mj-1291H.stan CDCl <sub>3</sub> |
| Number of Scans        | 24                                         |
| Spectrometer Frequency | 500.13                                     |
| Spectral Width         | 12335.5                                    |
| Spectral Size          | 65536                                      |

Compound **1e**

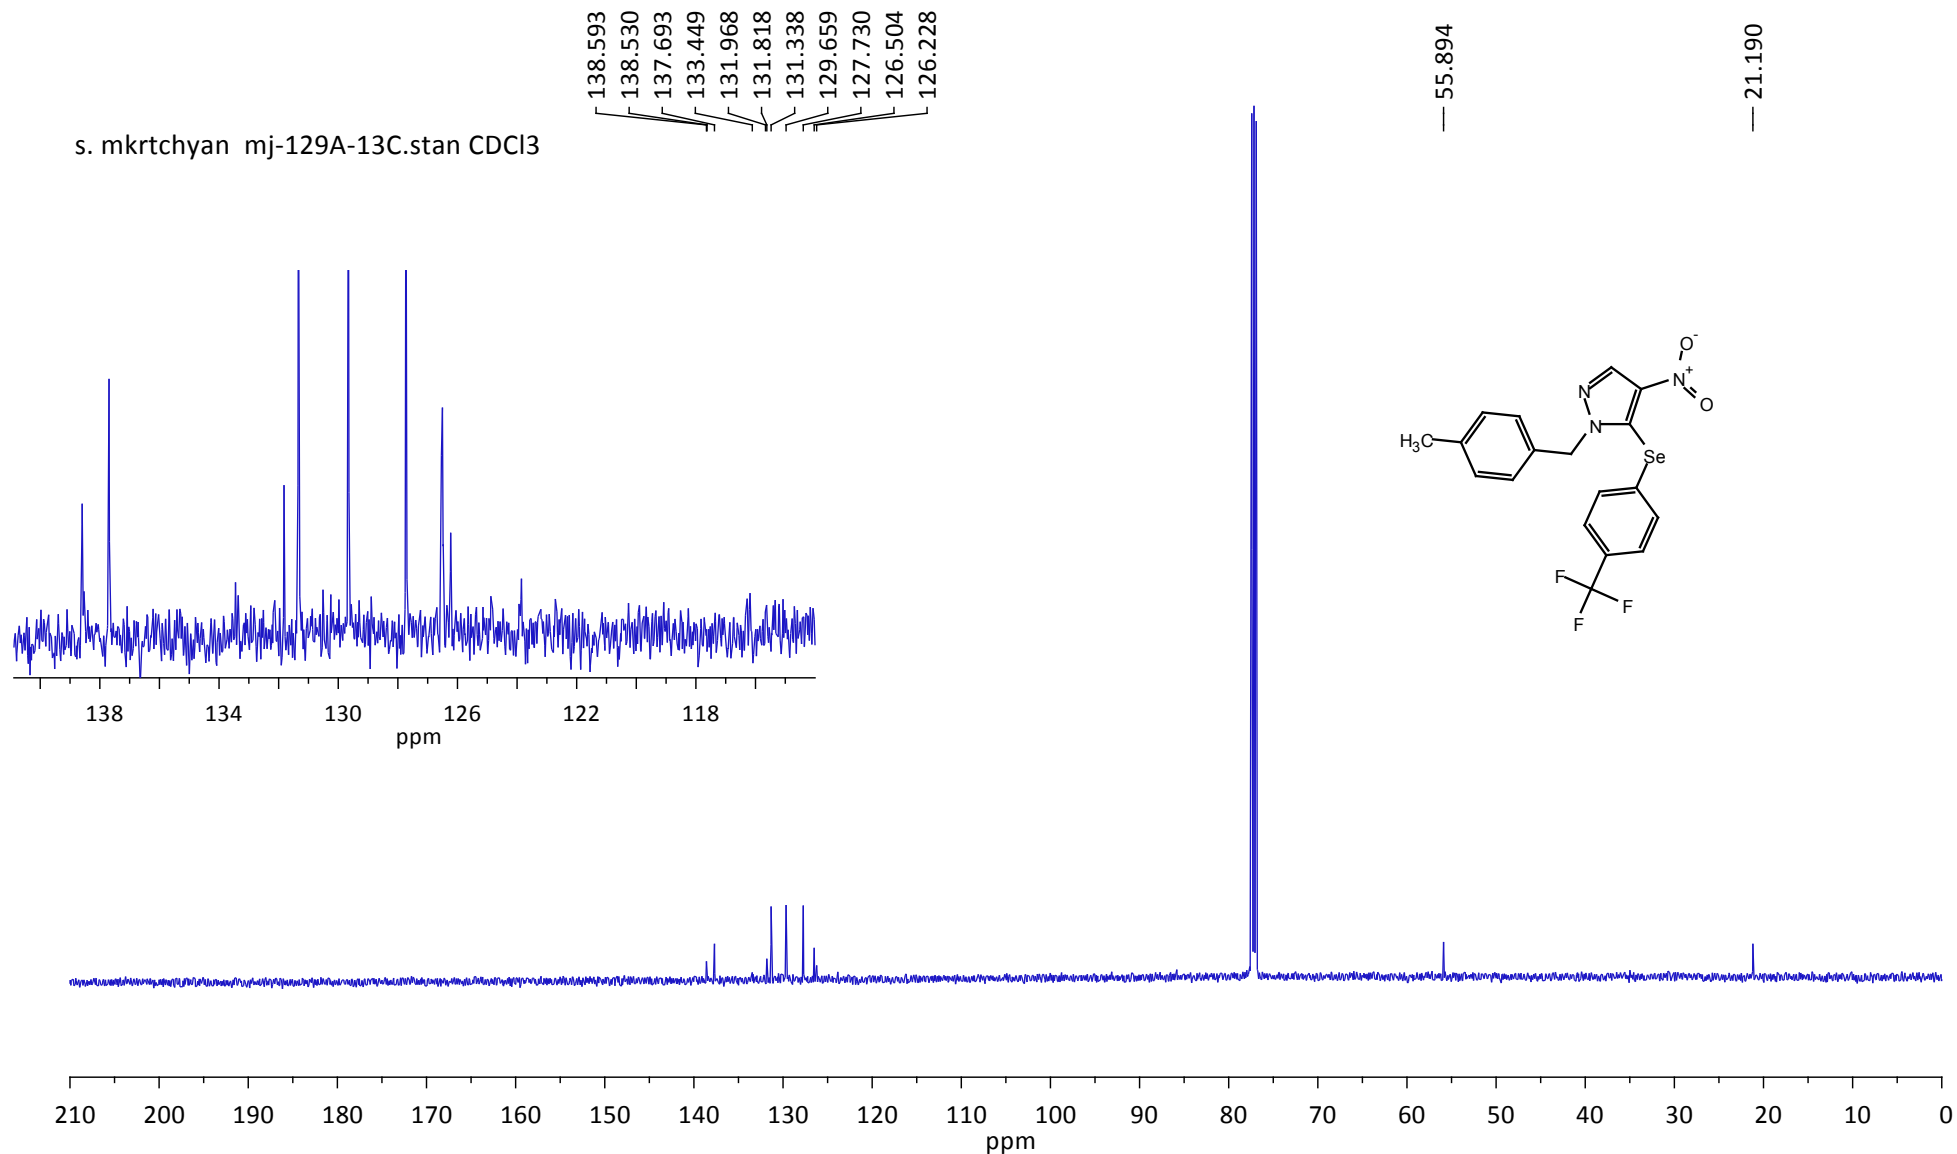

Comment s. mkrтчyan mj-129A-13C.stan CDCl3  
Number of Scans 2048  
Spectrometer Frequency 125.76  
Spectral Width 36057.7  
Spectral Size 65536

Compound **1f**

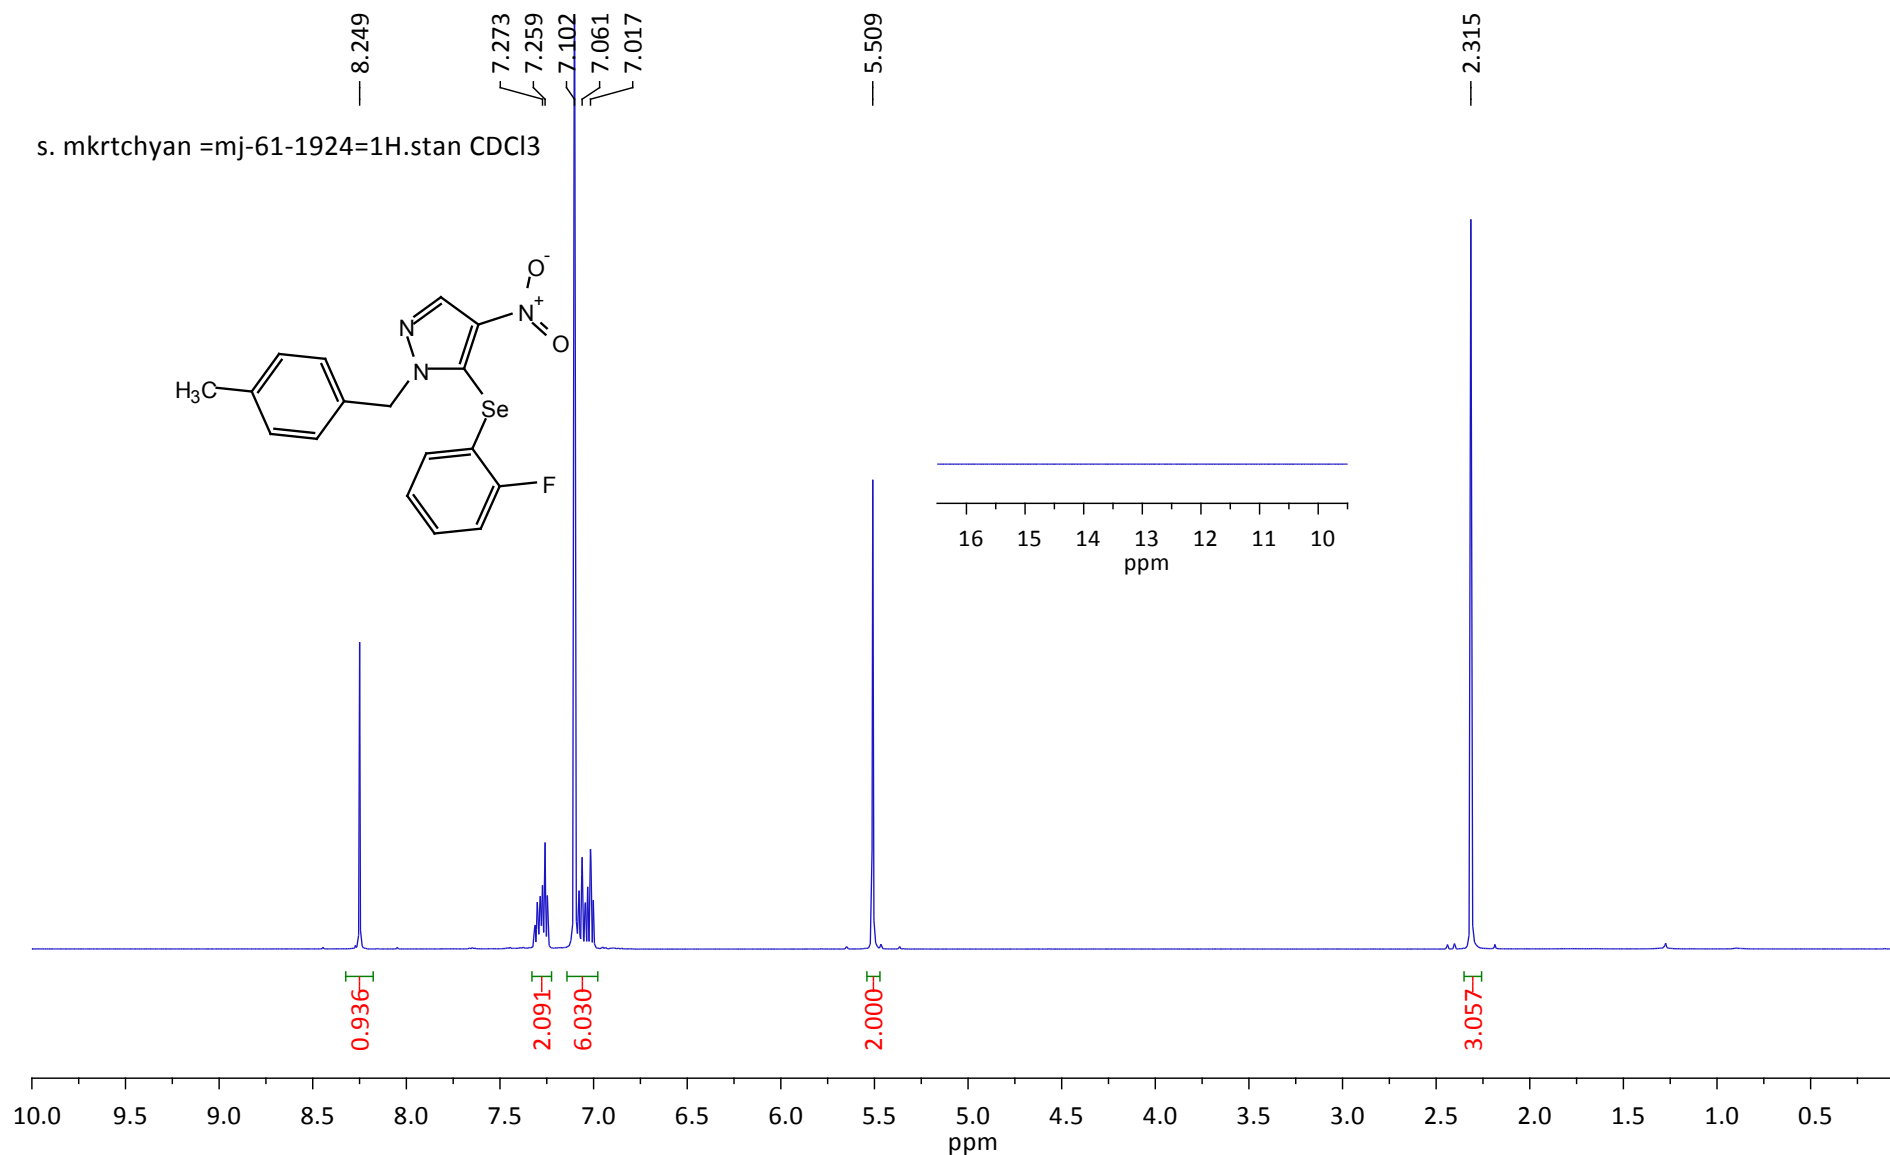

Comment s. mkrtyan =mj-61-1924=1H.stan CDCl3  
Number of Scans 24  
Spectrometer Frequency 500.13  
Spectral Width 12335.5  
Spectral Size 65536

Compound **1f**

s. mkrtchyan =mj-61-1924=A-13C.stan CDCl<sub>3</sub>

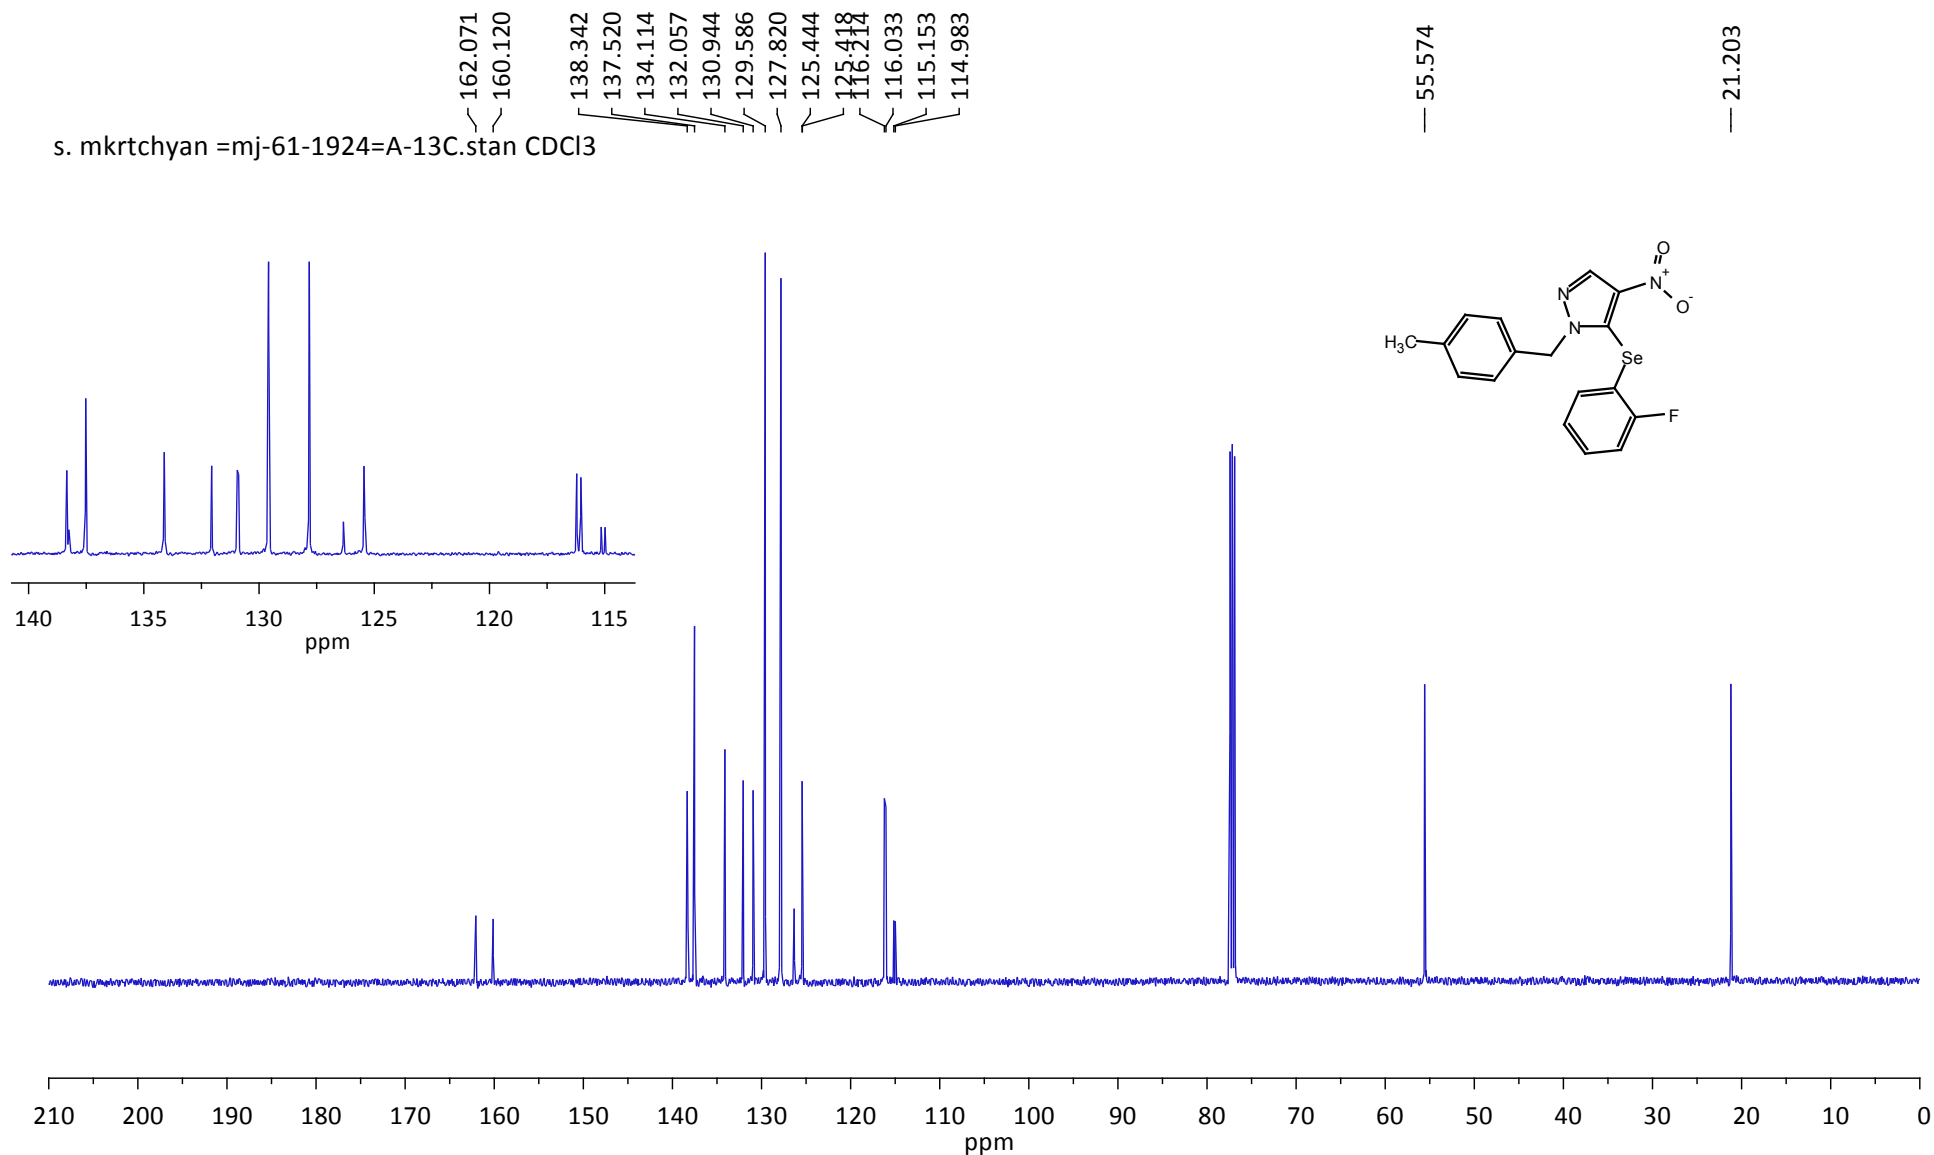

Comment s. mkrtchyan =mj-61-1924=A-13C.stan CDCl<sub>3</sub>

Number of Scans 512

Spectrometer Frequency 125.76

Spectral Width 36057.7

Spectral Size 65536

Compound **1g**

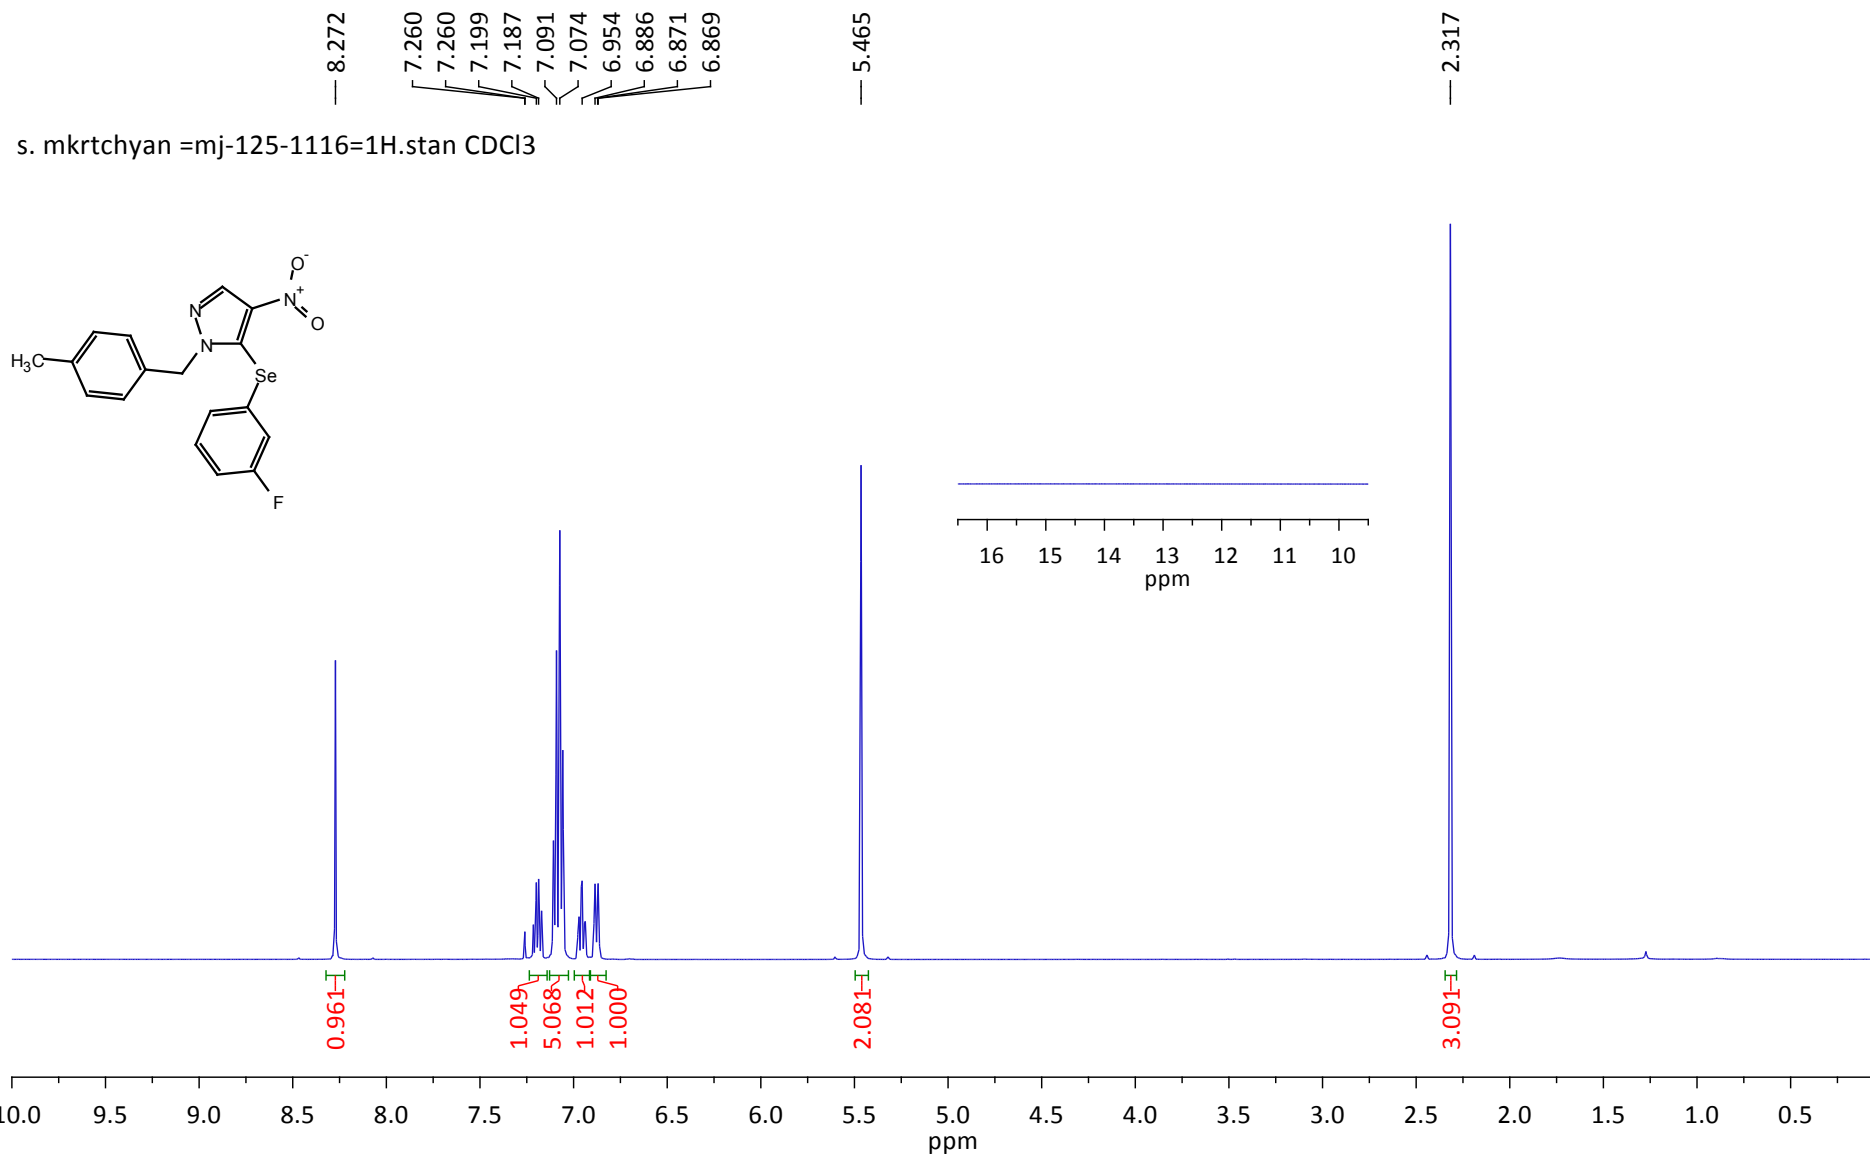

Comment s. mkrтчyan =mj-125-1116=1H.stan CDCl3  
 Number of Scans 24  
 Spectrometer Frequency 500.13  
 Spectral Width 12335.5  
 Spectral Size 65536

Compound **1g**

s. mkrtyan =mj-125-1116=A-13C.stan CDCl<sub>3</sub>

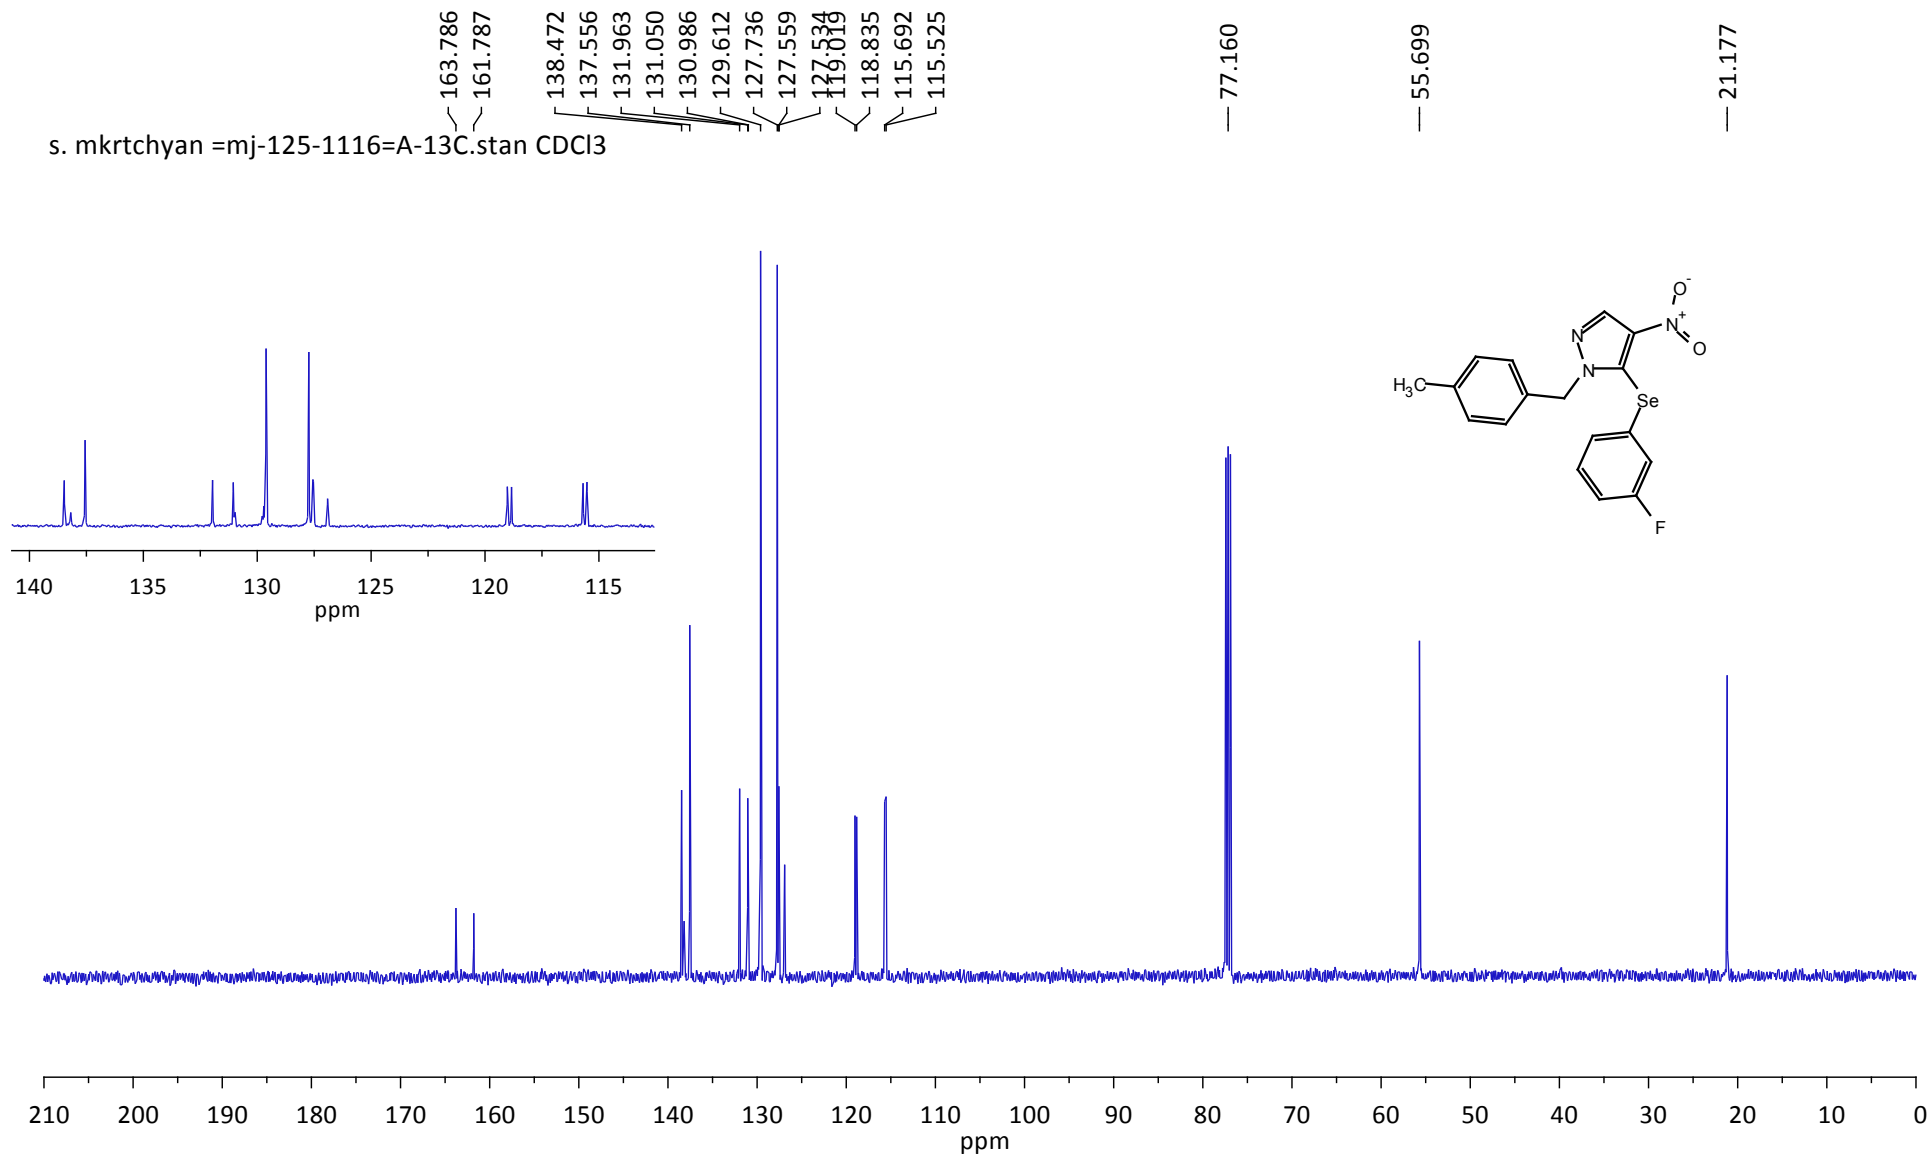

Comment s. mkrtyan =mj-125-1116=A-13C.stan CDCl<sub>3</sub>

Number of Scans 256

Spectrometer Frequency 125.76

Spectral Width 36057.7

Spectral Size 65536

Compound **1h**

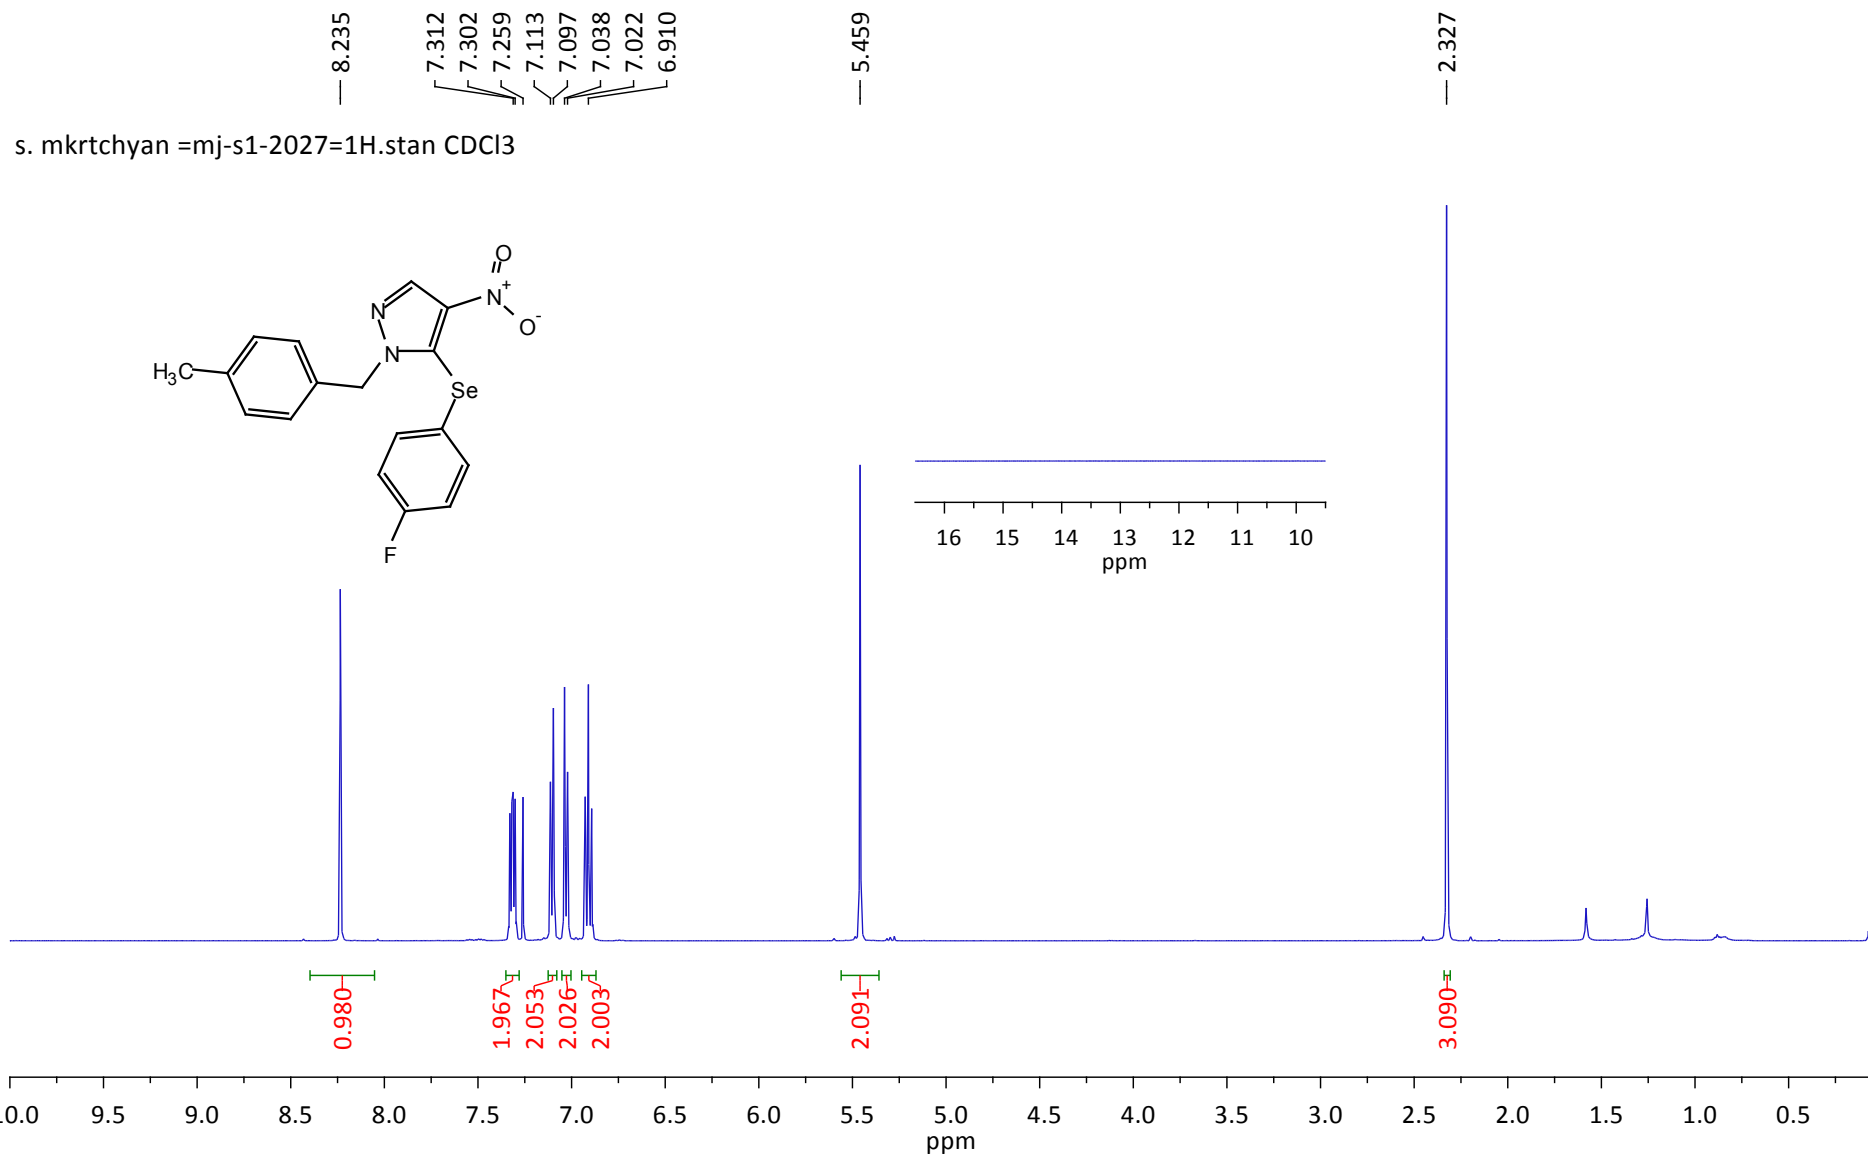

|                        |                                                  |
|------------------------|--------------------------------------------------|
| Comment                | s. mkrtyan =mj-s1-2027=1H.stan CDCl <sub>3</sub> |
| Number of Scans        | 24                                               |
| Spectrometer Frequency | 500.13                                           |
| Spectral Width         | 12335.5                                          |
| Spectral Size          | 65536                                            |

Compound **1h**

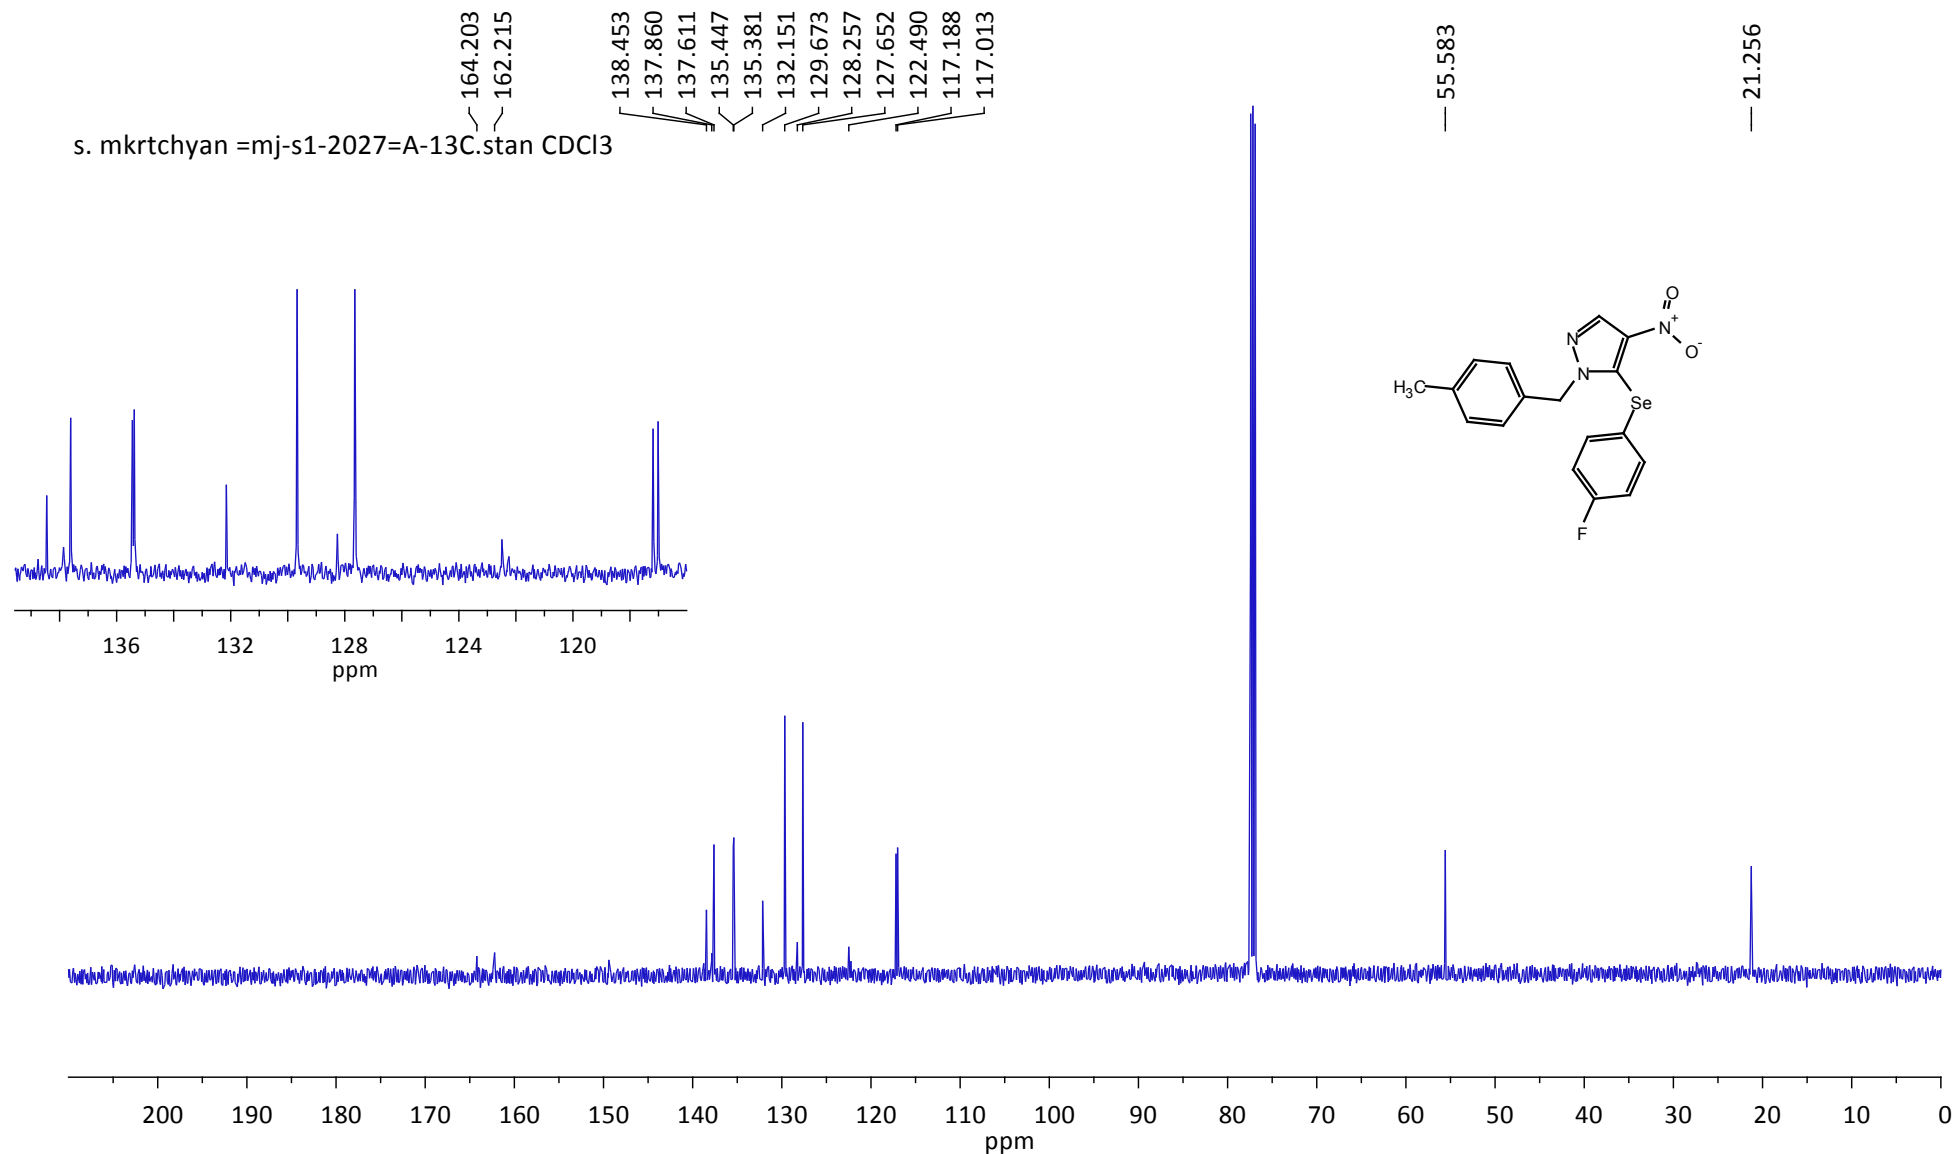

|                        |                                         |
|------------------------|-----------------------------------------|
| Comment                | s. mkrtyan =mj-s1-2027=A-13C.stan CDCl3 |
| Number of Scans        | 256                                     |
| Spectrometer Frequency | 125.76                                  |
| Spectral Width         | 36057.7                                 |
| Spectral Size          | 65536                                   |



Compound **1i**

s. mkrтчyan =mj-128-crs=1H.stan CDCl3

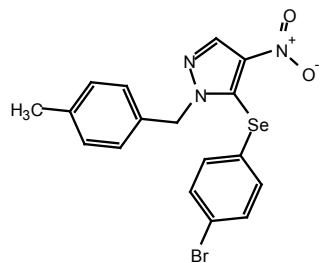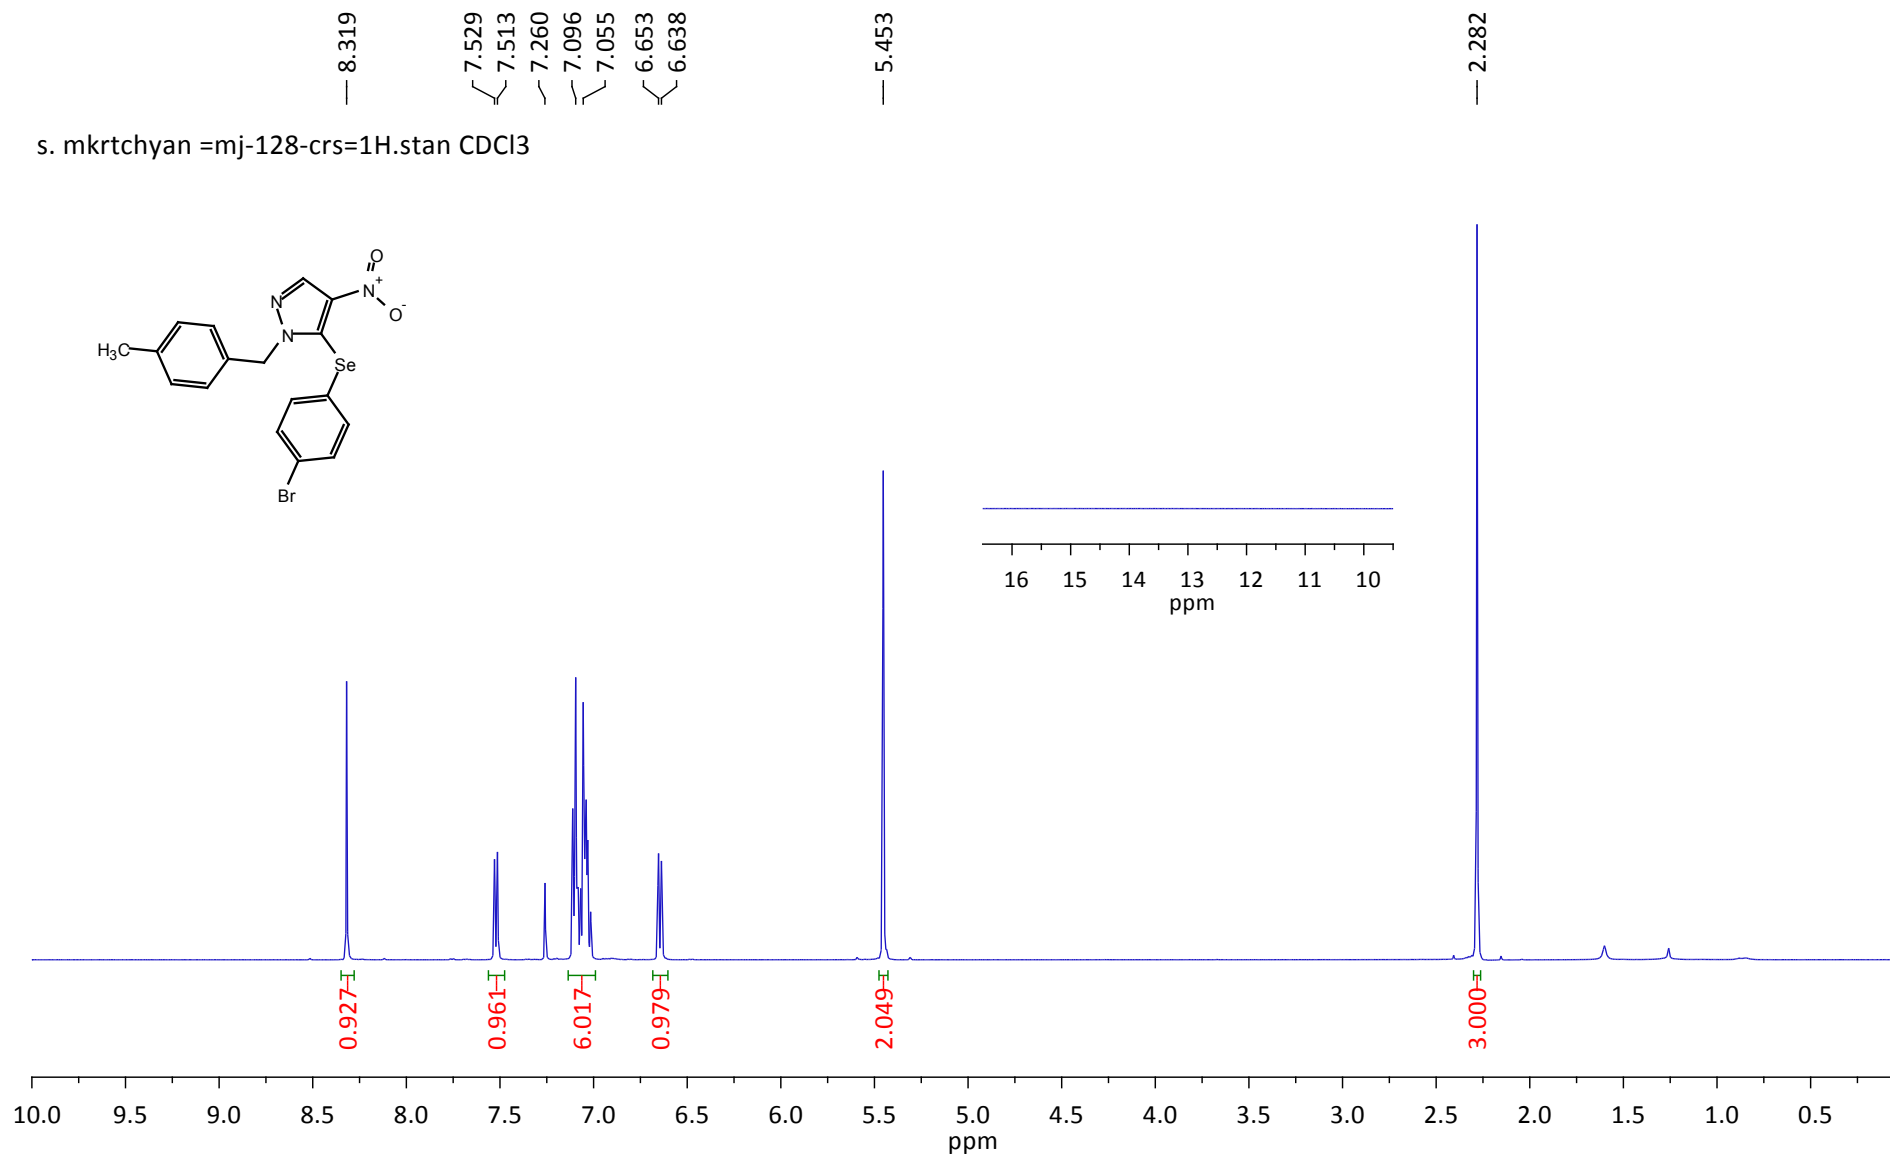

Comment s. mkrтчyan =mj-128-crs=1H.stan CDCl3  
 Number of Scans 24  
 Spectrometer Frequency 500.13  
 Spectral Width 12335.5  
 Spectral Size 65536

Compound **1i**

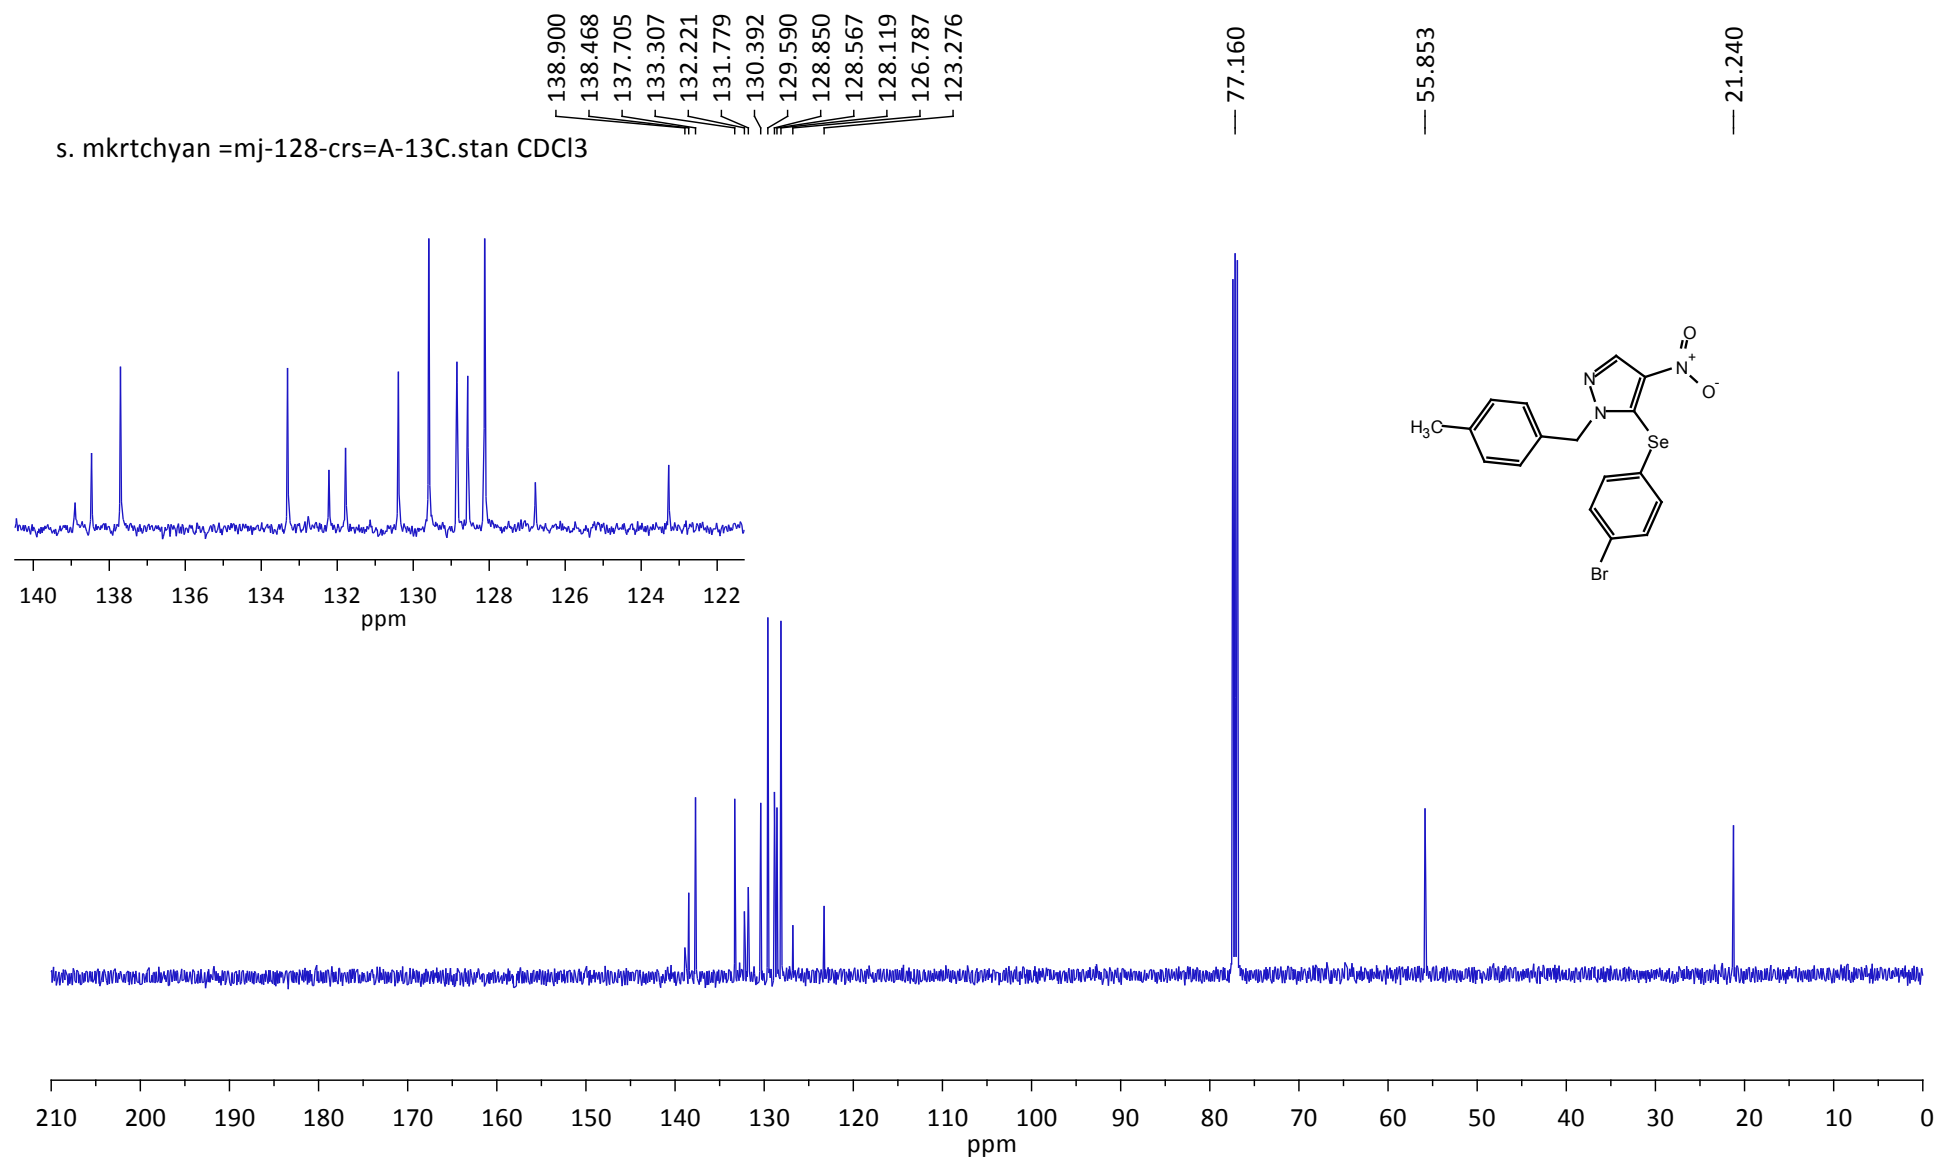

s. mkrtchyan =mj-128-crs=A-13C.stan CDCl3

Comment s. mkrtchyan =mj-128-crs=A-13C.stan CDCl3

Number of Scans 256

Spectrometer Frequency 125.76

Spectral Width 36057.7

Spectral Size 65536

Compound 2a

8.305  
7.599  
7.535  
7.520  
7.342  
7.308  
7.260  
7.260  
7.246  
7.001  
6.997  
6.986  
6.982

4.580

3.128

s. mkrtychyan =mj-...-f3445=1H.stan CDCl3

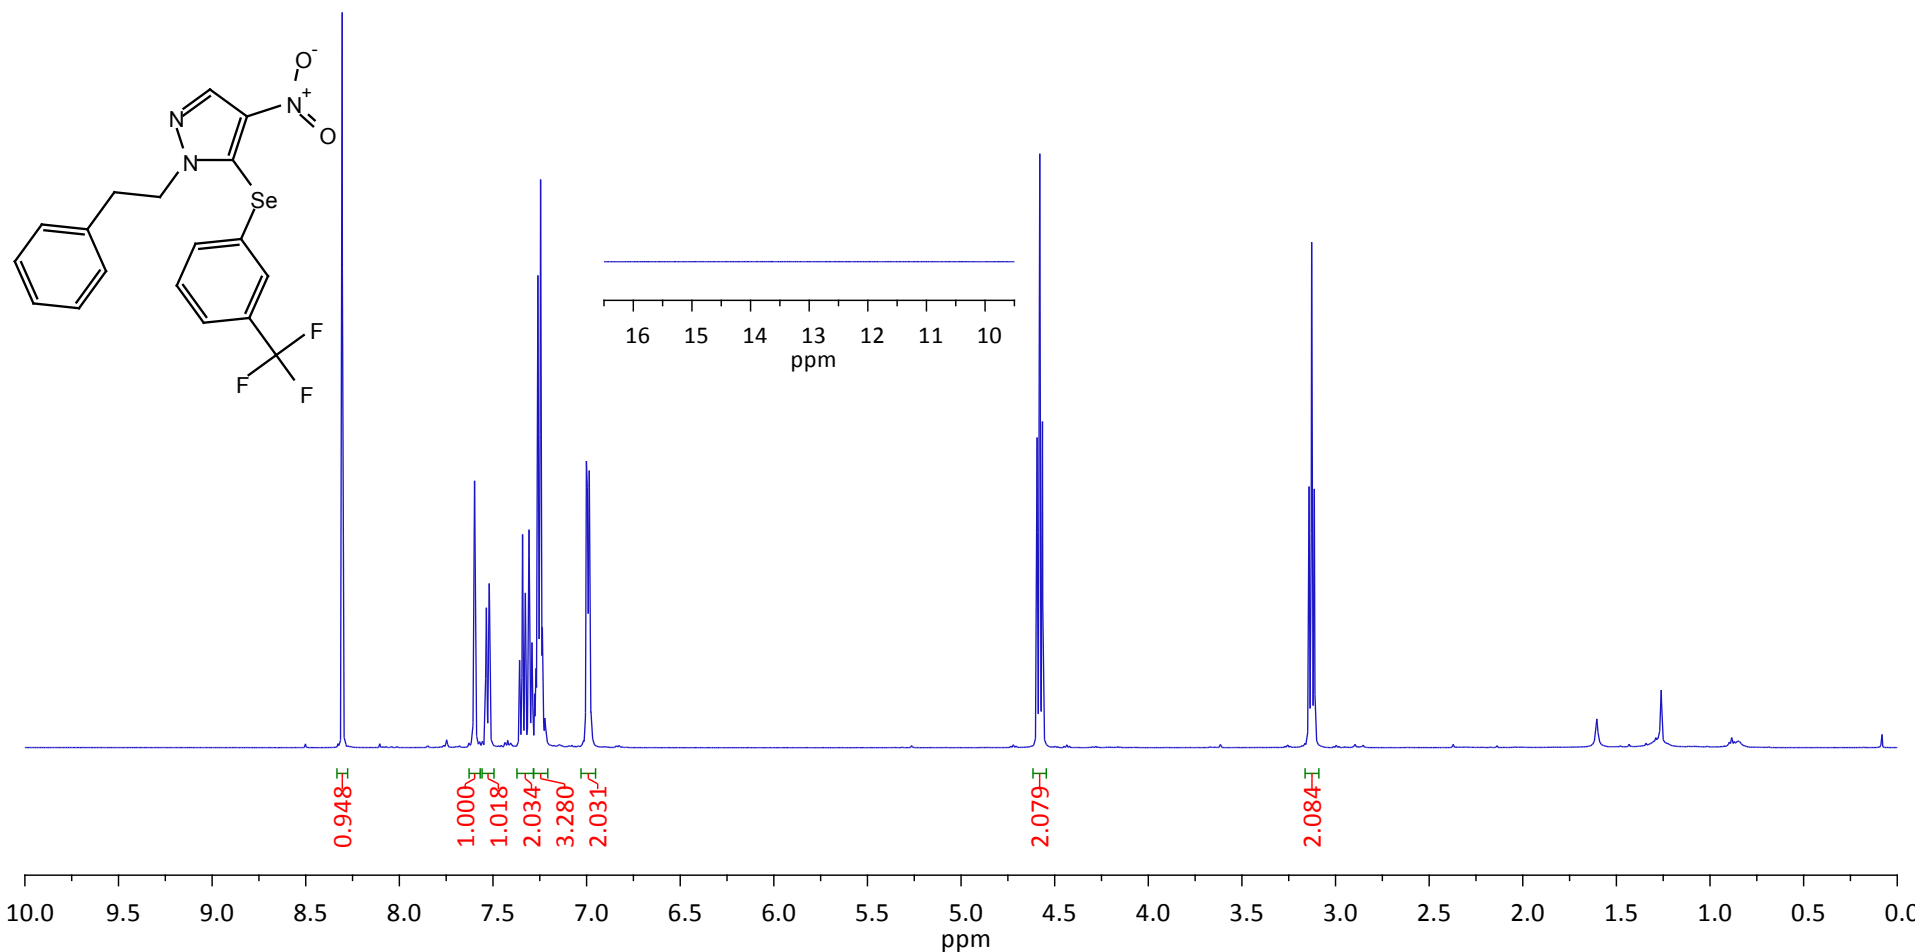

Comment s. mkrtychyan =mj-...-f3445=1H.stan CDCl3  
 Number of Scans 24  
 Spectrometer Frequency 500.13  
 Spectral Width 12335.5  
 Spectral Size 65536

# Compound 2a

137.876  
137.540  
136.704  
135.011  
132.261  
131.999  
130.321  
129.767  
128.980  
128.878  
128.357  
128.328  
127.505  
127.391  
125.341  
125.313

s. mkrtychyan =mj-...-f3445=A-13C.stan CDCl3

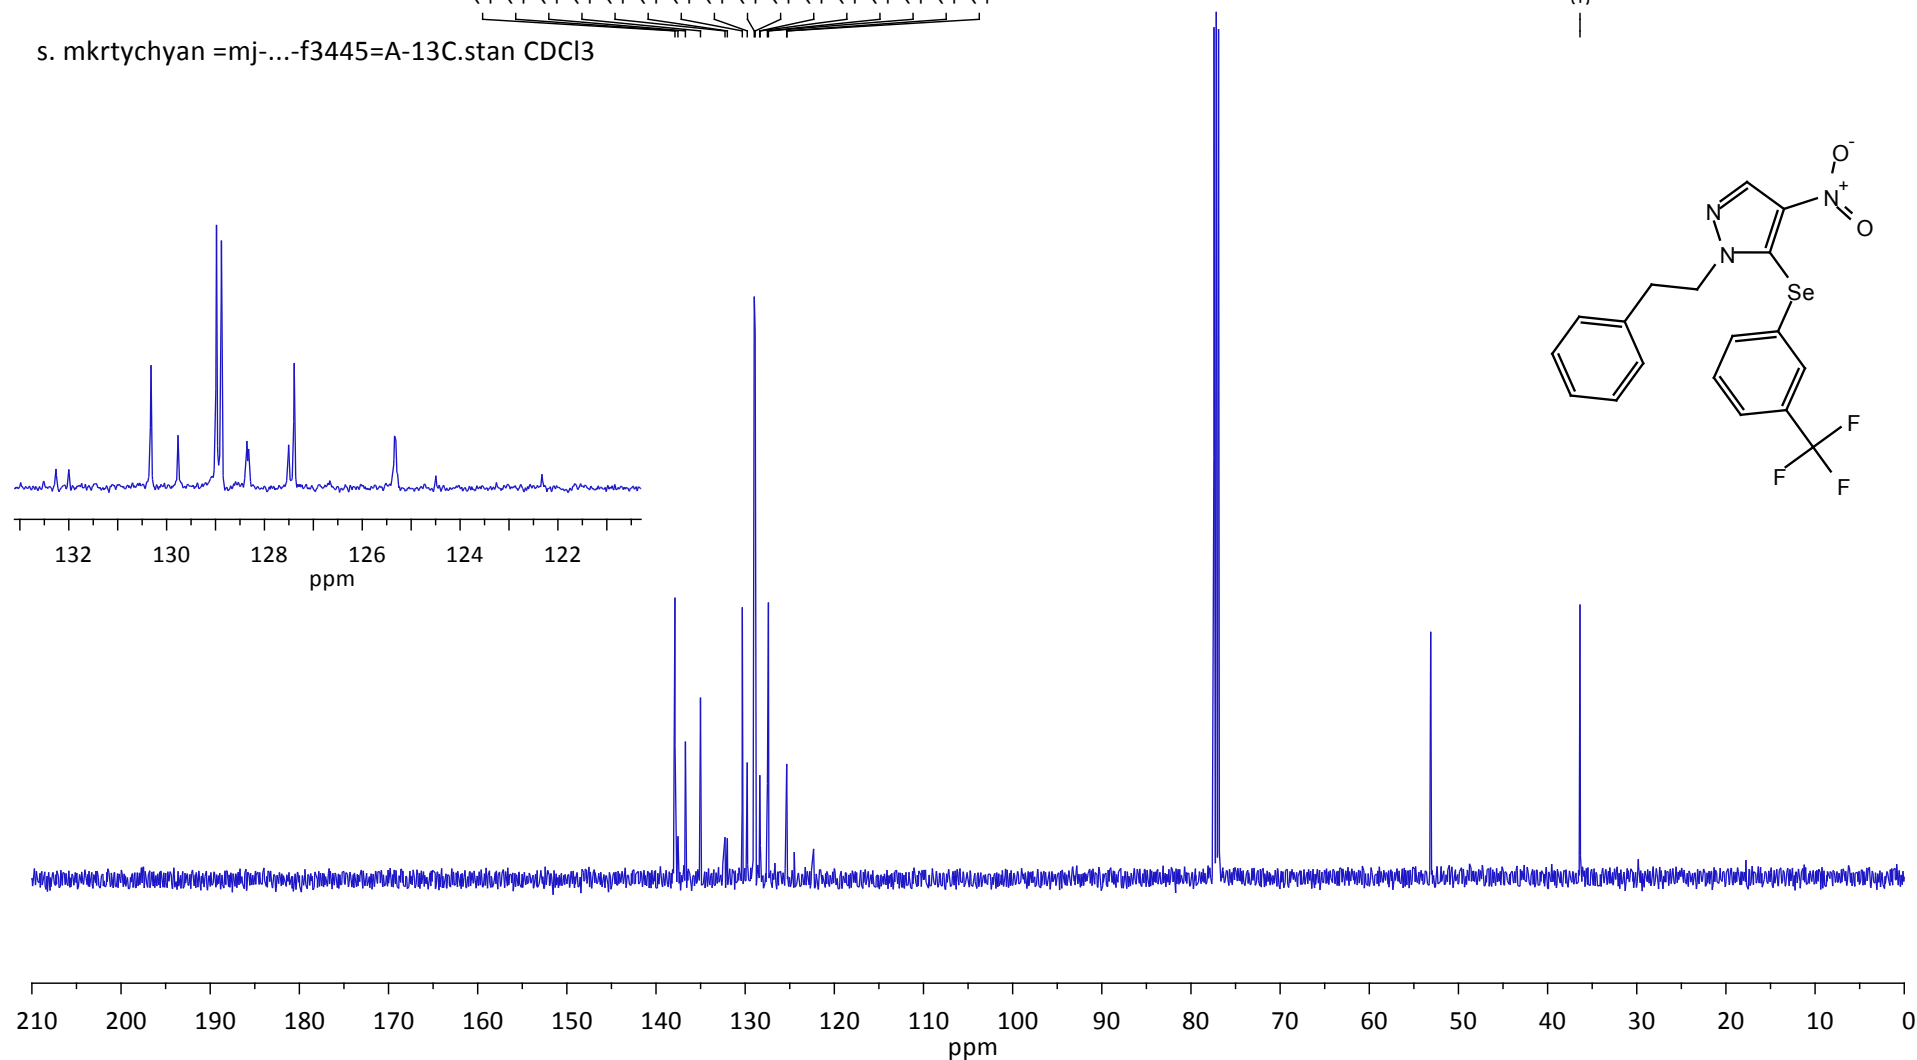

|                        |                                              |
|------------------------|----------------------------------------------|
| Comment                | s. mkrtychyan =mj-...-f3445=A-13C.stan CDCl3 |
| Number of Scans        | 256                                          |
| Spectrometer Frequency | 125.76                                       |
| Spectral Width         | 36057.7                                      |
| Spectral Size          | 65536                                        |

Compound **2b**

8.262  
7.287  
7.283  
7.275  
7.260  
7.247  
7.244  
7.055  
7.046  
7.039  
7.029  
7.027

4.609

3.125

s. mkrtyan =mj...-f4749=1H.stan CDCl3

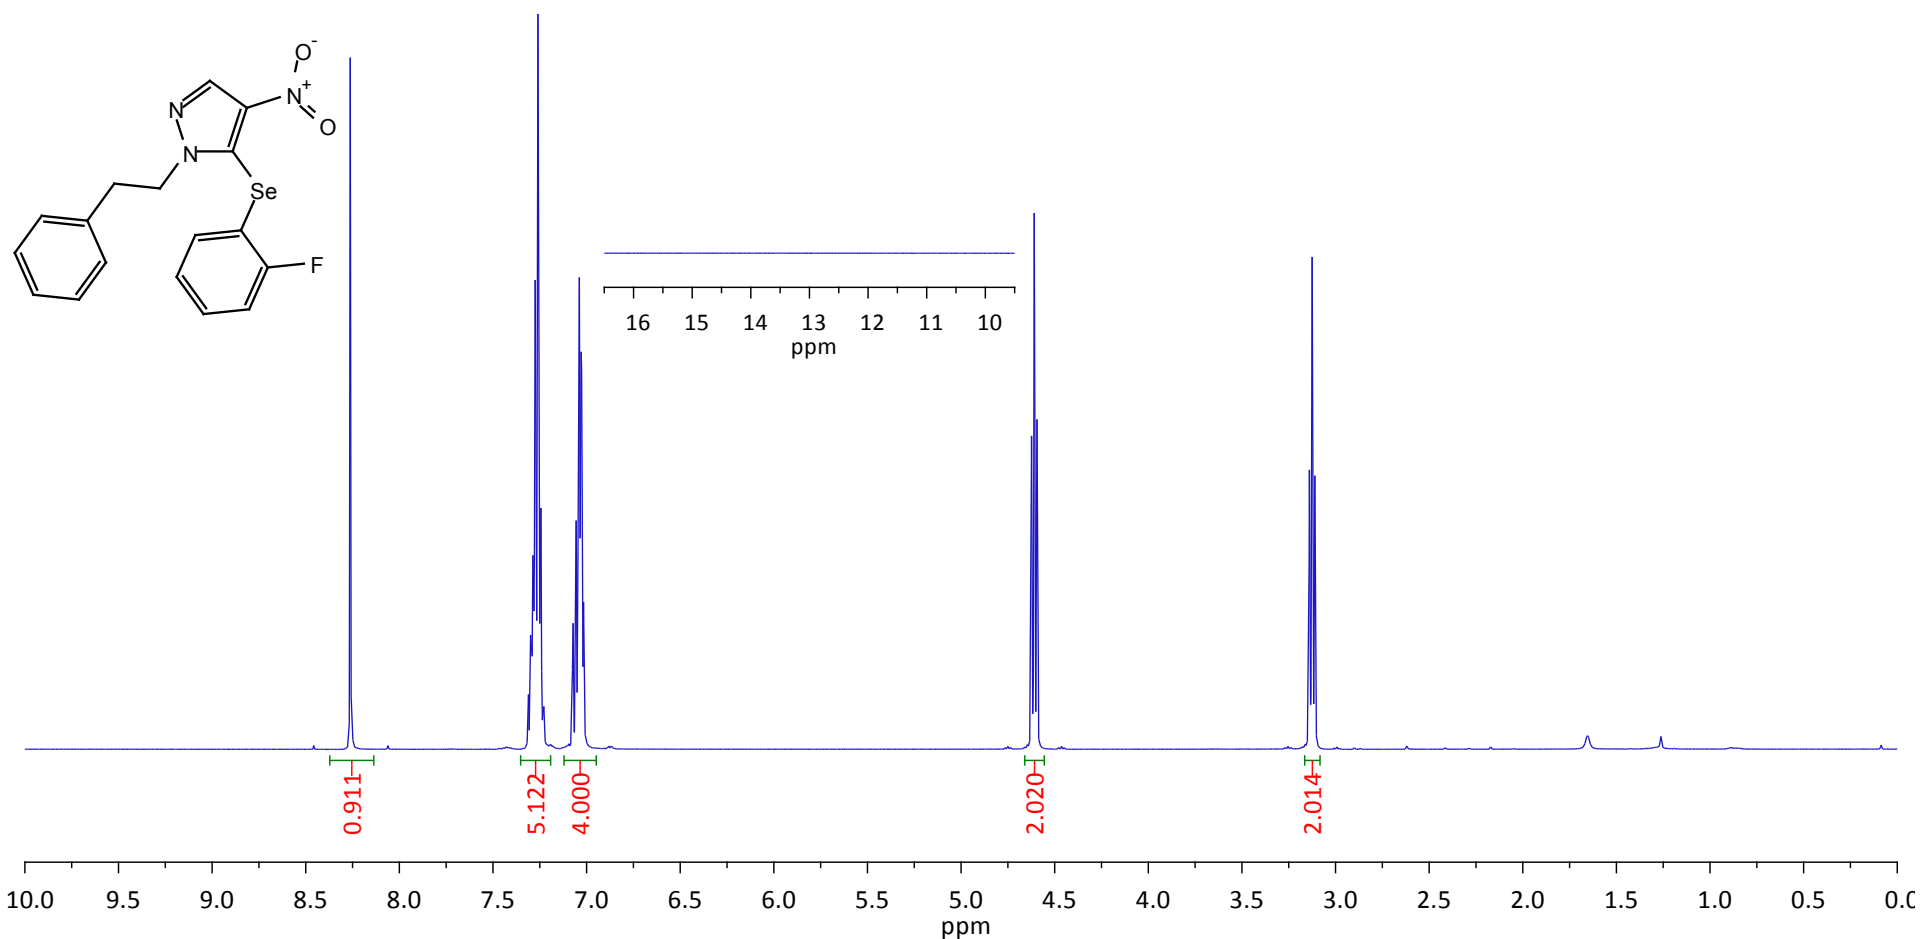

Comment s. mkrtyan =mj...-f4749=1H.stan CDCl3  
 Number of Scans 24  
 Spectrometer Frequency 500.13  
 Spectral Width 12335.5  
 Spectral Size 65536

Compound **2b**

s. mkrtyan =mj...-f4749=A-13C.stan CDCl<sub>3</sub>

162.202  
160.252  
137.666  
136.868  
134.407  
131.074  
131.012  
128.920  
127.286  
125.483  
125.456  
116.226  
116.039  
115.223  
115.053

— 53.043

— 36.395

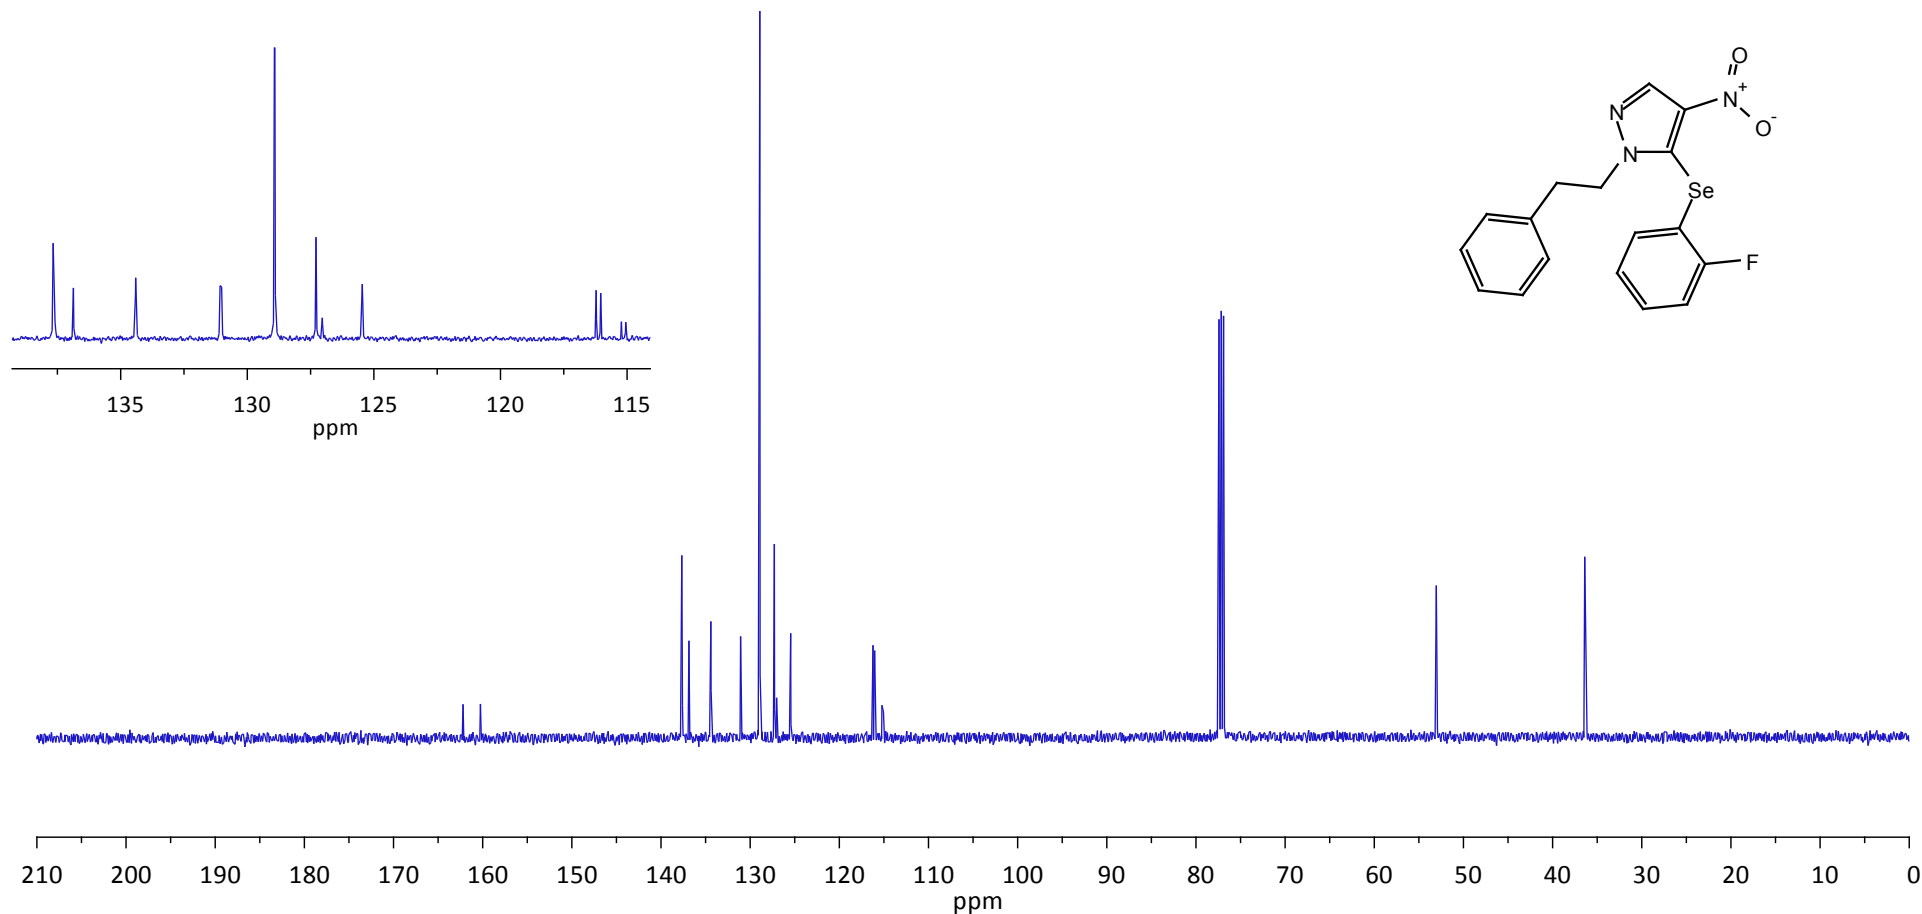

|                        |                                                      |
|------------------------|------------------------------------------------------|
| Comment                | s. mkrtyan =mj...-f4749=A-13C.stan CDCl <sub>3</sub> |
| Number of Scans        | 256                                                  |
| Spectrometer Frequency | 125.76                                               |
| Spectral Width         | 36057.7                                              |
| Spectral Size          | 65536                                                |

Compound **2c**

s. mkrtyan =mj-59-2734=1H.stan CDCl3

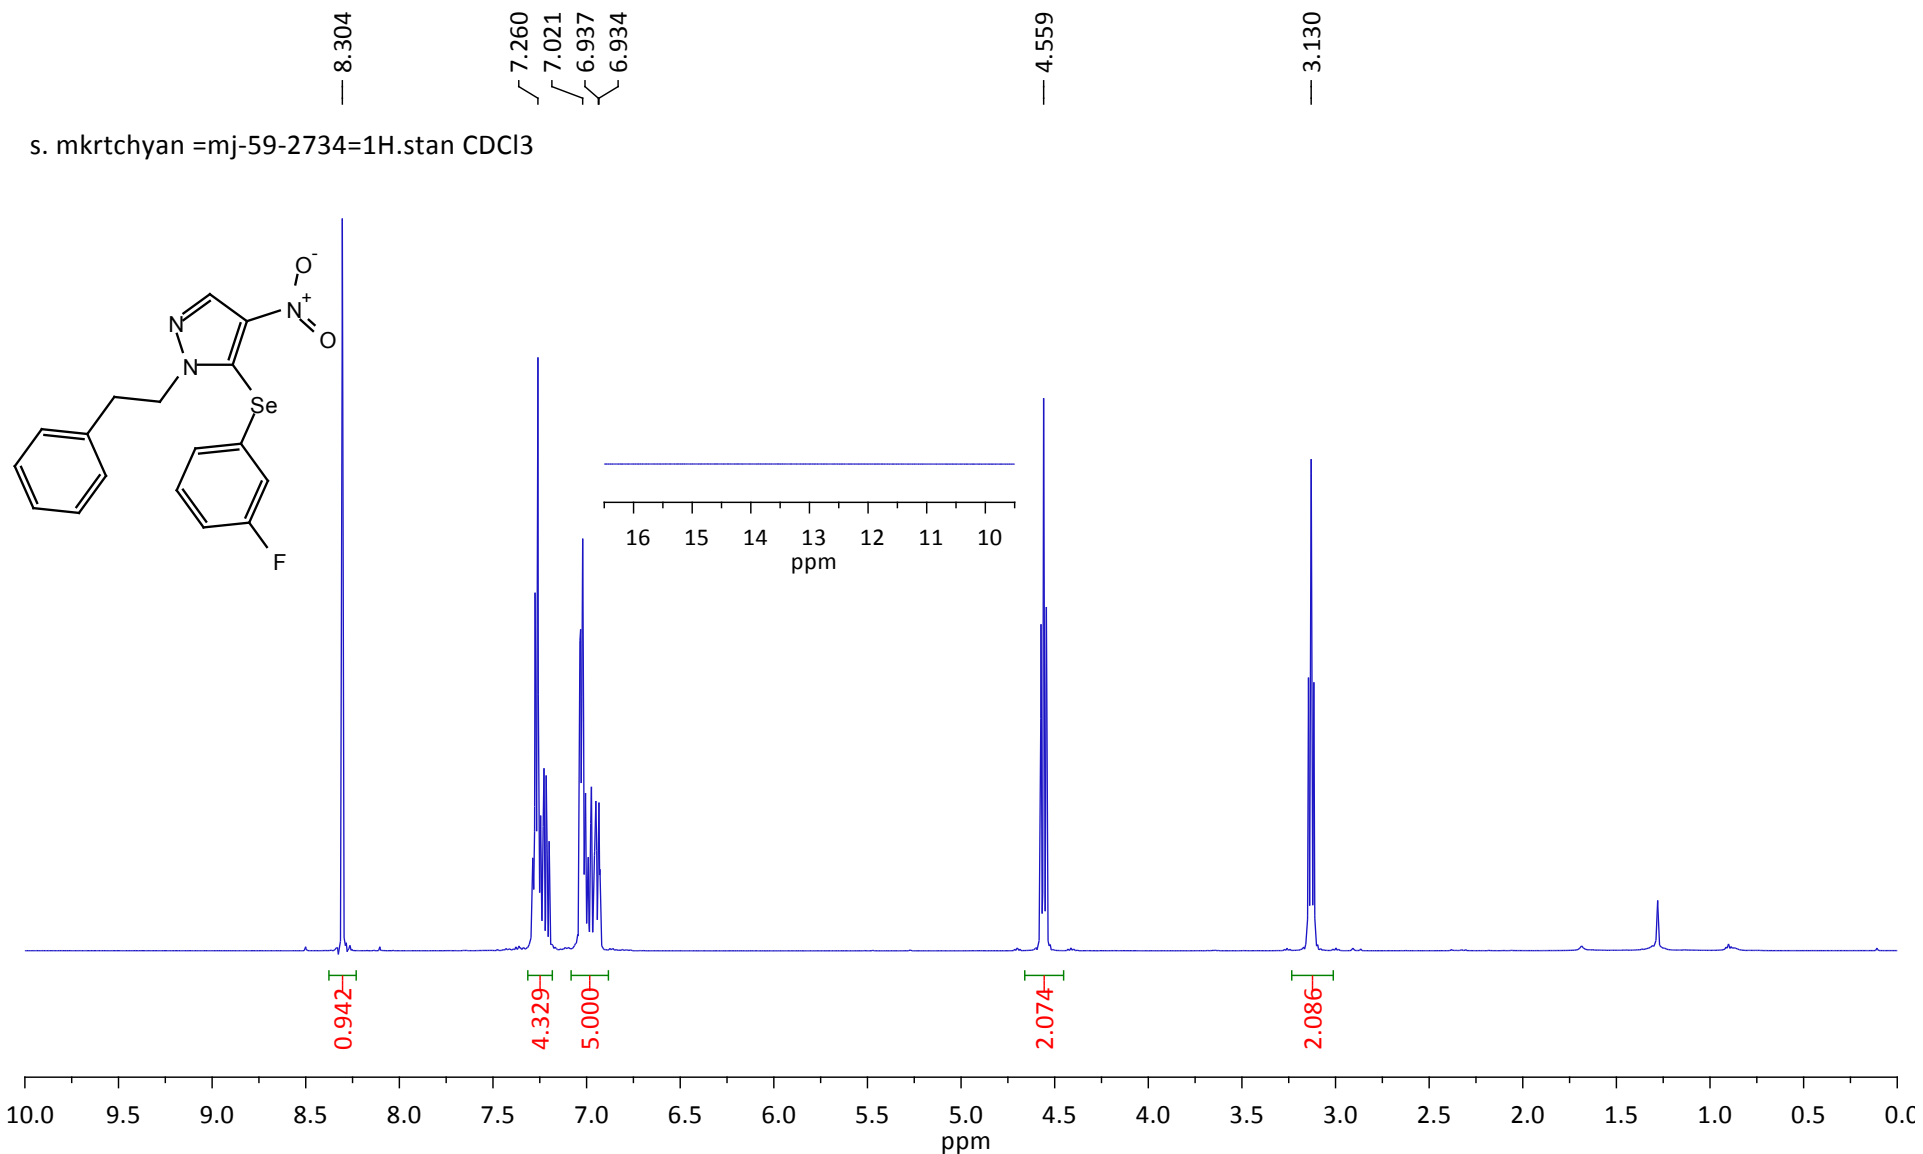

|                        |                                      |
|------------------------|--------------------------------------|
| Comment                | s. mkrtyan =mj-59-2734=1H.stan CDCl3 |
| Number of Scans        | 24                                   |
| Spectrometer Frequency | 500.13                               |
| Spectral Width         | 12335.5                              |
| Spectral Size          | 65536                                |

Compound 2c

s. mkrtyan =mj-59-2734=A-13C.stan CDCl3

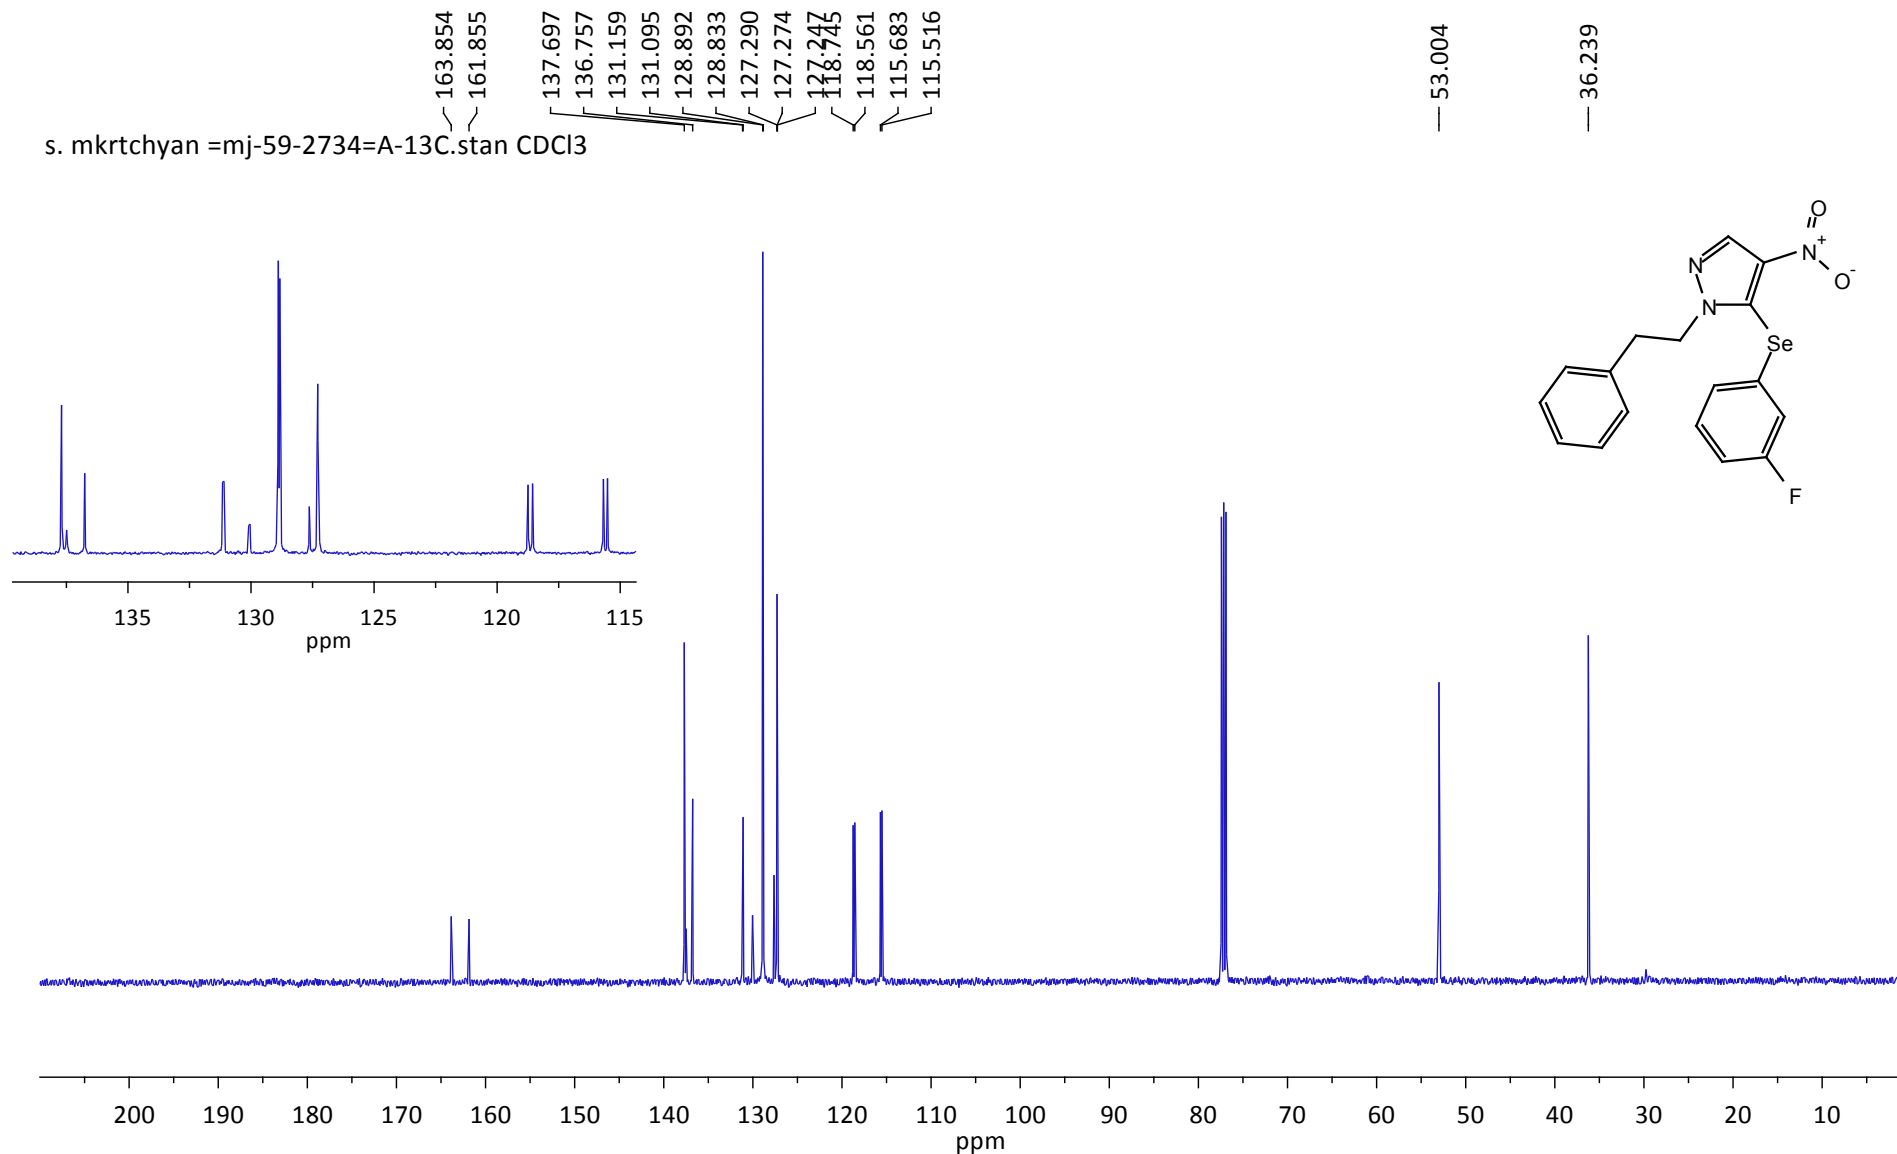

|                        |                                         |
|------------------------|-----------------------------------------|
| Comment                | s. mkrtyan =mj-59-2734=A-13C.stan CDCl3 |
| Number of Scans        | 512                                     |
| Spectrometer Frequency | 125.76                                  |
| Spectral Width         | 36057.7                                 |
| Spectral Size          | 65536                                   |



Compound **2d**

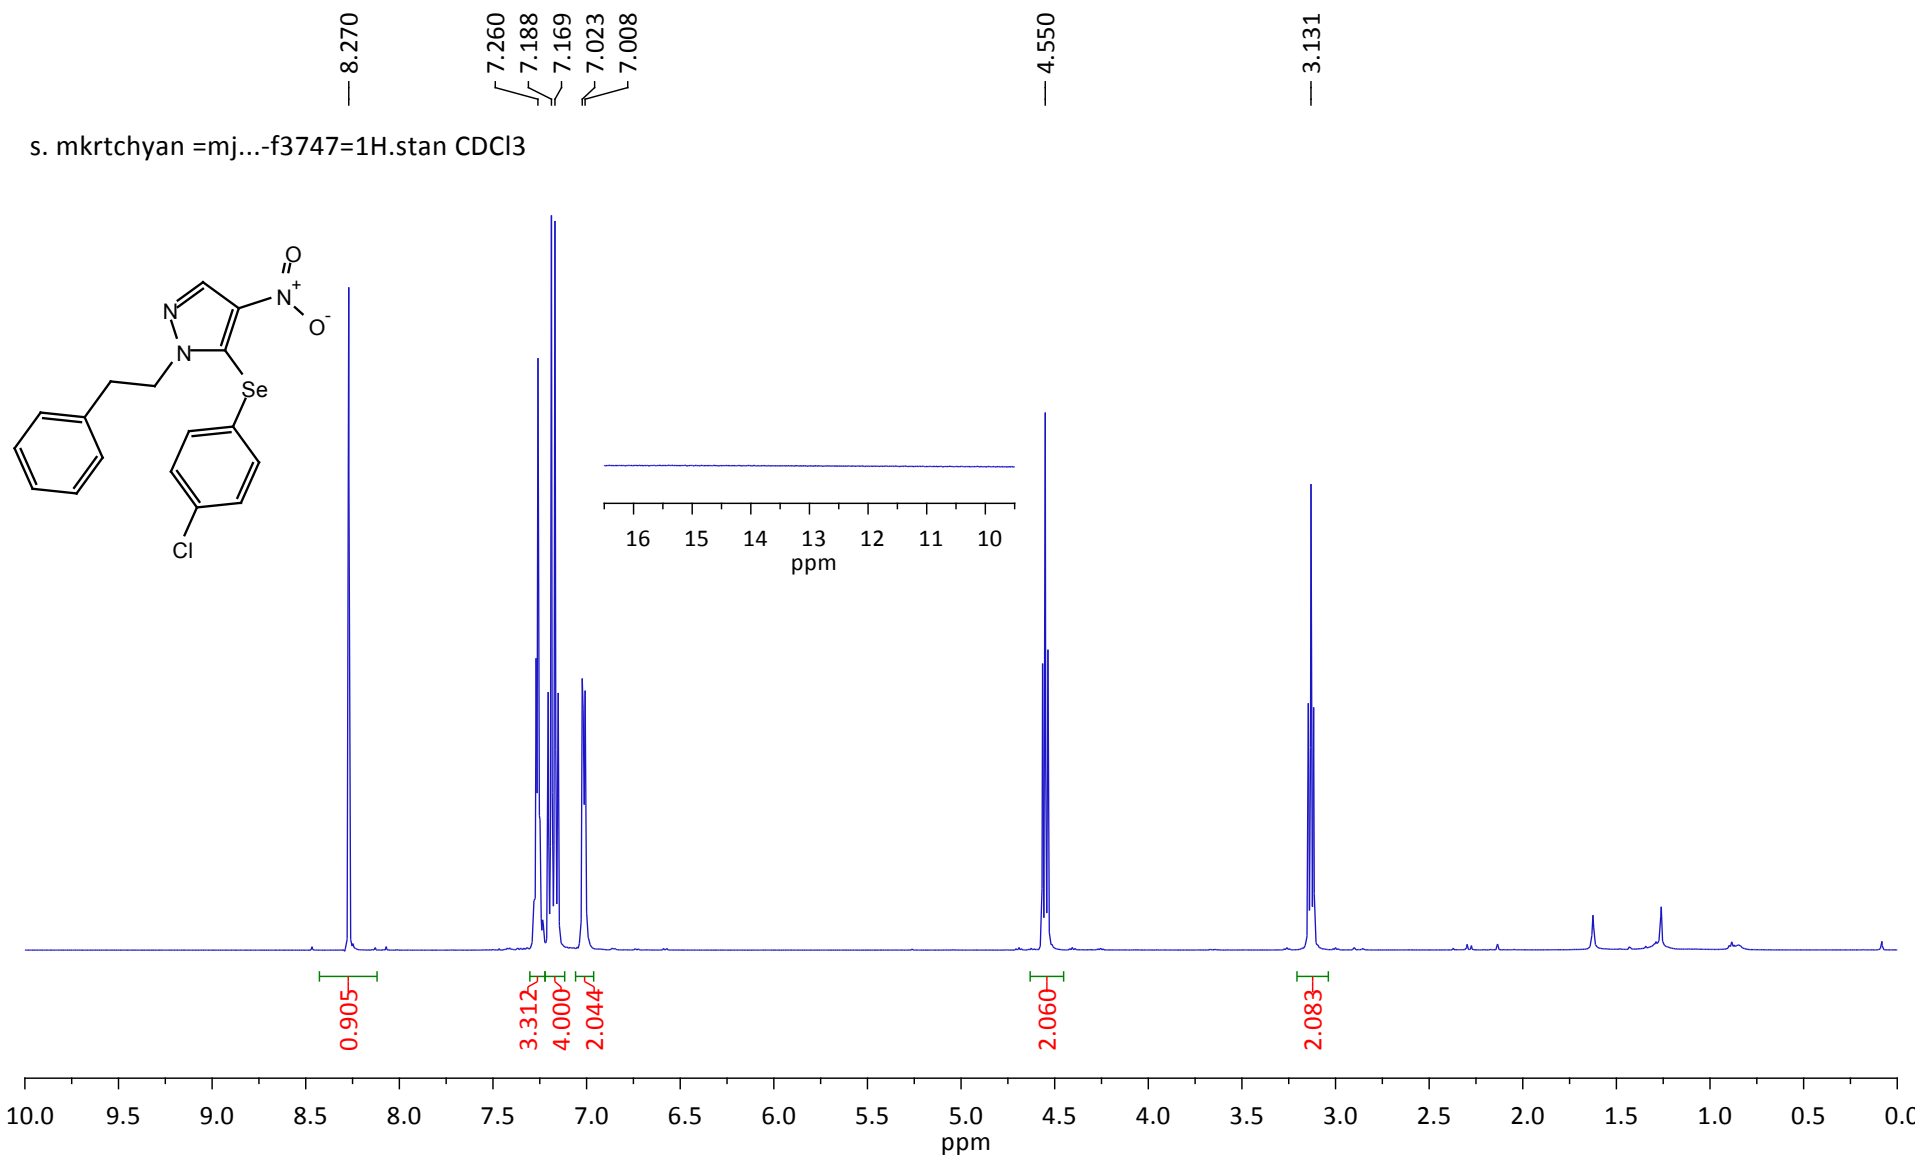

Comment s. mkrtyan =mj...-f3747=1H.stan CDCl3  
 Number of Scans 24  
 Spectrometer Frequency 500.13  
 Spectral Width 12335.5  
 Spectral Size 65536

Compound 2d

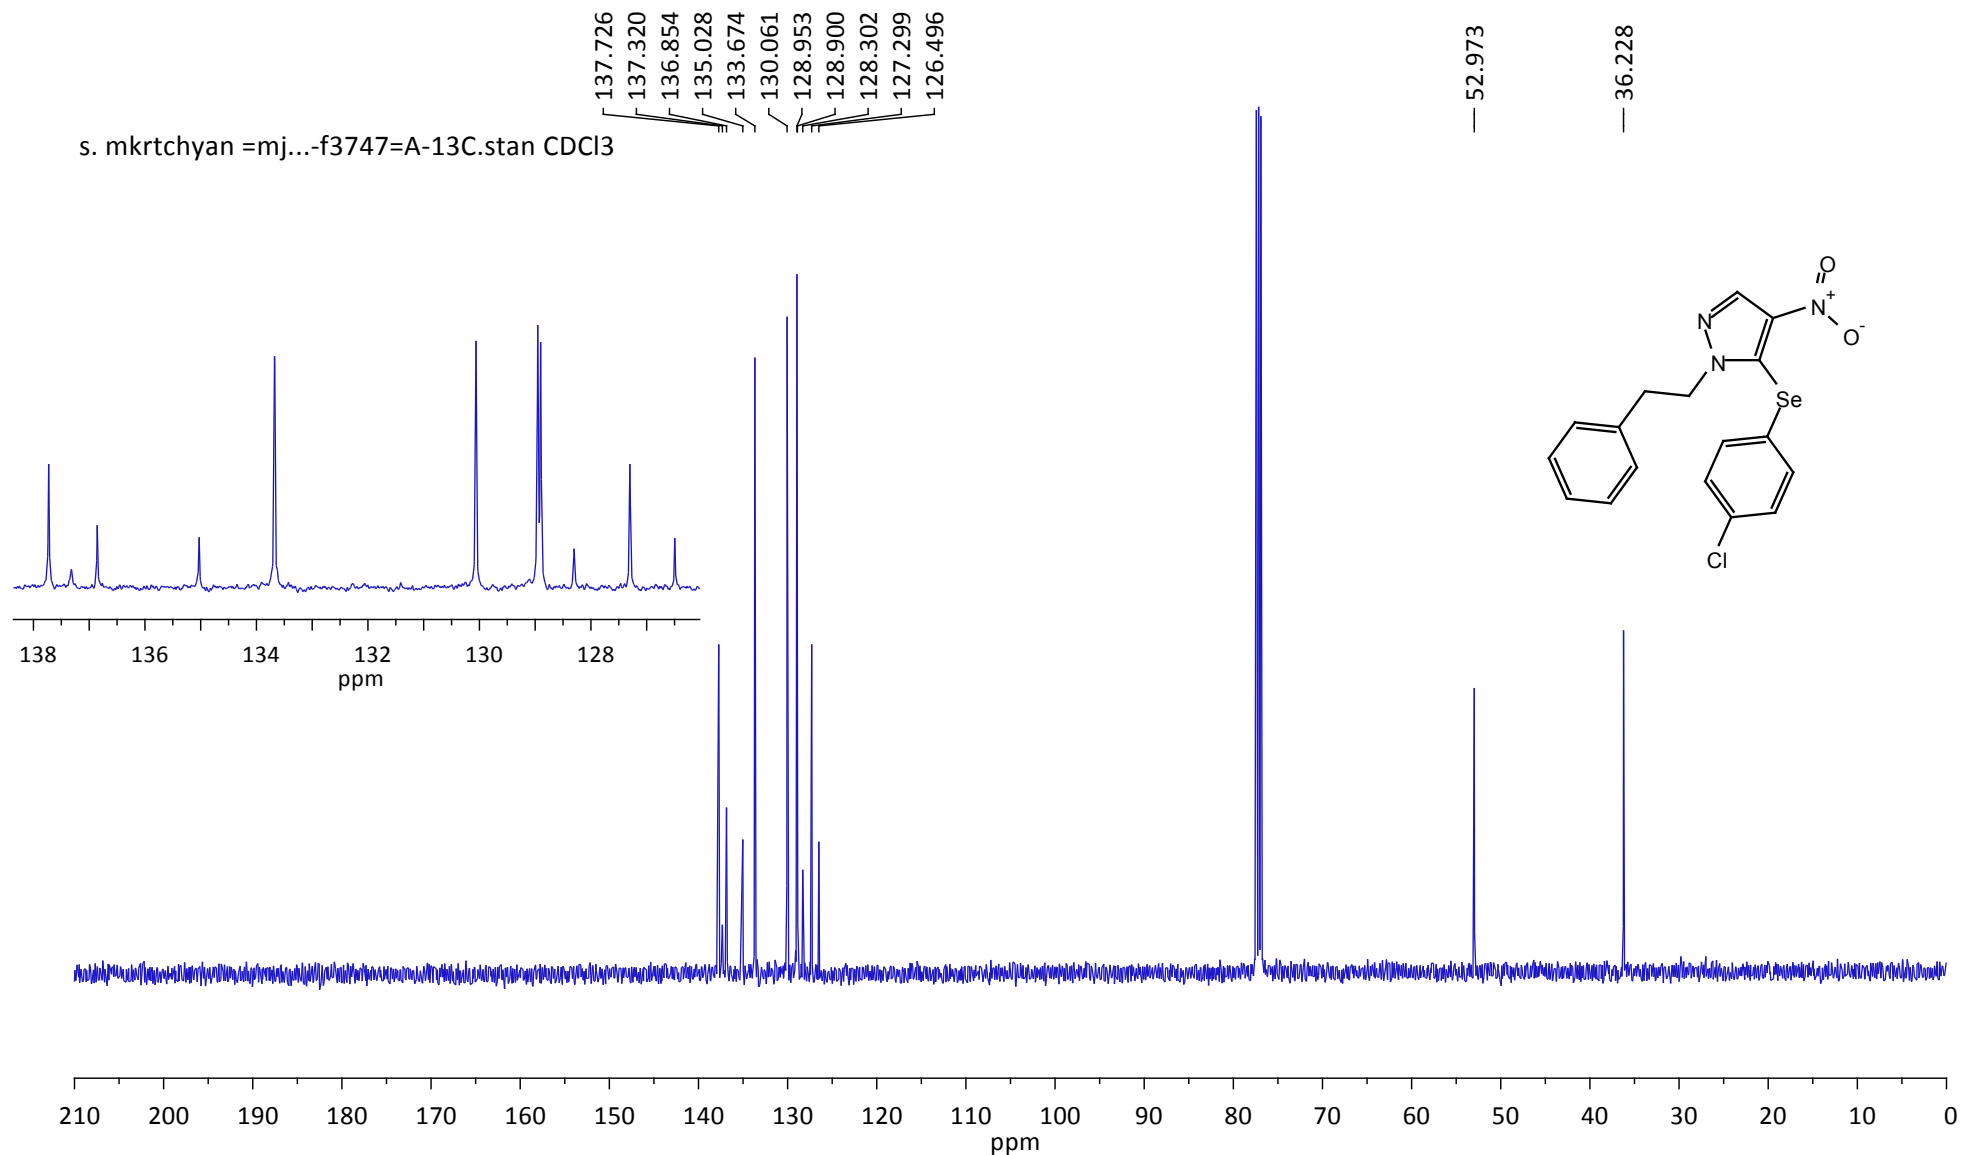

|                        |                                          |
|------------------------|------------------------------------------|
| Comment                | s. mkrtyan =mj...-f3747=A-13C.stan CDCl3 |
| Number of Scans        | 256                                      |
| Spectrometer Frequency | 125.76                                   |
| Spectral Width         | 36057.7                                  |
| Spectral Size          | 65536                                    |

Compound **2e**

s. mkrtyan =mj...f3742=1H.stan CDCl3

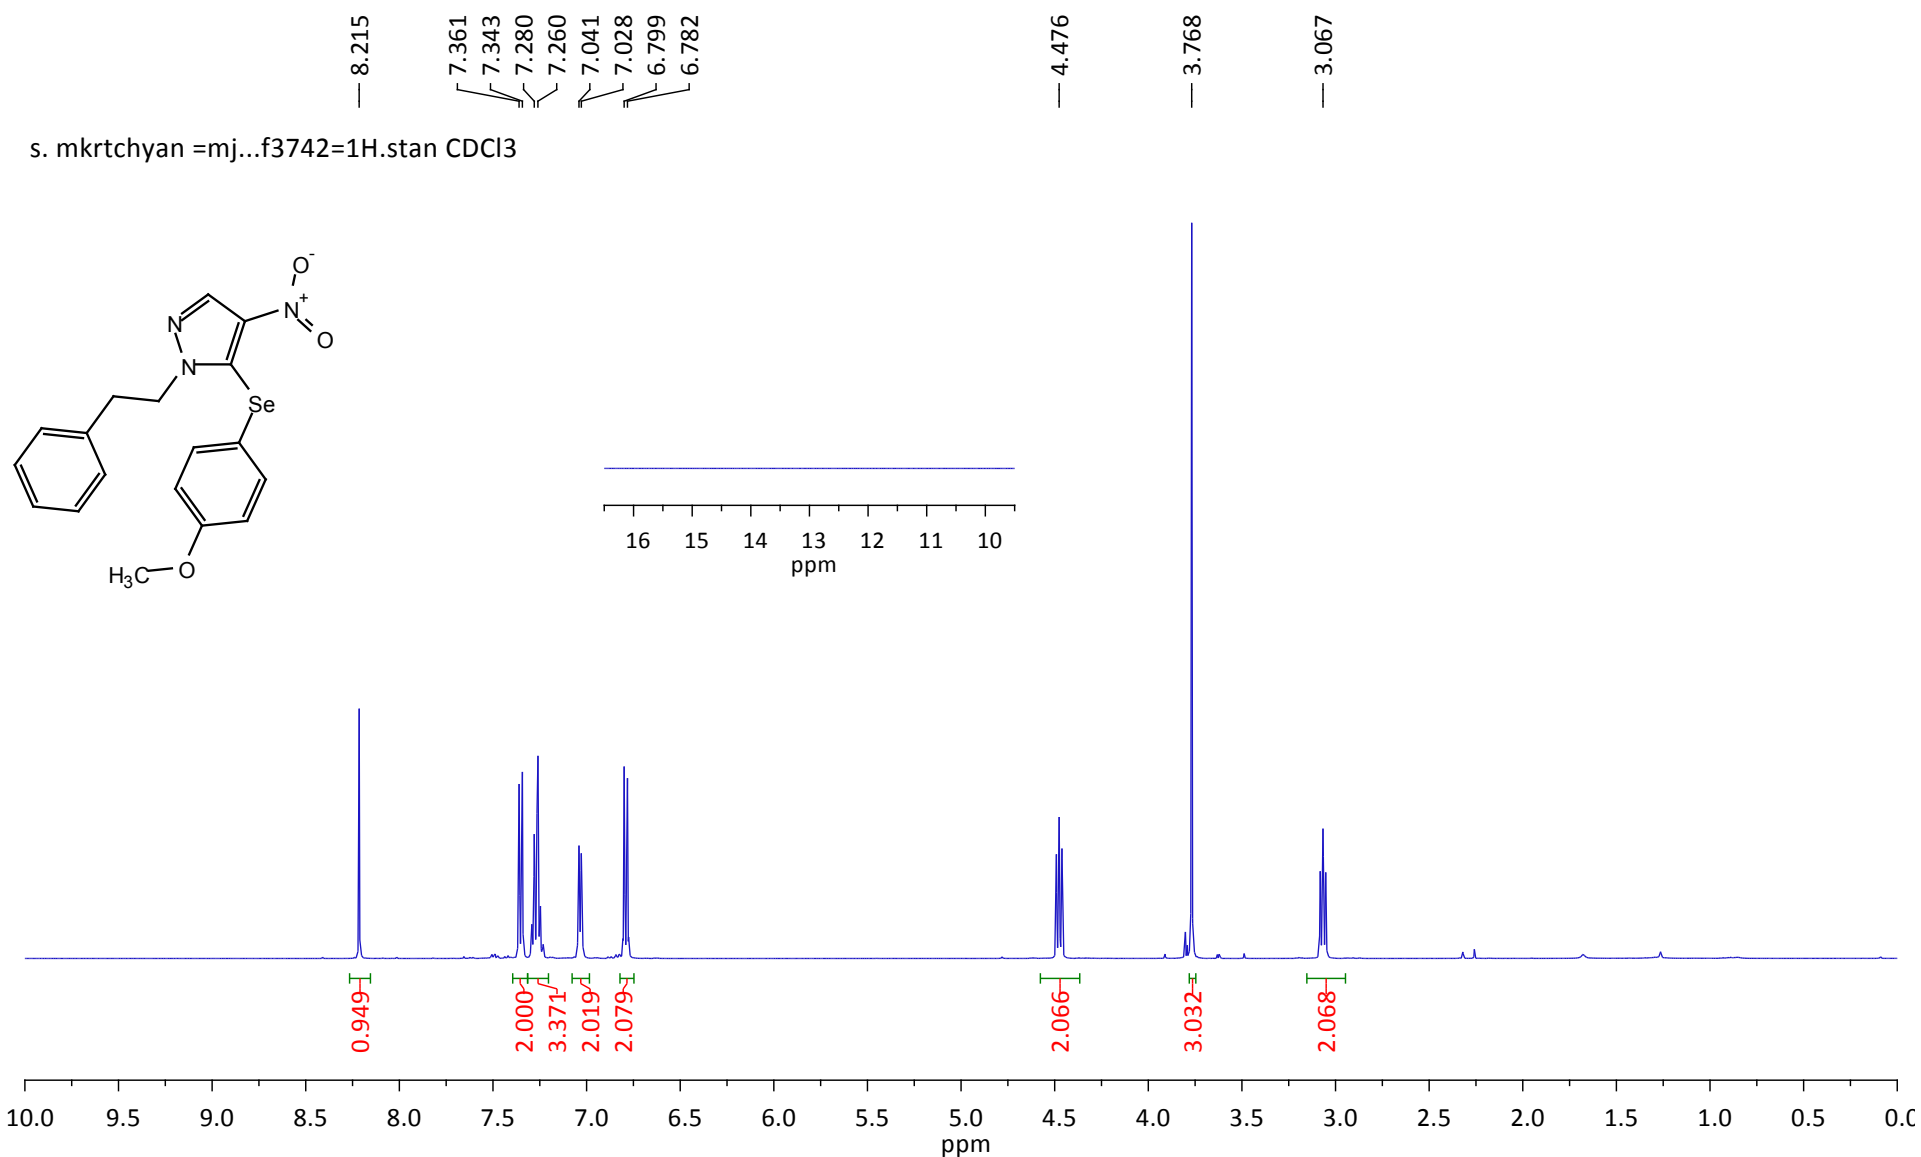

Comment s. mkrtyan =mj...f3742=1H.stan CDCl3  
 Number of Scans 24  
 Spectrometer Frequency 500.13  
 Spectral Width 12335.5  
 Spectral Size 65536

Compound 2e

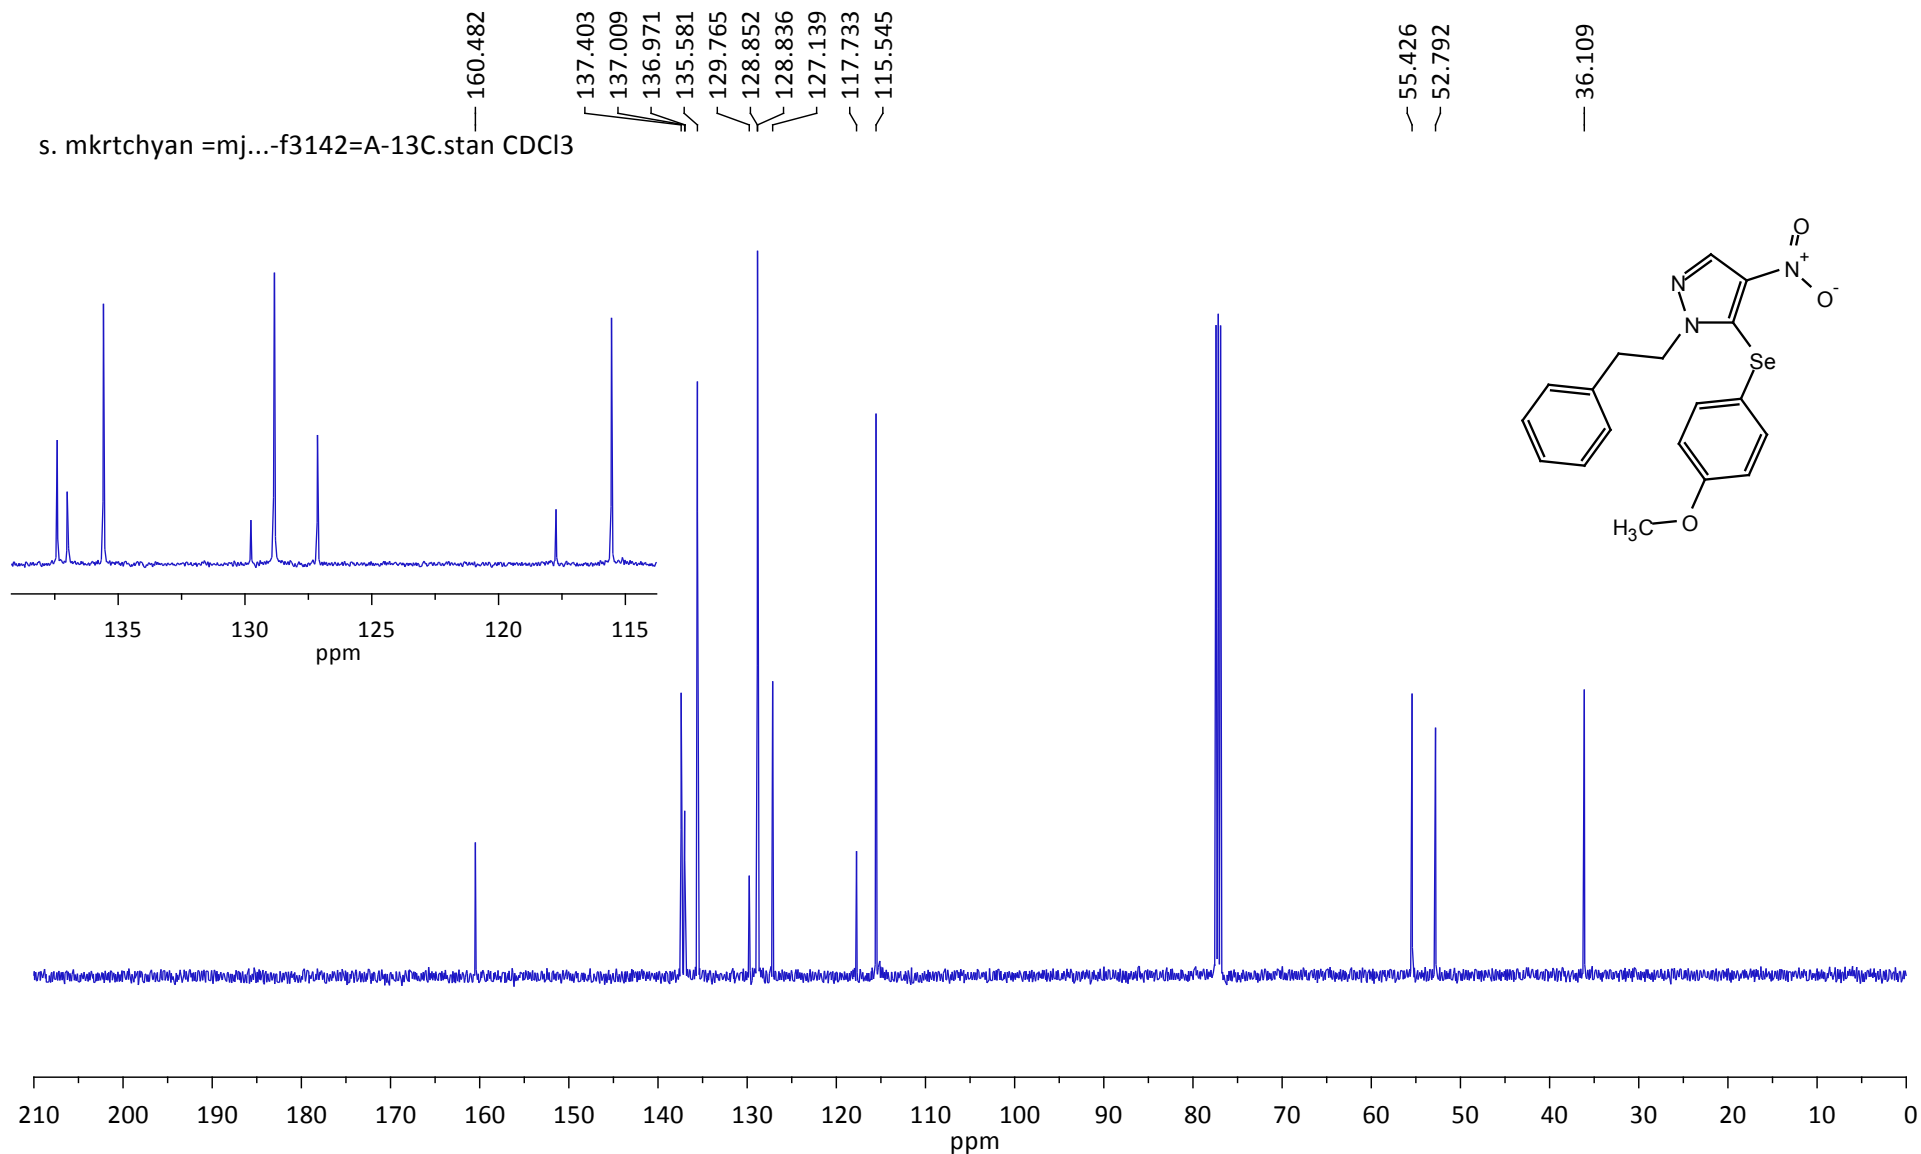

Comment s. mkrtyan =mj...-f3142=  
A-13C.stan CDCl3 {C:\NMR\_Data\Service\CBMM} nmrsu 9

Number of Scans 256

Spectrometer Frequency 125.76

Spectral Width 36057.7

Compound **2f**

8.335  
8.133  
8.130  
8.124  
8.121  
7.700  
7.697  
7.249  
7.235  
7.058  
7.044  
6.978  
6.969  
6.962  
6.953

4.538

3.166

s. mkrtyan =mj60=1H.stan CDCl3

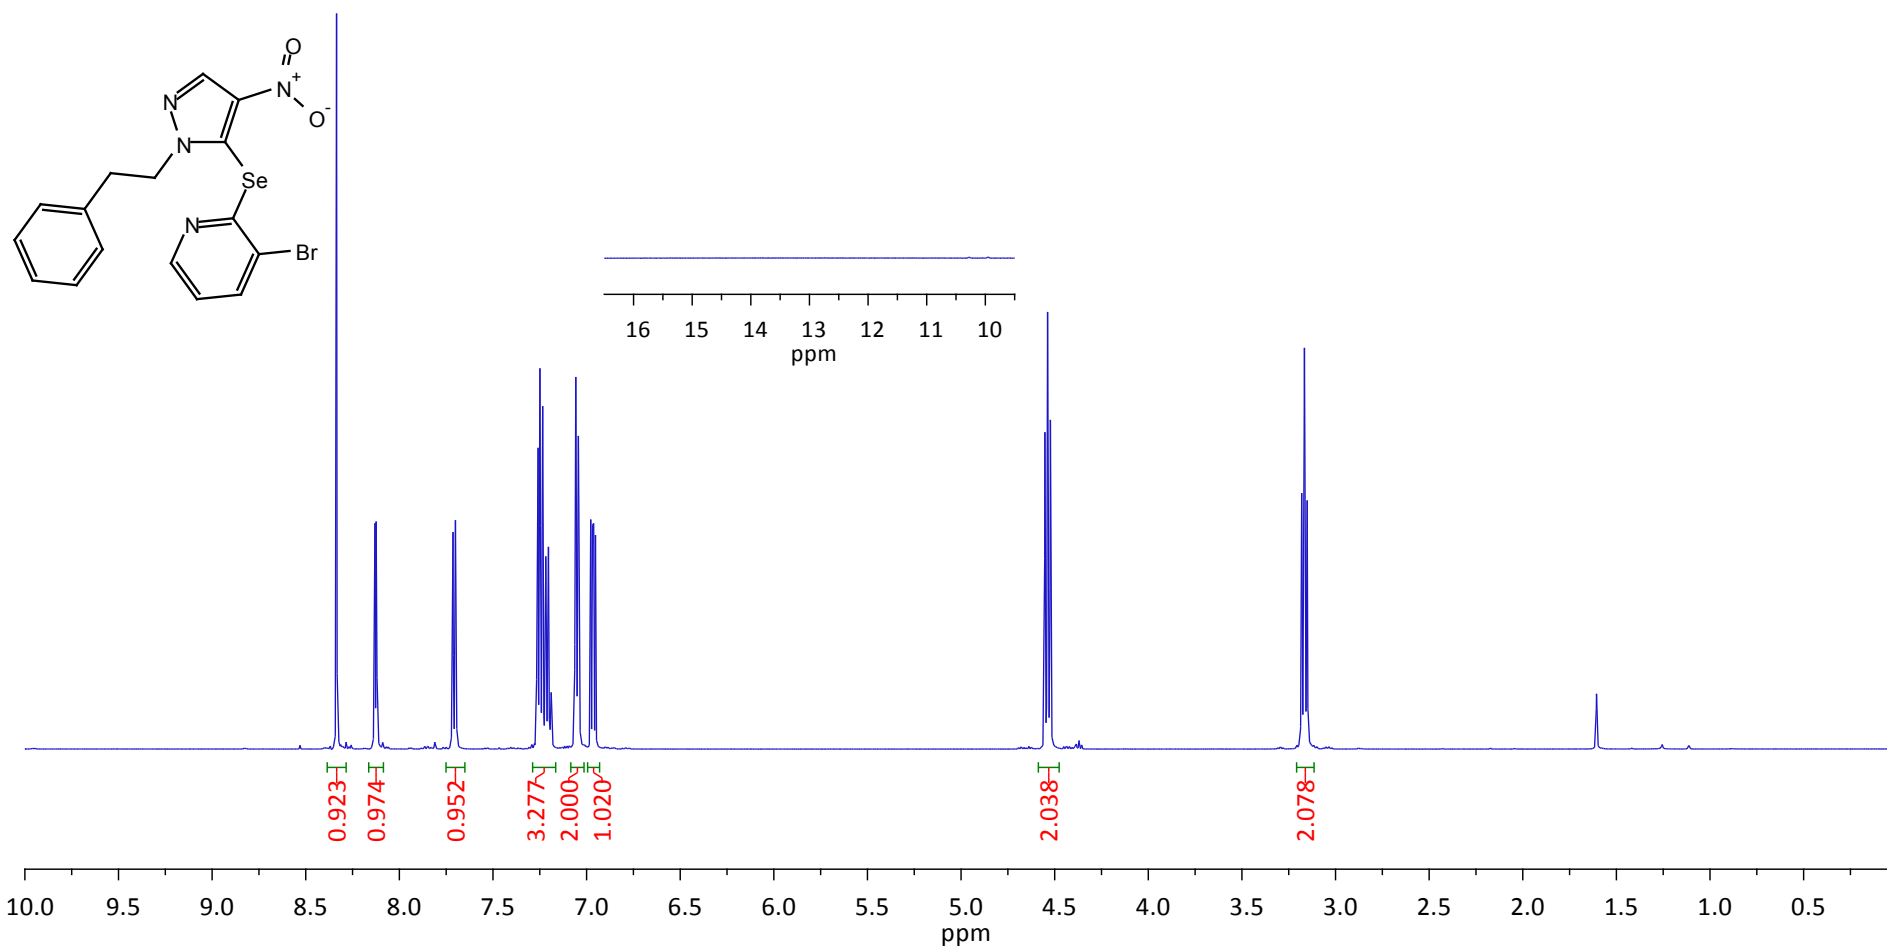

Comment s. mkrtyan =mj60=1H.stan CDCl3  
 Number of Scans 24  
 Spectrometer Frequency 500.13  
 Spectral Width 12335.5  
 Spectral Size 65536

Compound **2f**

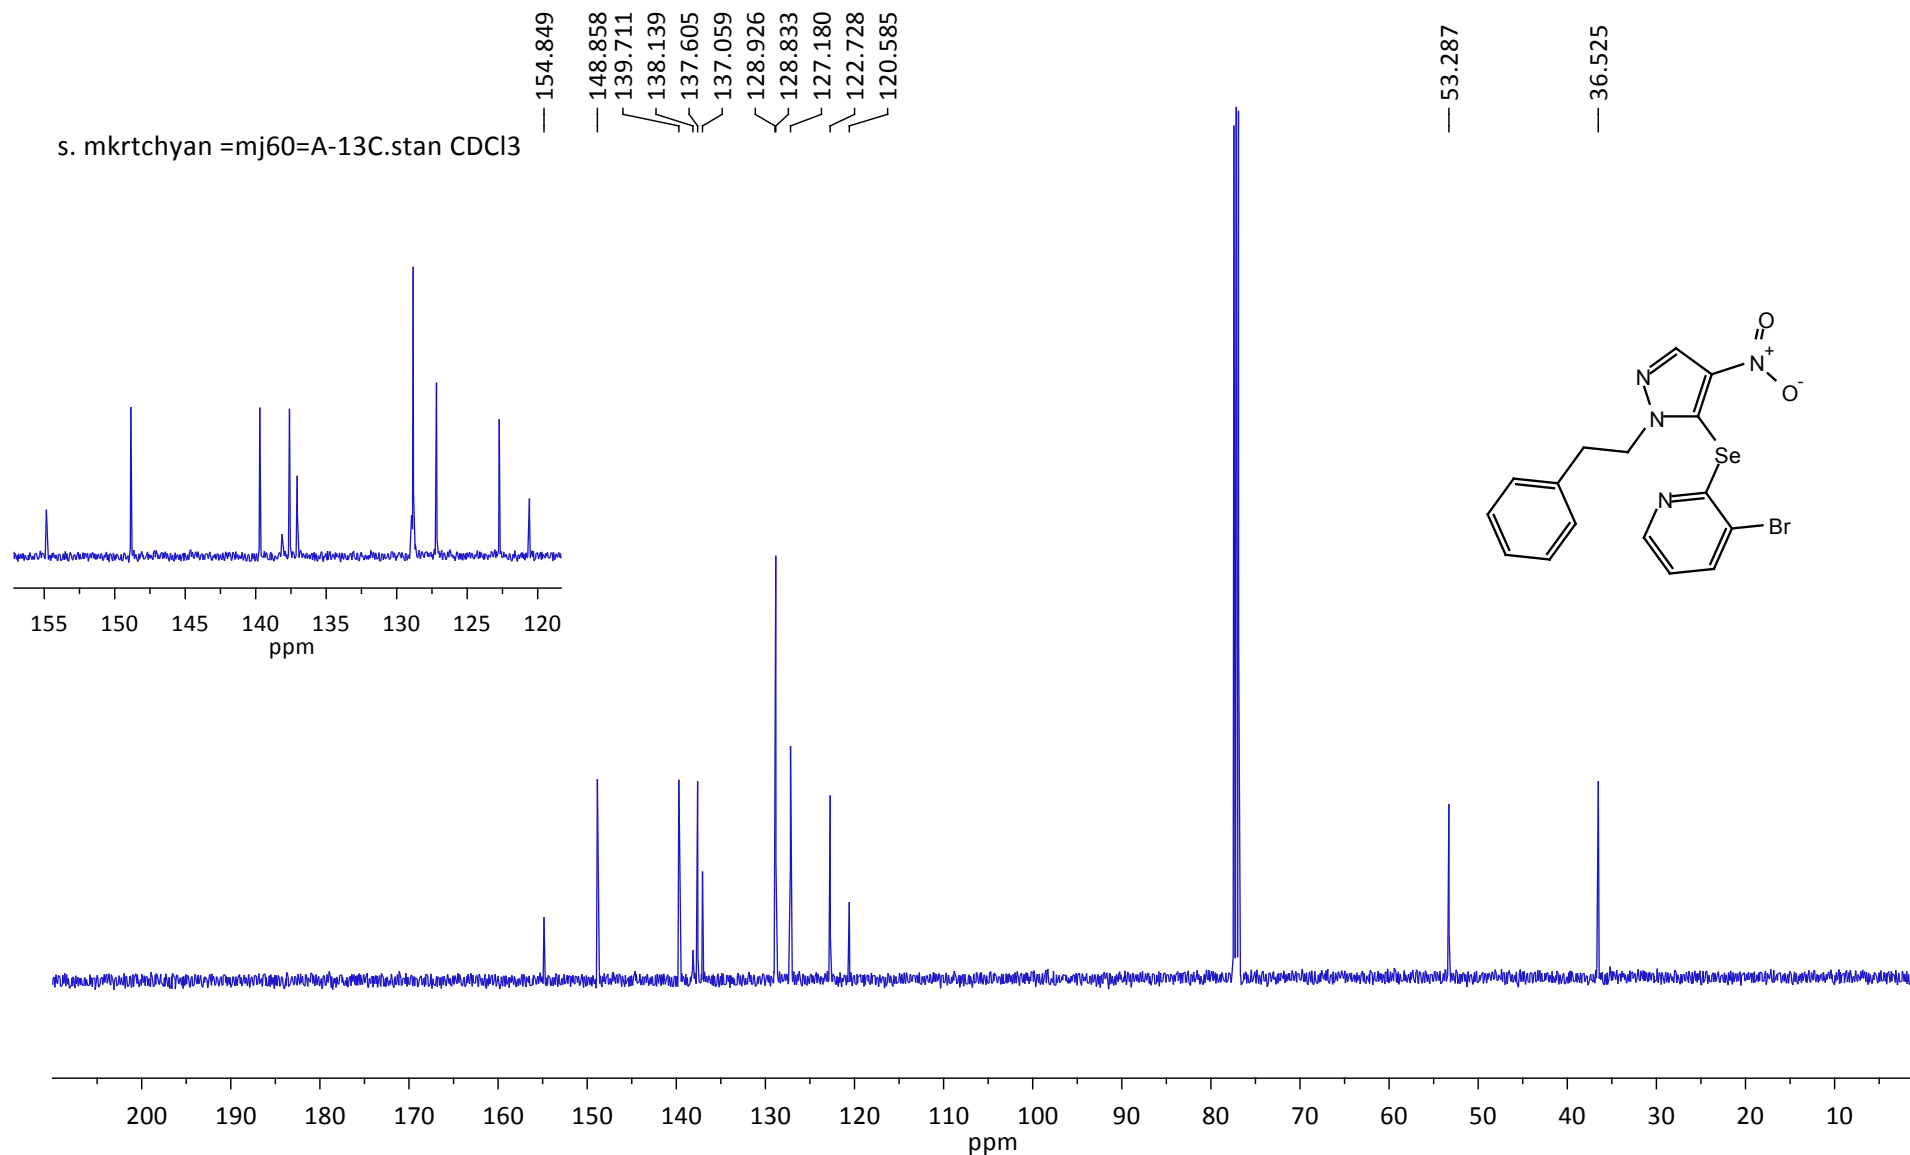

Comment s. mkrtchyan =mj60=  
A-13C.stan CDCl<sub>3</sub> {C:\NMR\_Data\Service\CBMM} nmrsu 6

Number of Scans 512  
Spectrometer Frequency 125.76  
Spectral Width 36057.7

Compound 3a

8.234  
7.348  
7.336  
7.333  
7.322  
7.303  
7.289  
7.273  
7.223  
7.209  
7.138  
7.124  
7.108  
7.089  
7.073  
7.058

4.308

2.601

2.136

mkrtychyan =mj-111-819=1H.stan CDCl3

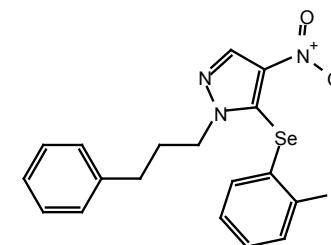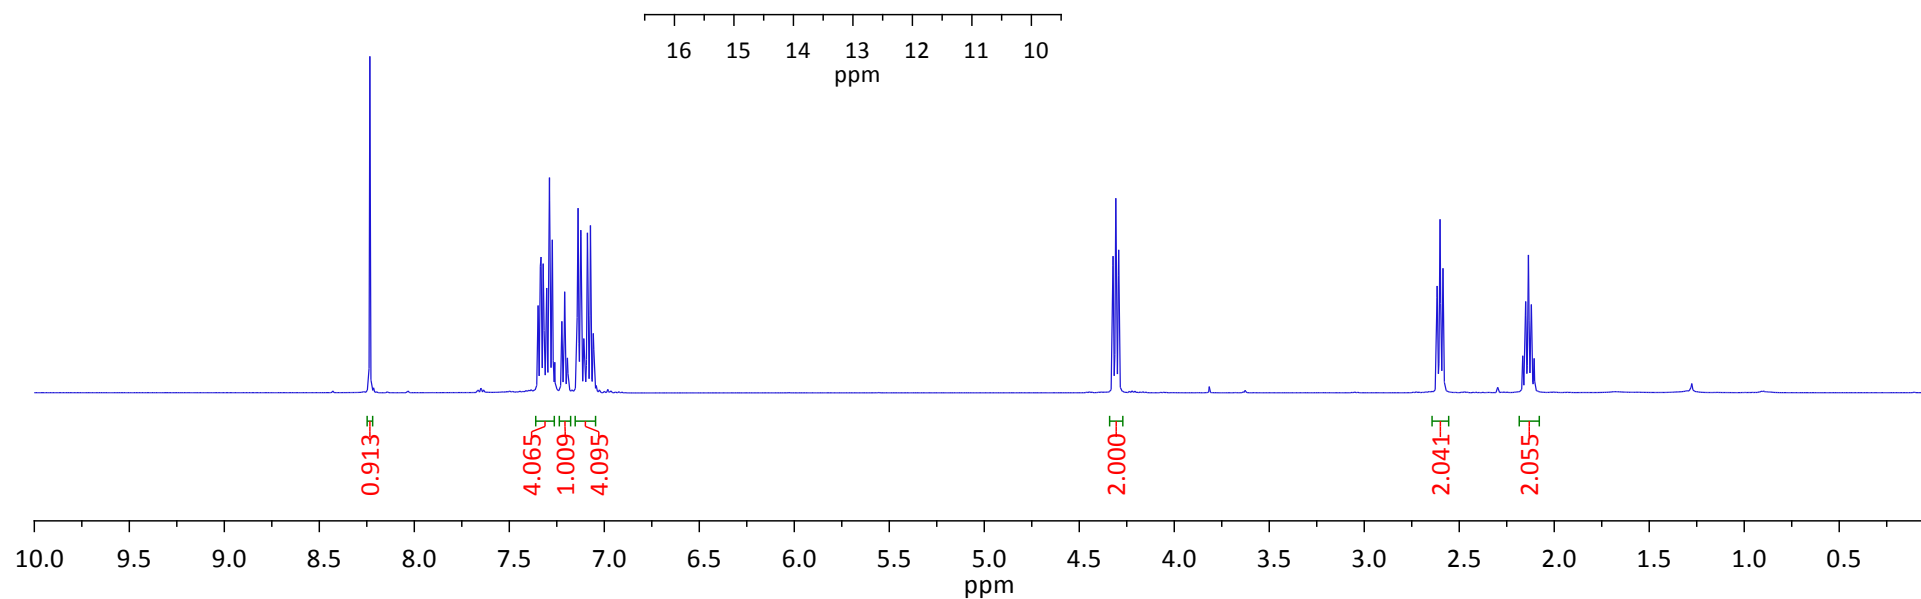

|                        |                                         |
|------------------------|-----------------------------------------|
| Comment                | s. mkrtychyan =mj-111-819=1H.stan CDCl3 |
| Number of Scans        | 24                                      |
| Spectrometer Frequency | 500.13                                  |
| Spectral Width         | 12335.5                                 |
| Spectral Size          | 65536                                   |

Compound 3a

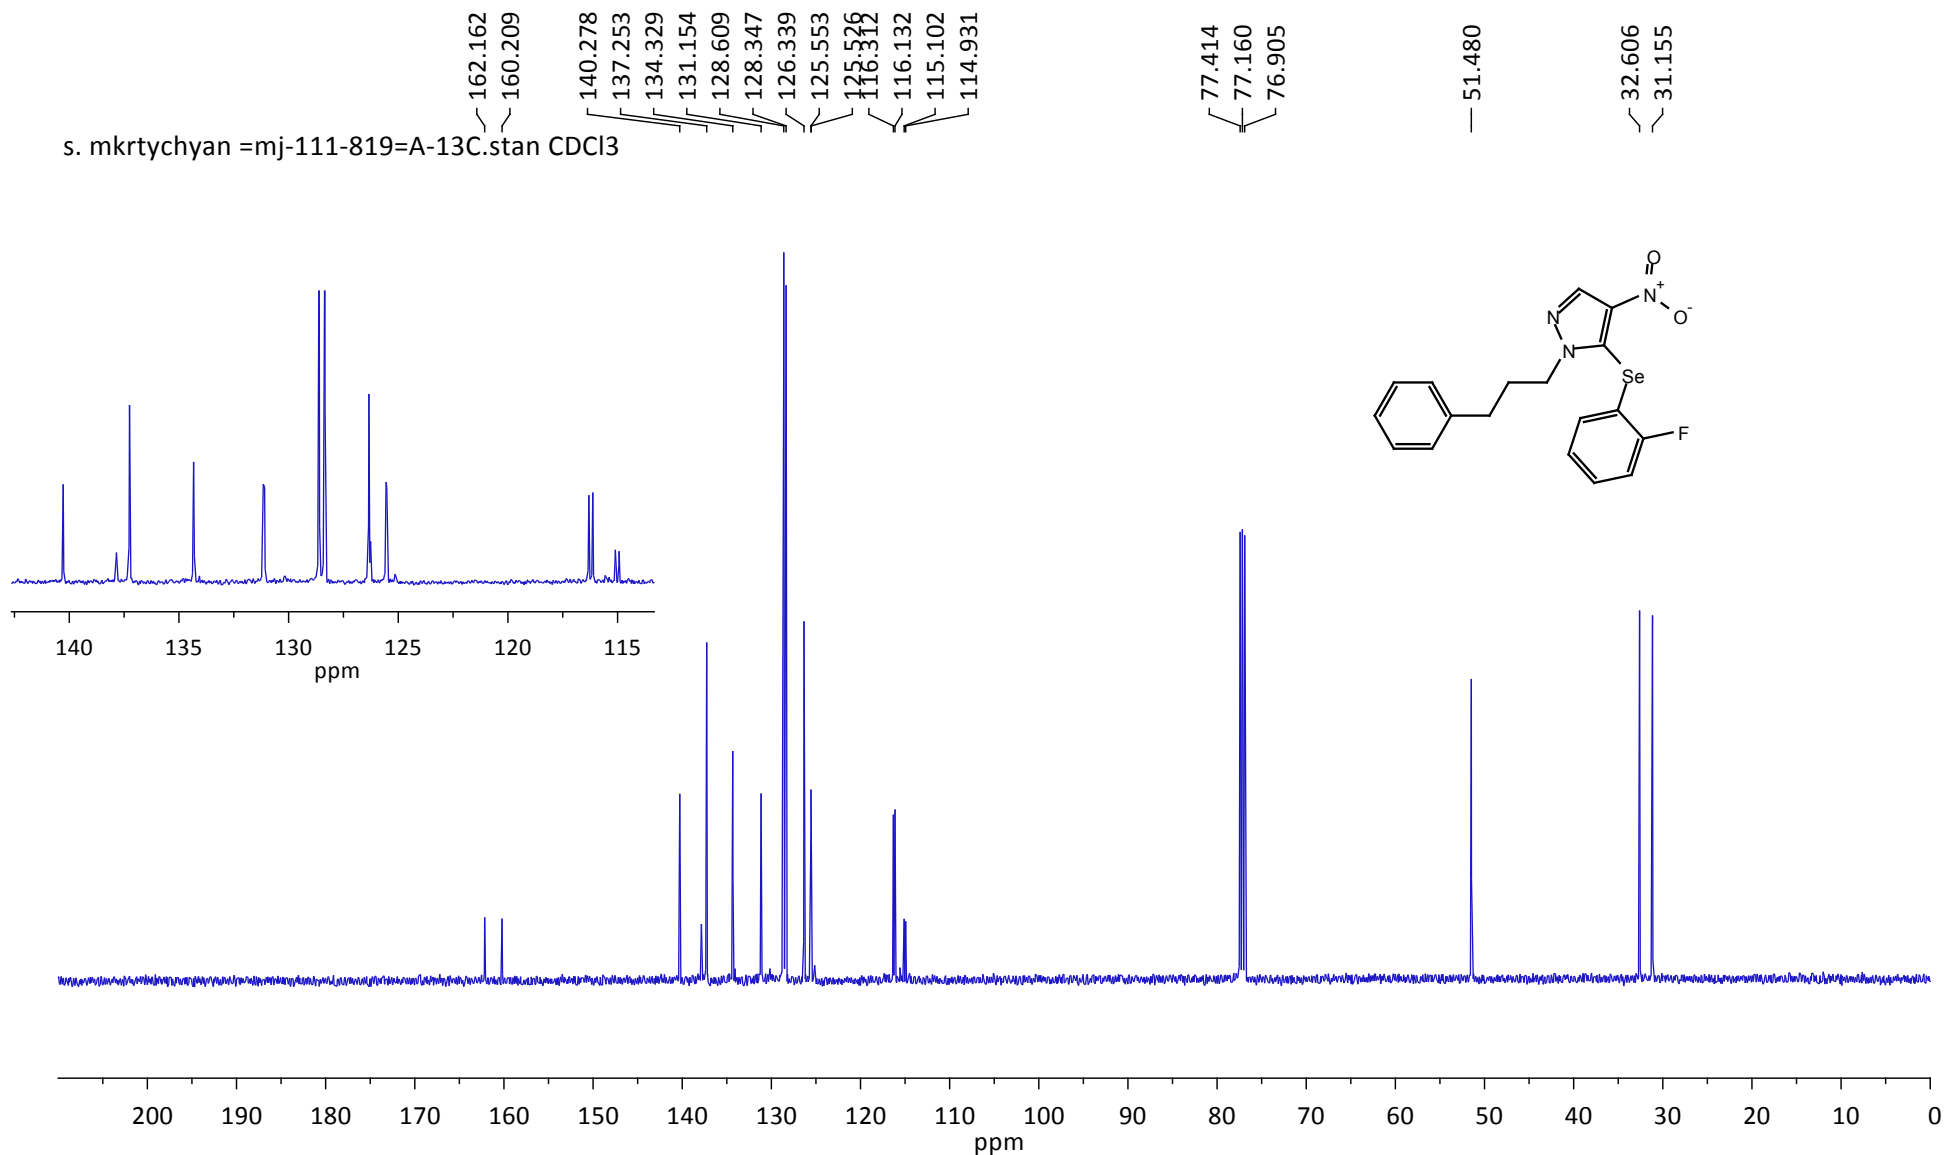

Comment s. mkrtychyan =mj-111-819=A-13C.stan CDCl3  
 Number of Scans 512  
 Spectrometer Frequency 125.76  
 Spectral Width 36057.7  
 Spectral Size 65536



Compound **3b**

8.250  
7.302  
7.288  
7.273  
7.252  
7.240  
7.227  
7.225  
7.213  
7.117  
7.102  
7.094  
7.042  
7.026  
7.022  
7.003  
6.986  
6.981

4.226

2.585

2.110

s. mkrtychyan =mj-112-1017=1H.stan CDCl3

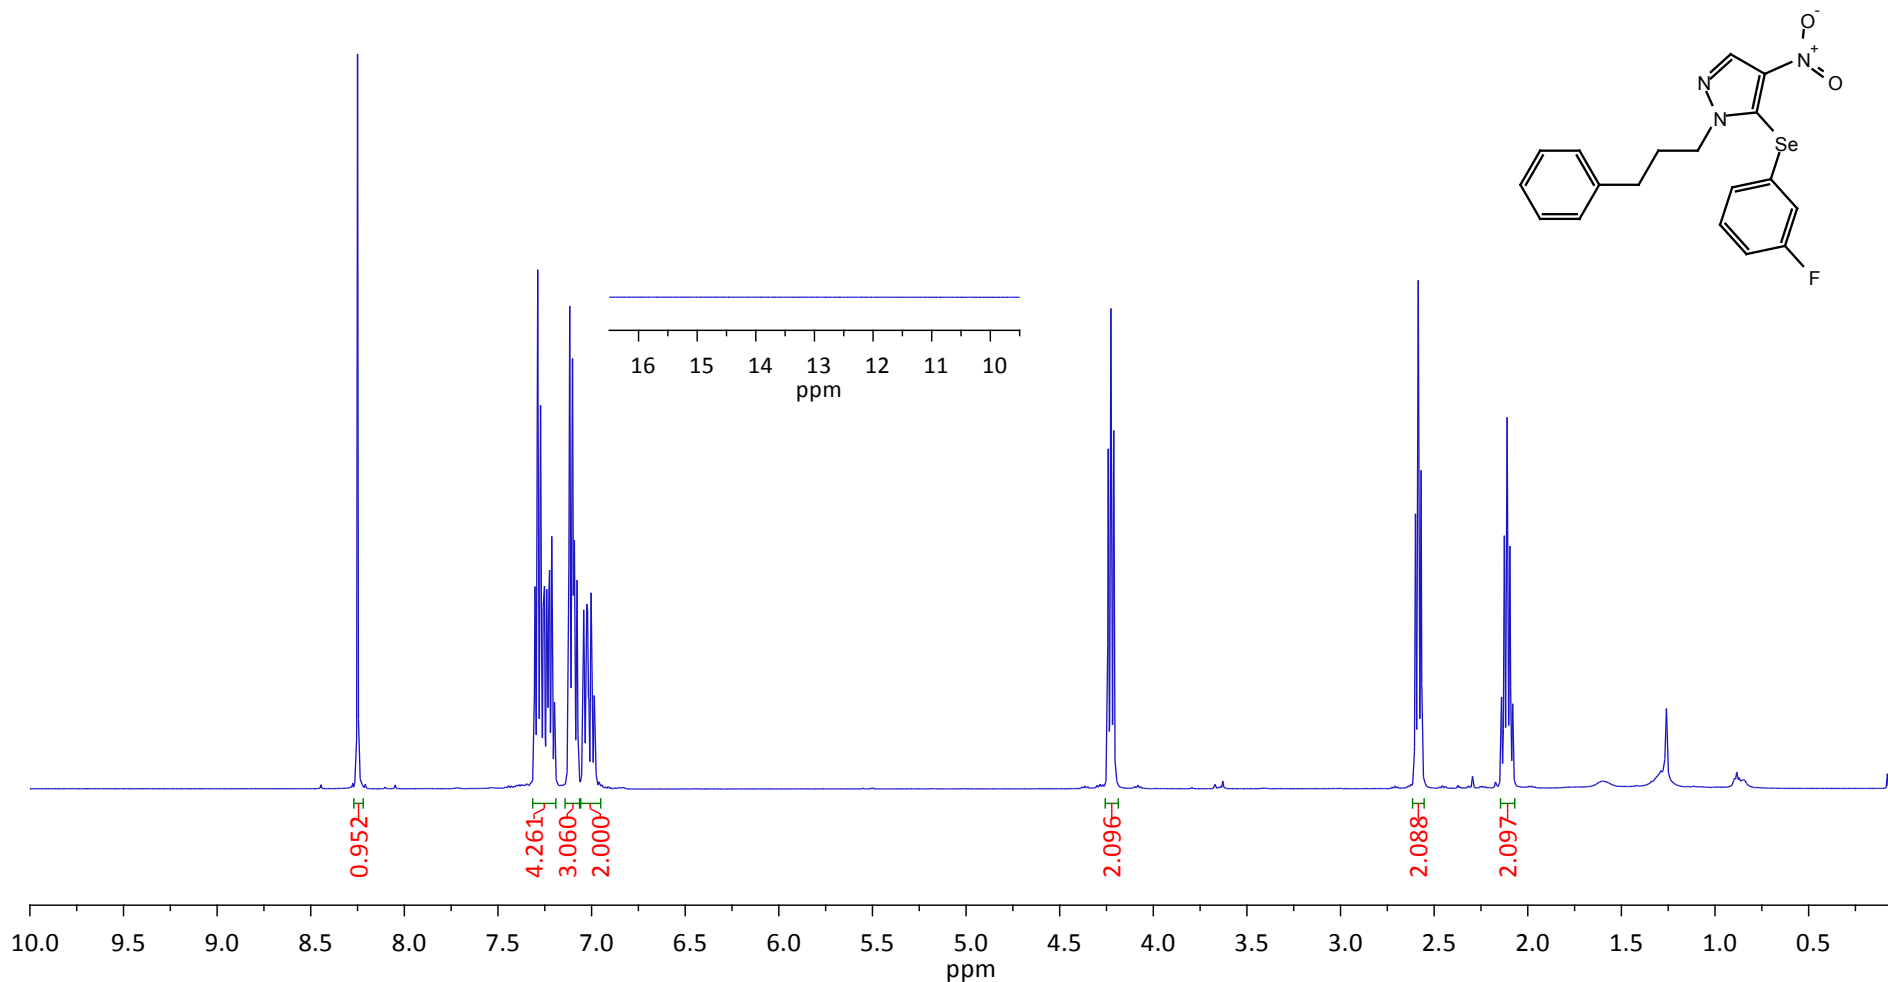

Comment s. mkrtychyan =mj-112-1017=1H.stan CDCl3  
 Number of Scans 24  
 Spectrometer Frequency 500.13  
 Spectral Width 12335.5  
 Spectral Size 65536

Compound **3b**

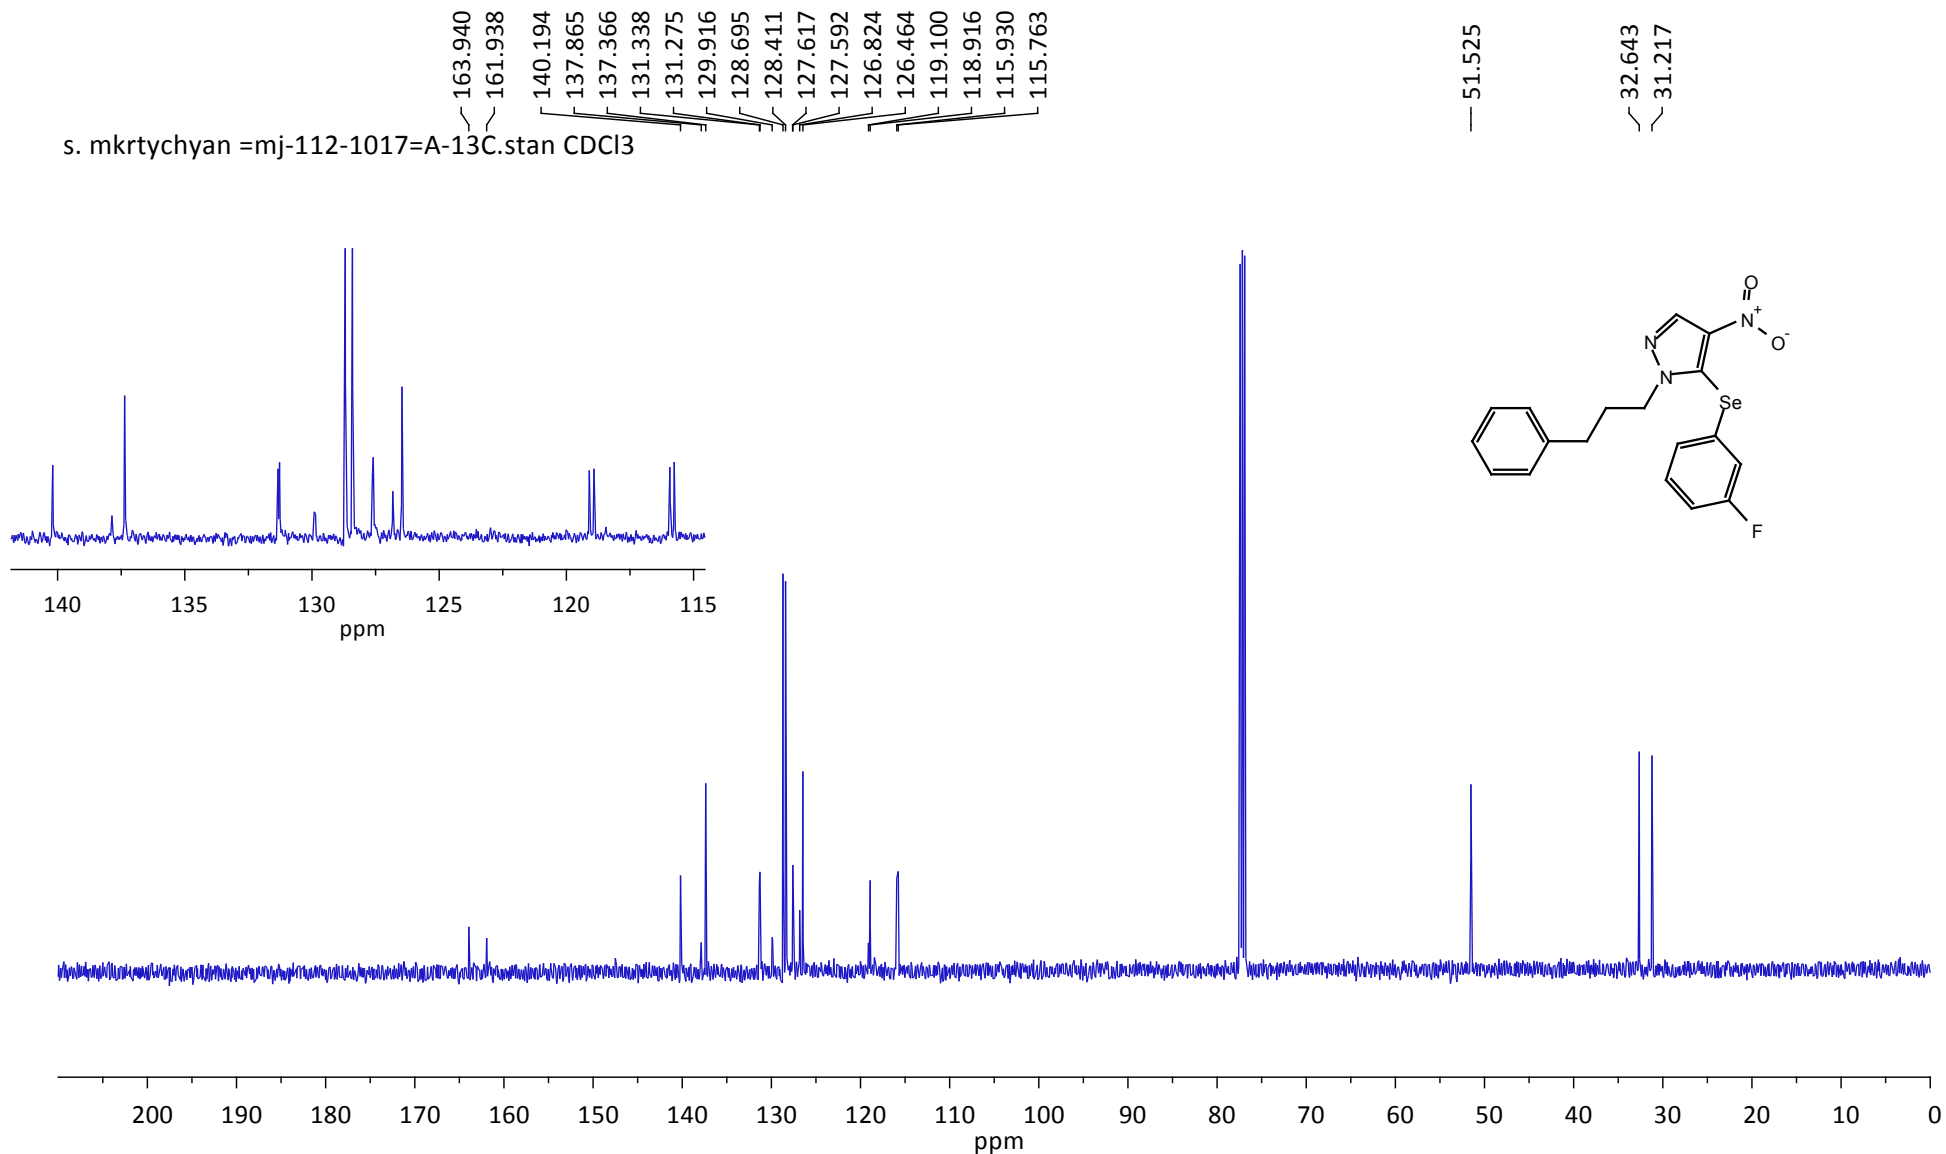

Comment s. mkrtychyan =mj-112-1017=A-13C.stan CDCl3  
 Number of Scans 256  
 Spectrometer Frequency 125.76  
 Spectral Width 36057.7  
 Spectral Size 65536

Compound **3c**

s. mkrtychyan =mj-113=1H.stan CDCl3

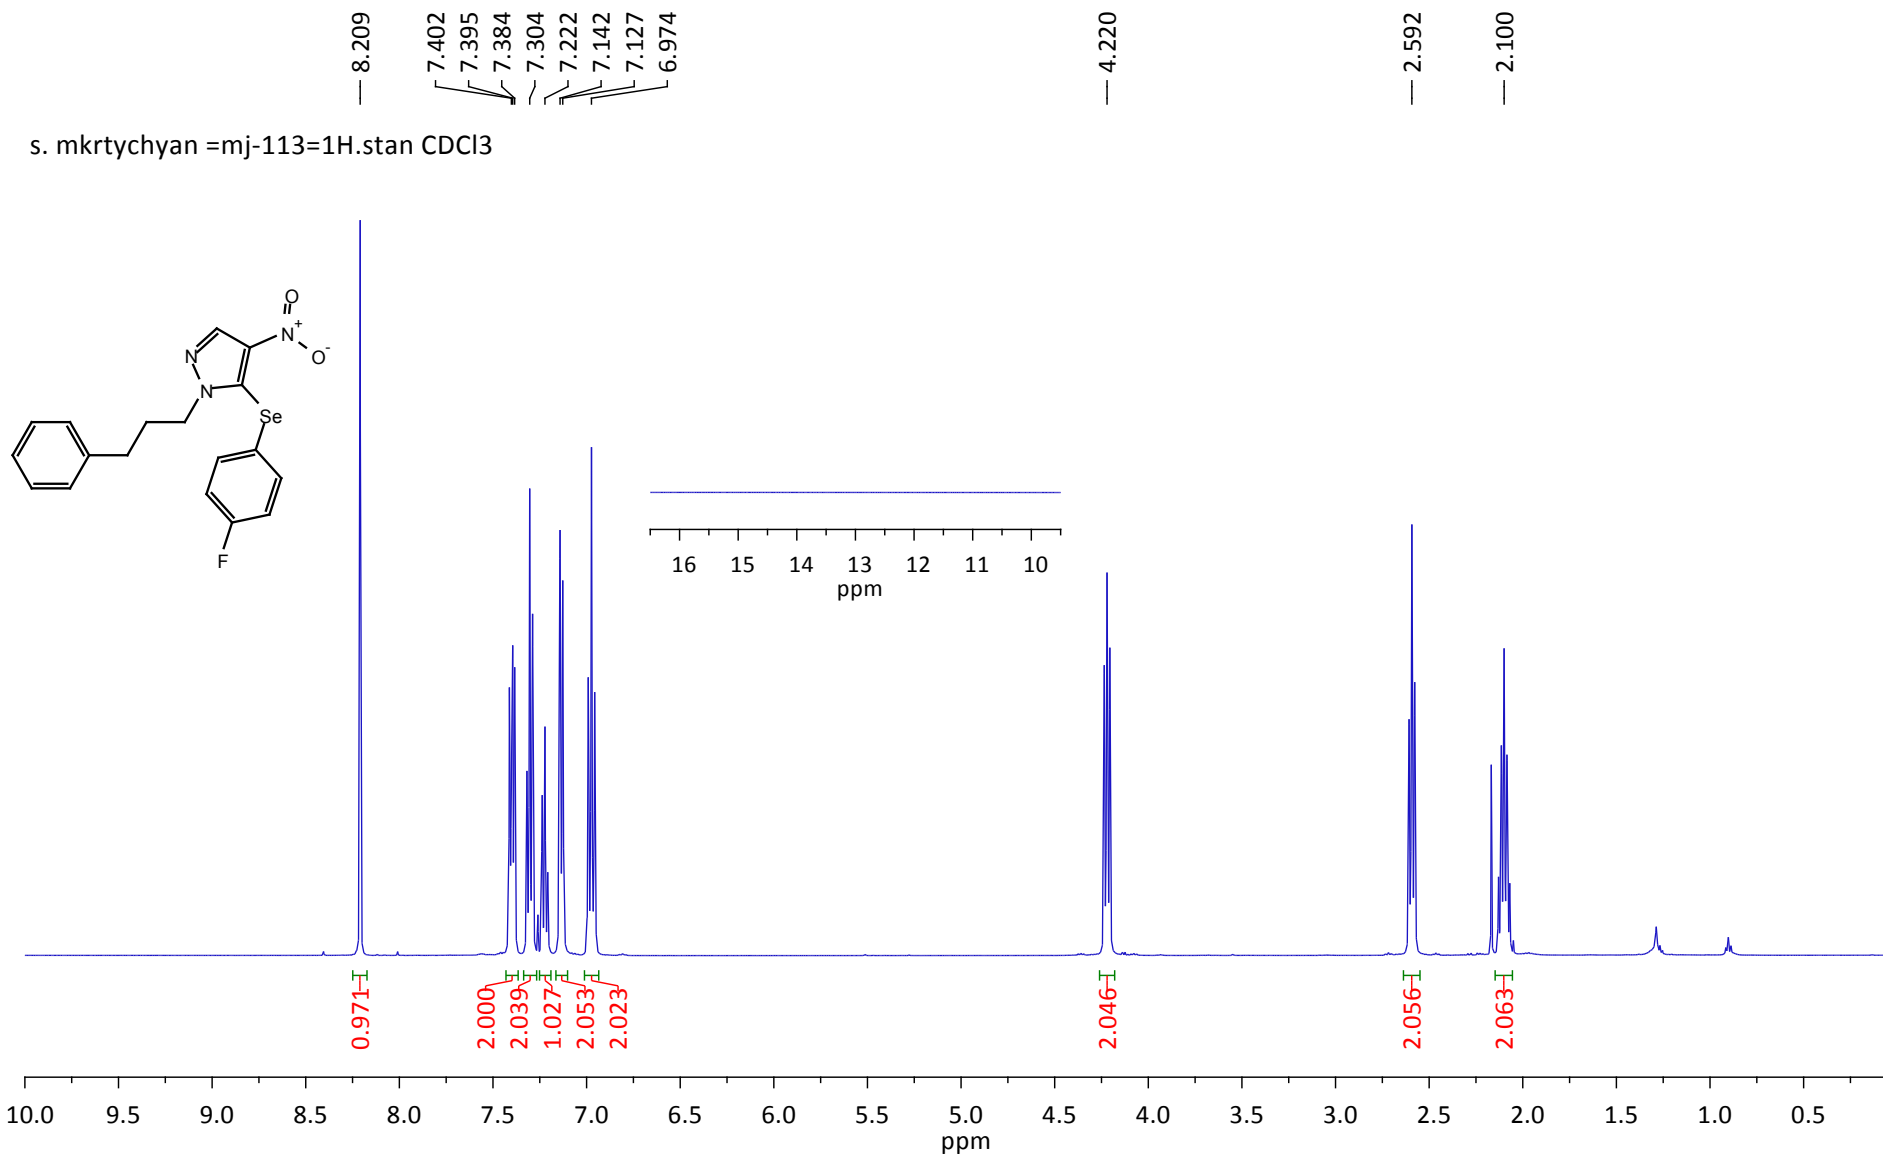

Comment s. mkrtychyan =mj-113=1H.stan CDCl3  
 Number of Scans 24  
 Spectrometer Frequency 500.13  
 Spectral Width 12335.5  
 Spectral Size 65536

Compound **3c**

164.012  
162.024  
140.176  
137.329  
137.075  
135.273  
135.208  
128.541  
128.312  
127.831  
126.290  
122.519  
122.493  
117.223  
117.048

51.271  
32.501  
31.041

s. mkrtychyan =mj-113=A-13C.stan CDCl3

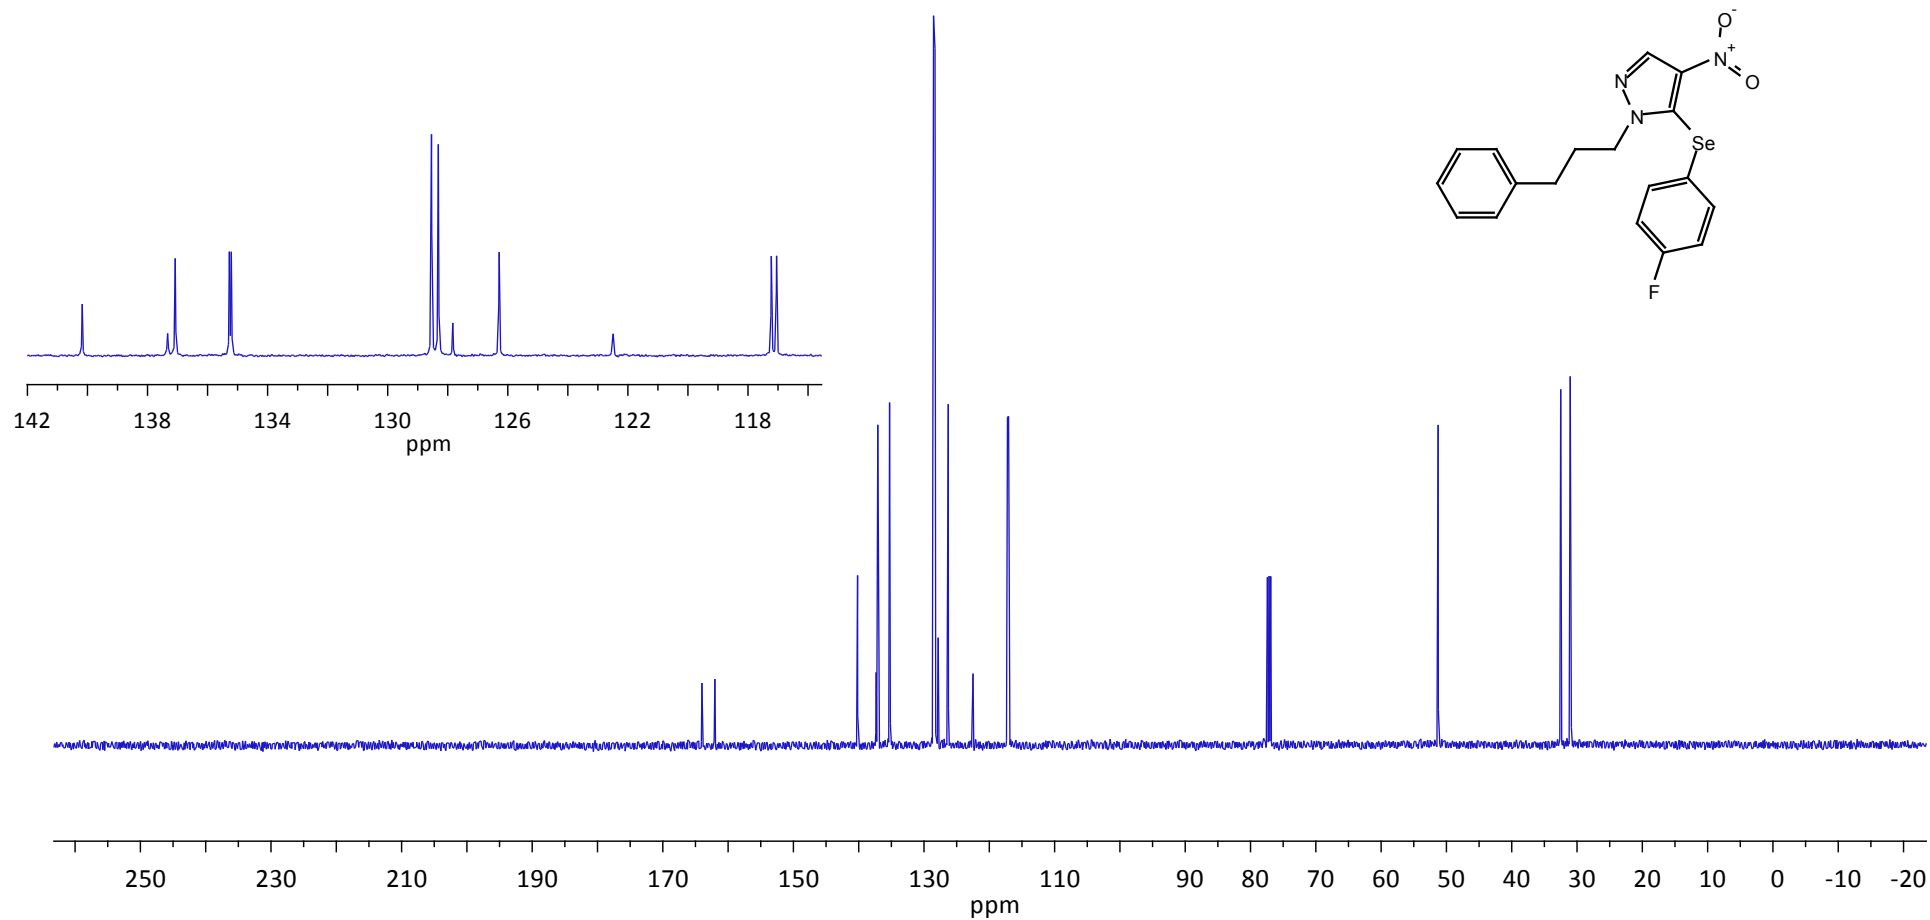

Comment s. mkrtychyan =mj-113=A-13C.stan CDCl3  
 Number of Scans 128  
 Spectrometer Frequency 125.76  
 Spectral Width 36057.7  
 Spectral Size 65536

Compound **4a**

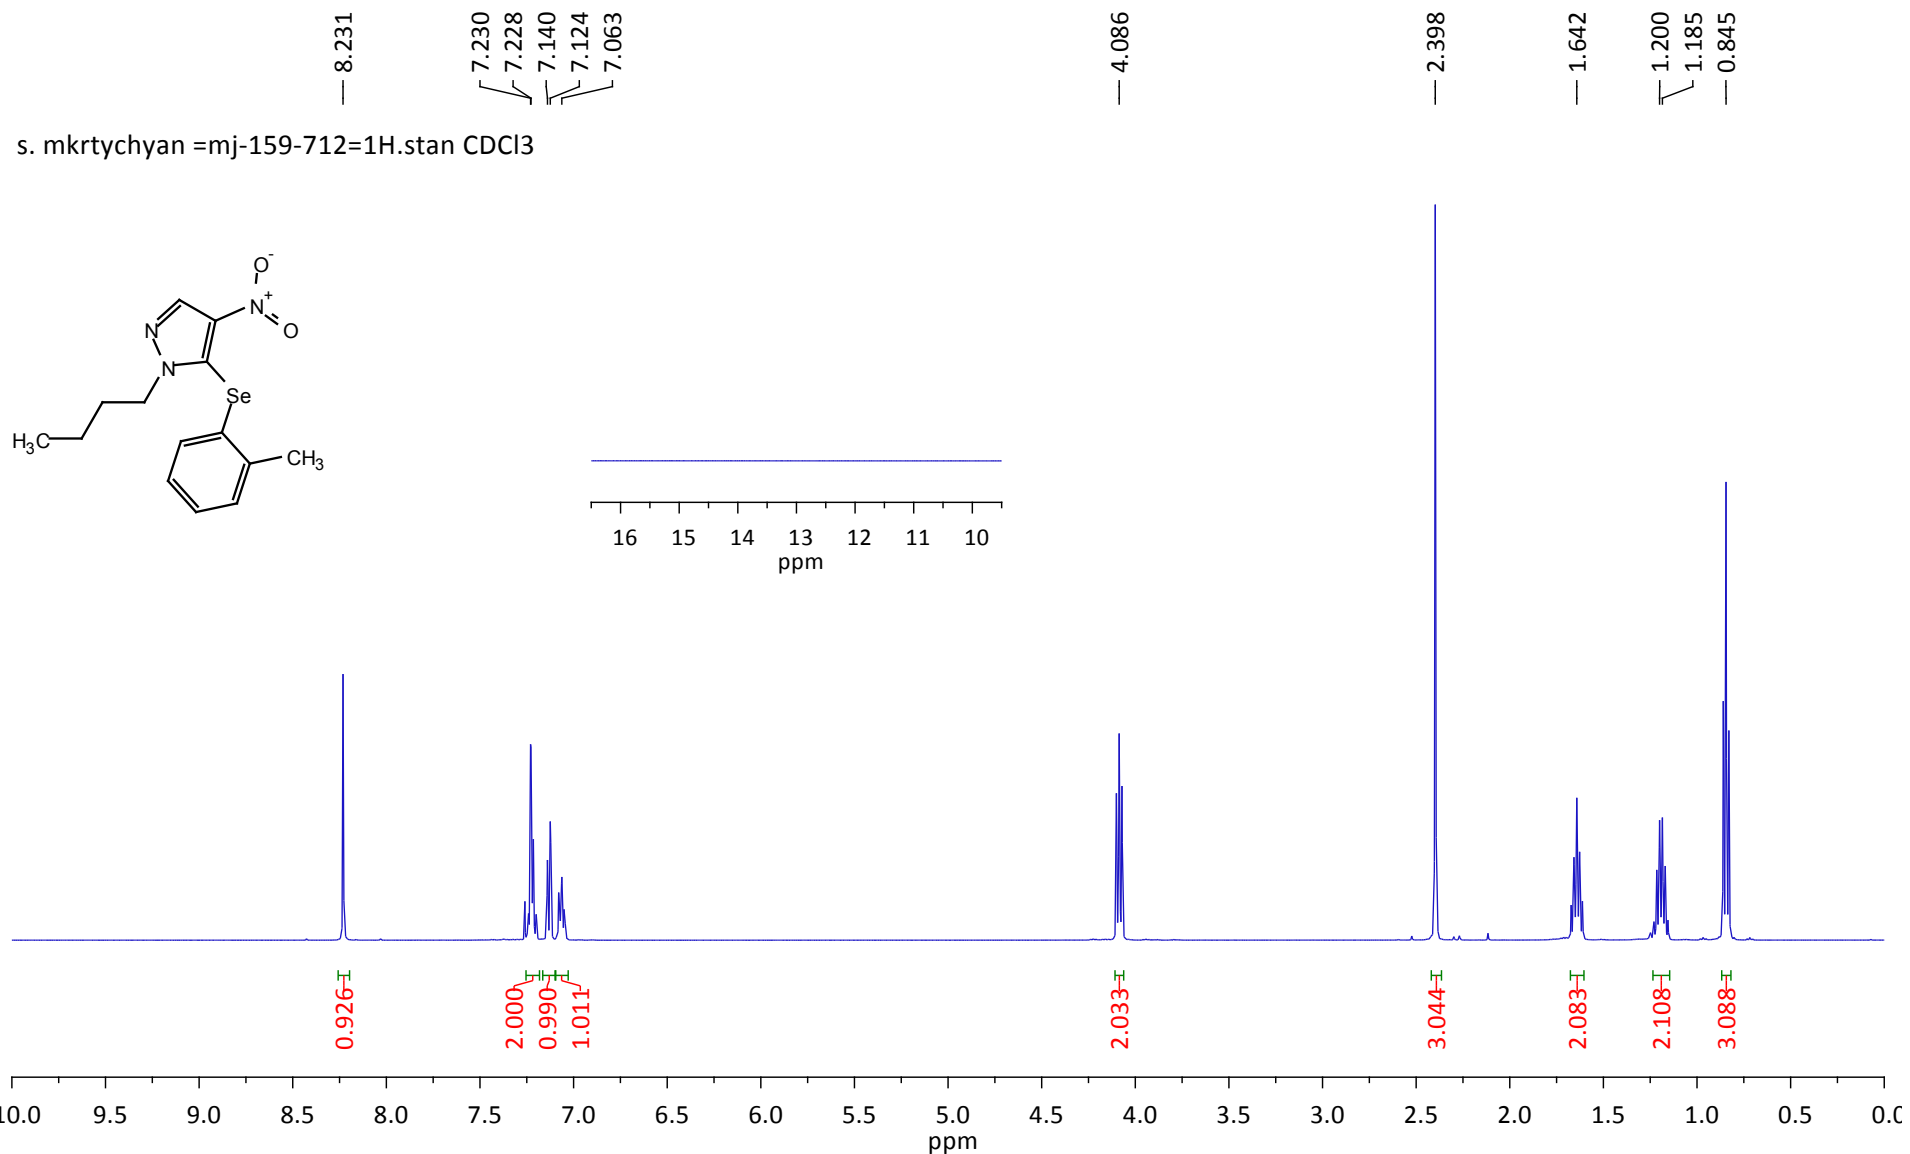

Comment s. mkrtychyan =mj-159-712=1H.stan CDCl<sub>3</sub>

Number of Scans 24

Spectrometer Frequency 500.13

Spectral Width 12335.5

Spectral Size 65536

Compound 4a

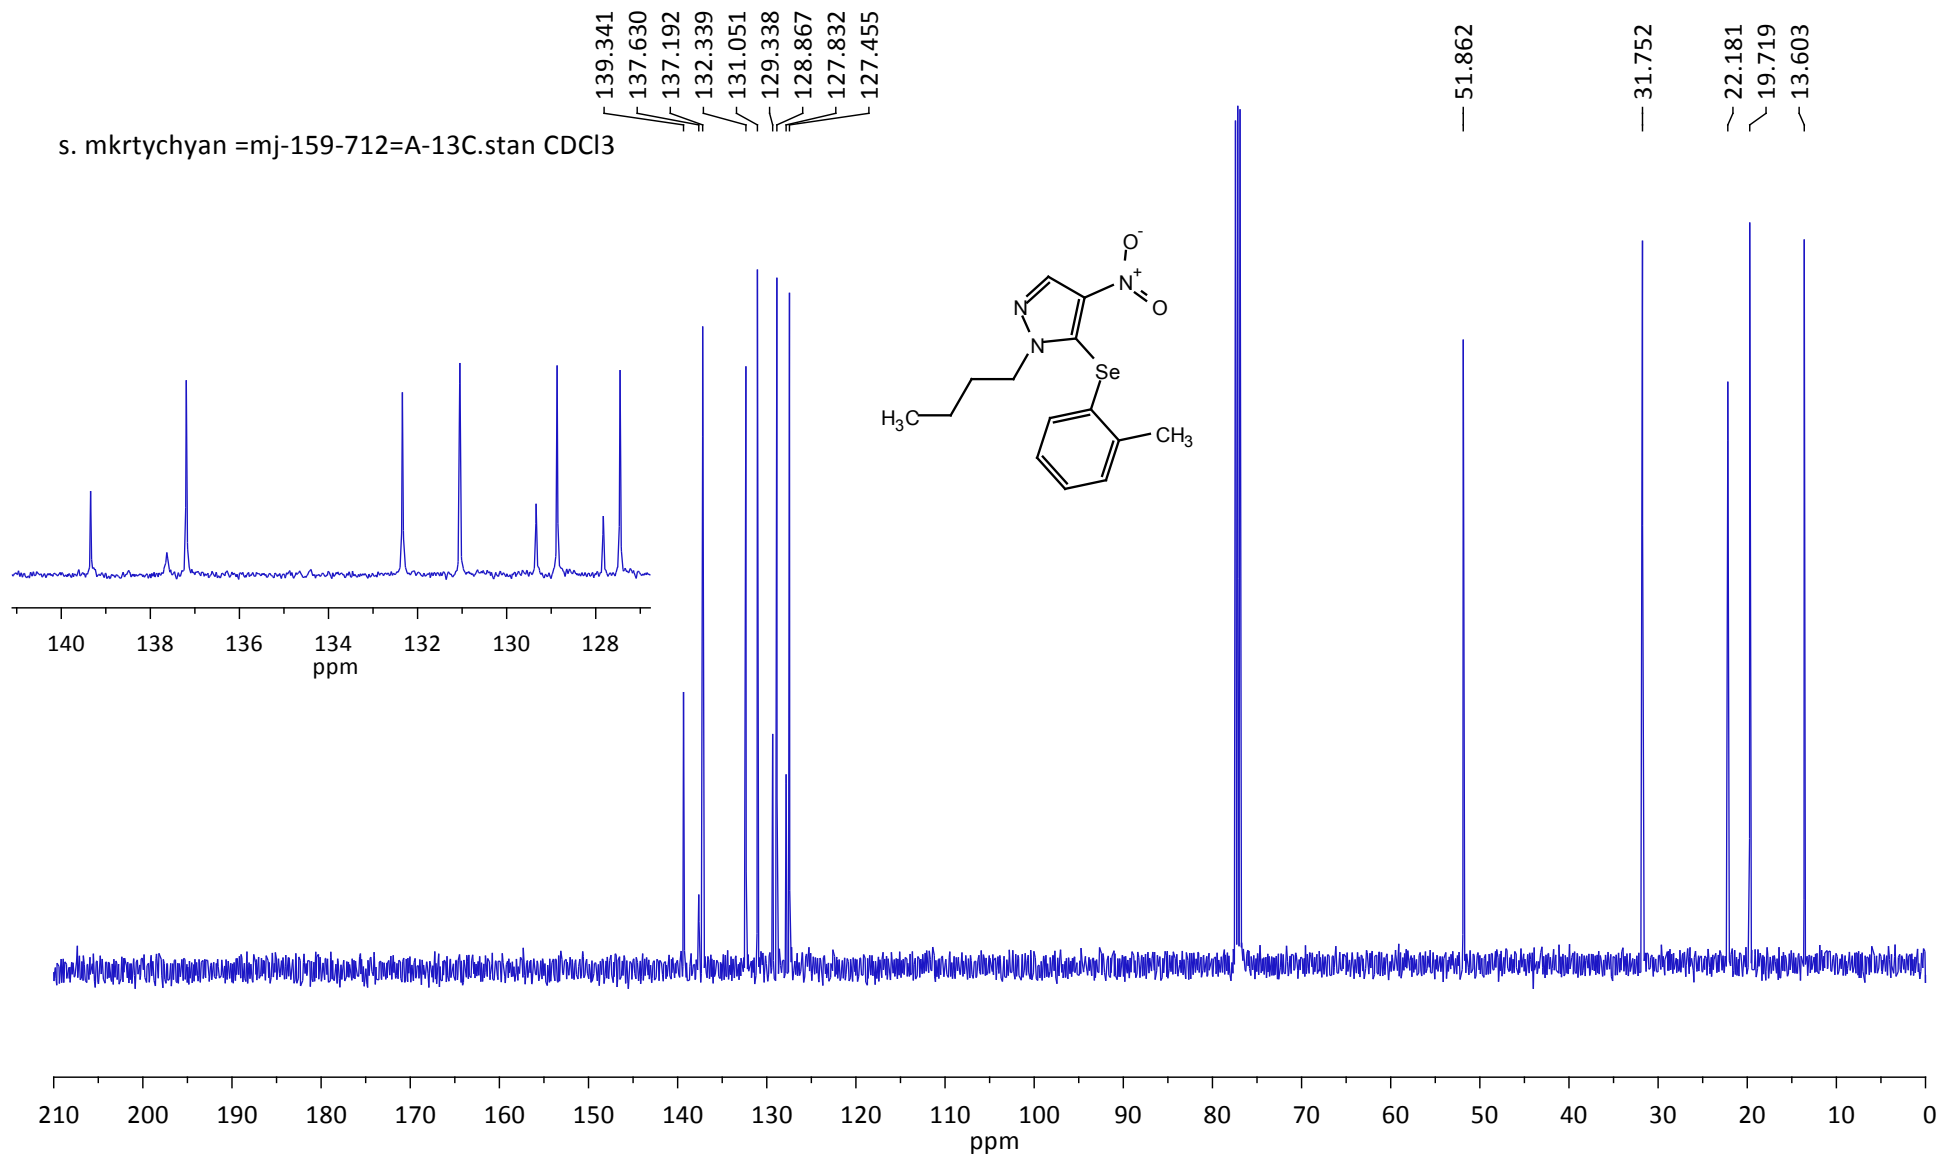

Comment s. mkrtychyan =mj-159-712=A-13C.stan CDCl3  
Number of Scans 296  
Spectrometer Frequency 125.76  
Spectral Width 36057.7  
Spectral Size 65536

Compound **4b**

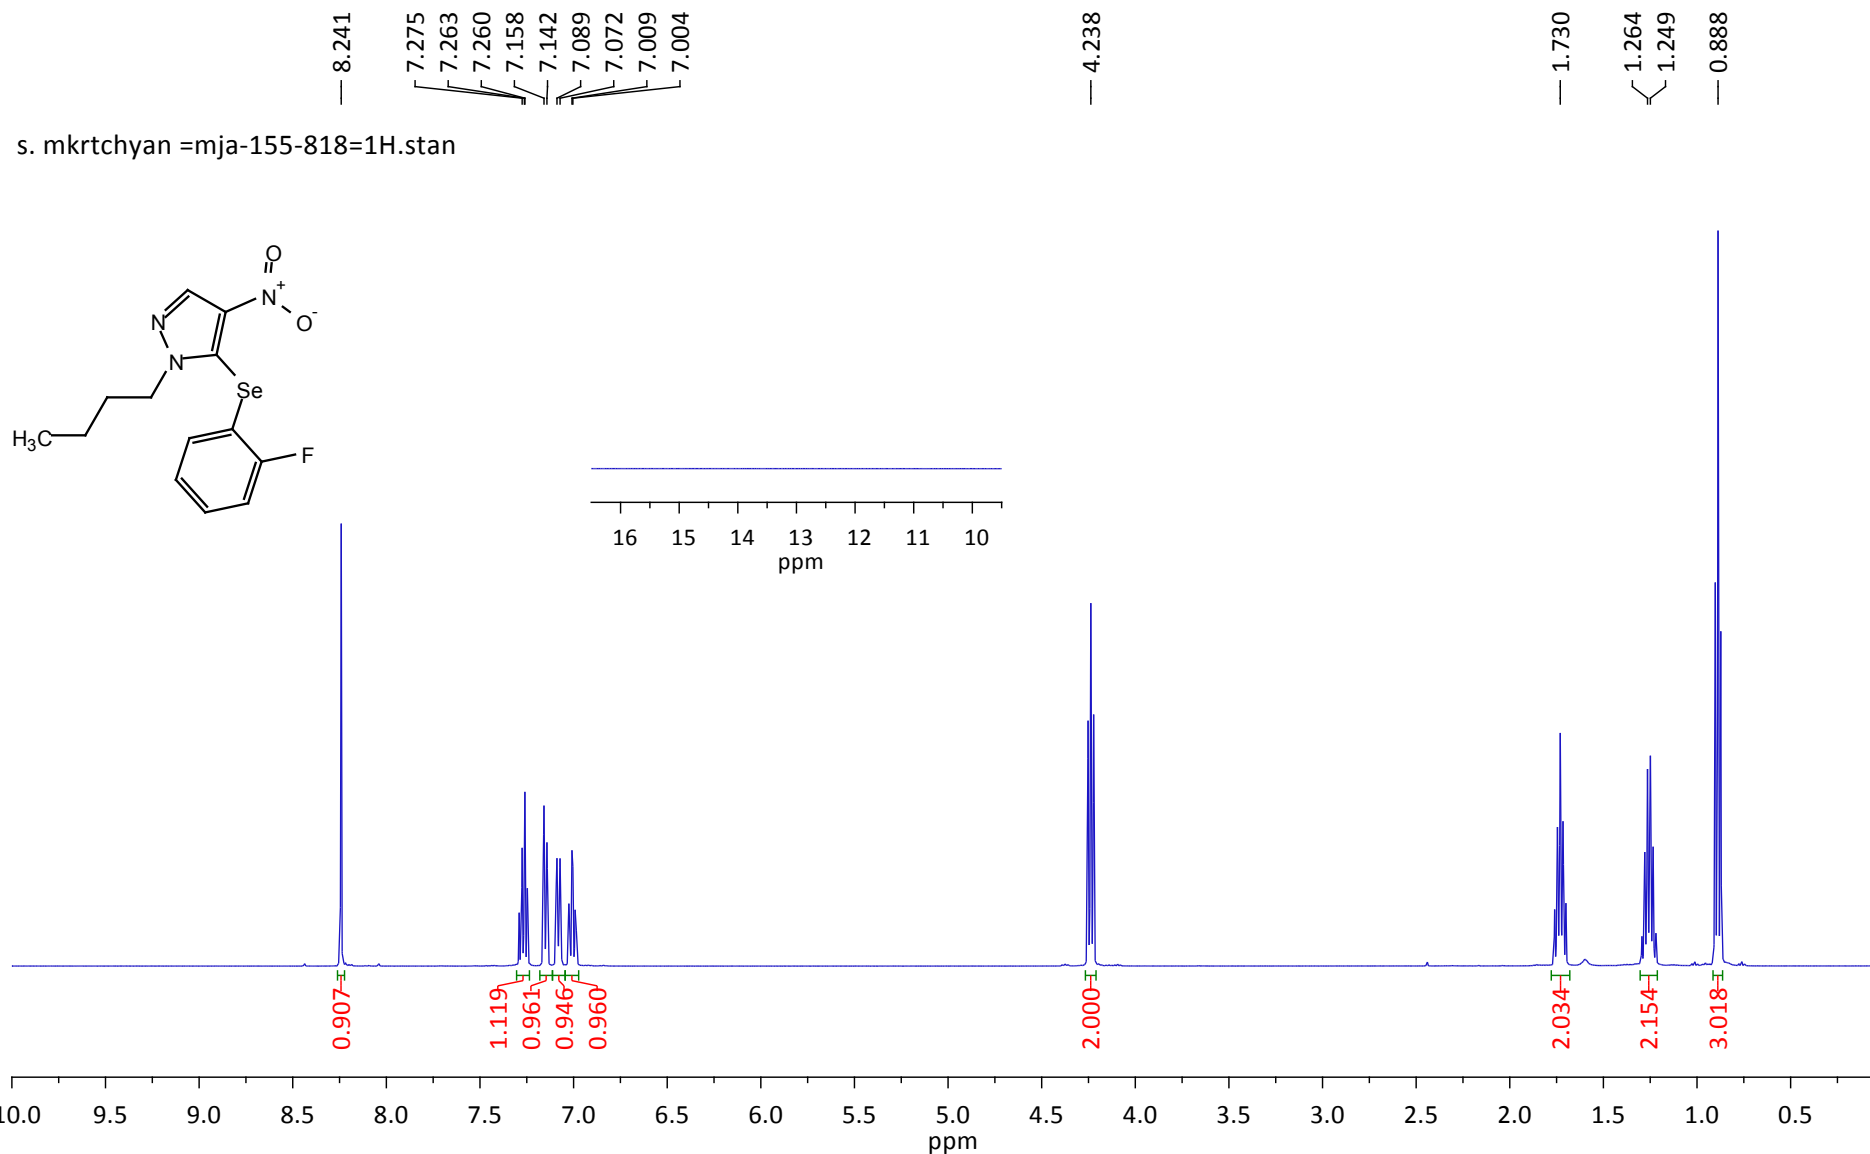

Comment s. mkrtyan =mja-155-818=1H.stan  
 Number of Scans 24  
 Spectrometer Frequency 500.13  
 Spectral Width 12335.5  
 Spectral Size 65536

Compound **4b**

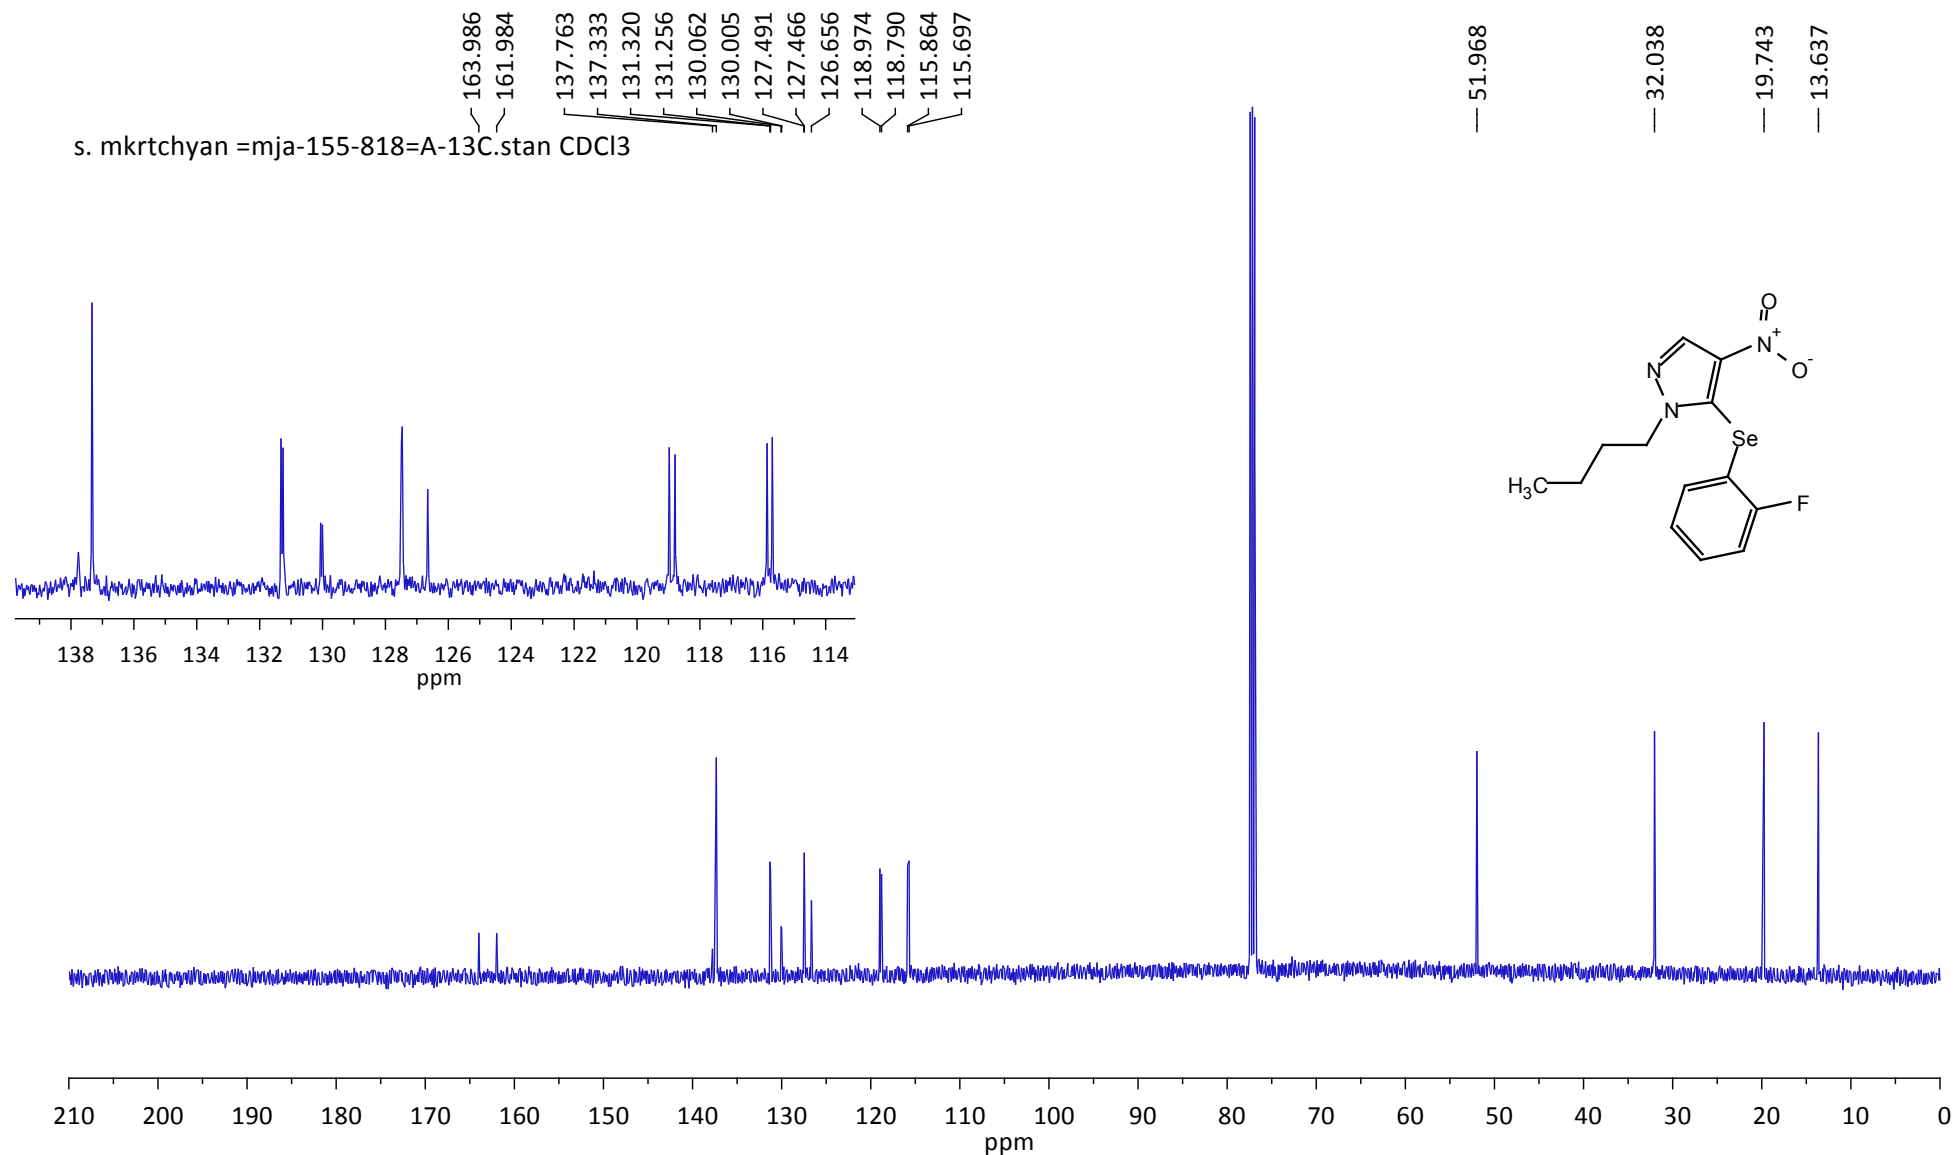

|                        |                                          |
|------------------------|------------------------------------------|
| Comment                | s. mkrtyan =mja-155-818=A-13C.stan CDCl3 |
| Number of Scans        | 512                                      |
| Spectrometer Frequency | 125.76                                   |
| Spectral Width         | 36057.7                                  |
| Spectral Size          | 65536                                    |



Compound **4c**

s. mkrтчhyan =mja-156-814=1H.stan

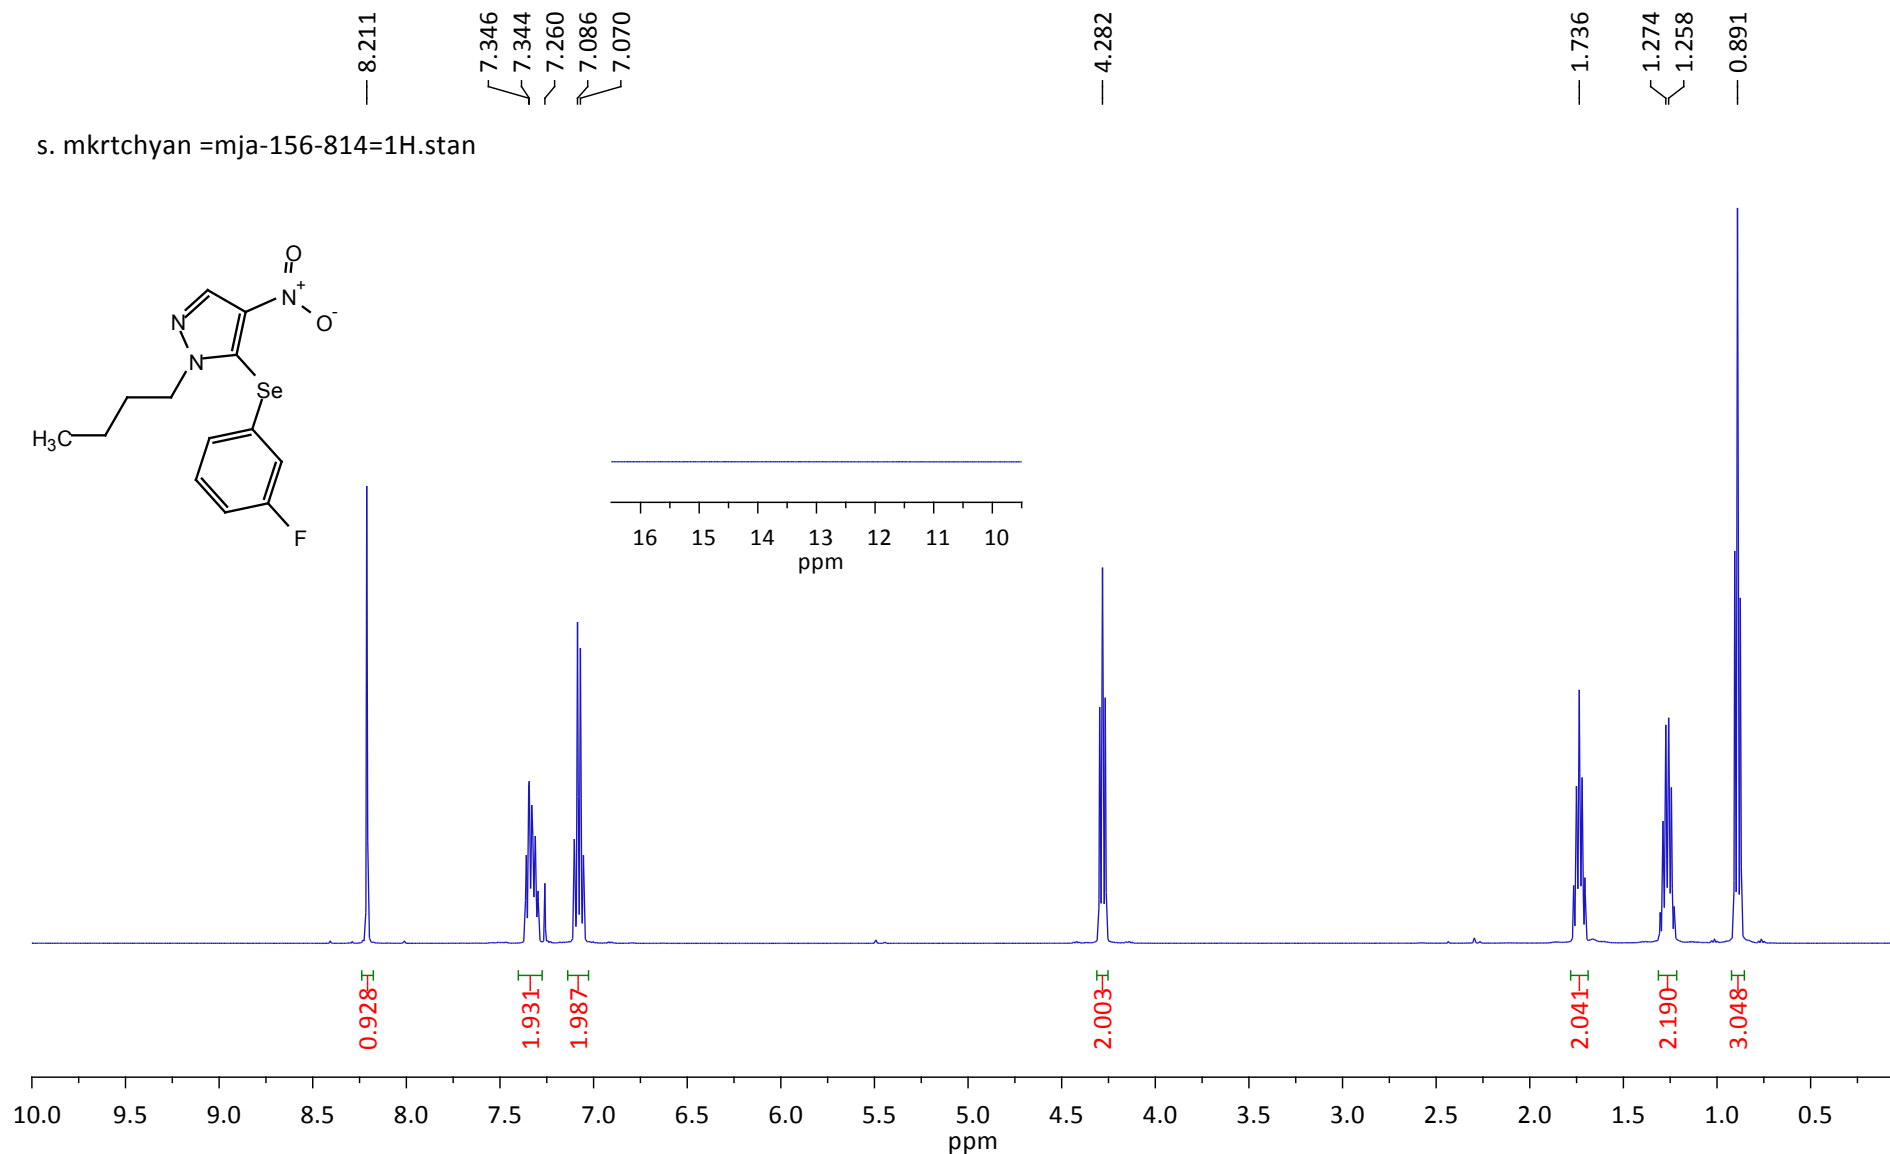

Comment s. mkrтчhyan =mja-156-814=1H.stan  
 Number of Scans 24  
 Spectrometer Frequency 500.13  
 Spectral Width 12335.5  
 Spectral Size 65536

Compound **4c**

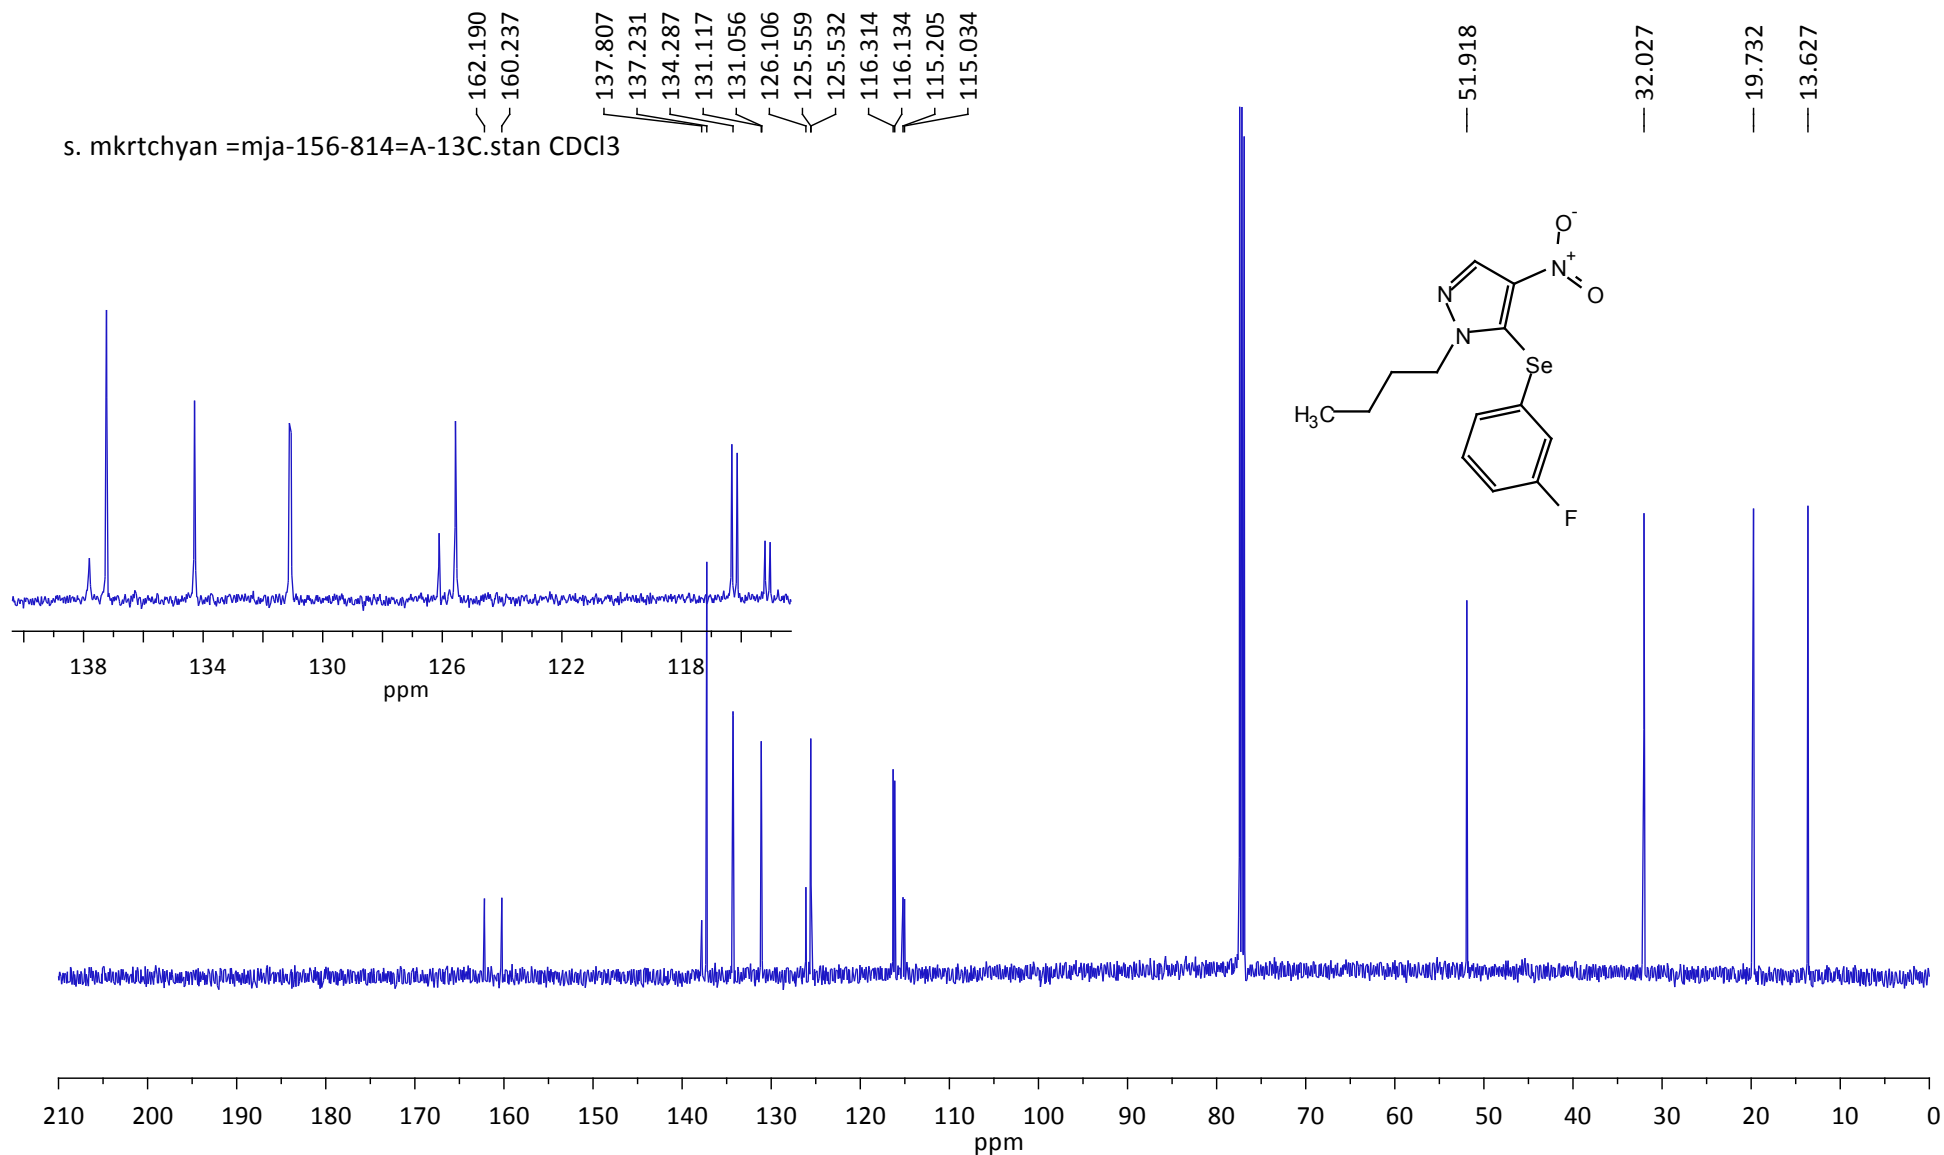

Comment s. mkrtyan =mja-156-814=A-13C.stan CDCl3

Number of Scans 512

Spectrometer Frequency 125.76

Spectral Width 36057.7

Spectral Size 65536

Compound **4d**

s. mkrtyan =mj-118-818=1H.stan CDCl3

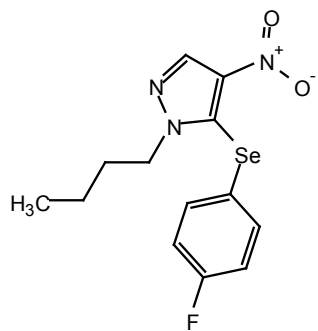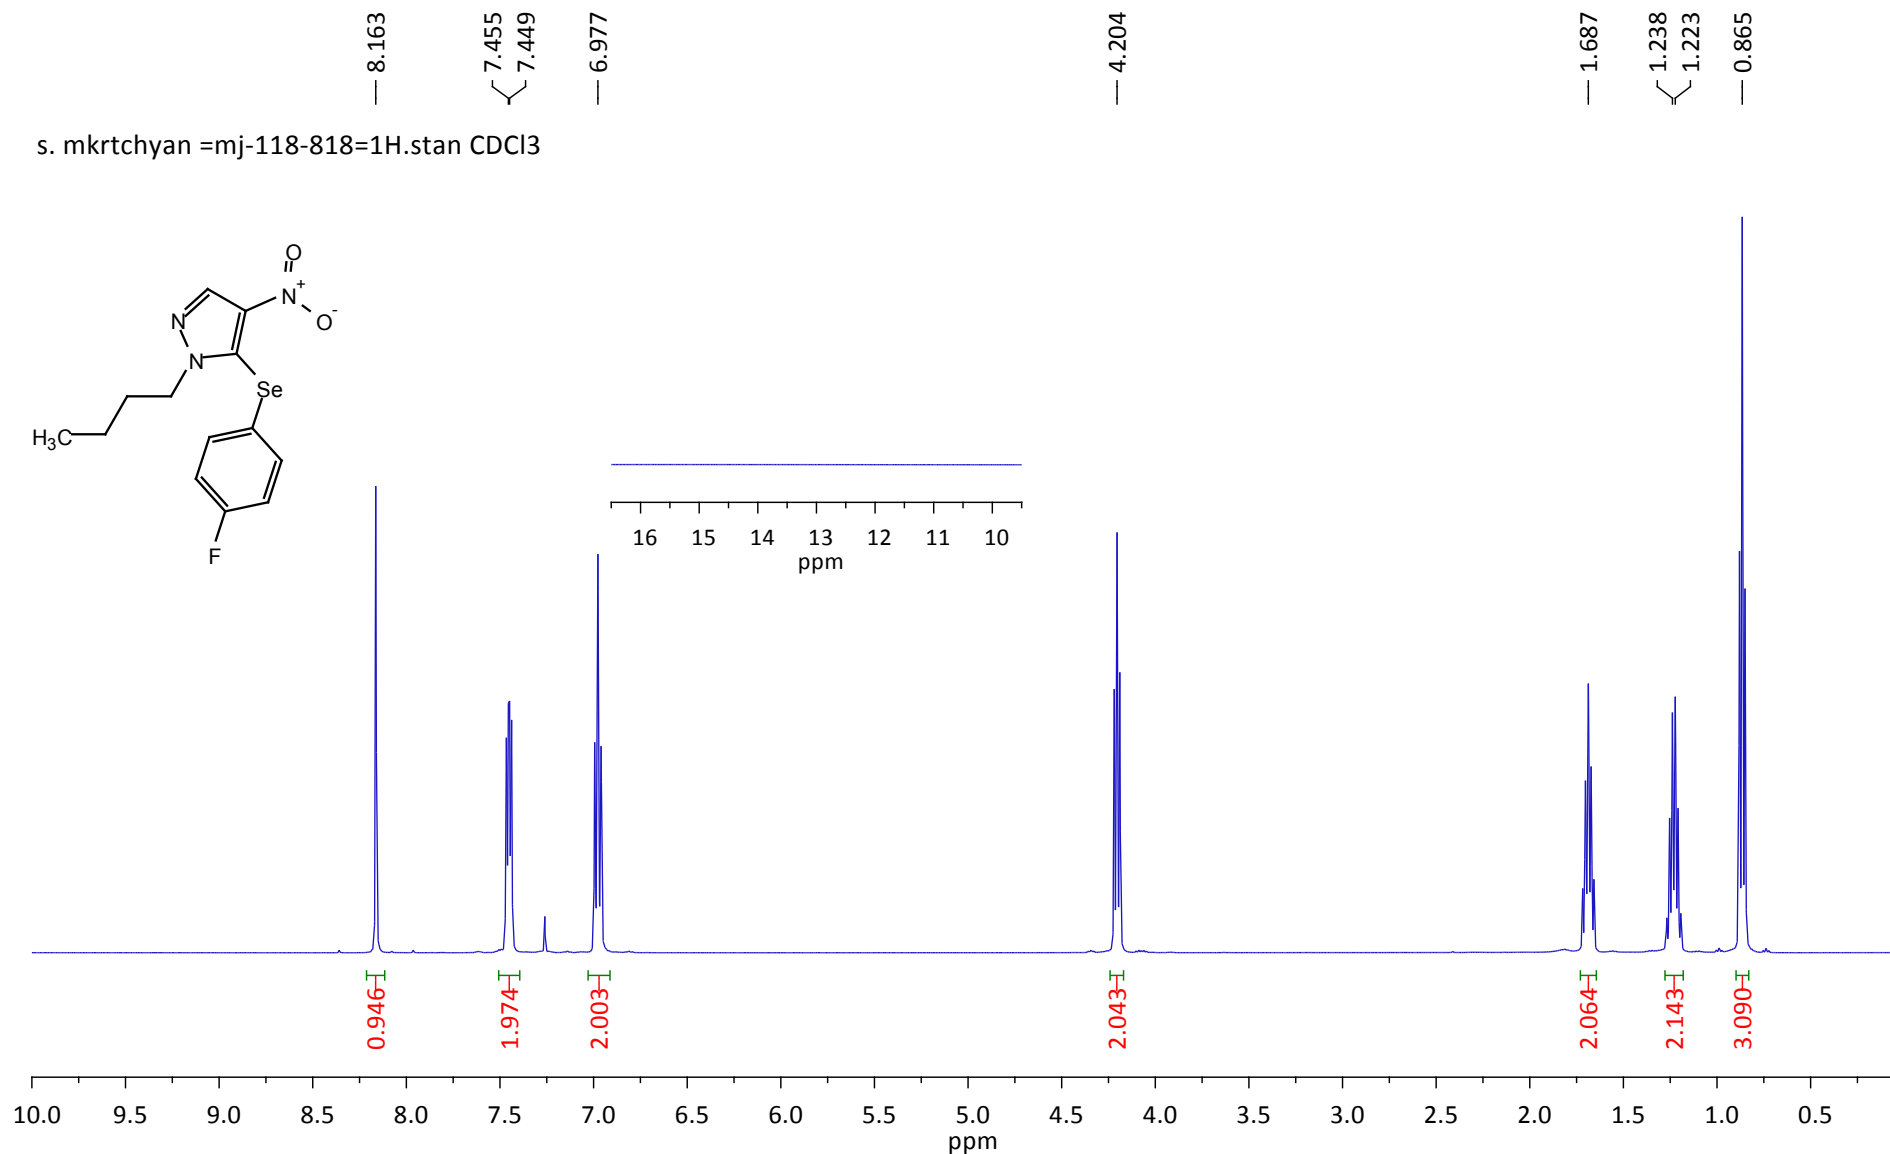

Comment s. mkrtyan =mj-118-818=1H.stan CDCl3  
 Number of Scans 24  
 Spectrometer Frequency 500.13  
 Spectral Width 12335.5  
 Spectral Size 65536

Compound **4d**

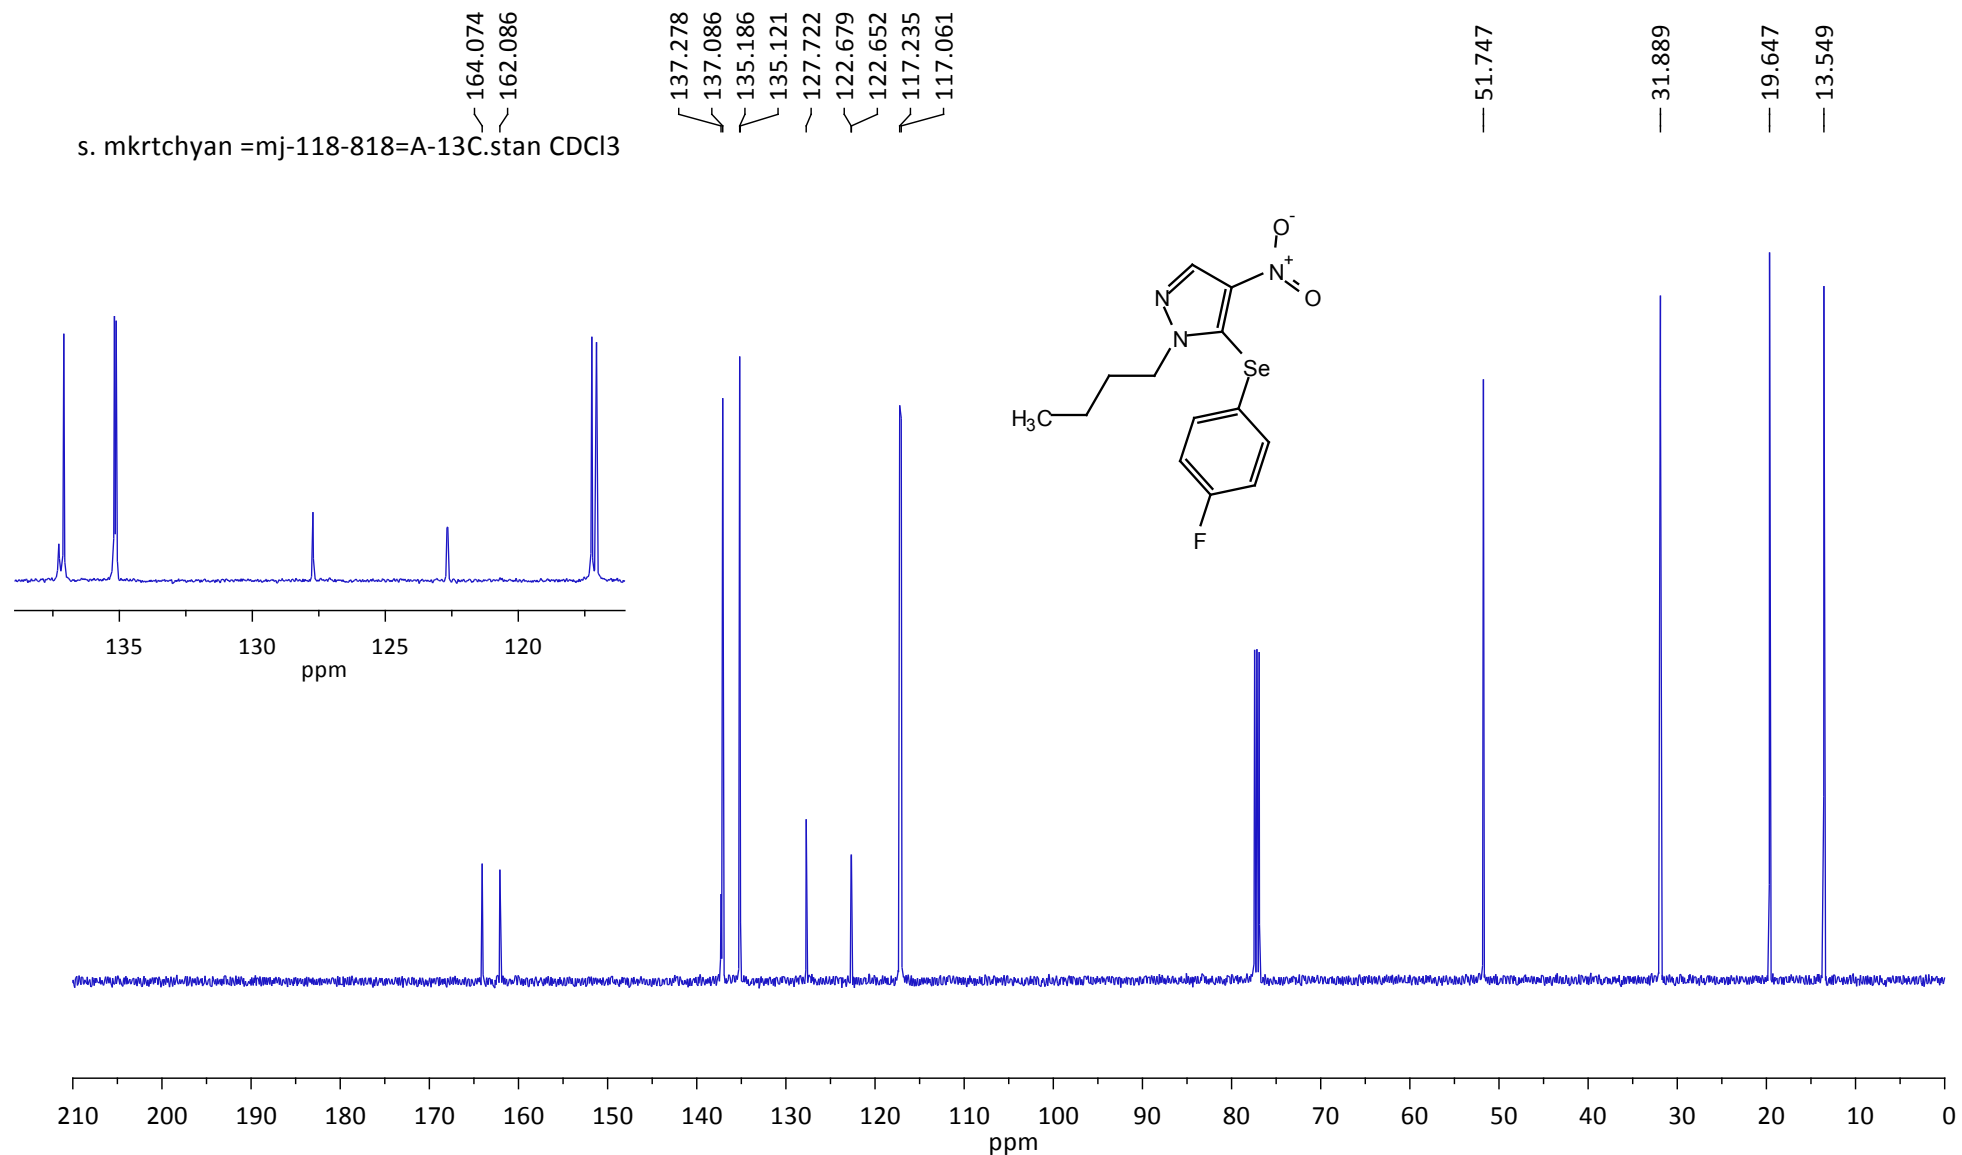

Comment s. mkrtyan =mj-118-818=A-13C.stan CDCl3  
 Number of Scans 256  
 Spectrometer Frequency 125.76  
 Spectral Width 36057.7  
 Spectral Size 65536

Compound 5a

7.612  
7.598  
7.596  
7.493  
7.353  
7.260  
7.108  
7.066  
7.017  
6.978

— 4.227

— 2.290

s. mkrtyan =mj-21-ki-f7786=1H.stan CDCl3

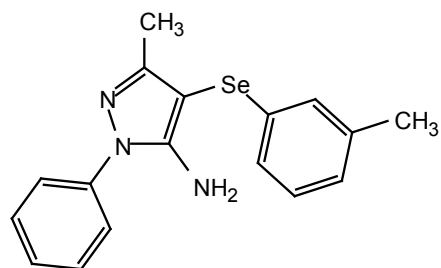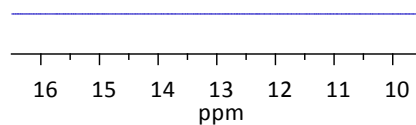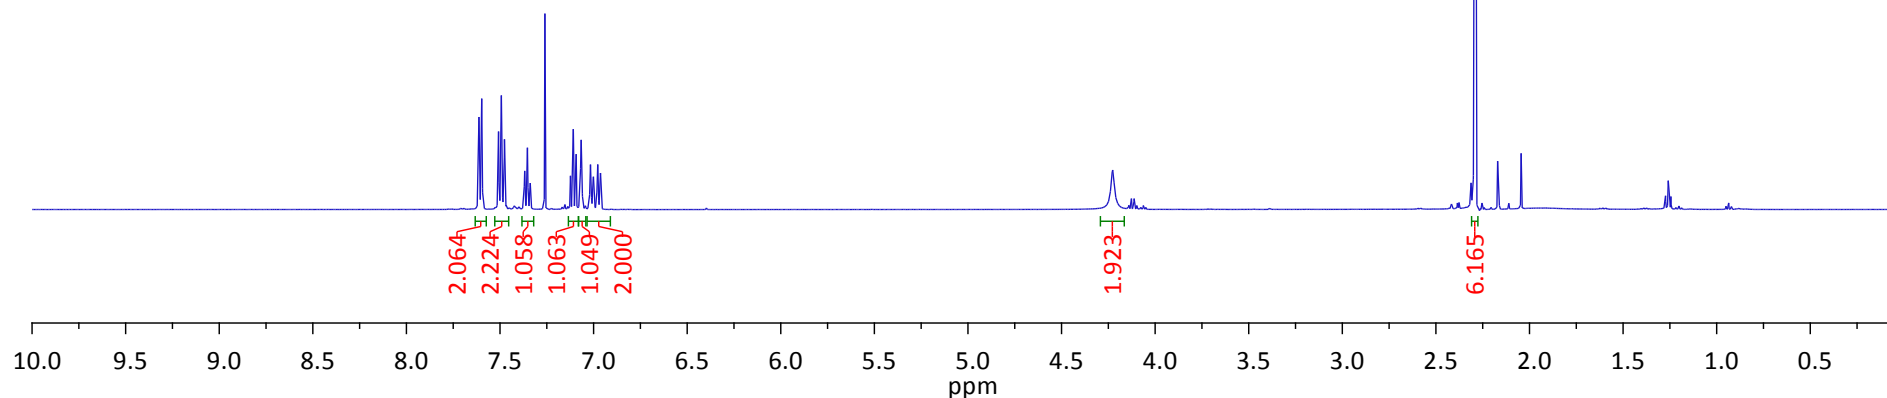

Comment s. mkrtyan =mj-21-ki-f7786=1H.stan CDCl3  
Number of Scans 24  
Spectrometer Frequency 500.13  
Spectral Width 12335.5  
Spectral Size 65536

Compound 5a

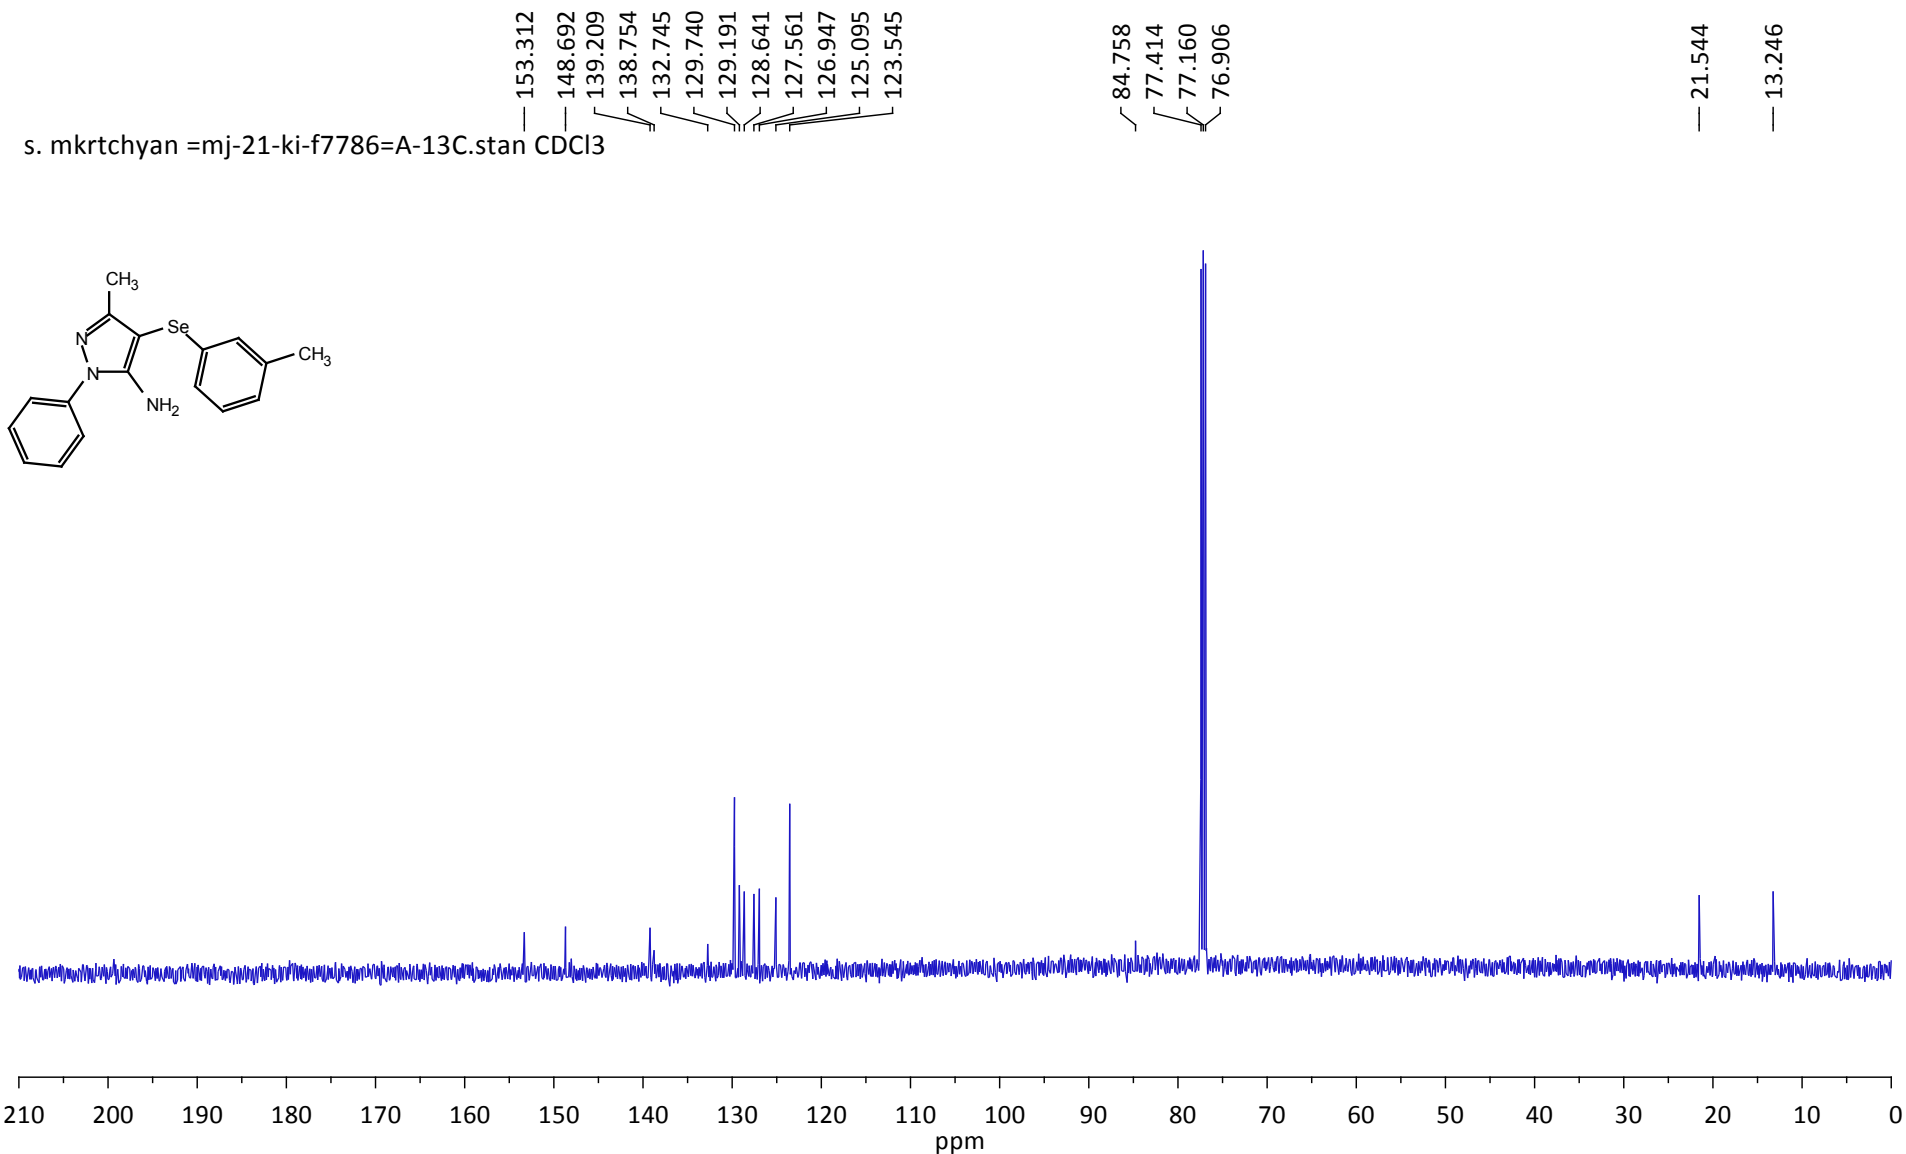

Comment s. mkrtyan =mj-21-ki-f7786=A-13C.stan CDCl3  
 Number of Scans 512  
 Spectrometer Frequency 125.76  
 Spectral Width 36057.7  
 Spectral Size 65536

Compound **5b**

7.577  
7.575  
7.469  
7.333  
7.260  
7.151  
7.134  
7.047  
7.031

— 4.225

— 2.287  
— 2.282

s. mkrtyan =mj-1-k1f2028=1H.stan CDCl3

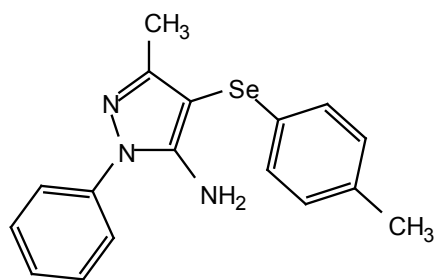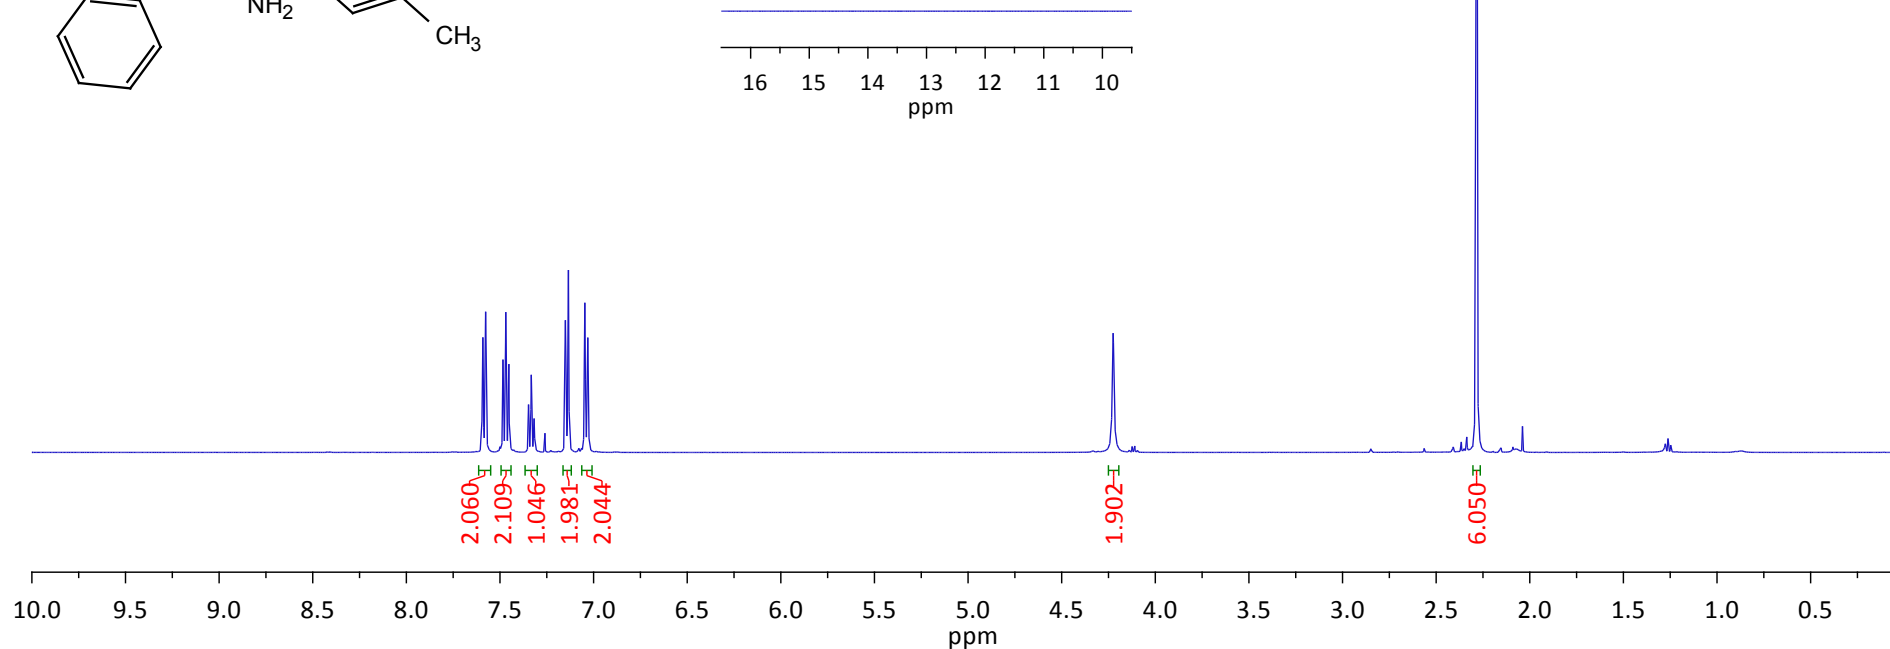

Comment s. mkrtyan =mj-1-k1f2028=1H.stan CDCl3  
Number of Scans 32  
Spectrometer Frequency 500.13  
Spectral Width 12335.5  
Spectral Size 65536

Compound **5b**

s. mkrtyan =mj-1-k1f2028=A-13C.stan CDCl<sub>3</sub>

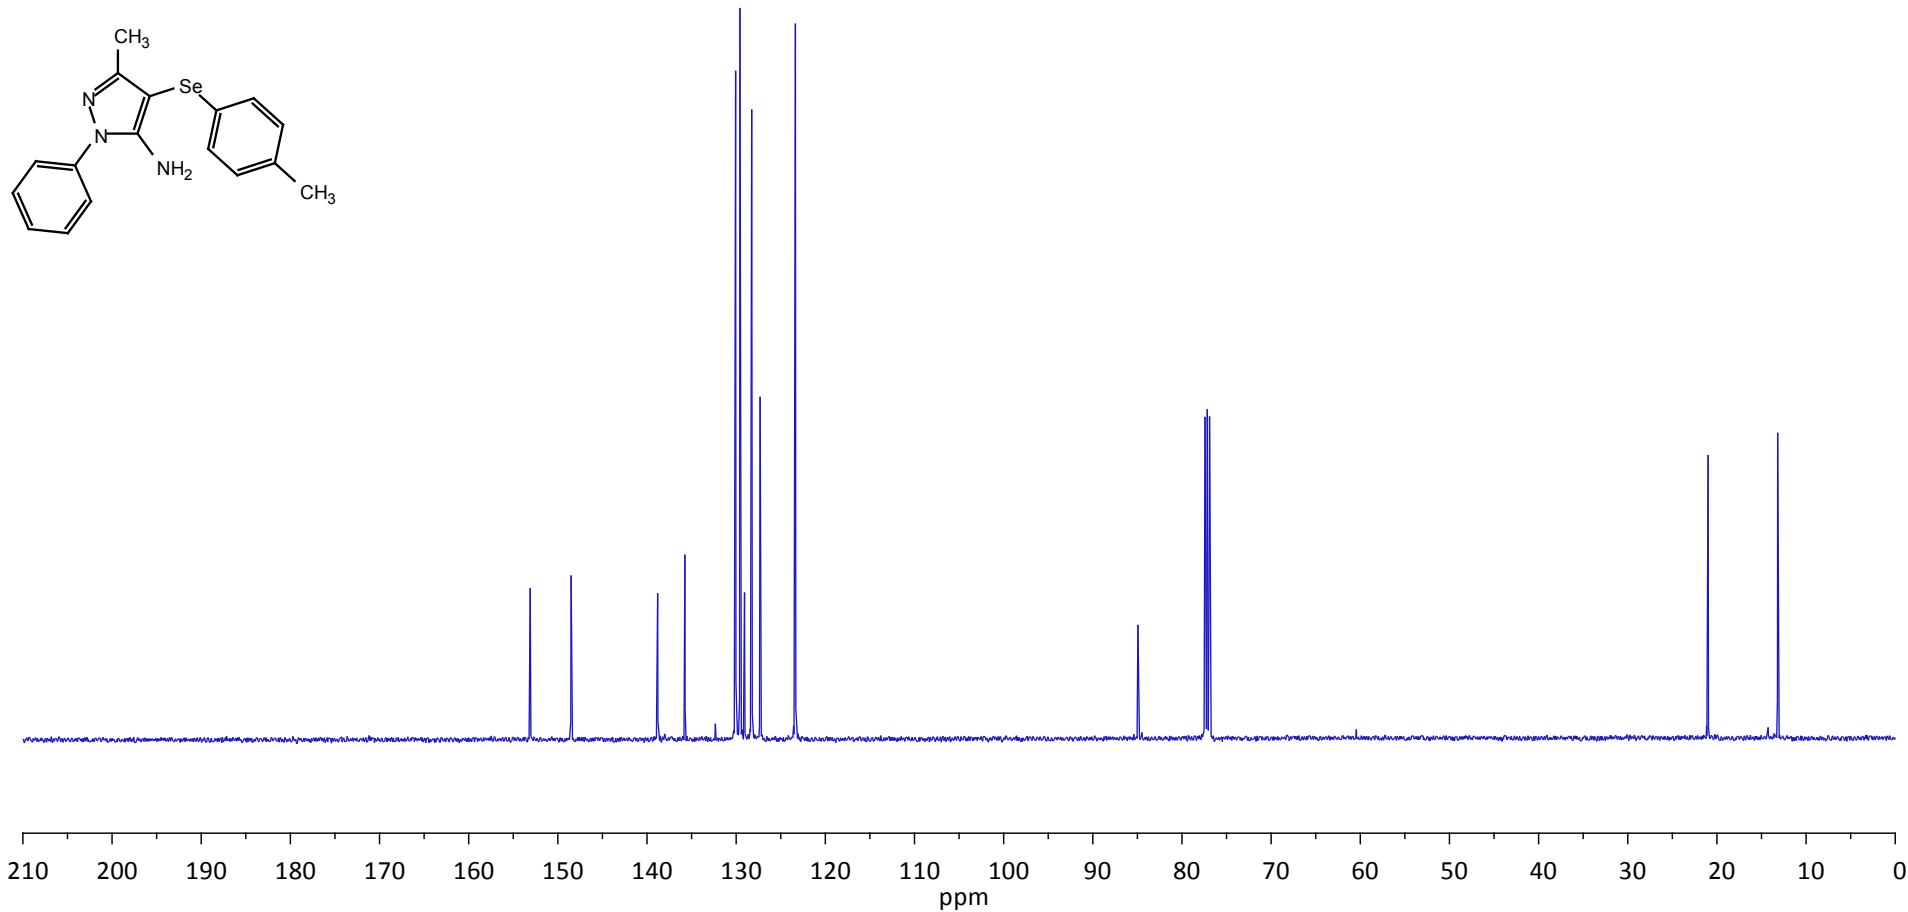

|                        |                                                       |
|------------------------|-------------------------------------------------------|
| Comment                | s. mkrtyan =mj-1-k1f2028=A-13C.stan CDCl <sub>3</sub> |
| Number of Scans        | 1024                                                  |
| Spectrometer Frequency | 125.76                                                |
| Spectral Width         | 36057.7                                               |
| Spectral Size          | 65536                                                 |



Compound 5c

7.575  
7.574  
7.472  
7.335  
7.260  
7.169  
7.153  
7.071  
7.055

— 4.232

2.591  
2.576  
~ 2.282

— 1.202

s. mkrtyan =mj-1-k1f67112=1H.stan CDCl3

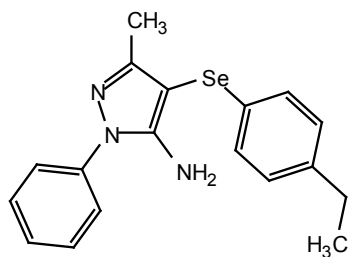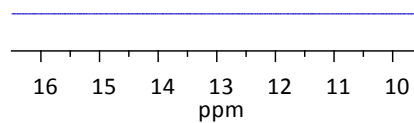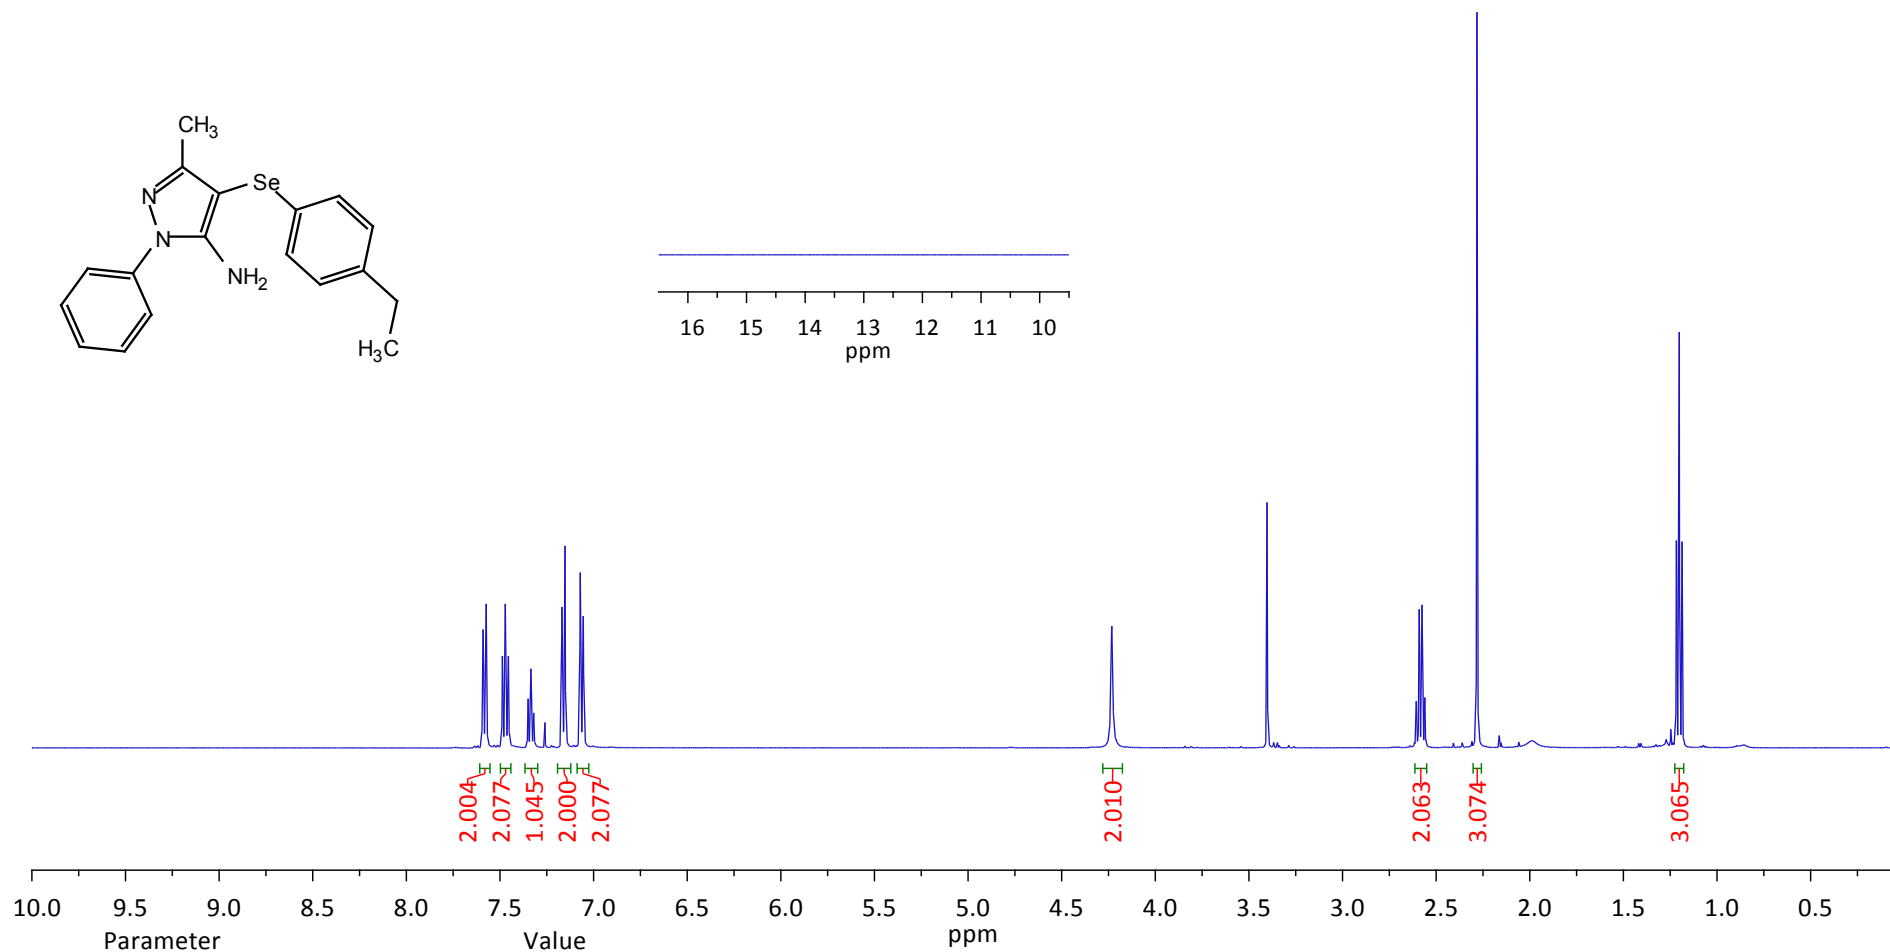

Comment s. mkrtyan =mj-1-k1f67112=1H.stan CDCl3  
 Number of Scans 32  
 Spectrometer Frequency 500.13  
 Spectral Width 12335.5  
 Spectral Size 65536

Compound 5c

s. mkrtyan =mj-2-k1f67112=A-13C.stan CDCl3

153.193  
148.581  
142.208  
138.792  
129.612  
129.360  
128.918  
128.271  
127.385  
123.432

84.914  
77.414  
77.160  
76.905

28.410

15.648  
13.190

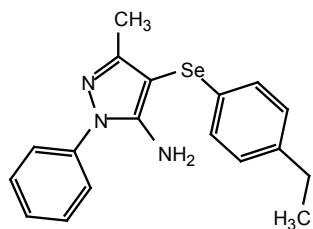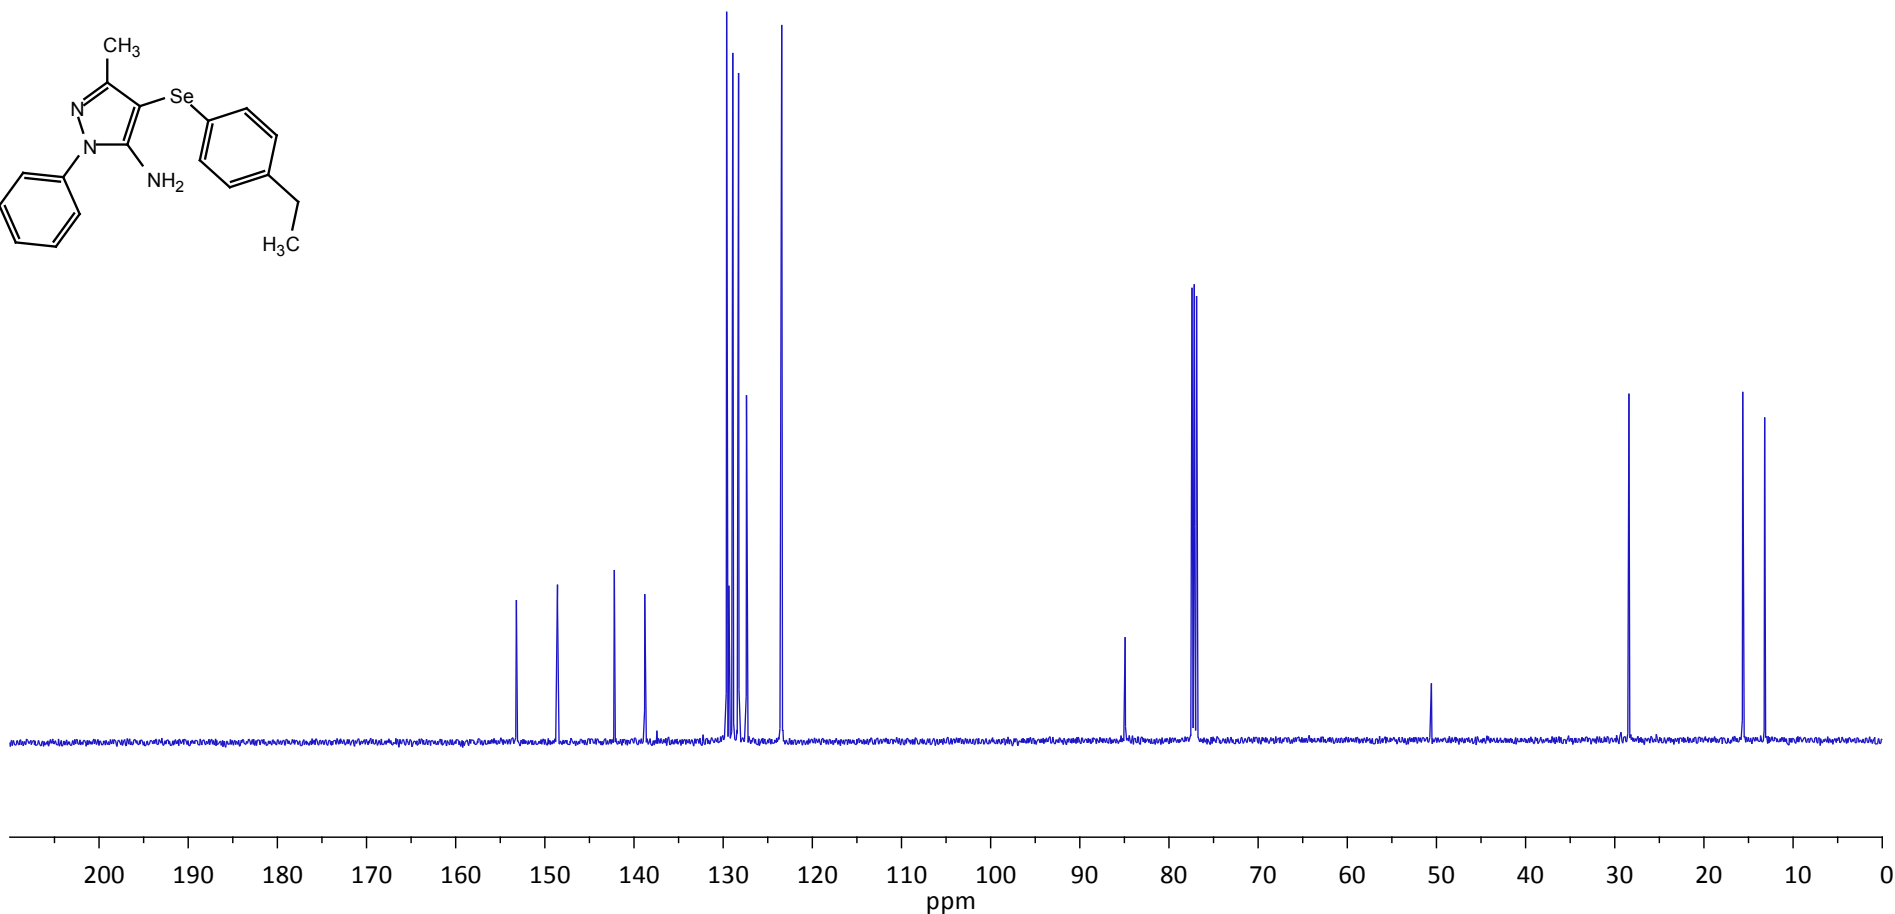

Comment s. mkrtyan =mj-2-k1f67112=A-13C.stan CDCl3  
 Number of Scans 1024  
 Spectrometer Frequency 125.76  
 Spectral Width 36057.7  
 Spectral Size 65536

Compound 5d

7.570  
7.568  
7.500  
7.485  
7.354  
7.339  
7.260

— 4.251

— 2.259

s. mkrtyan =mj-4-k1-f6078=1H.stan CDCl3

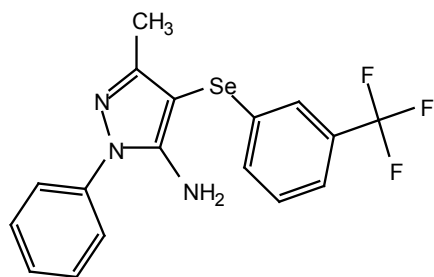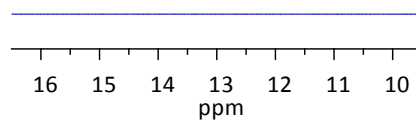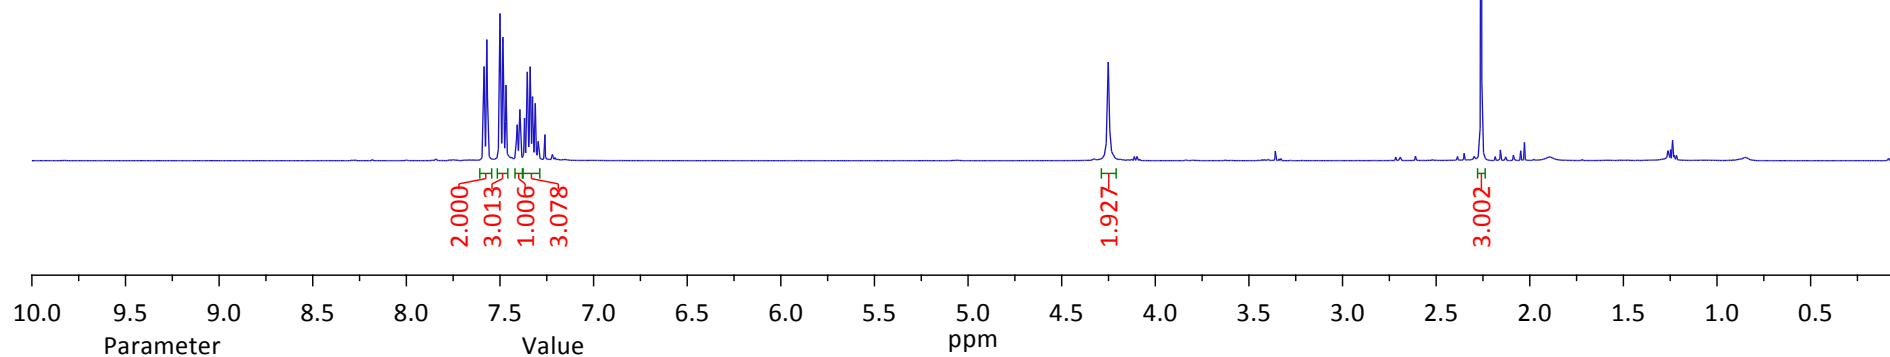

|                        |                                         |
|------------------------|-----------------------------------------|
| Comment                | s. mkrtyan =mj-4-k1-f6078=1H.stan CDCl3 |
| Number of Scans        | 32                                      |
| Spectrometer Frequency | 500.13                                  |
| Spectral Width         | 12335.5                                 |
| Spectral Size          | 65536                                   |

Compound 5d

s. mkrtyan =mj-4-k1-f6078=A-13C.stan CDCl3

153.124  
148.781  
138.650  
134.590  
131.670  
131.413  
131.020  
129.737  
129.591  
127.682  
124.960  
124.531  
124.500  
123.607  
122.763  
122.733

— 83.495

— 13.145

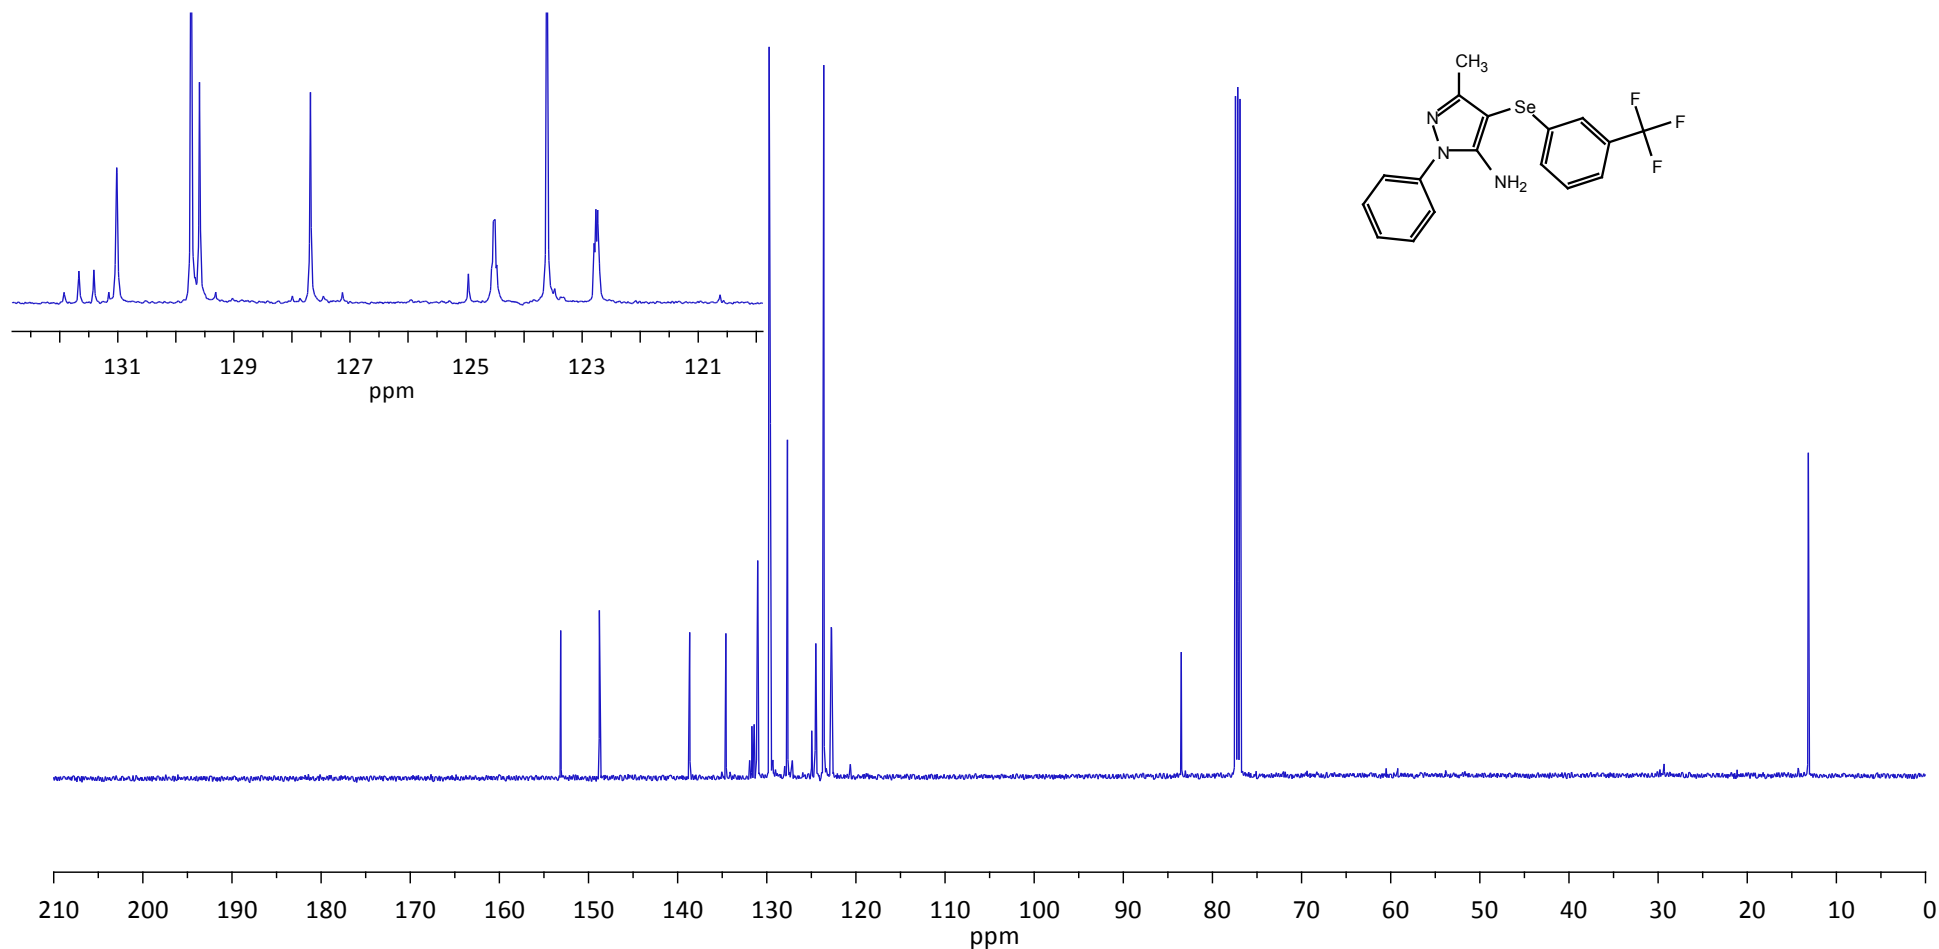

Comment s. mkrtyan =mj-4-k1-f6078=A-13C.stan CDCl3  
Number of Scans 2560  
Spectrometer Frequency 125.76  
Spectral Width 36057.7  
Spectral Size 65536

Compound 5e

7.584  
7.569  
7.567  
7.477  
7.435  
7.348  
7.305  
7.289  
7.260

— 4.253

— 2.248

m. jakubczyk =mj-25-ki-f32=1H.stan CDCl3

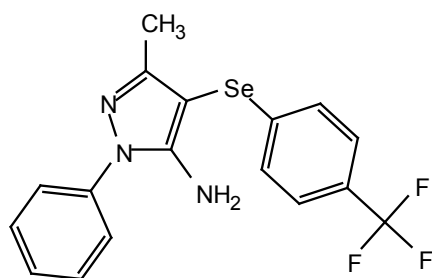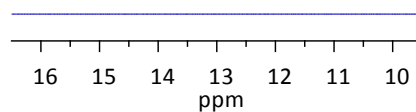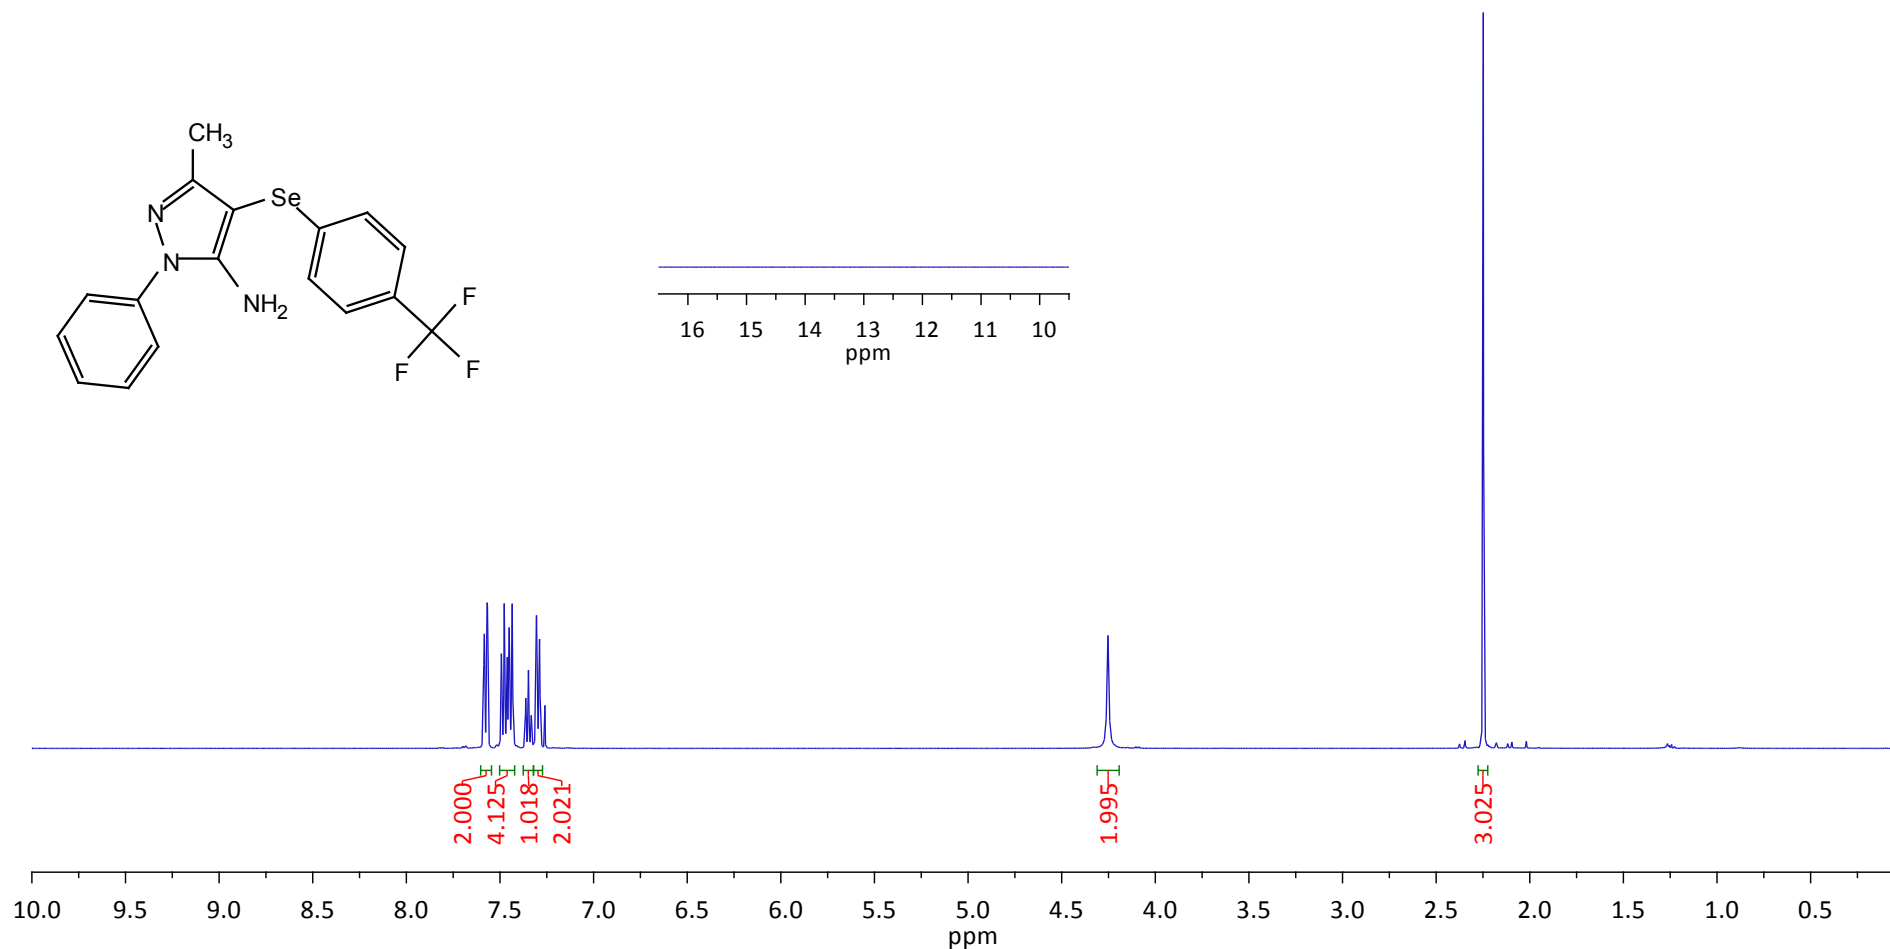

Comment m. jakubczyk =mj-25-ki-f32=1H.stan CDCl3  
 Number of Scans 32  
 Spectrometer Frequency 500.13  
 Spectral Width 12335.5  
 Spectral Size 65536

Compound 5e

m. jakubczyk =mj-25-ki-f32=A-13C.stan CDCl<sub>3</sub>

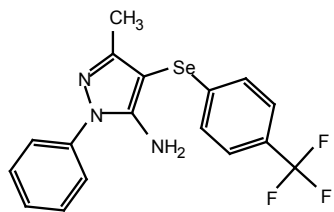

153.132  
148.780  
138.695  
138.617  
129.699  
128.194  
127.936  
127.623  
125.955  
125.926  
125.356  
123.486  
123.194  
83.233  
77.160  
13.101

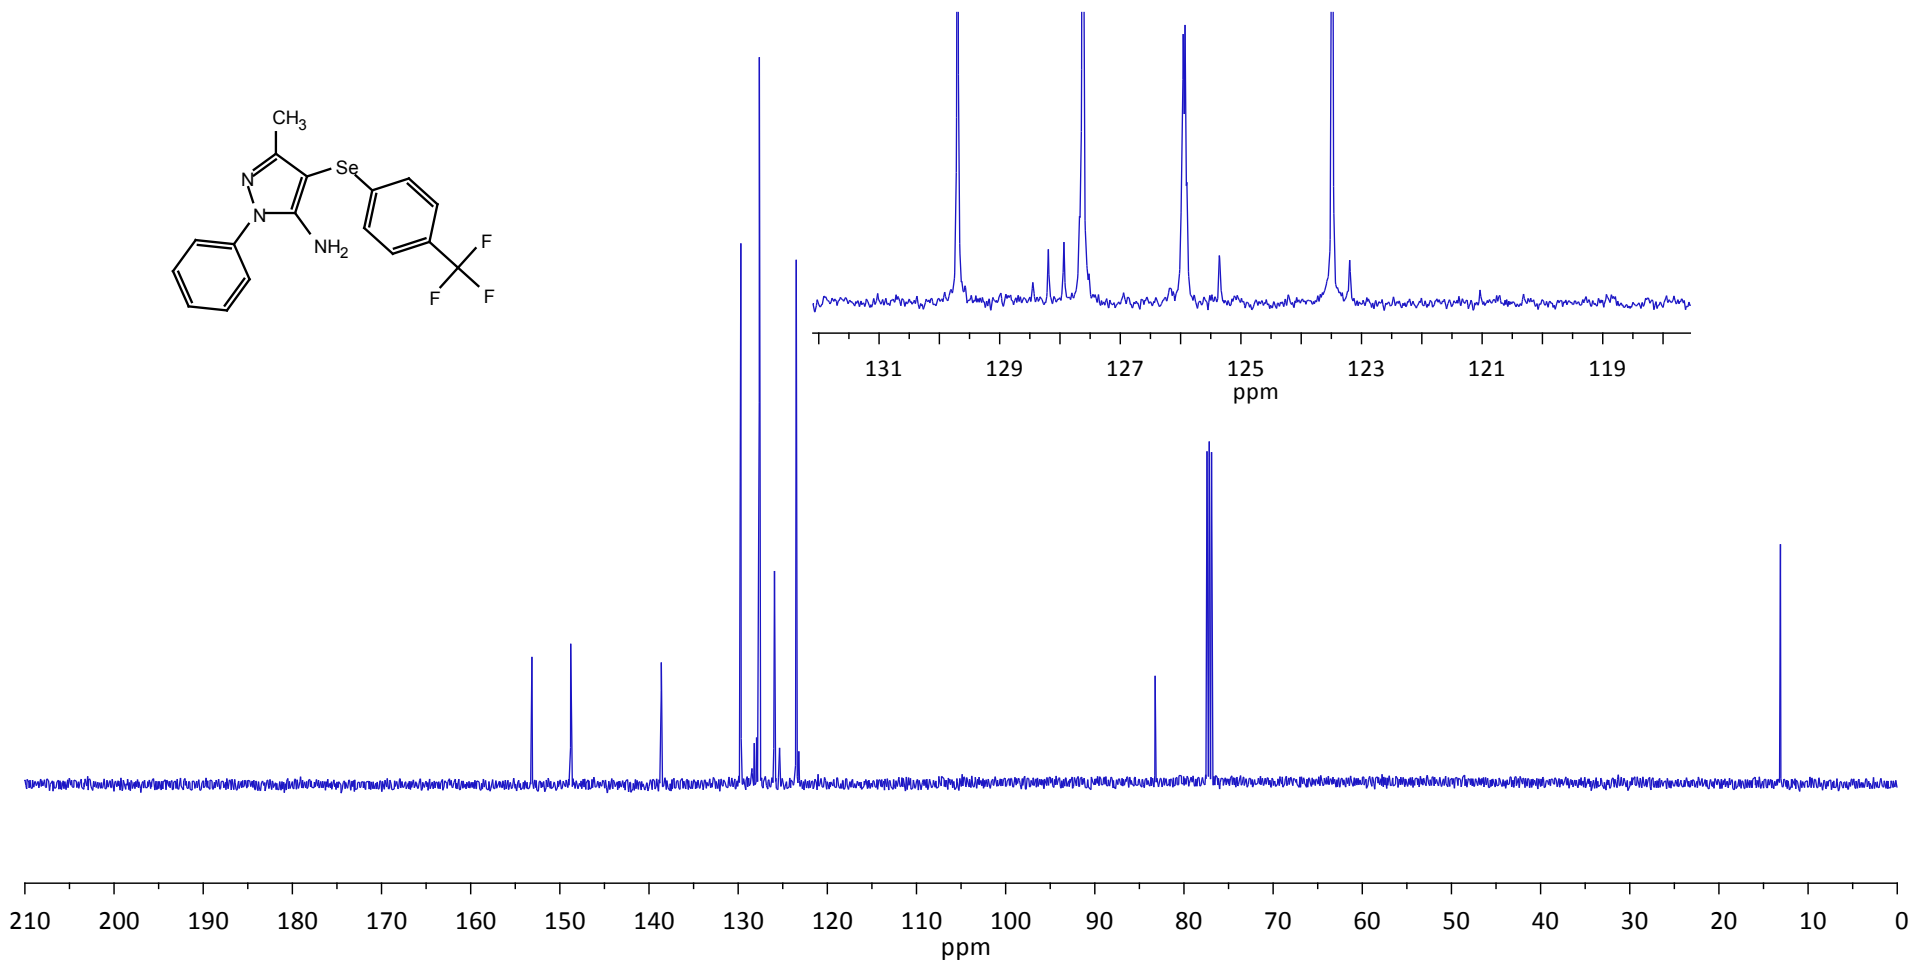

Comment m. jakubczyk =mj-25-ki-f32=A-13C.stan CDCl<sub>3</sub>  
 Number of Scans 256  
 Spectrometer Frequency 125.76  
 Spectral Width 36057.7  
 Spectral Size 65536

Compound 5f

7.554  
7.539  
7.537  
7.437  
7.310  
7.260  
6.990  
6.973  
6.972  
6.967  
6.958

4.284

2.235

m. jakubczyk =mj-24-ki-f3252=1H.stan CDCl3

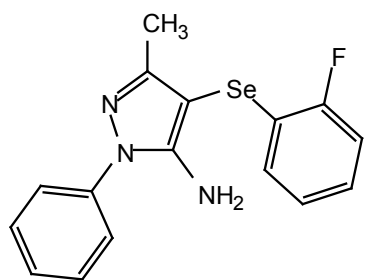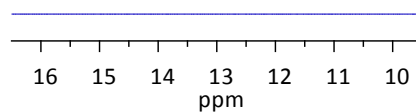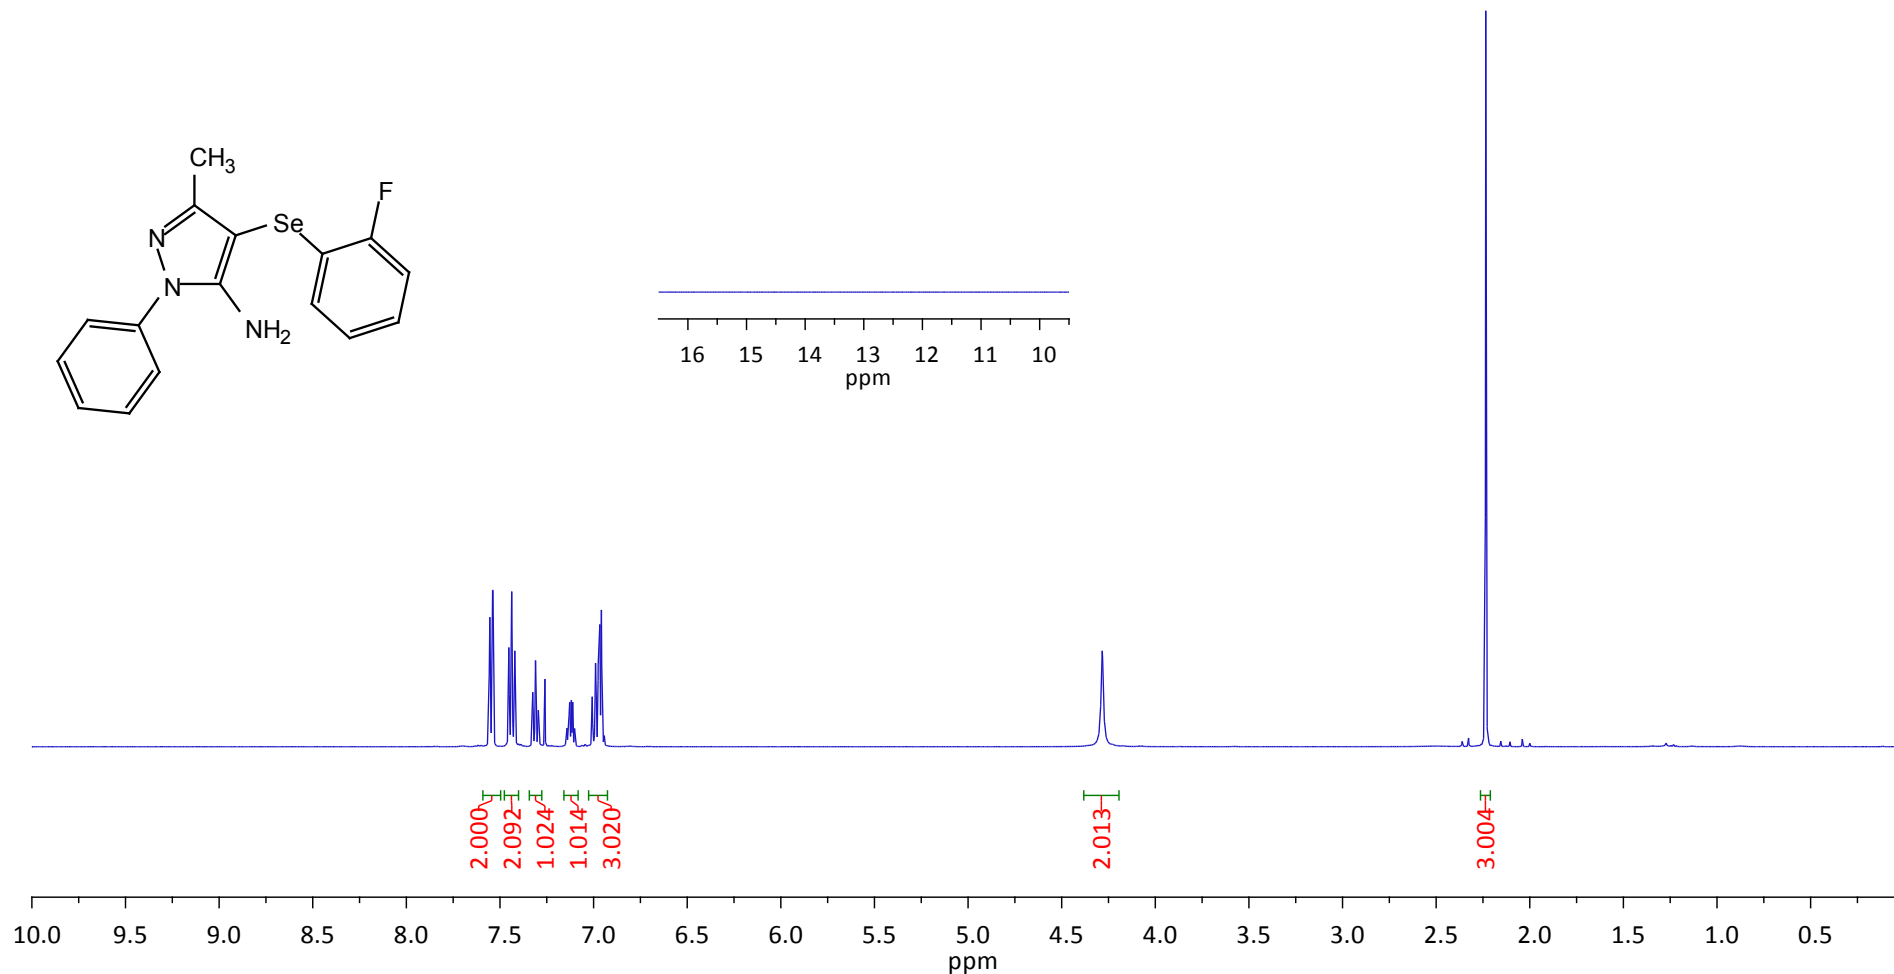

Comment m. jakubczyk =mj-24-ki-f3252=1H.stan CDCl3  
Number of Scans 32  
Spectrometer Frequency 500.13  
Spectral Width 12335.5  
Spectral Size 65536

Compound 5f

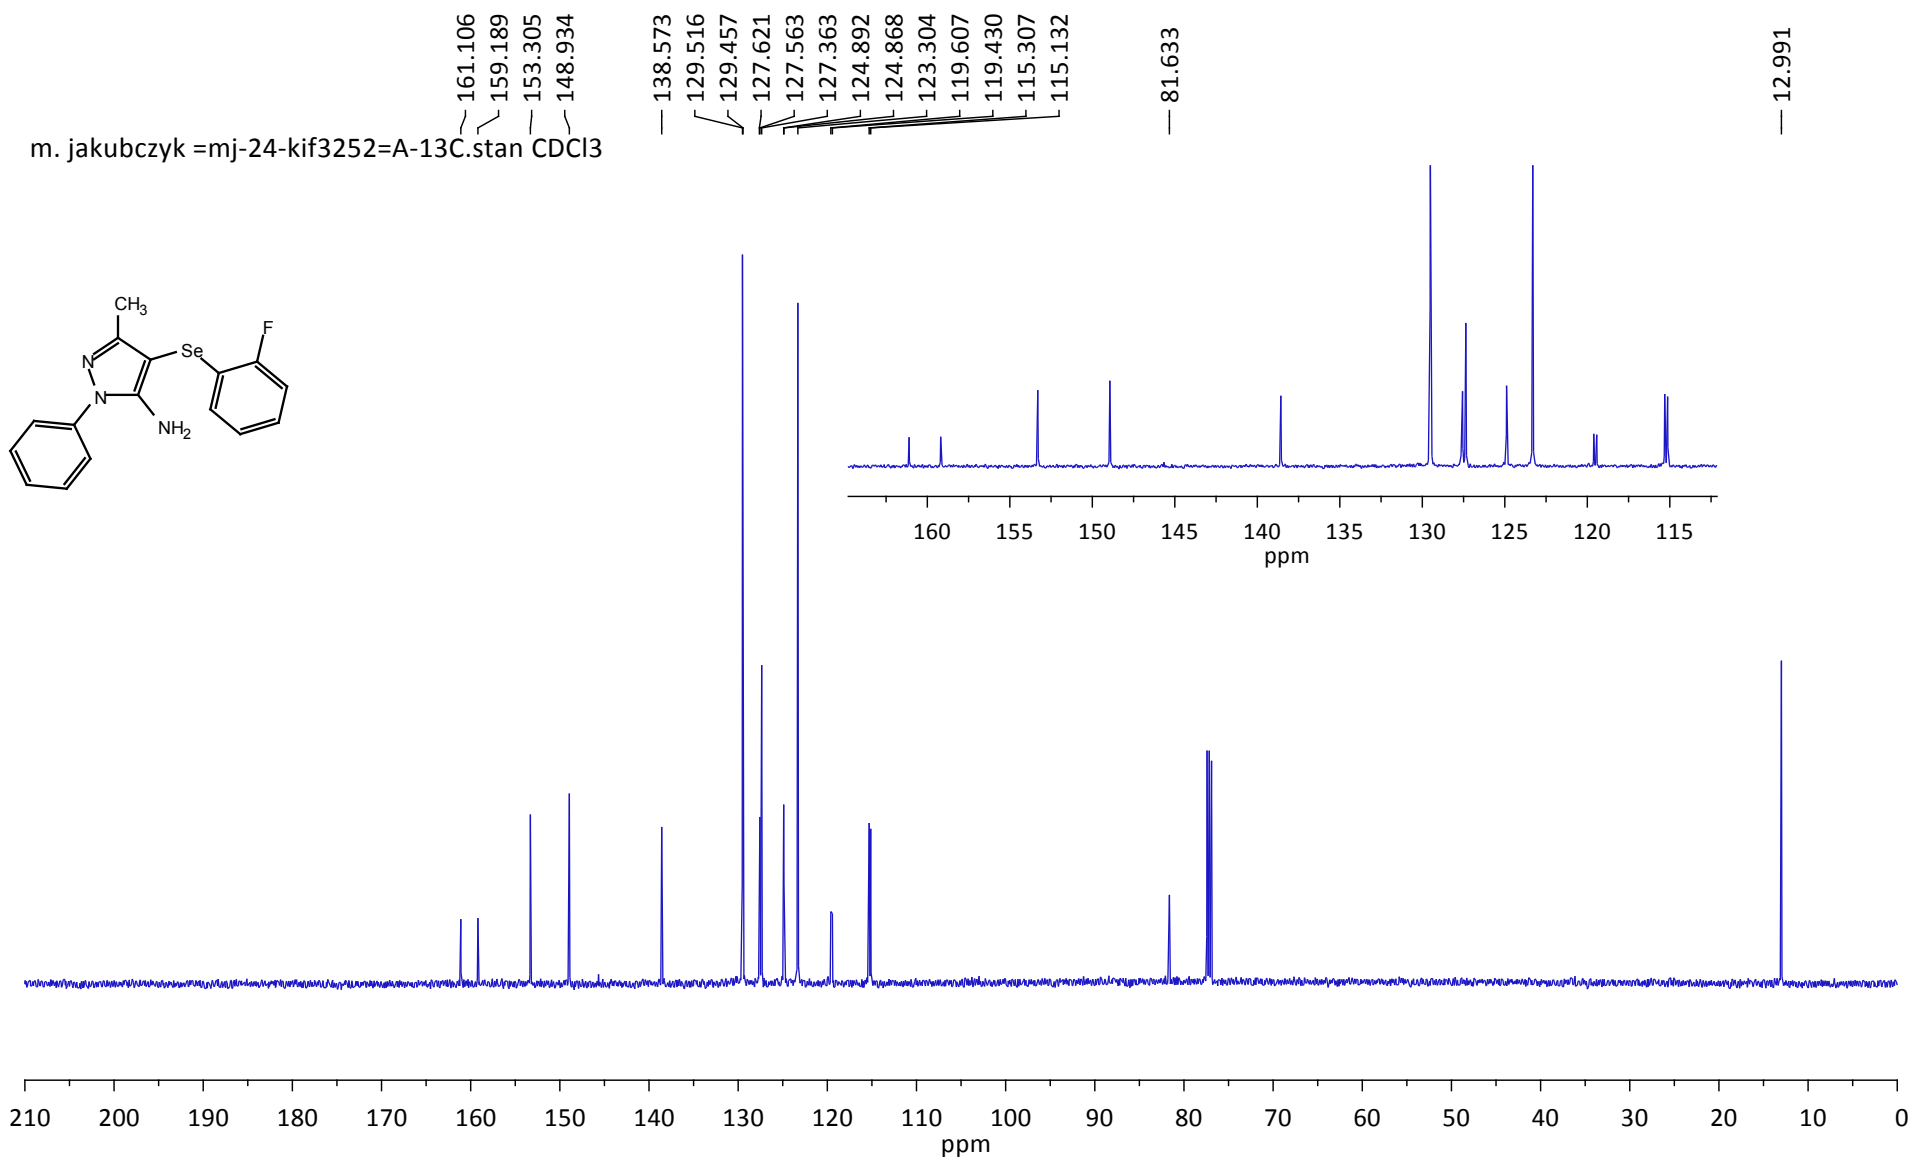

Comment m. jakubczyk =mj-24-kif3252=A-13C.stan CDCl3

Number of Scans 256

Spectrometer Frequency 125.76

Spectral Width 36057.7

Spectral Size 65536



Compound 5g

7.593  
7.578  
7.484  
7.350  
7.178  
7.166  
7.018  
7.002  
6.901  
6.883  
6.840

4.233

2.260

s. mkrtyan =mj-53-4554=1H.stan CDCl3

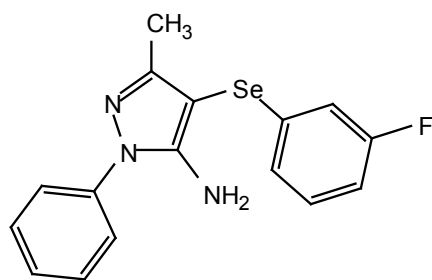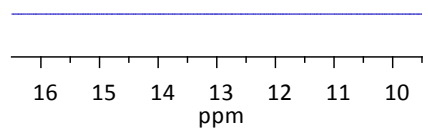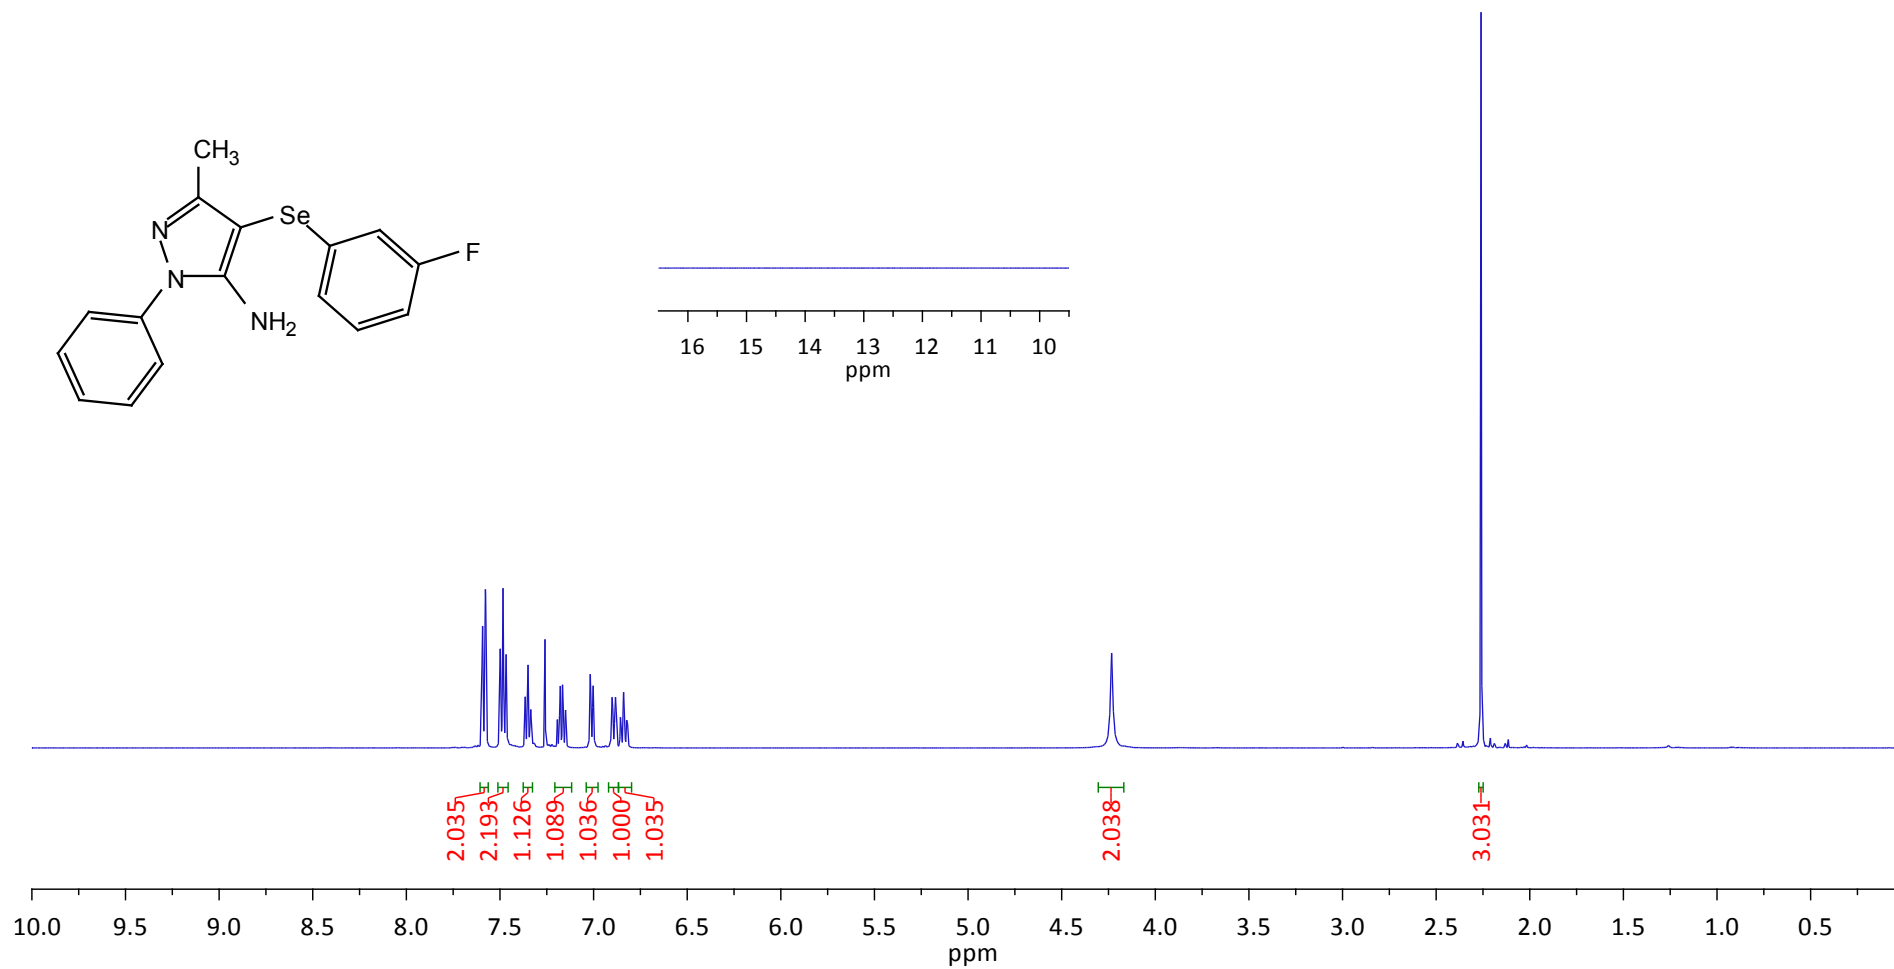

Comment s. mkrtyan =mj-53-4554=1H.stan CDCl3  
Number of Scans 32  
Spectrometer Frequency 500.13  
Spectral Width 12335.5  
Spectral Size 65536

Compound 5g

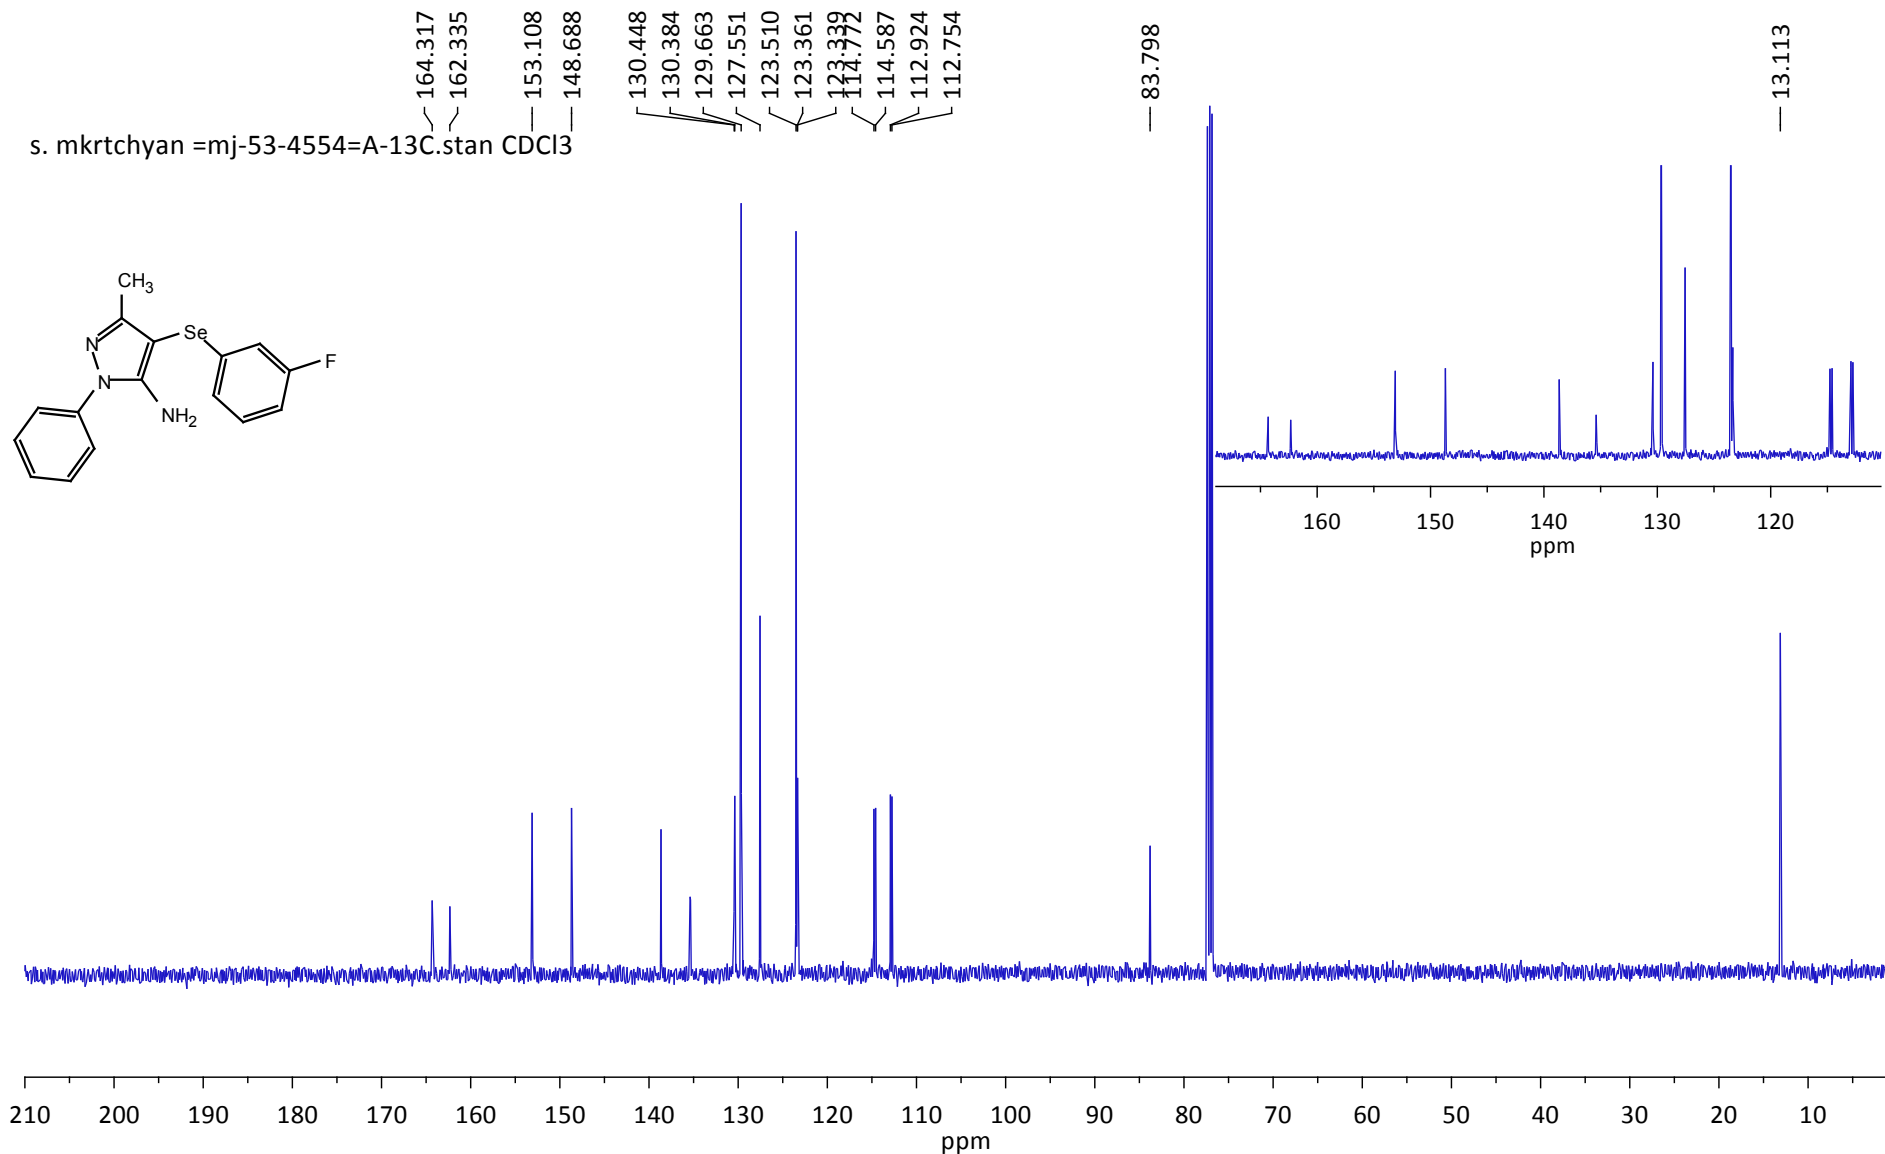

Comment s. mkrтчyan =mj-53-4554=A-13C.stan CDCl3  
 Number of Scans 256  
 Spectrometer Frequency 125.76  
 Spectral Width 36057.7  
 Spectral Size 65536

Compound 5h

7.584  
7.569  
7.567  
7.478  
7.344  
7.260  
7.212  
7.202  
7.195  
7.184  
6.930

4.236

2.267

m. jakubczyk =mj-26-ki-f2841=1H.stan CDCl3

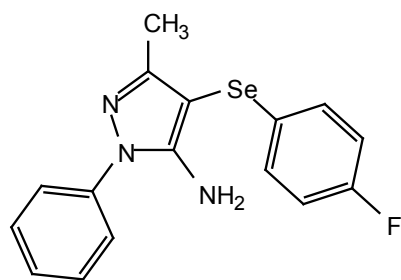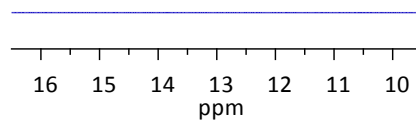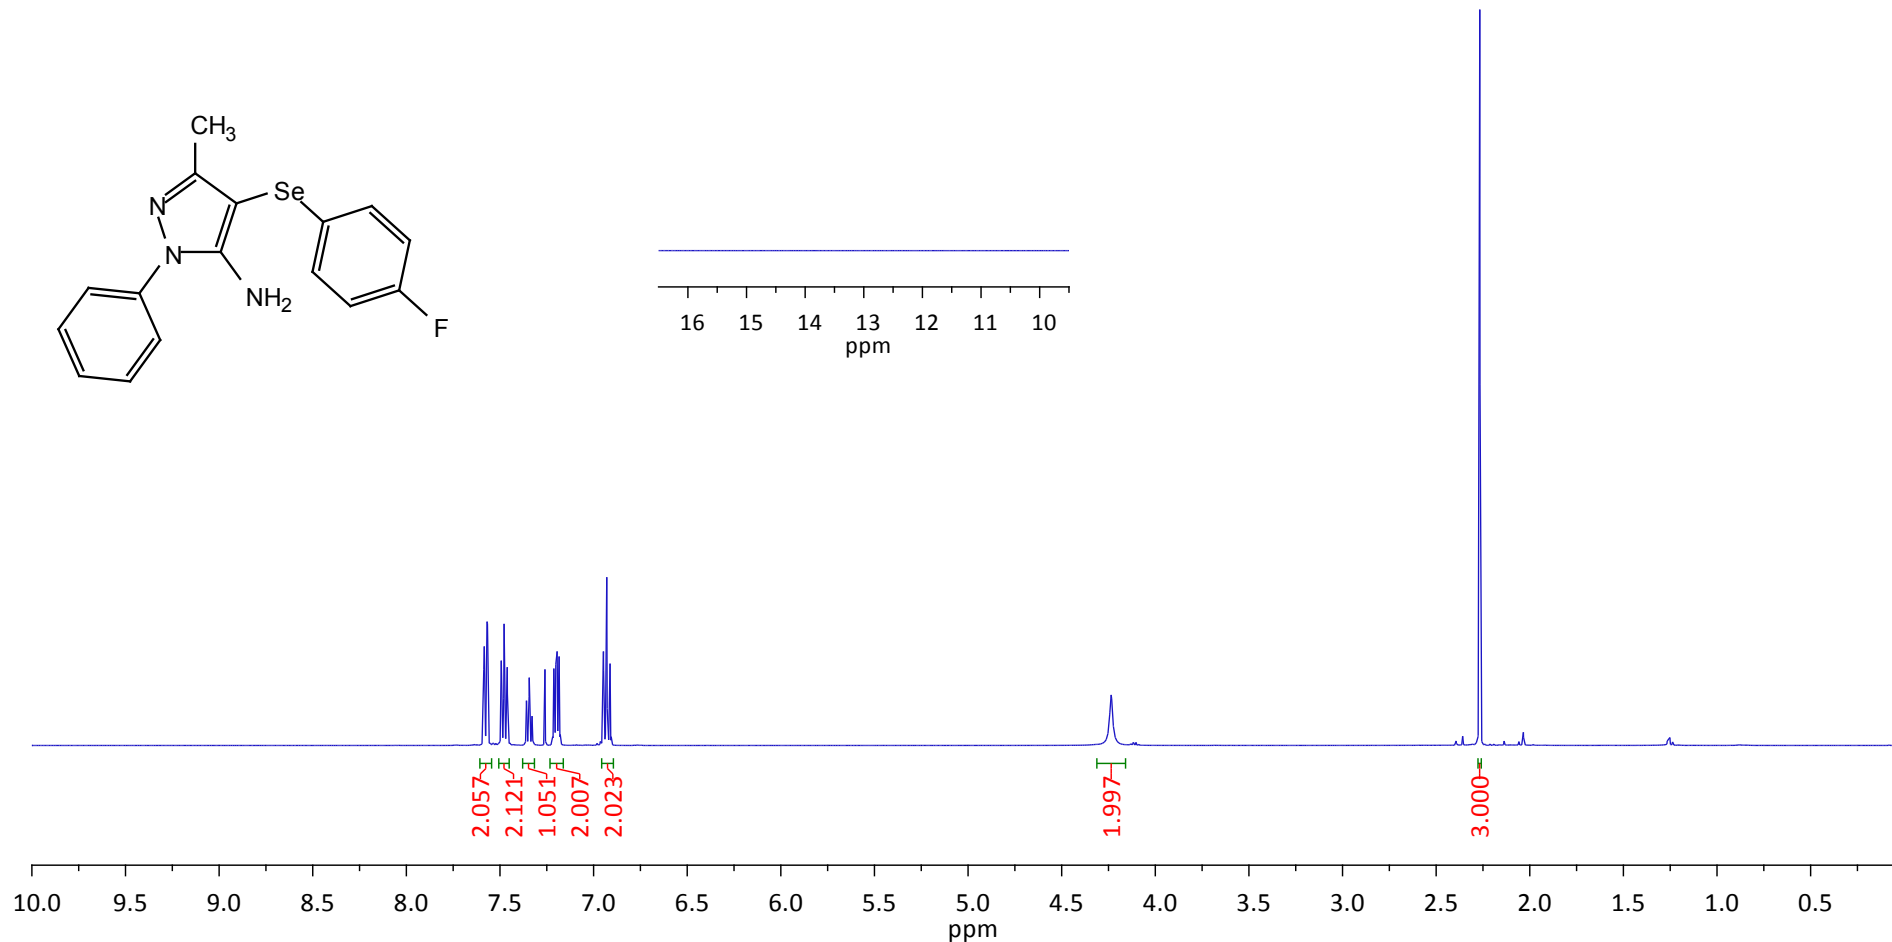

Comment m. jakubczyk =mj-26-ki-f2841=1H.stan CDCl3  
 Number of Scans 32  
 Spectrometer Frequency 500.13  
 Spectral Width 12335.5  
 Spectral Size 65536

Compound 5h

m. jakubczyk =mj-26-ki-f2841=A-13C.stan CDCl3

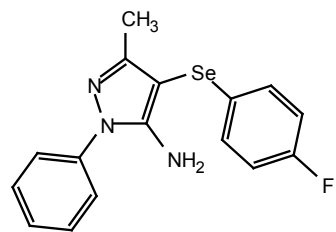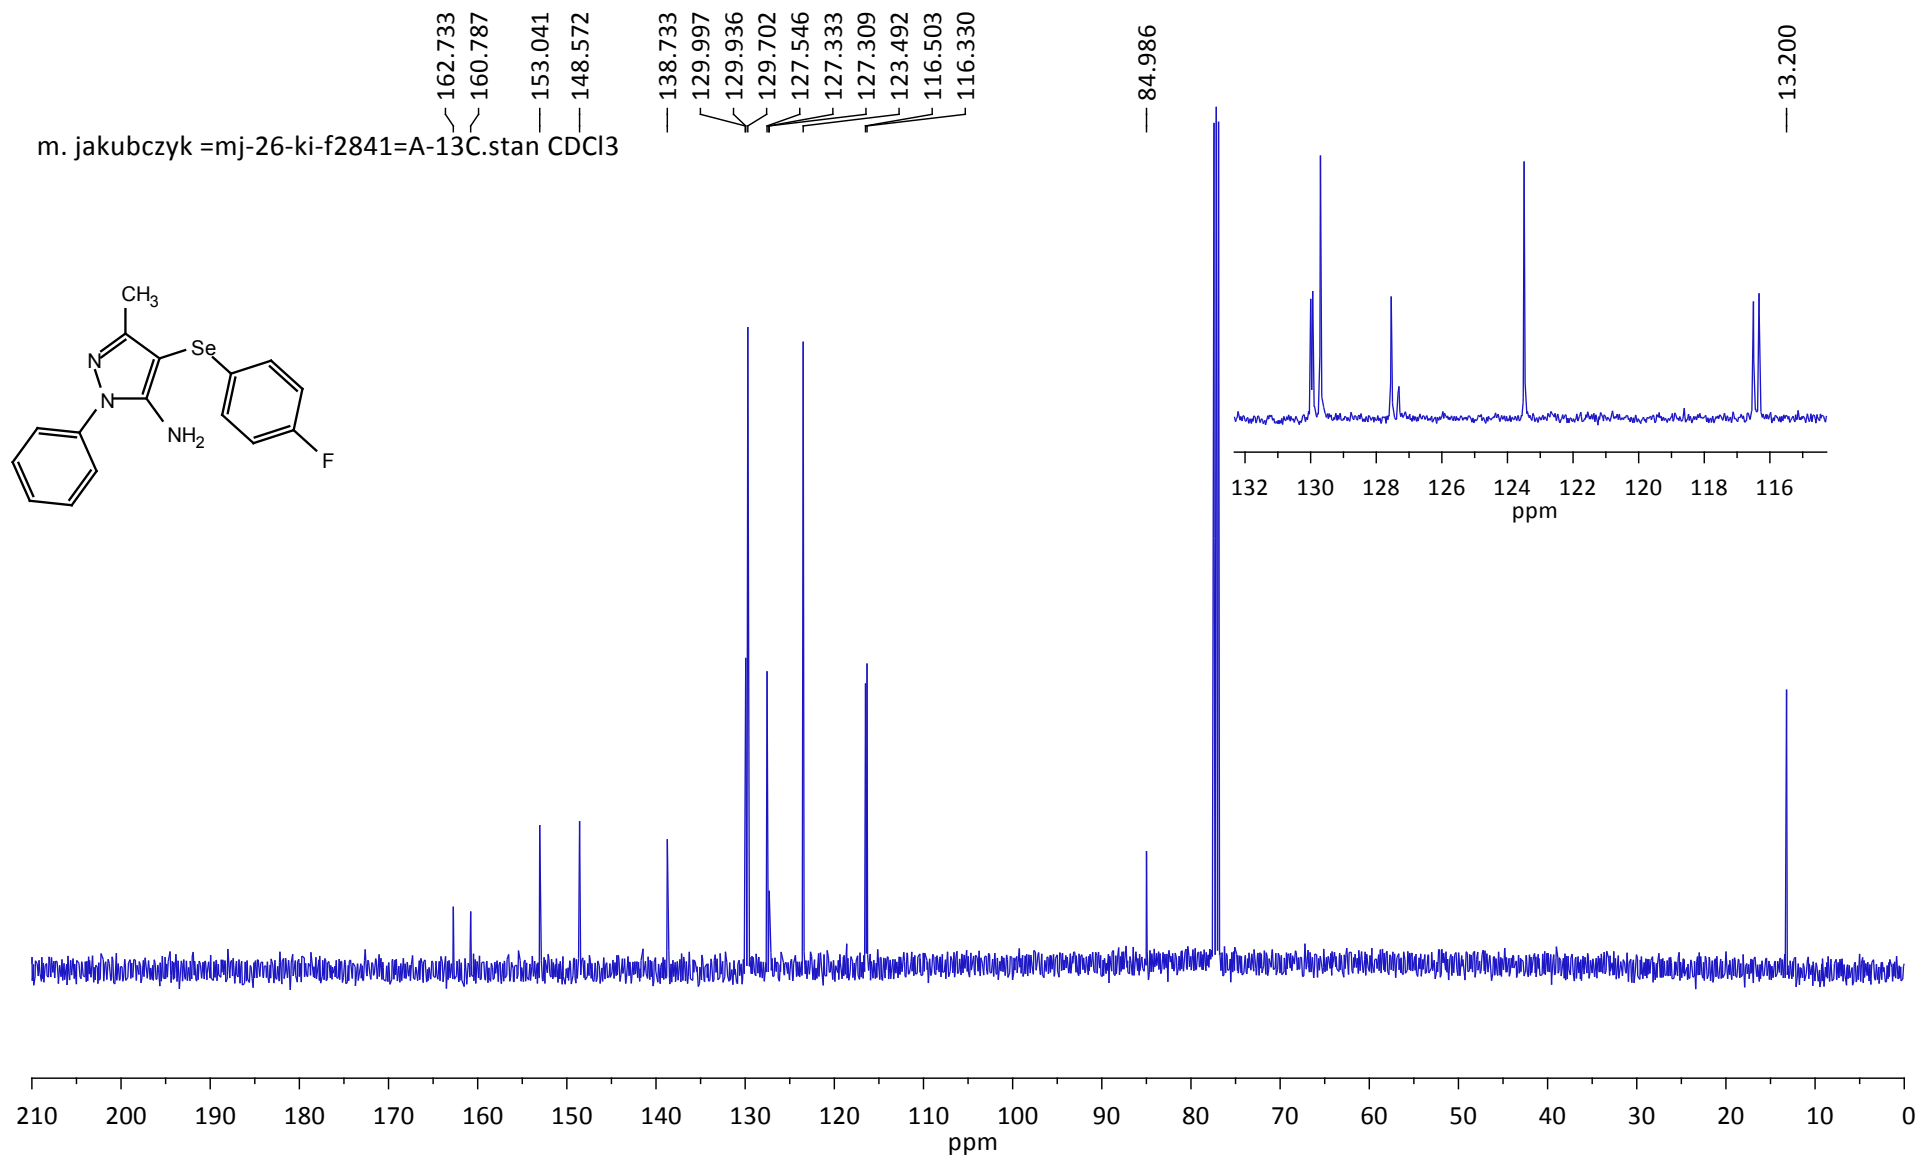

|                        |                                               |
|------------------------|-----------------------------------------------|
| Comment                | m. jakubczyk =mj-26-ki-f2841=A-13C.stan CDCl3 |
| Number of Scans        | 256                                           |
| Spectrometer Frequency | 125.76                                        |
| Spectral Width         | 36057.7                                       |
| Spectral Size          | 65536                                         |

Compound 5i

s. mkrtyan =MJa-3KI-F6875=1H.stan CDCl3

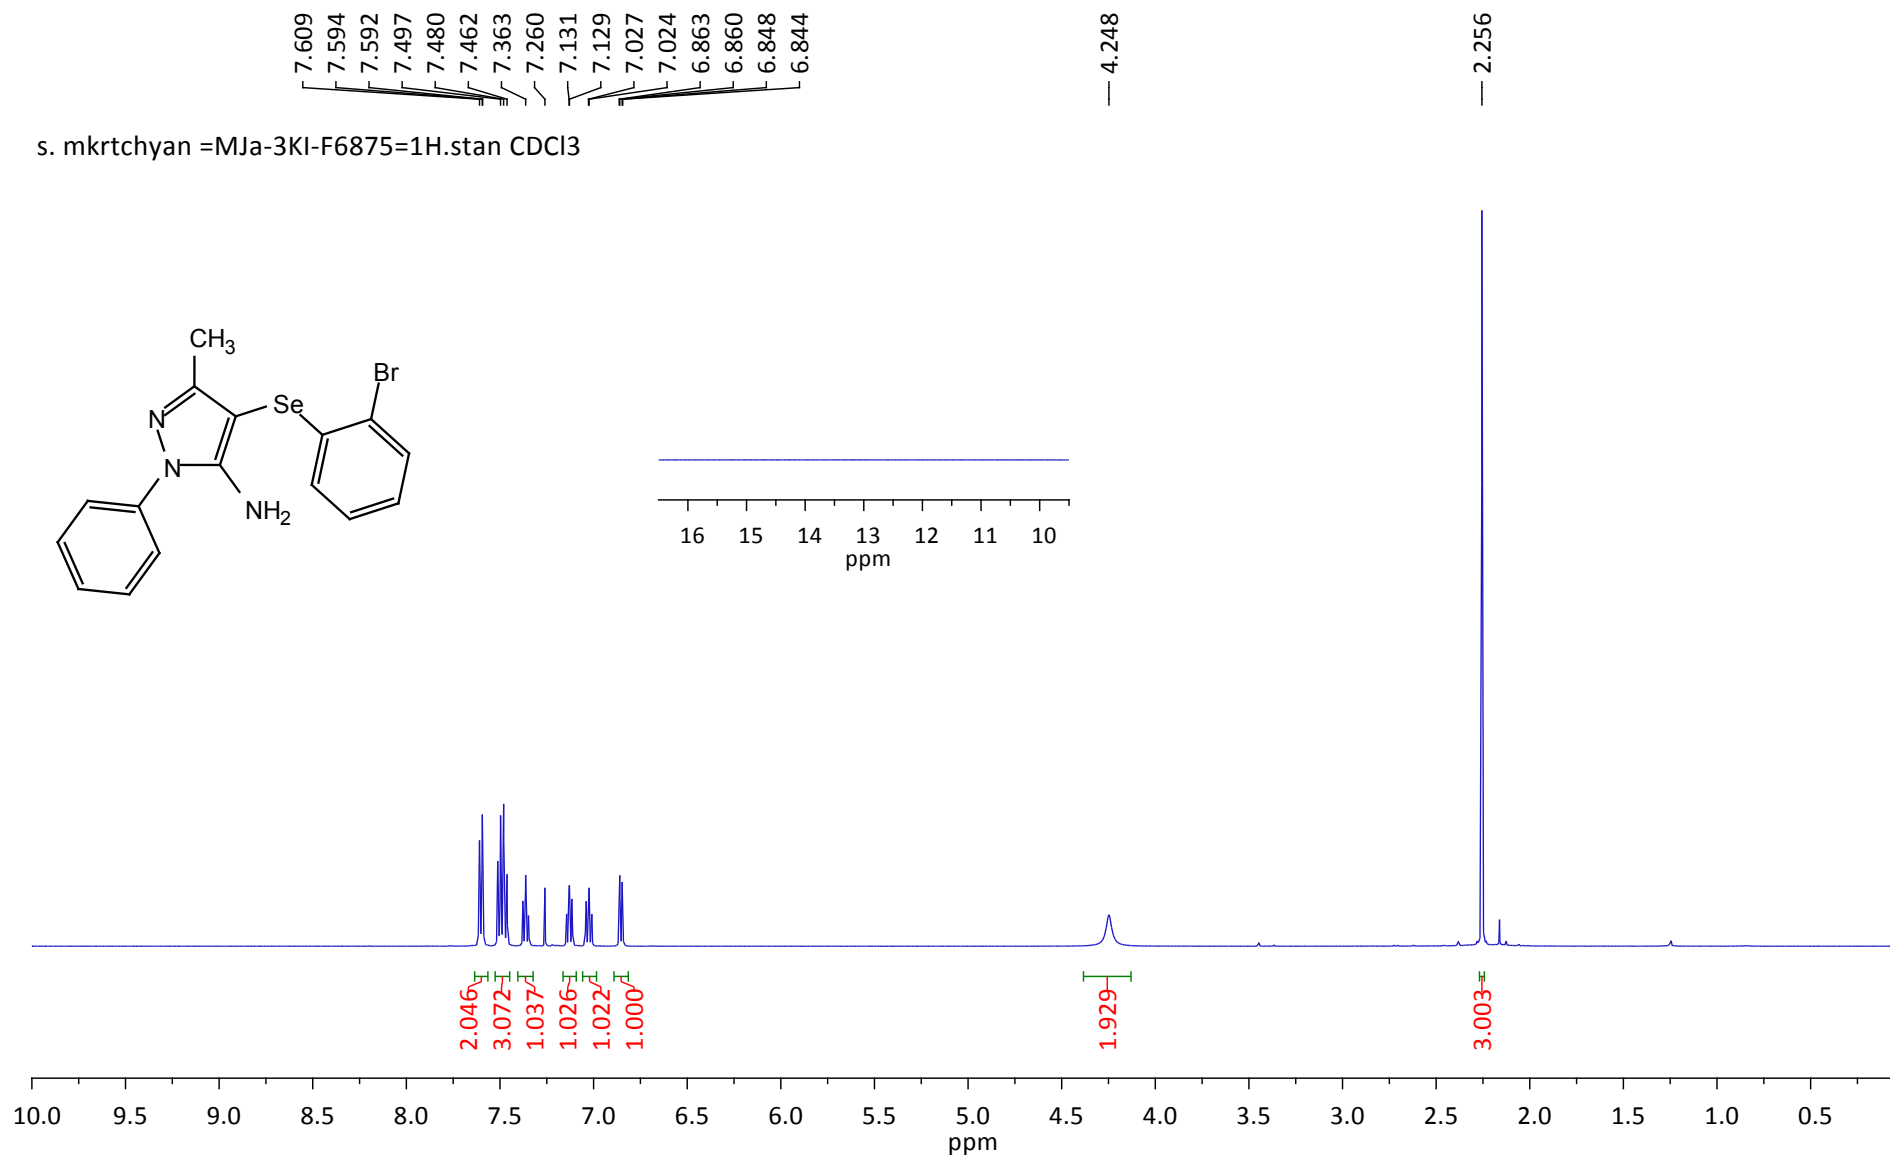

|                        |                                         |
|------------------------|-----------------------------------------|
| Comment                | s. mkrtyan =MJa-3KI-F6875=1H.stan CDCl3 |
| Number of Scans        | 32                                      |
| Spectrometer Frequency | 500.13                                  |
| Spectral Width         | 12335.5                                 |
| Spectral Size          | 65536                                   |

Compound 5i

s. mkrtyan =MJa-3KI-F6875=A-13C.stan CDCl3

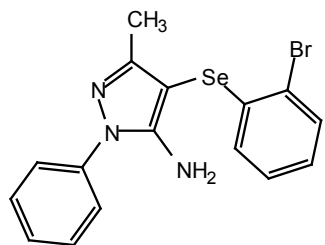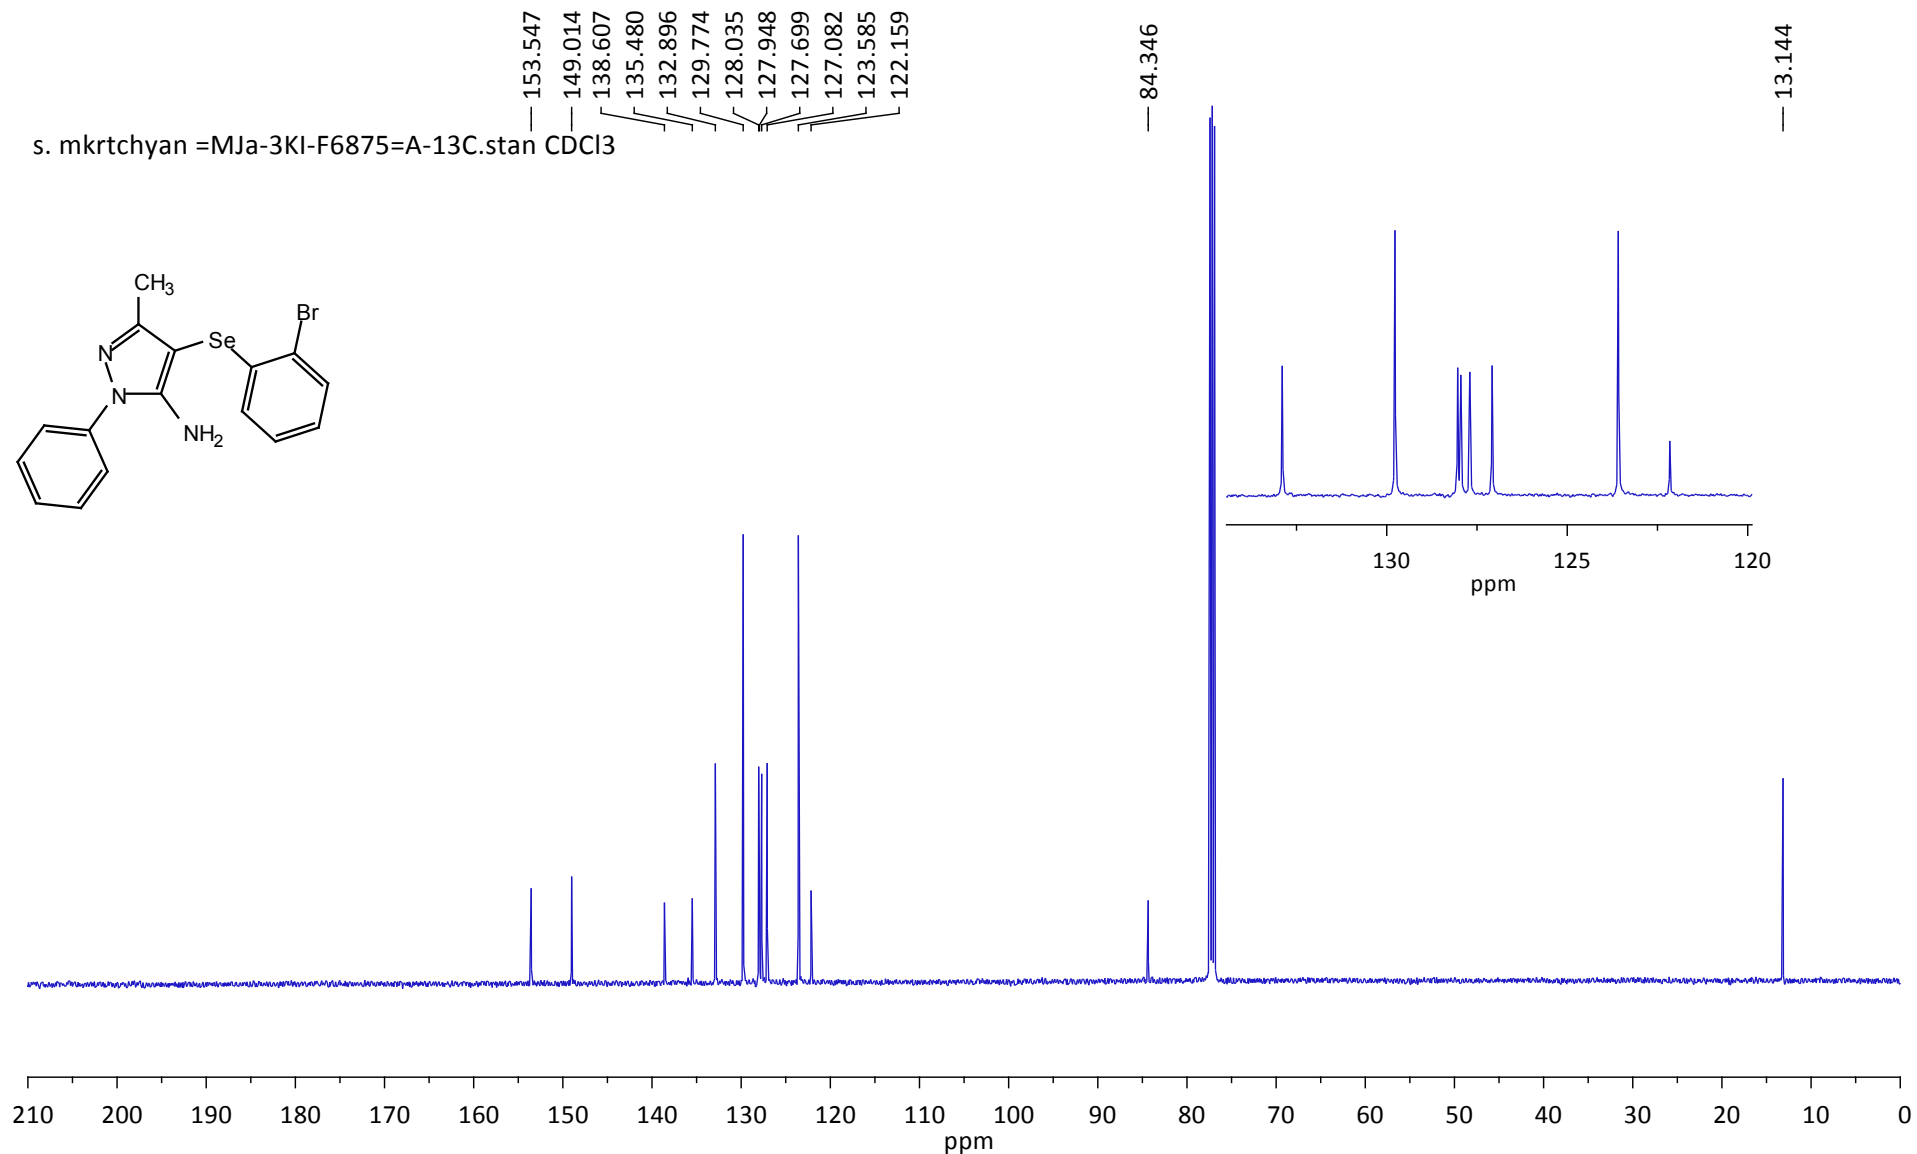

|                        |                                            |
|------------------------|--------------------------------------------|
| Comment                | s. mkrtyan =MJa-3KI-F6875=A-13C.stan CDCl3 |
| Number of Scans        | 3072                                       |
| Spectrometer Frequency | 125.76                                     |
| Spectral Width         | 36057.7                                    |
| Spectral Size          | 65536                                      |

Compound 5j

7.600  
7.598  
7.583  
7.581  
7.500  
7.367  
7.260  
7.182  
7.157

s. mkrtyan =mj-17-ki-f53593=1H.stan CDCl3

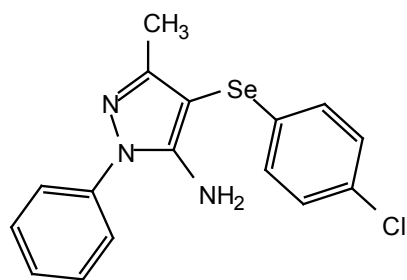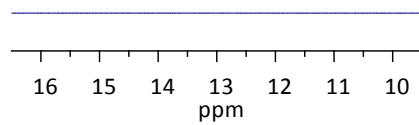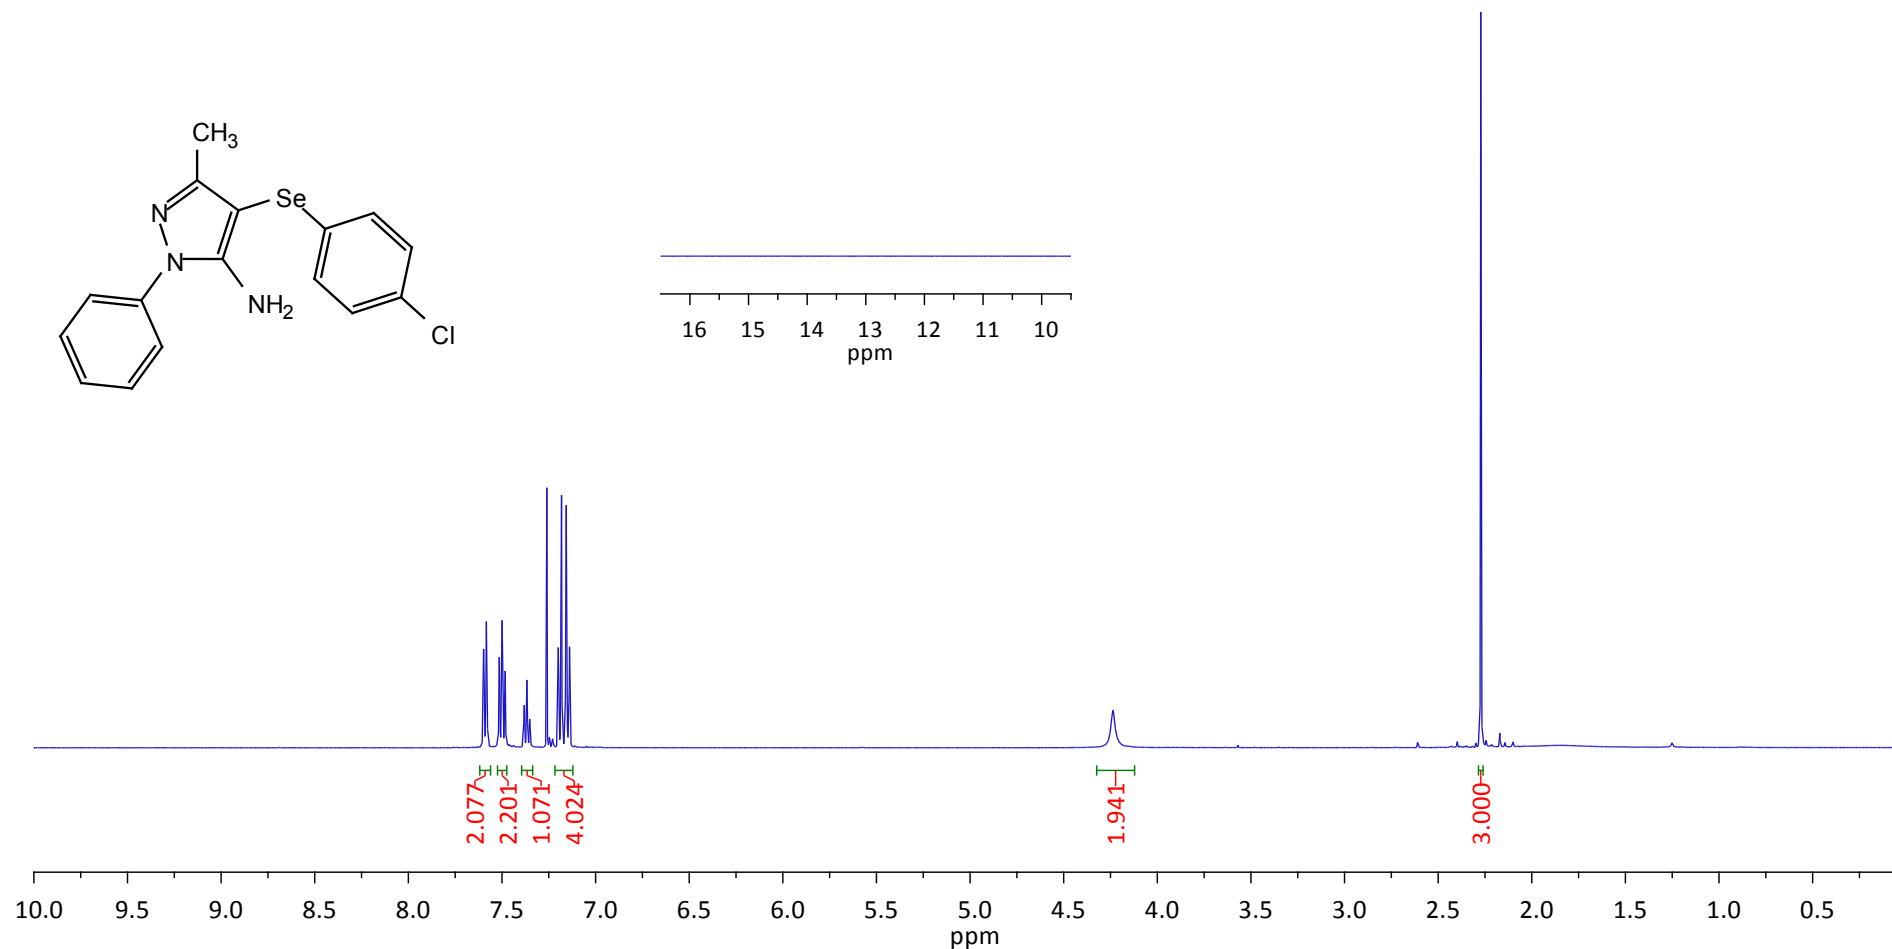

Comment s. mkrtyan =mj-17-ki-f53593=1H.stan CDCl3  
Number of Scans 24  
Spectrometer Frequency 500.13  
Spectral Width 12335.5  
Spectral Size 65536

Compound 5j

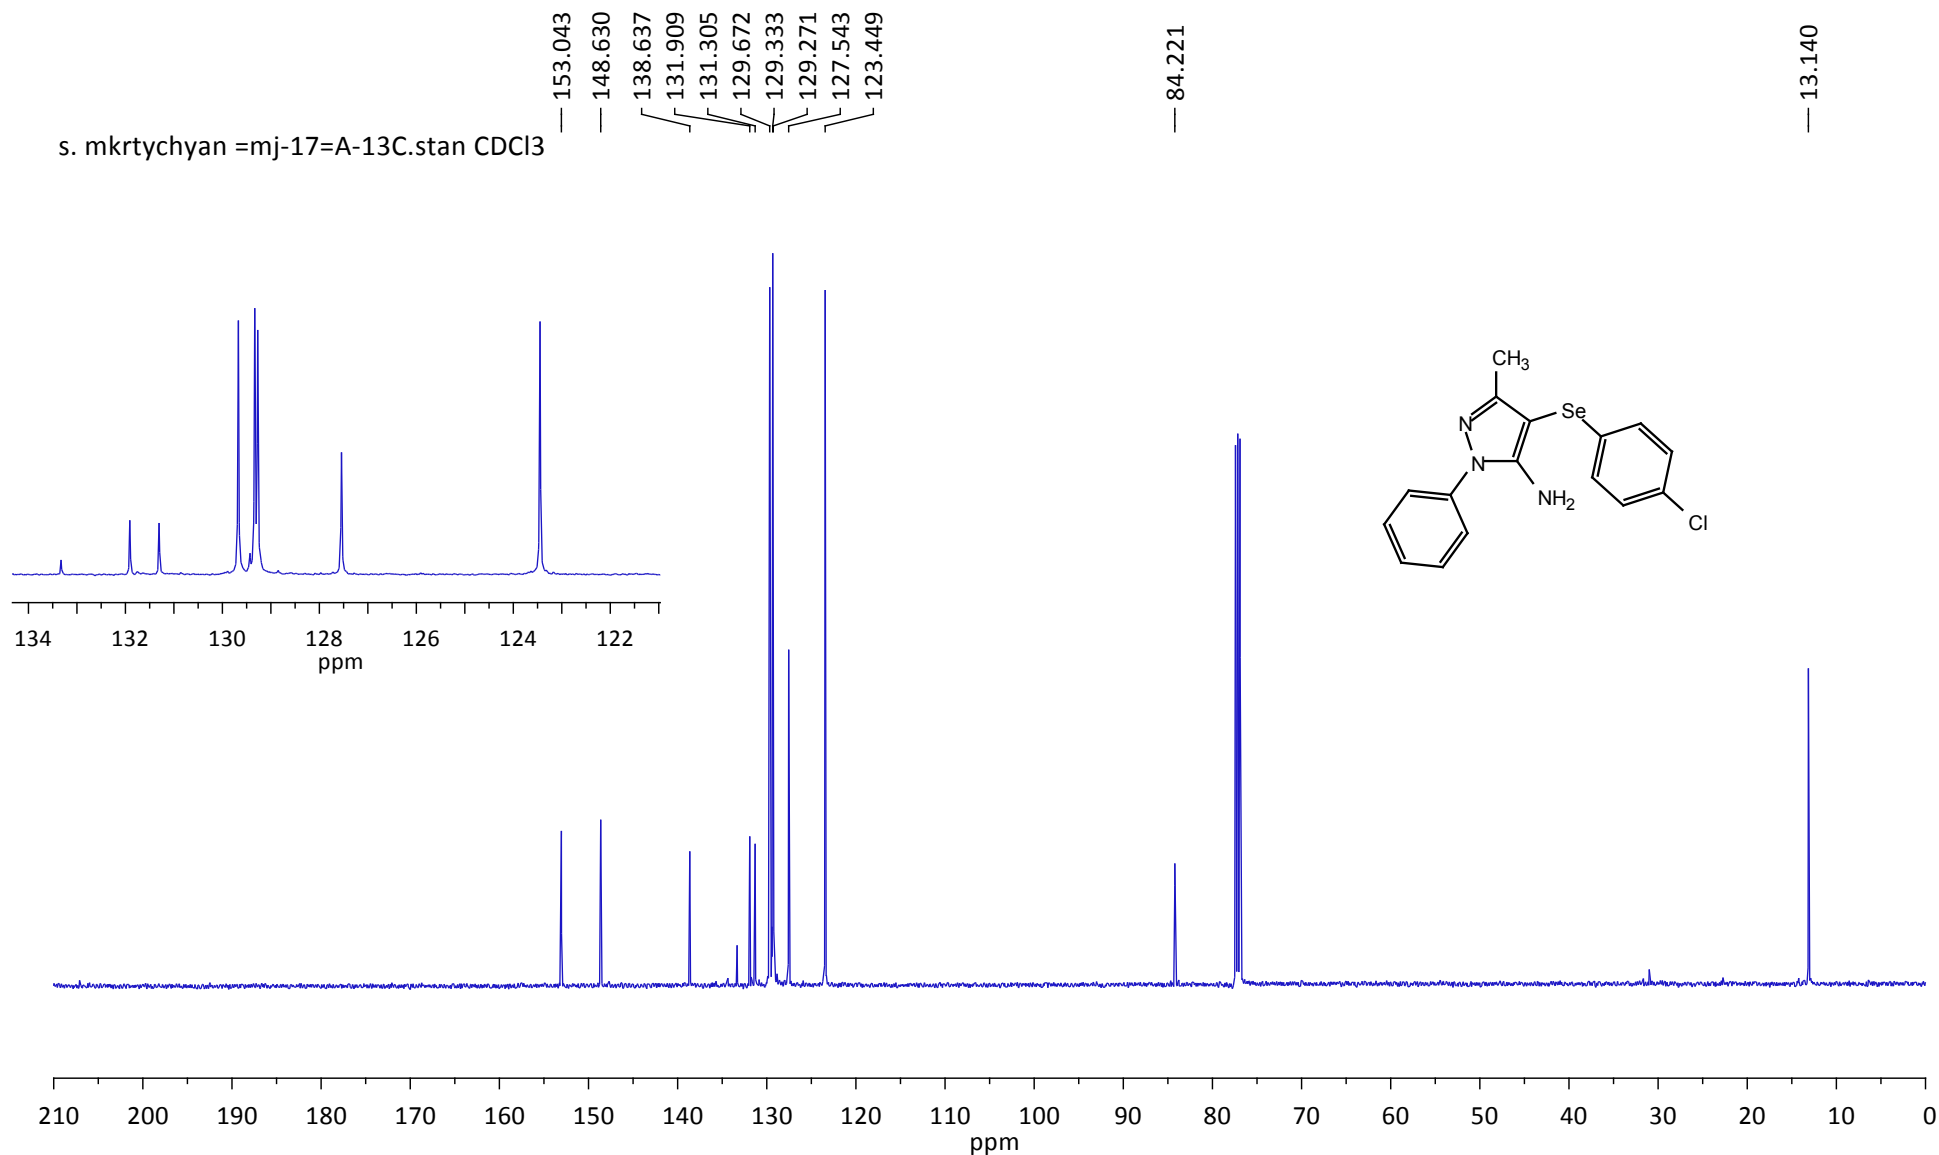

Comment s. mkrtychyan =mj-17=A-13C.stan CDCl3  
 Number of Scans 1744  
 Spectrometer Frequency 125.76  
 Spectral Width 36057.7  
 Spectral Size 65536



Compound 5k

8.083  
8.010  
8.008  
8.005  
8.004  
7.994  
7.992  
7.989  
7.987  
7.605  
7.602  
7.588  
7.586  
7.510  
7.380  
7.260

— 4.275

— 2.272

s. mkrtyan =mj-18-ki-f138163-2=1H.stan CDCl3

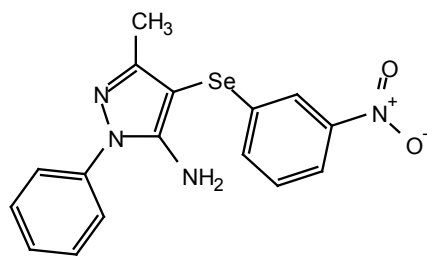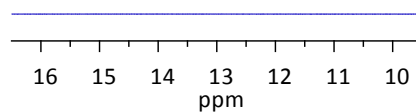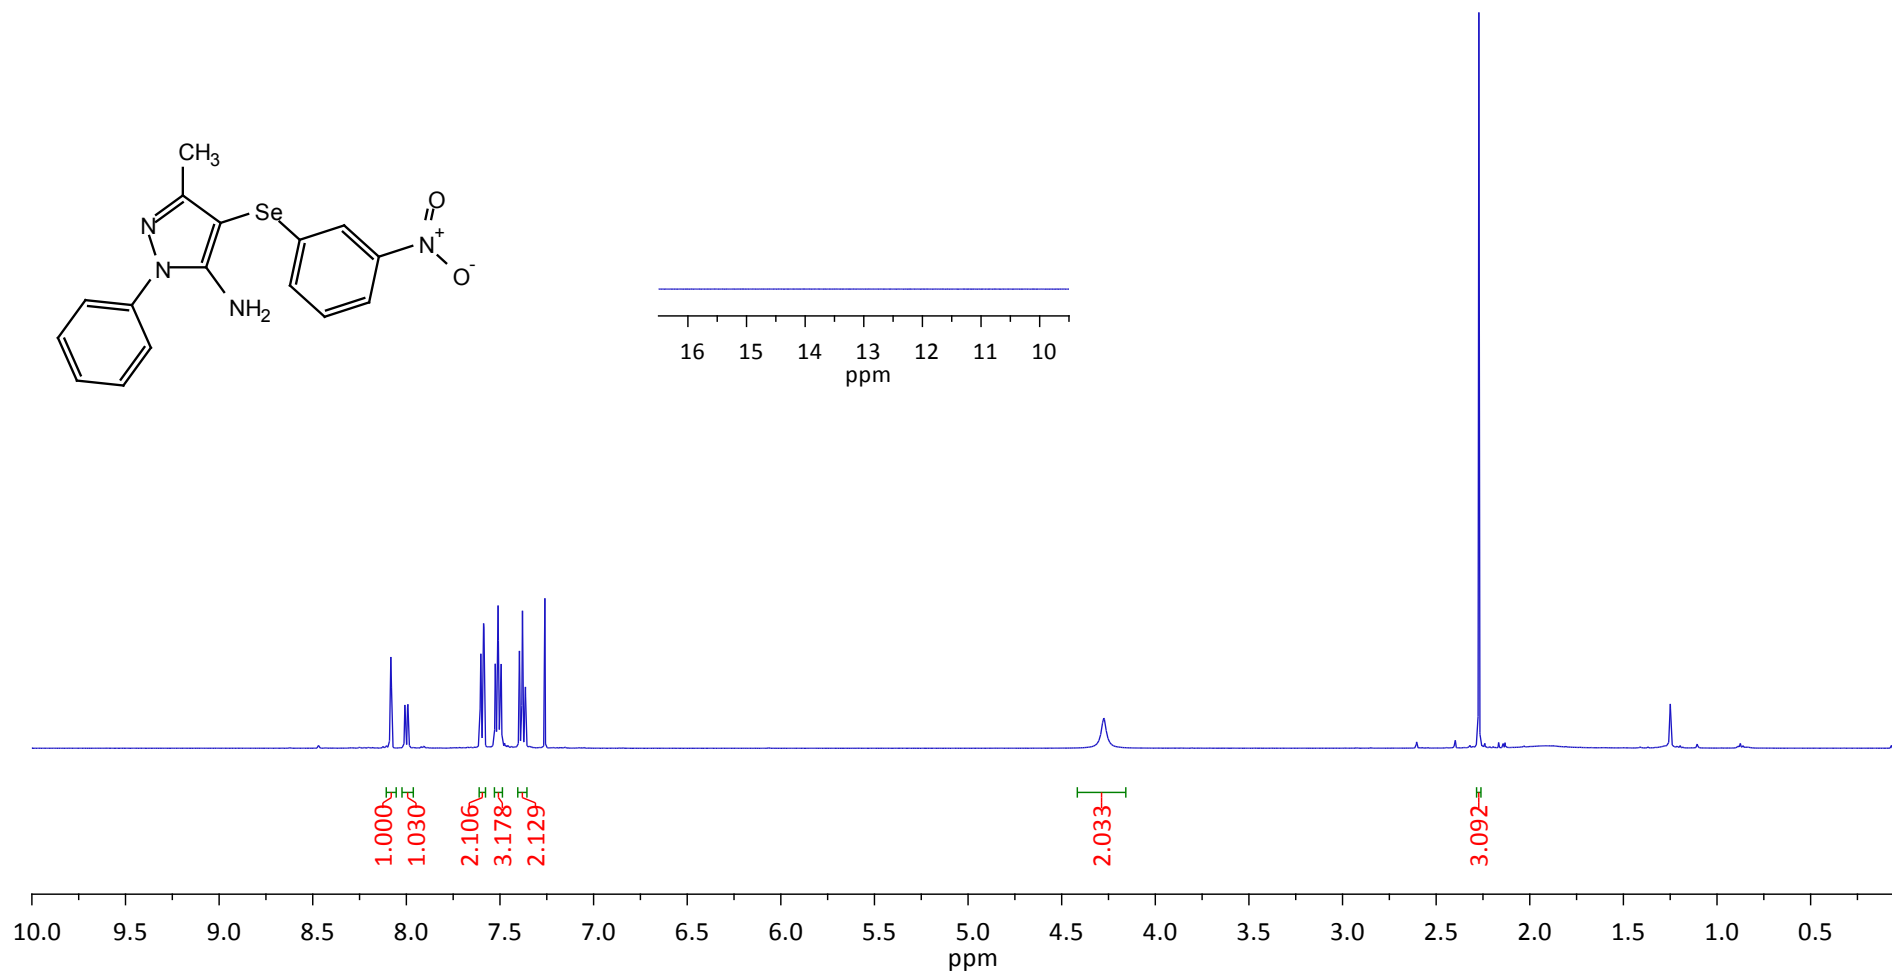

Comment s. mkrtyan =mj-18-ki-f138163-2=1H.stan CDCl3  
 Number of Scans 24  
 Spectrometer Frequency 500.13  
 Spectral Width 12335.5  
 Spectral Size 65536

Compound 5k

s. mkrtyan =mj-18-ki-f138163-2=A-13C.stan CDCl<sub>3</sub>

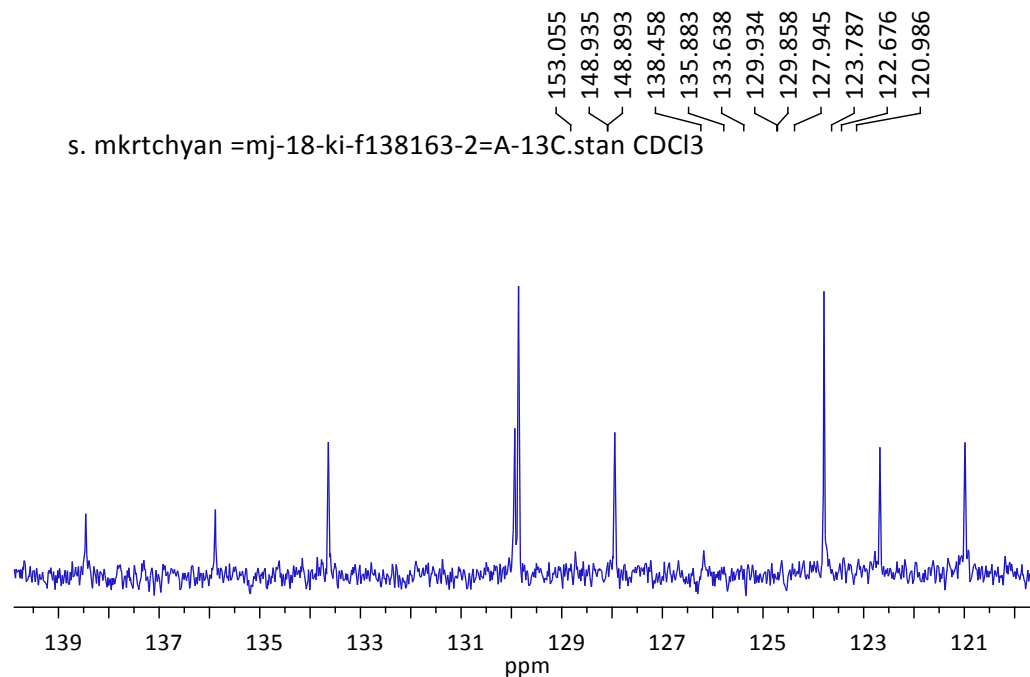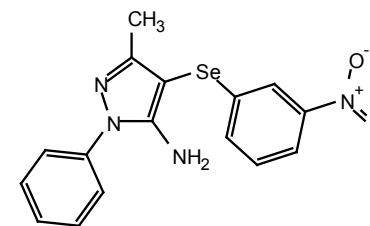

— 83.214

— 13.167

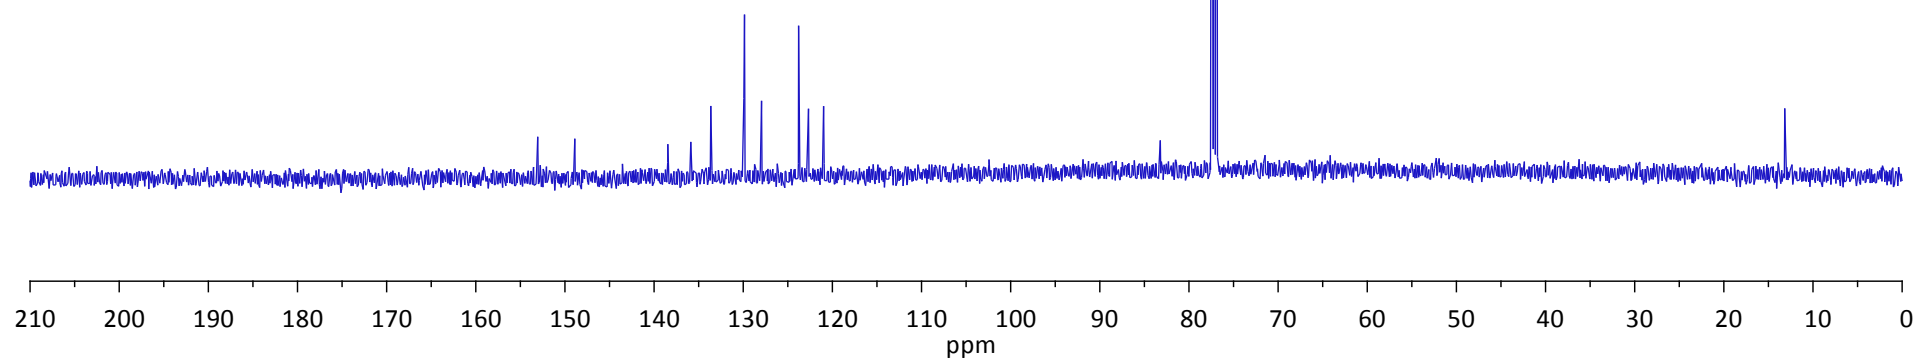

Comment s. mkrtyan =mj-18-ki-f138163-2=A-13C.stan CDCl<sub>3</sub>  
 Number of Scans 512  
 Spectrometer Frequency 125.76  
 Spectral Width 36057.7  
 Spectral Size 65536

Compound 5I

7.593  
7.590  
7.576  
7.574  
7.480  
7.343  
7.261  
7.218  
7.200  
6.801  
6.784

4.232

3.764

s. mkrtyan =mj-16-kii-f7-3=1H.stan CDCl3

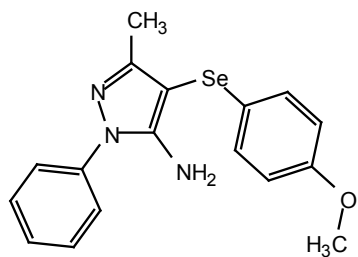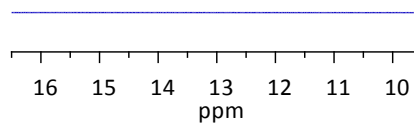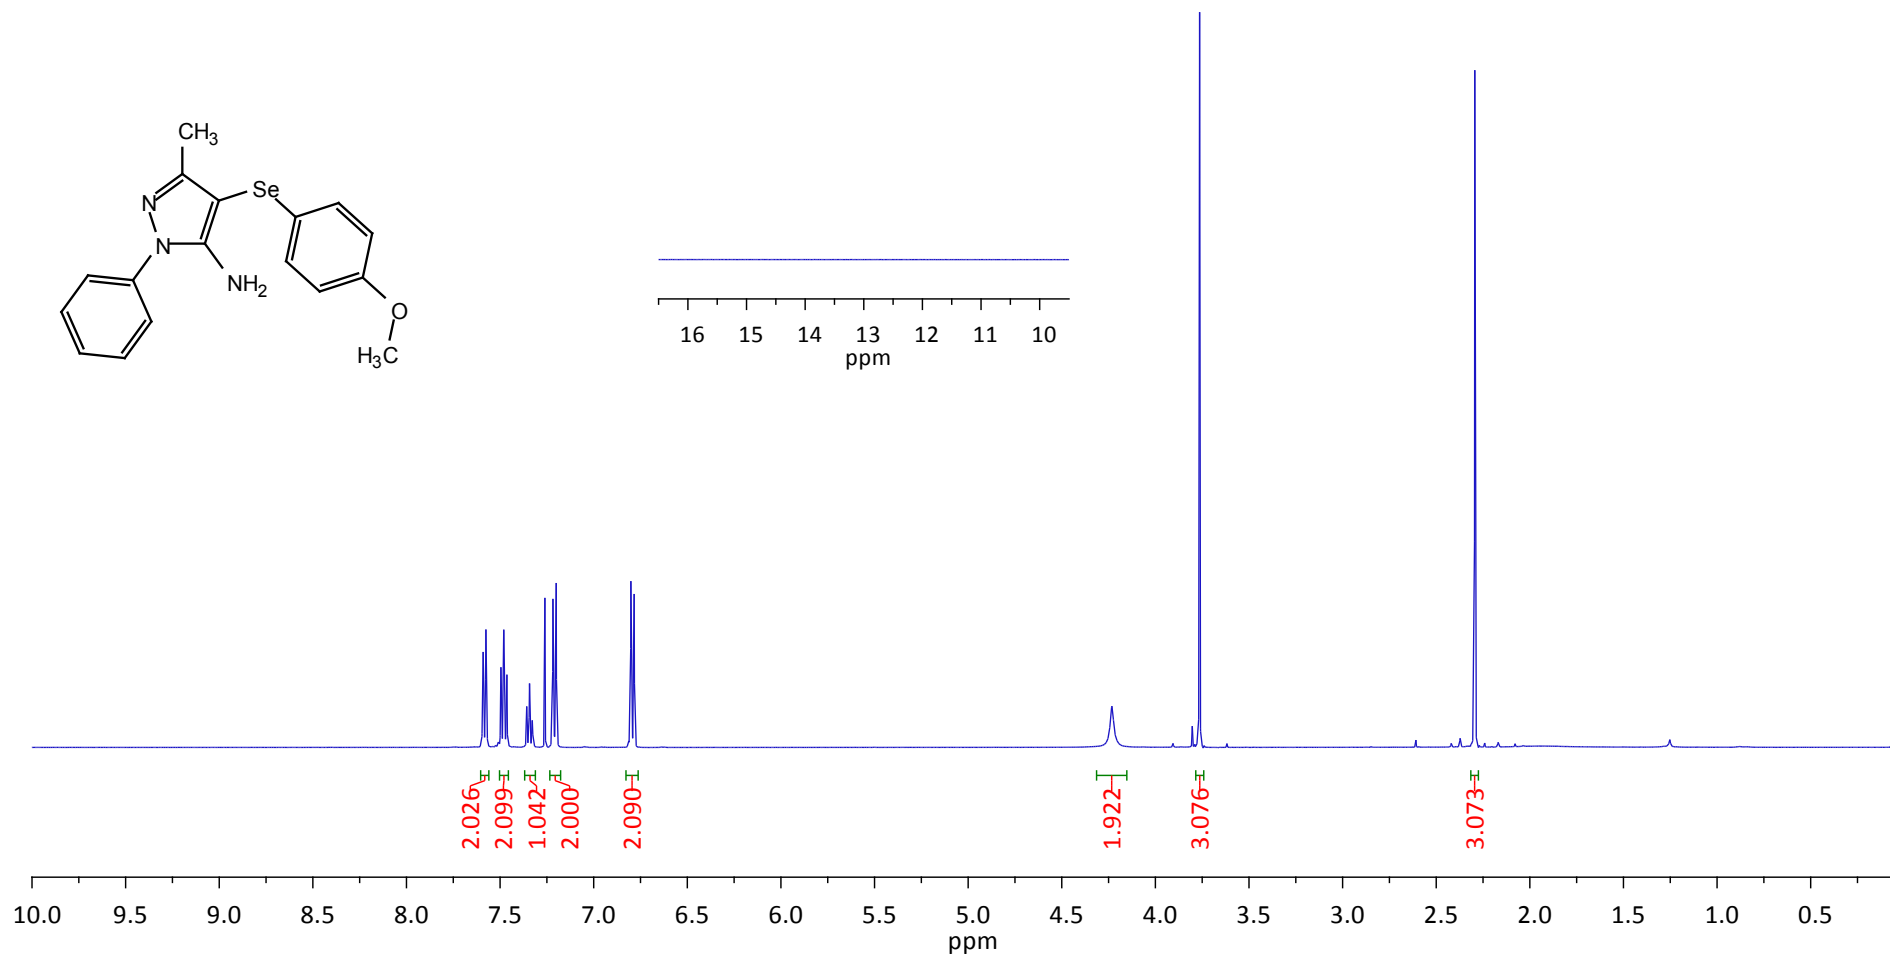

|                        |                                          |
|------------------------|------------------------------------------|
| Comment                | s. mkrtyan =mj-16-kii-f7-3=1H.stan CDCl3 |
| Number of Scans        | 24                                       |
| Spectrometer Frequency | 500.13                                   |
| Spectral Width         | 12336.0                                  |
| Spectral Size          | 65536                                    |

Compound 5I

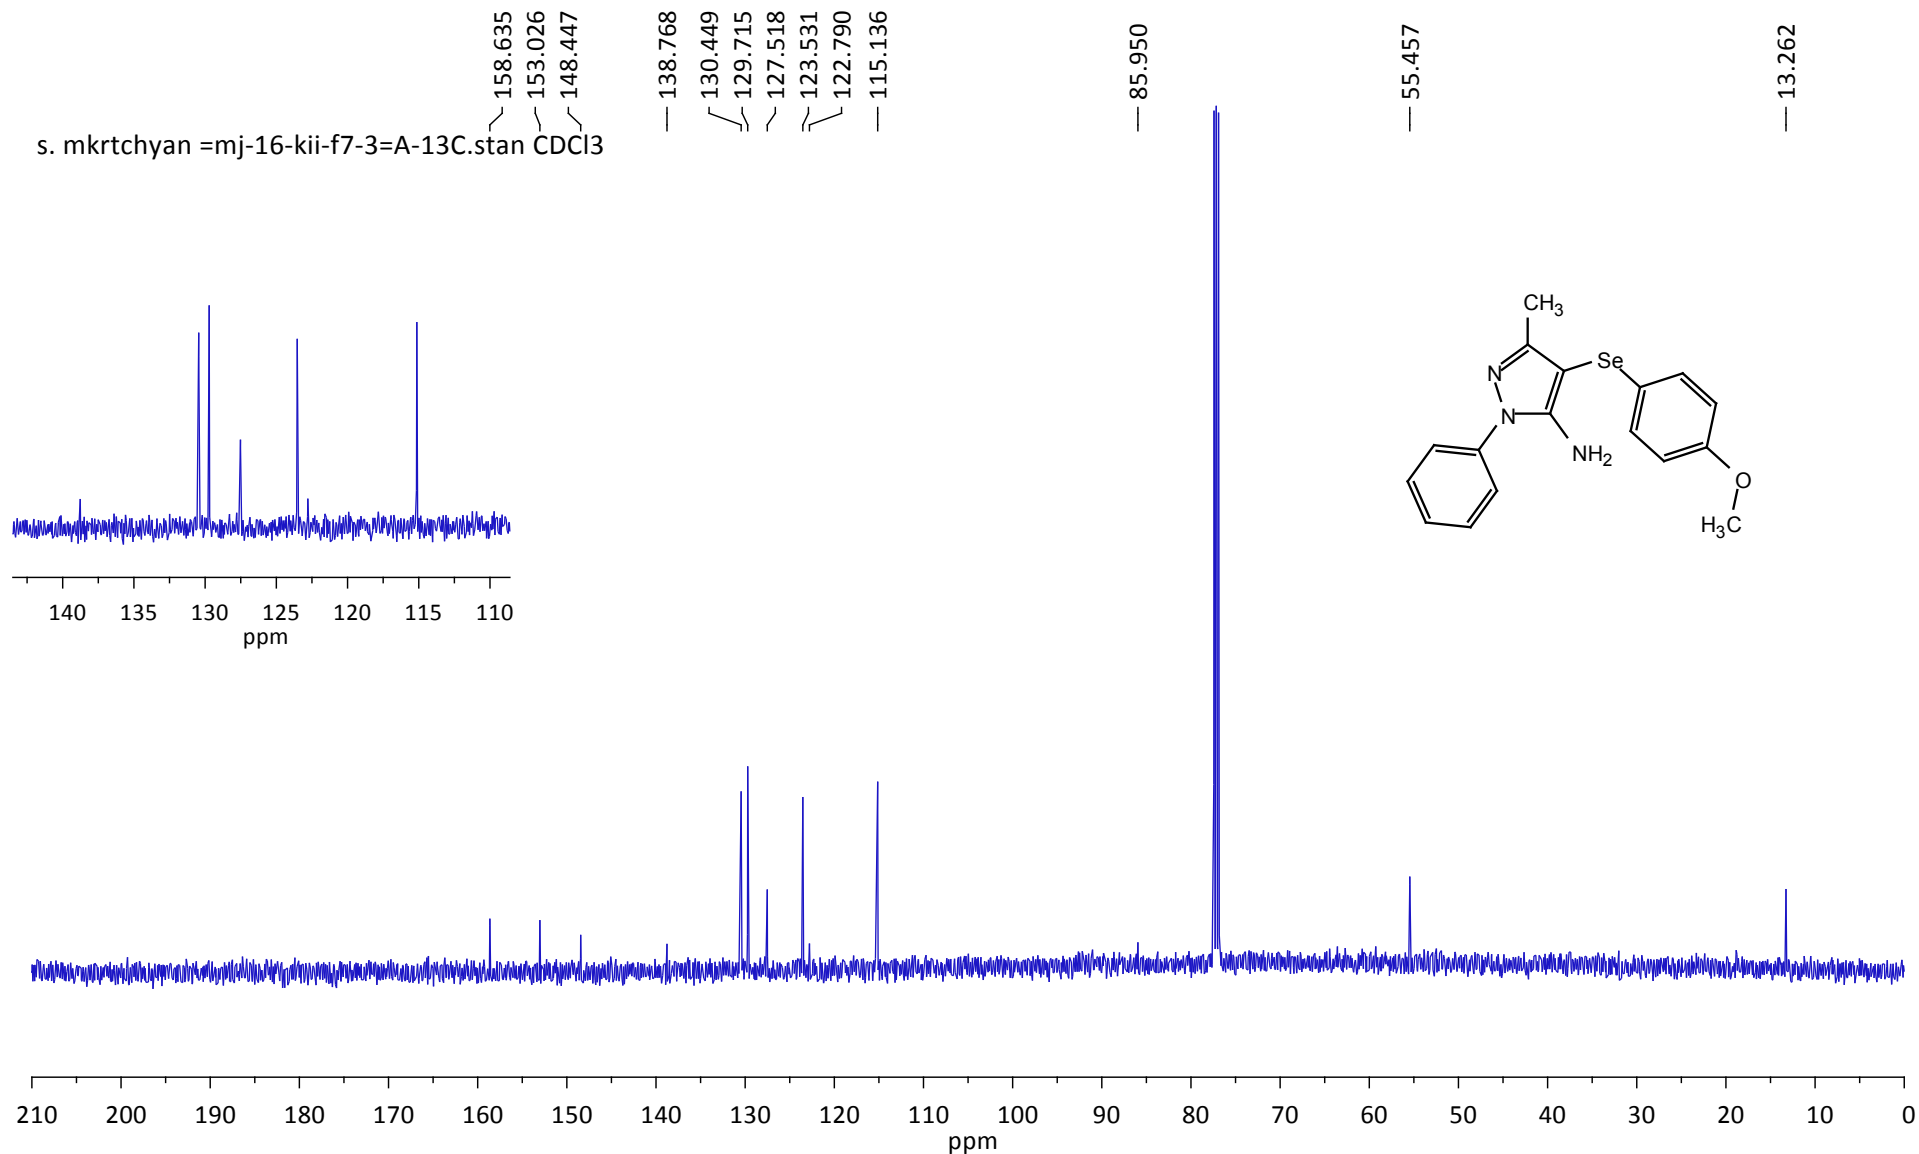

Comment s. mkrtyan =mj-16-kii-f7-3=A-13C.stan CDCl3  
 Number of Scans 512  
 Spectrometer Frequency 125.76  
 Spectral Width 36057.7  
 Spectral Size 65536

Compound 5m

s. mkrtyan =mj-48-5657=  
1H.stan CDCl3

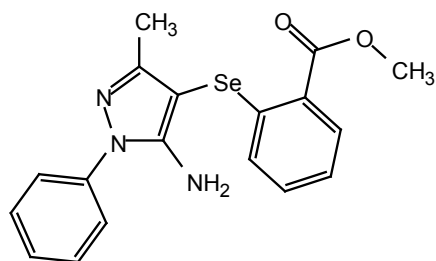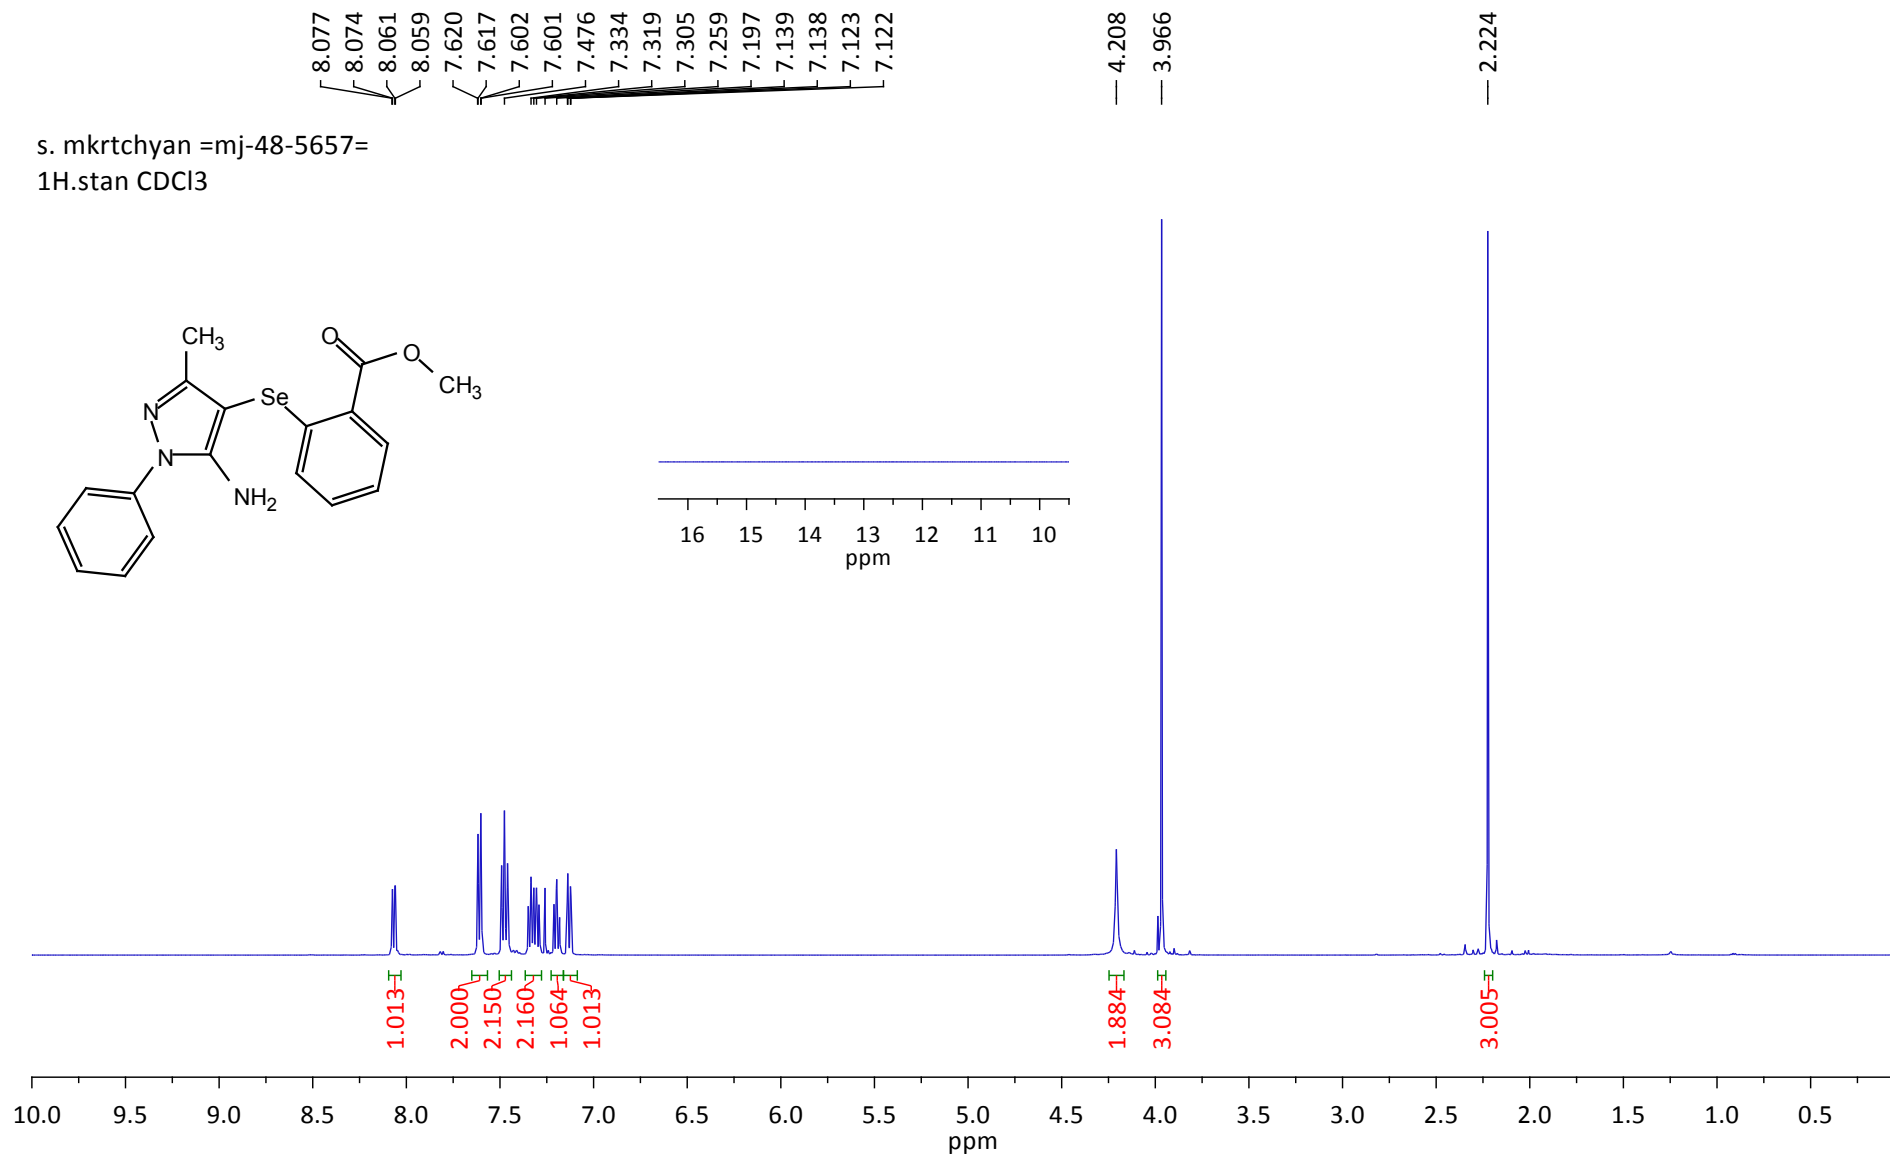

Comment s. mkrtyan =mj-48-5657=  
1H.stan CDCl3

Number of Scans 24

Spectrometer Frequency 500.13

Spectral Width 12335.5

Chemical Shift Range 10.000 - 0.000

Compound 5m

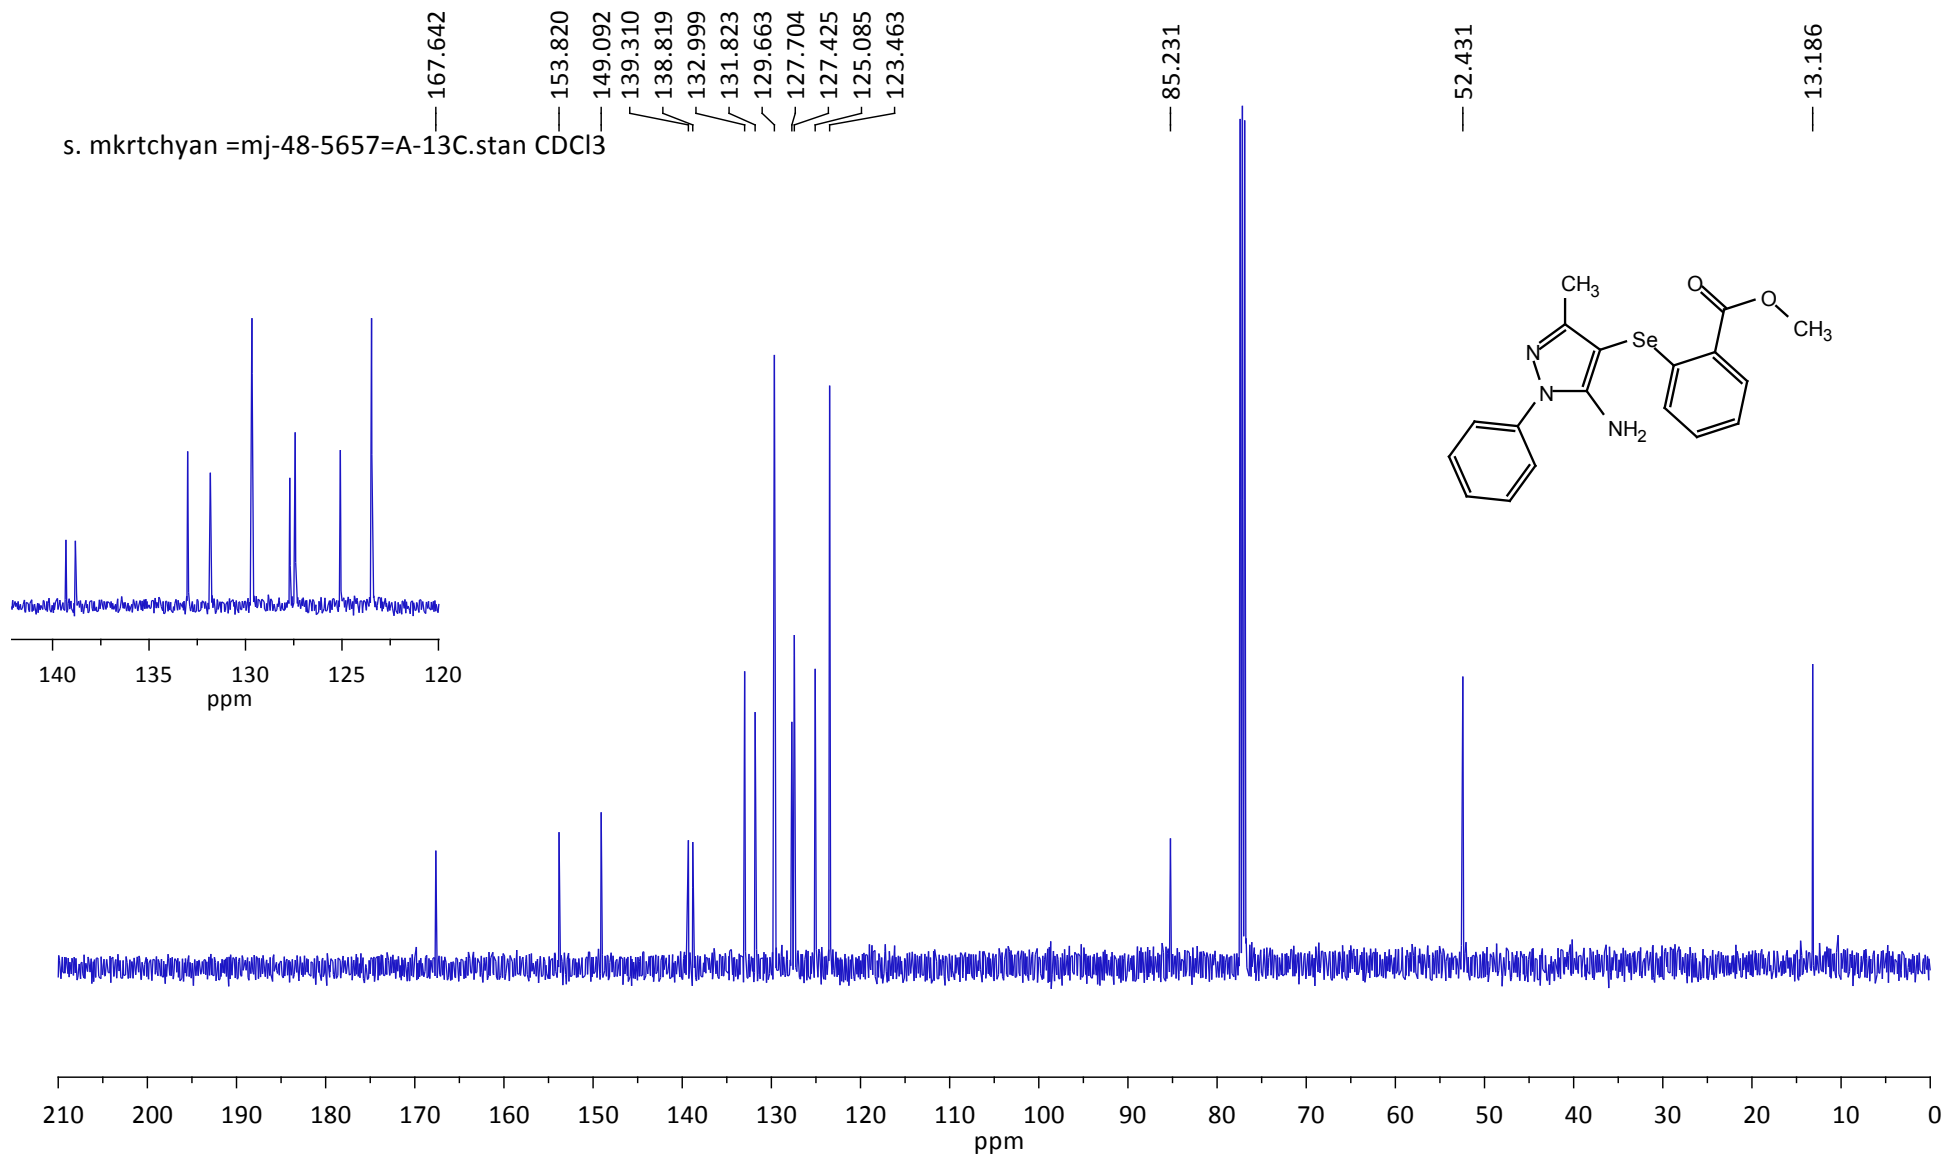

Comment s. mkrtyan =mj-48-5657=A-13C.stan CDCl3  
 Number of Scans 128  
 Spectrometer Frequency 125.76  
 Spectral Width 36057.7  
 Spectral Size 65536

Compound 6

7.552  
7.333  
7.323  
7.315  
7.305  
7.260  
7.126  
7.111  
6.909

5.172

2.335

s. mkrtyan =mj-143-2935=1H.stan CDCl3

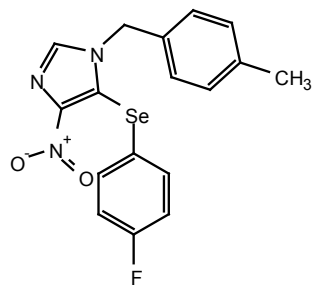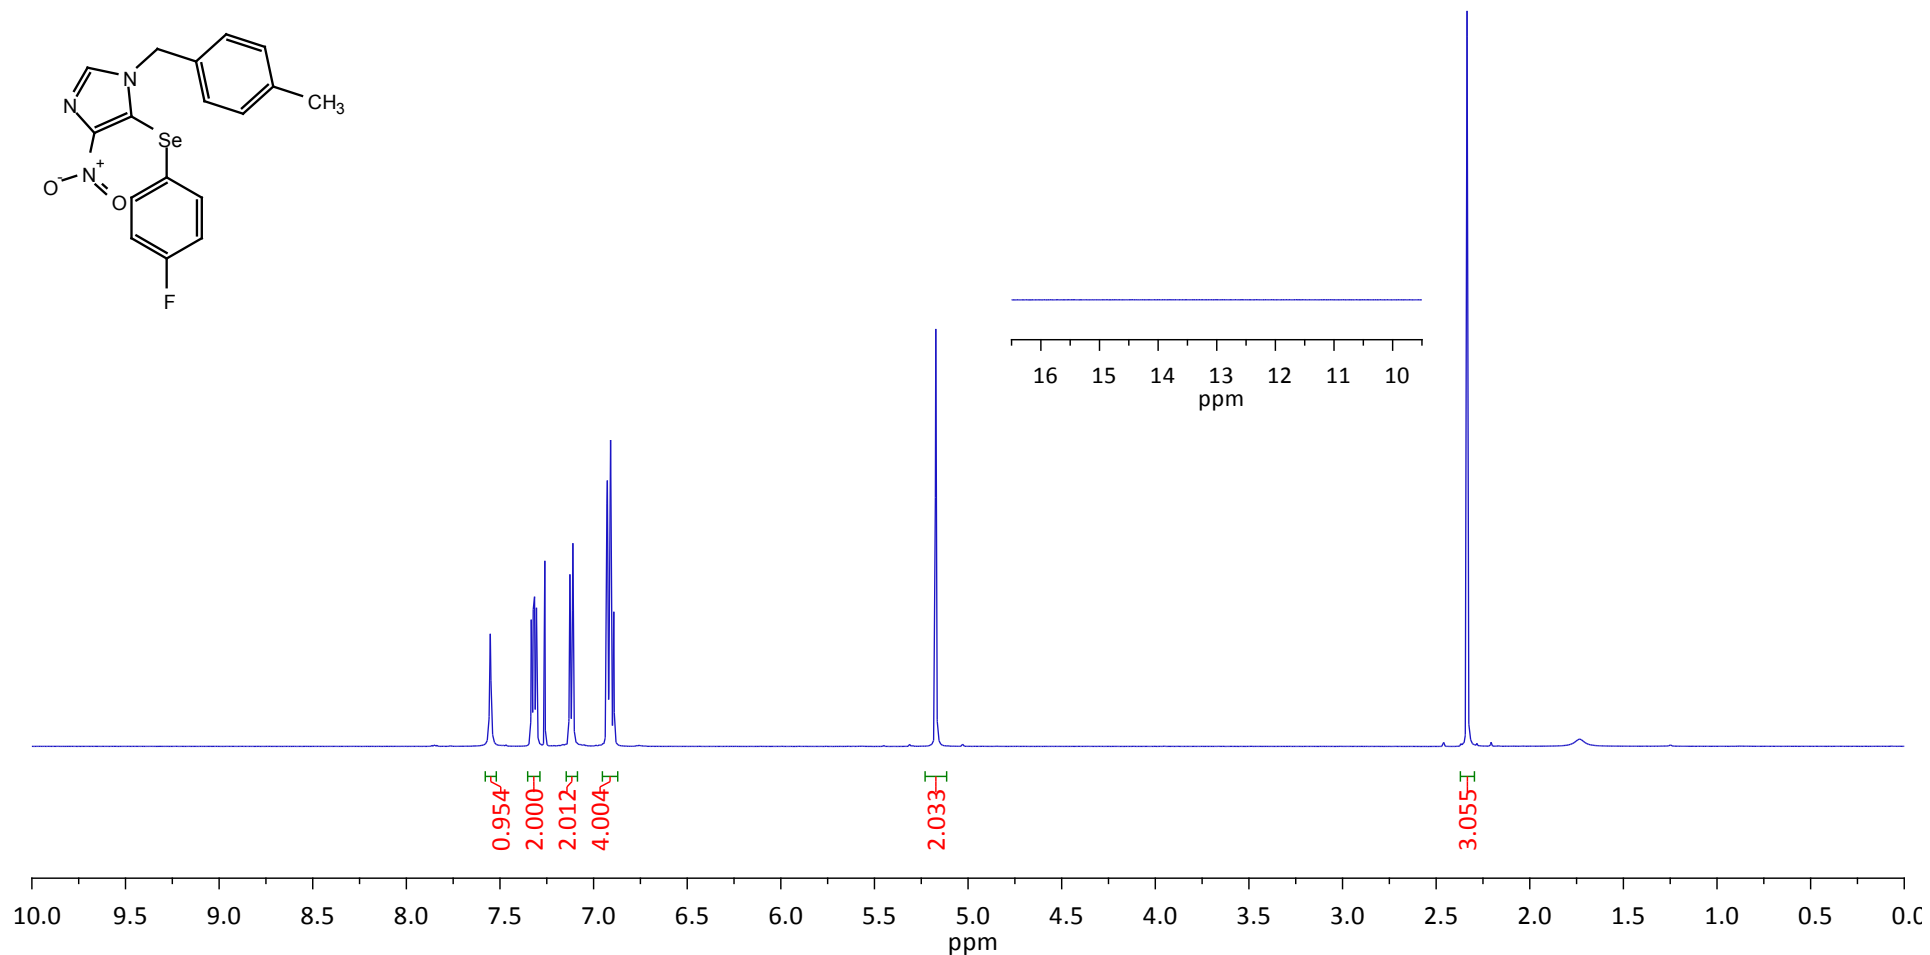

Comment s. mkrtyan =mj-143-2935=1H.stan CDCl3  
 Number of Scans 24  
 Spectrometer Frequency 500.13  
 Spectral Width 12335.5  
 Spectral Size 65536

Compound 6

s. mkrtyan =mj-143-2935=A-13C.stan CDCl3

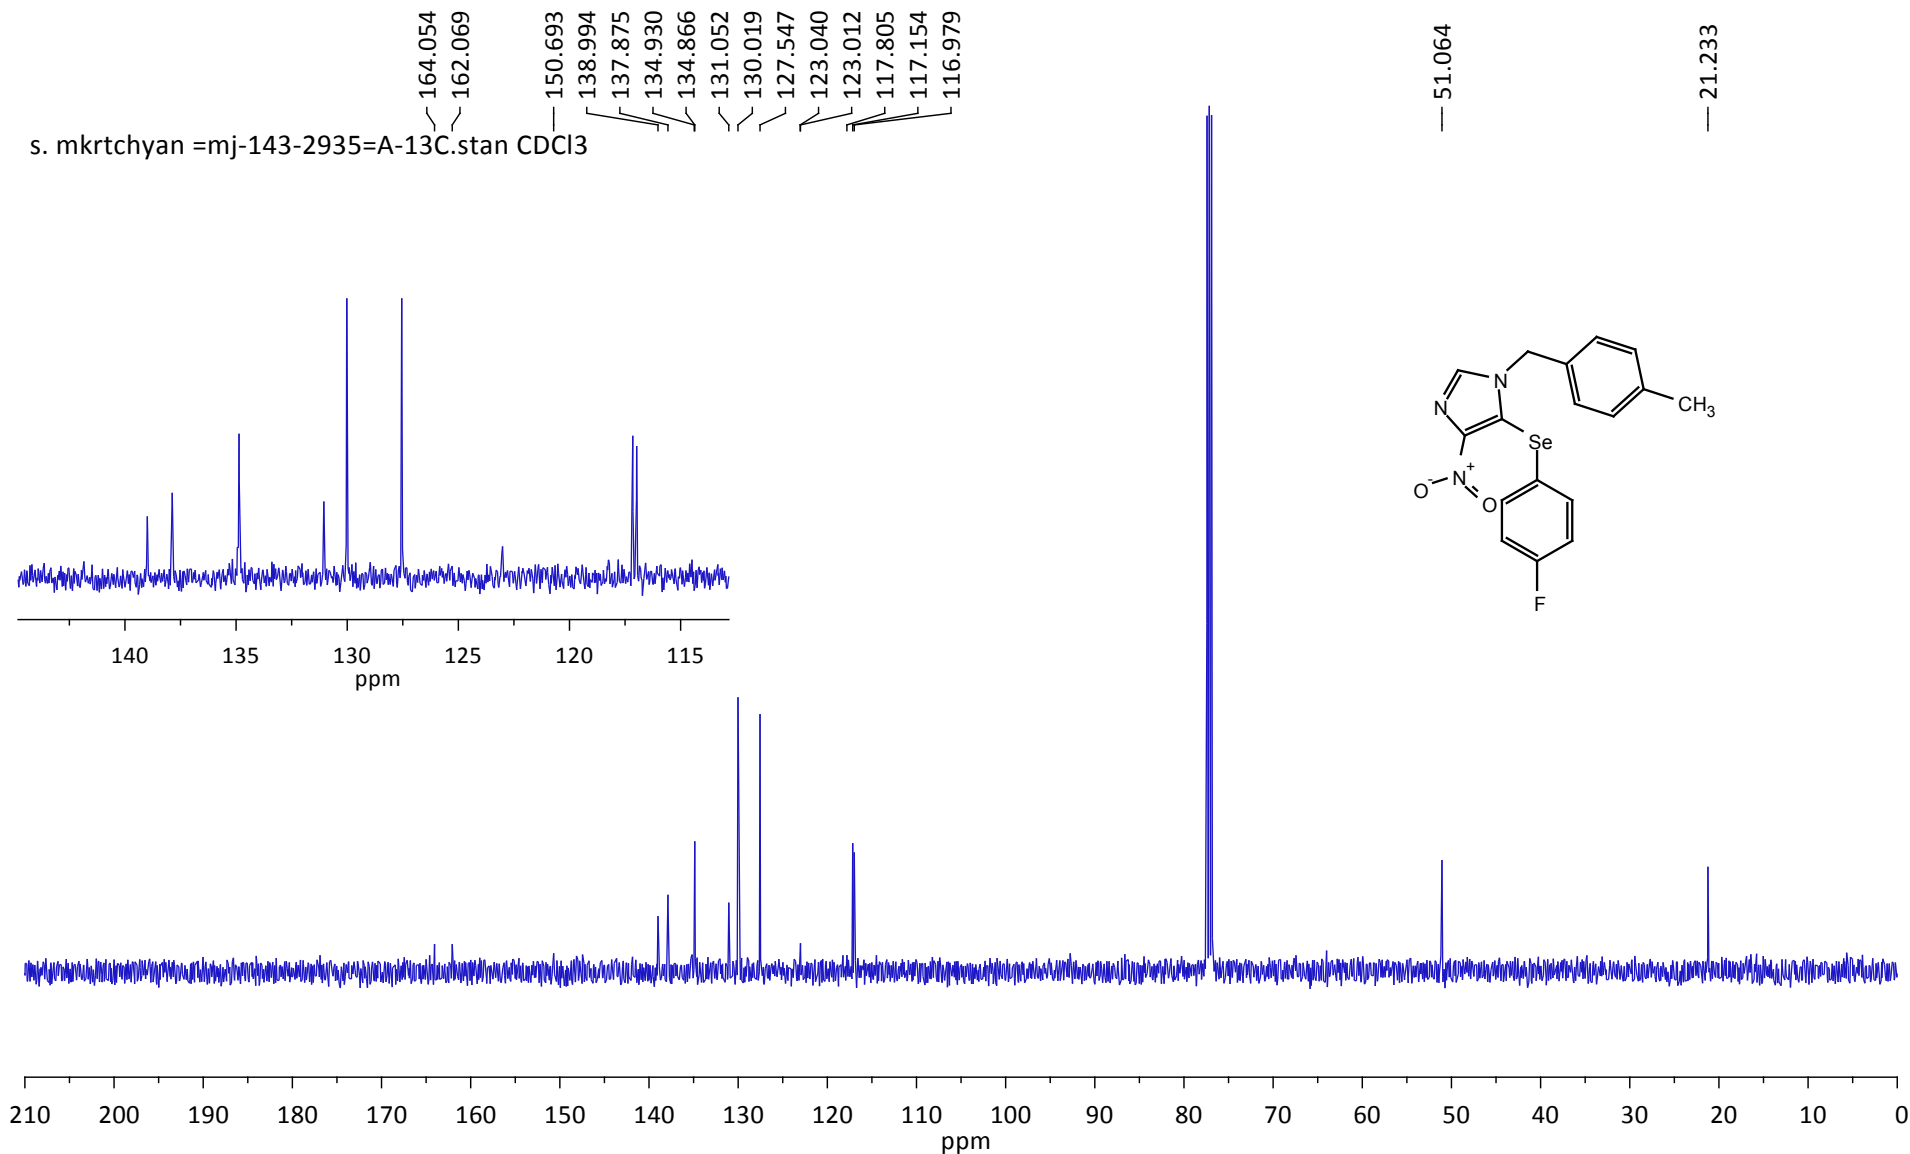

Comment s. mkrtyan =mj-143-2935=A-13C.stan CDCl3  
 Number of Scans 128  
 Spectrometer Frequency 125.76  
 Spectral Width 36057.7  
 Spectral Size 65536



Compound 7a

7.328  
7.312  
7.259  
7.103  
7.087  
6.960  
6.957  
6.945

4.223

2.901

2.311

s. mkrtyan =mj-82=1H.stan CDCl3

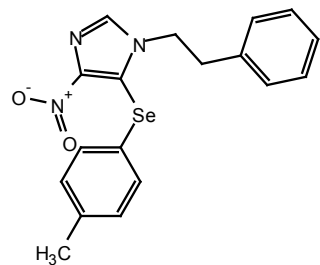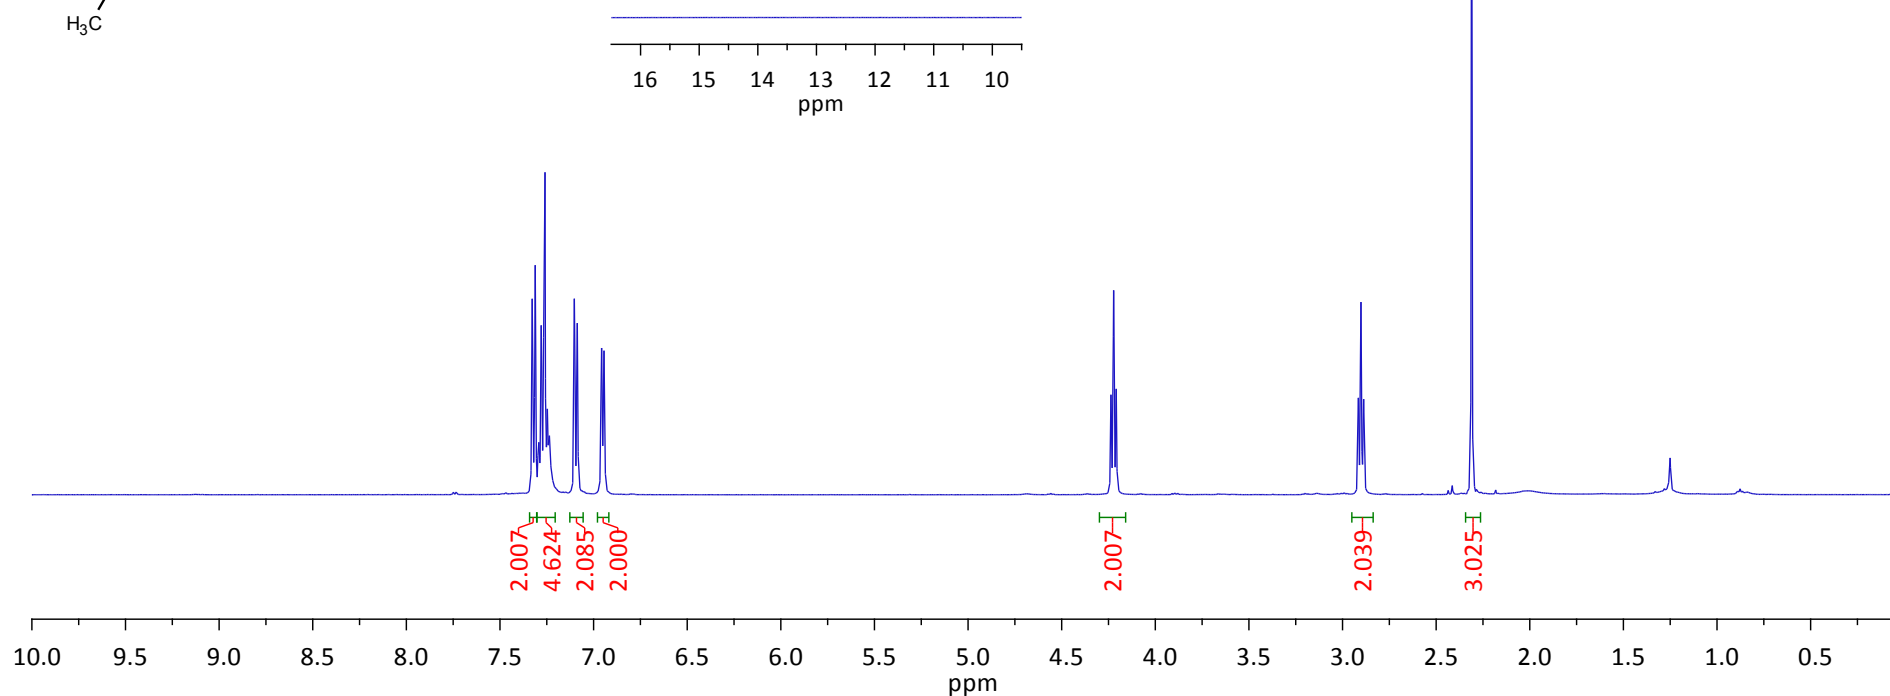

Comment s. mkrtyan =mj-82=1H.stan CDCl3  
 Number of Scans 24  
 Spectrometer Frequency 500.13  
 Spectral Width 12335.5  
 Spectral Size 65536

Compound 7a

s. mkrtchyan =mj-82=A-13C.stan CDCl3

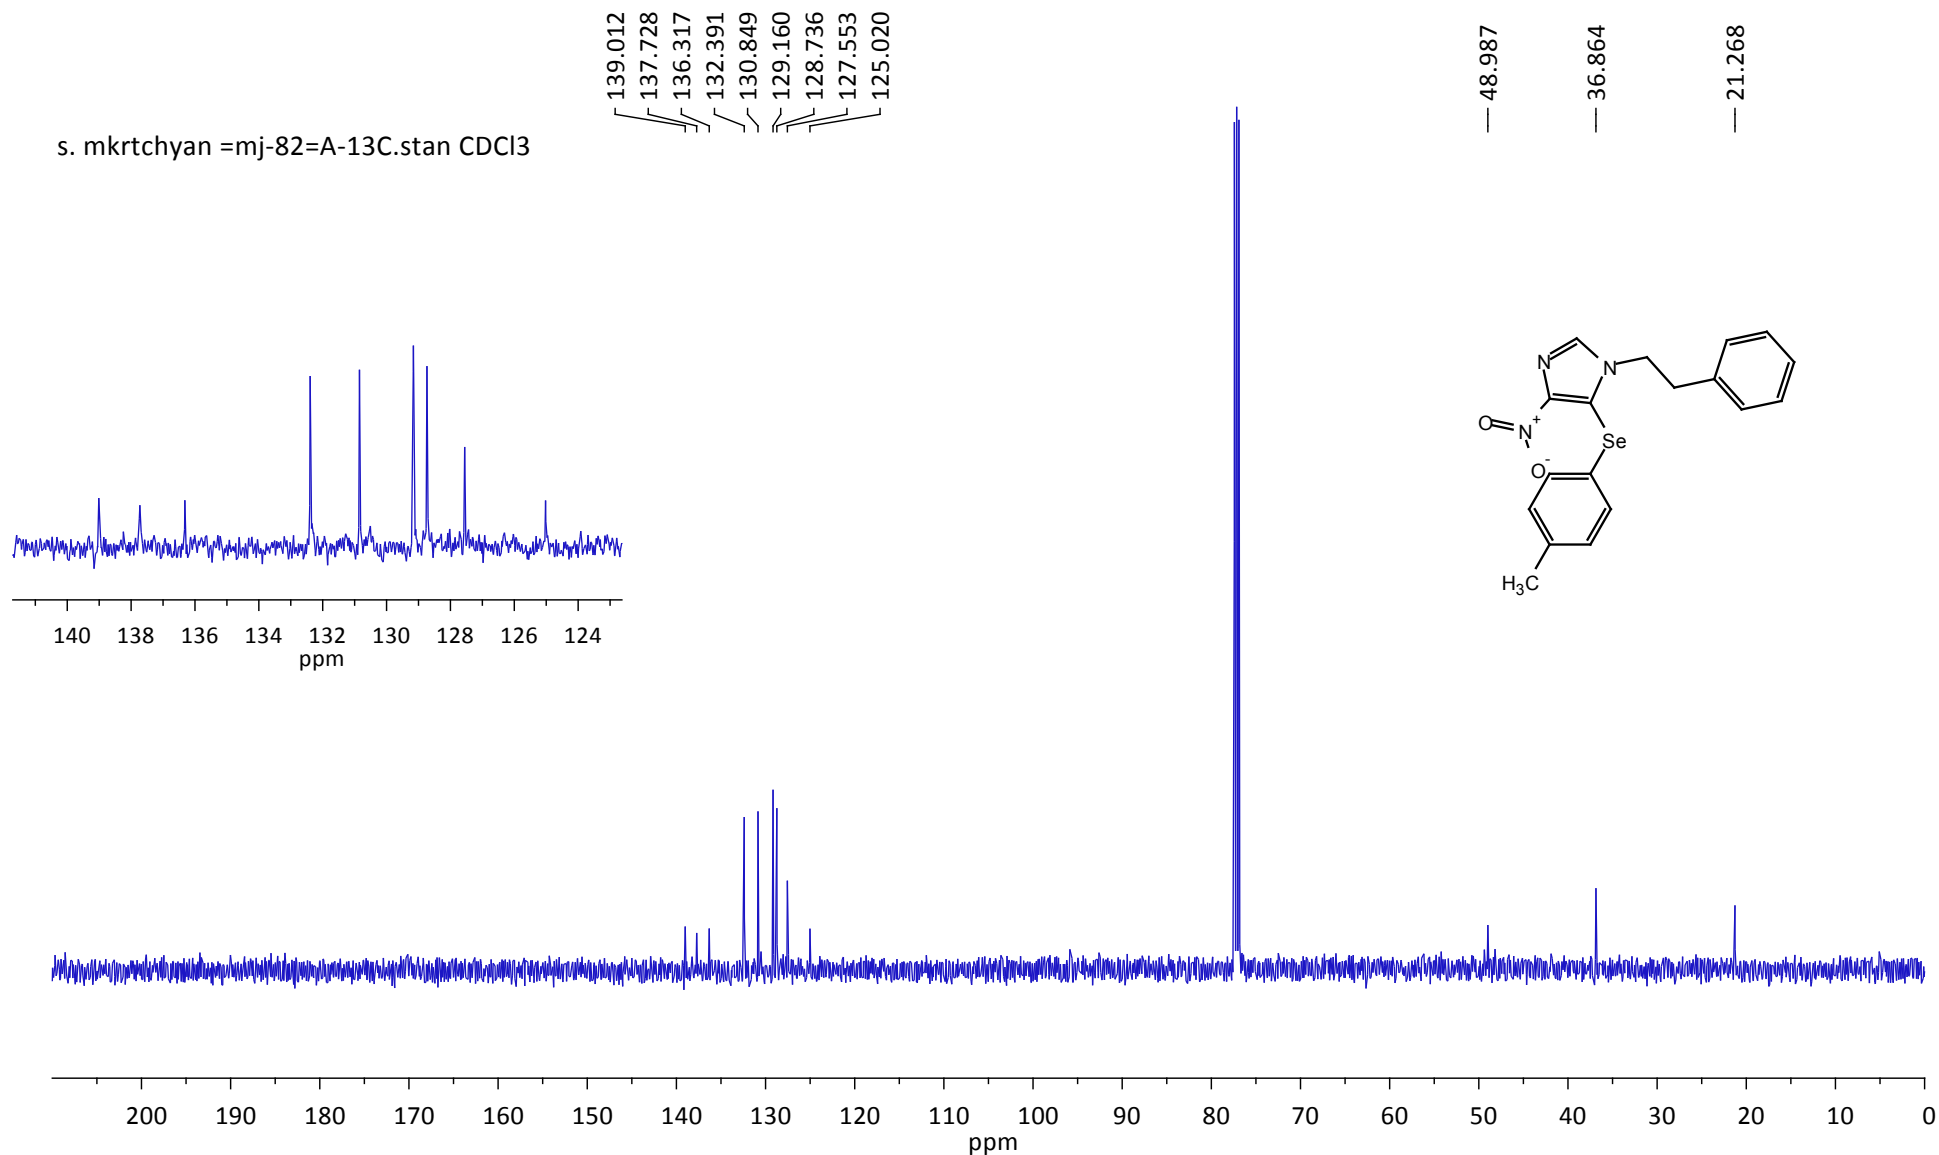

|                        |                                      |
|------------------------|--------------------------------------|
| Comment                | s. mkrtchyan =mj-82=A-13C.stan CDCl3 |
| Number of Scans        | 128                                  |
| Spectrometer Frequency | 125.76                               |
| Spectral Width         | 36057.7                              |
| Spectral Size          | 65536                                |

Compound **7b**

7.334  
7.287  
7.272  
7.070  
7.054  
7.002  
6.989

4.369

2.974

s. mkrtyan =mj-62-3041=1H.stan CDCl3

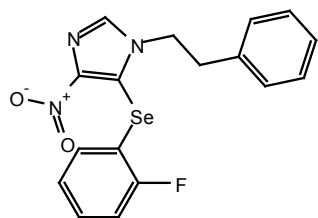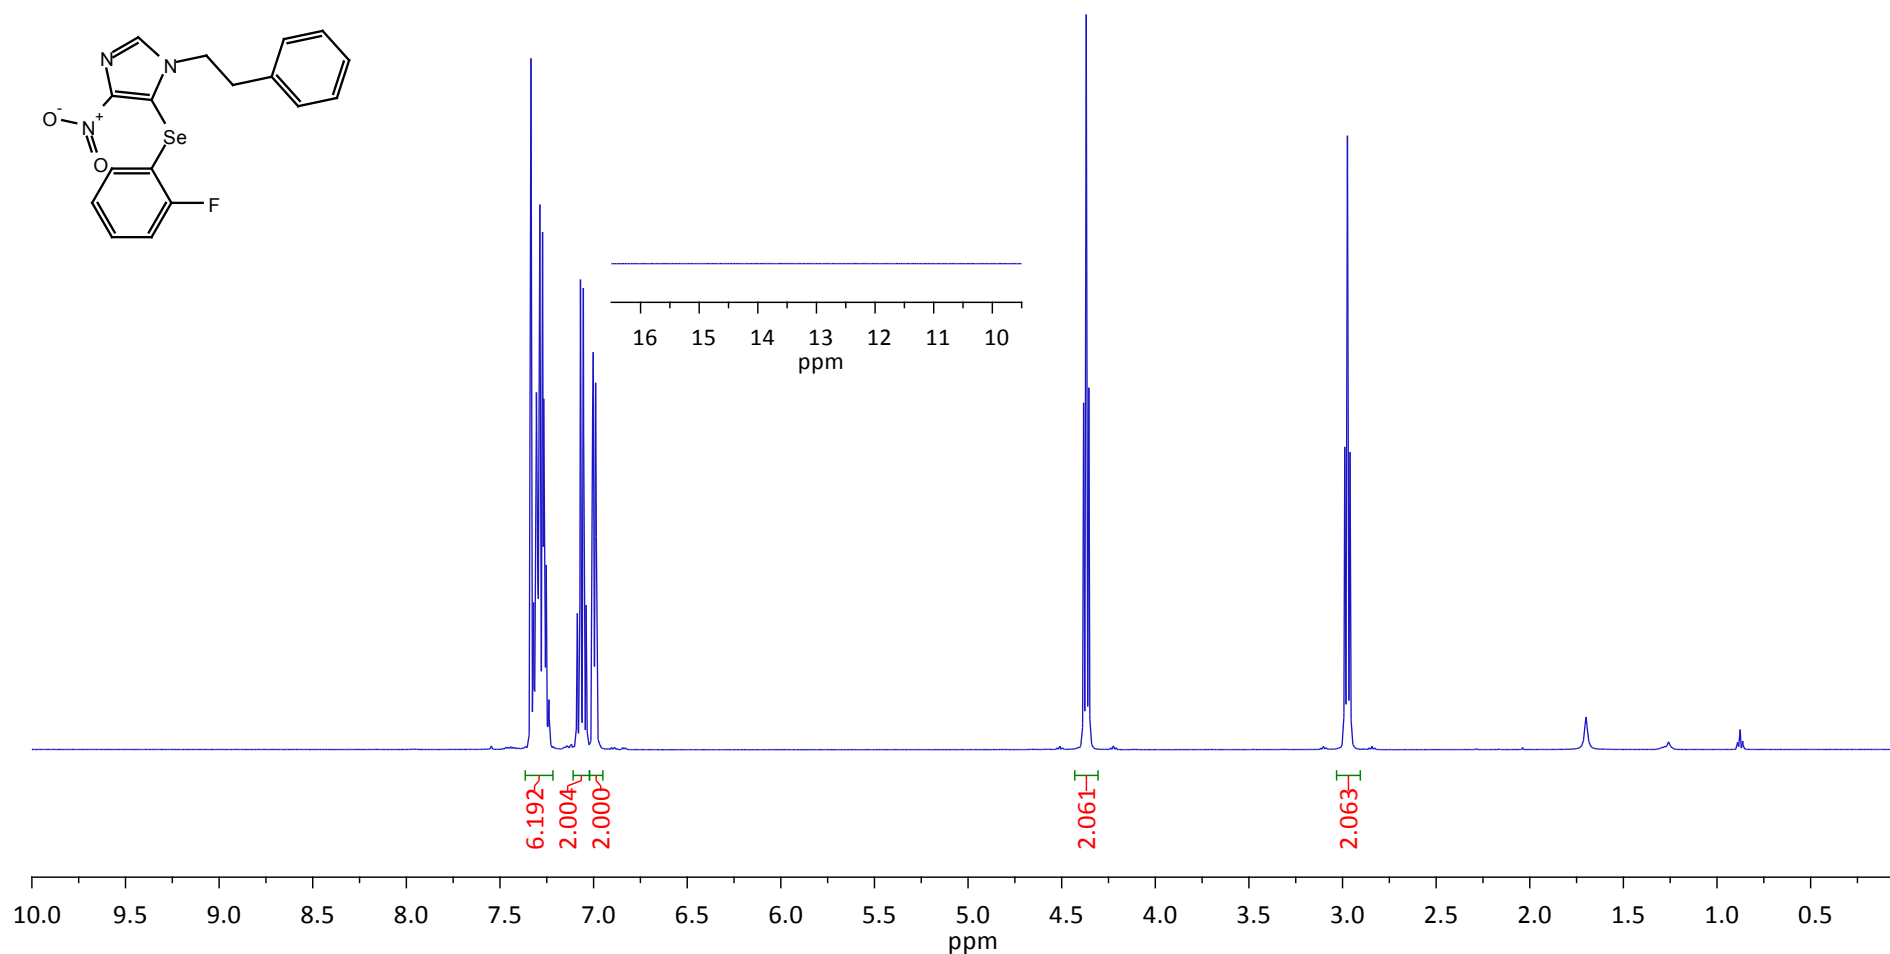

Comment s. mkrtyan =mj-62-3041=1H.stan CDCl3  
Number of Scans 24  
Spectrometer Frequency 500.13  
Spectral Width 12335.5  
Spectral Size 65536

Compound **7b**

s. mkrtyan =mj-62-3041=A-13C.stan CDCl<sub>3</sub>

162.019  
160.074  
150.964  
137.793  
136.205  
133.891  
129.179  
128.774  
127.599  
125.575  
116.261  
116.080  
115.721  
115.551

48.985  
37.279

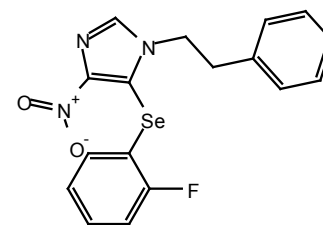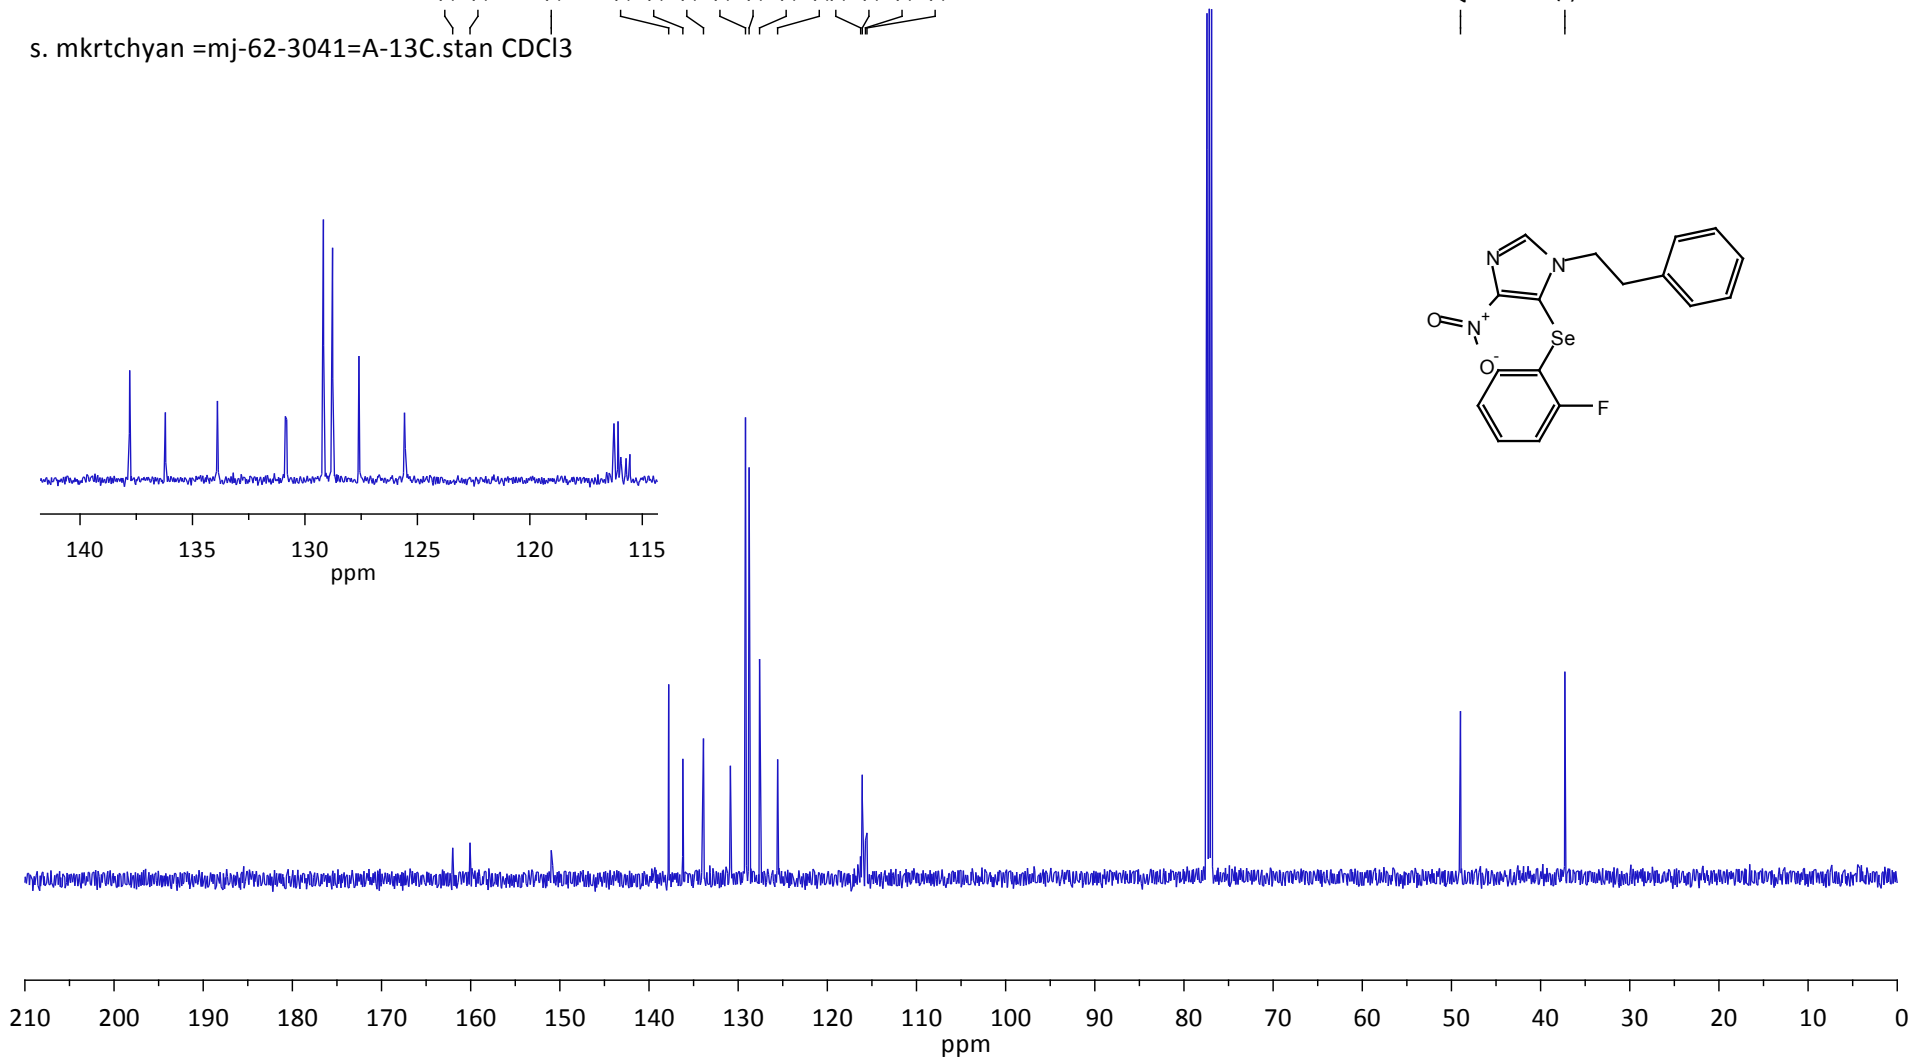

Comment s. mkrtyan =mj-62-3041=A-13C.stan CDCl<sub>3</sub>  
 Number of Scans 256  
 Spectrometer Frequency 125.76  
 Spectral Width 36057.7  
 Spectral Size 65536

Compound 7c

7.345  
7.254  
7.109  
7.093  
7.026  
7.010  
6.964

4.292

2.936

s. mkrtyan =mj-115-4551=1H.stan CDCl3

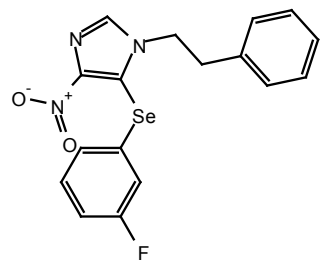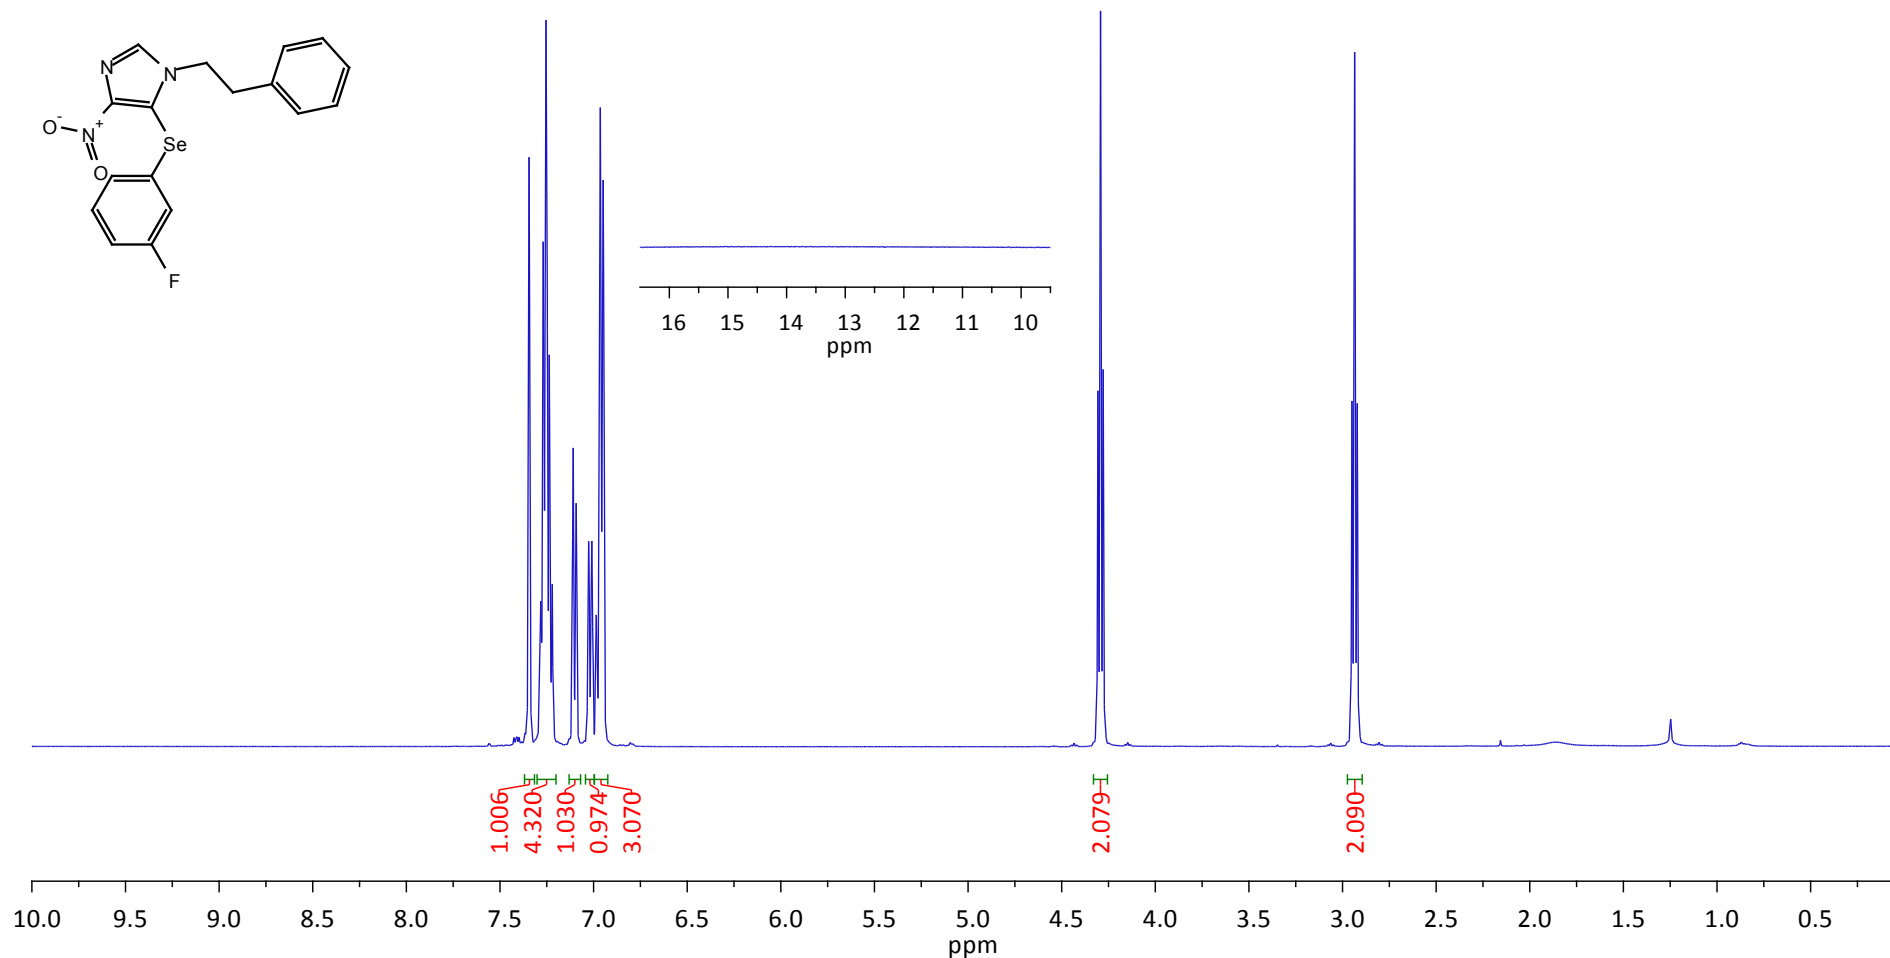

Comment s. mkrtyan =mj-115-4551=1H.stan CDCl3  
Number of Scans 24  
Spectrometer Frequency 500.13  
Spectral Width 12335.5  
Spectral Size 65536

Compound 7c

s. mkrtyan =mj-115-4551=A-13C.stan CDCl3

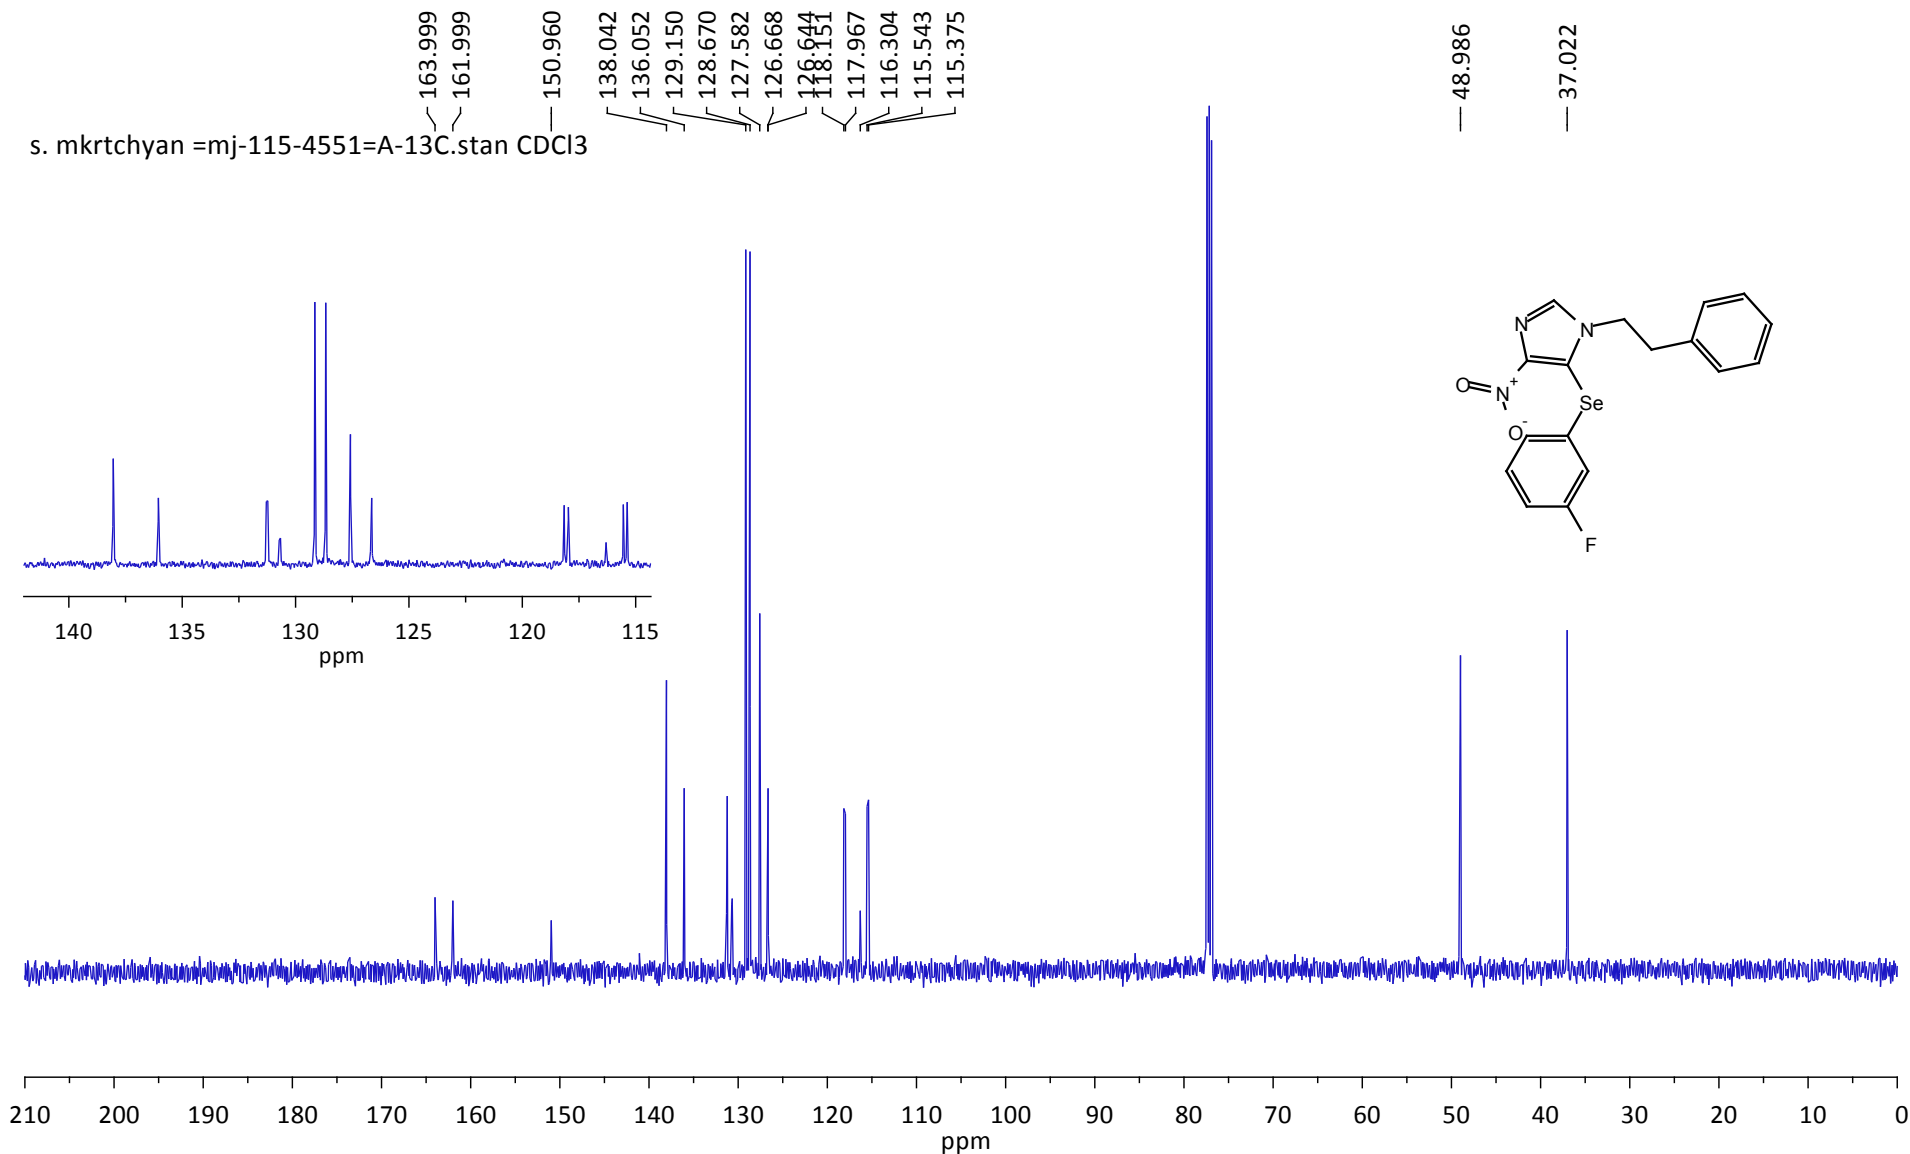

Comment s. mkrtyan =mj-115-4551=A-13C.stan CDCl3  
 Number of Scans 164  
 Spectrometer Frequency 125.76  
 Spectral Width 36057.7  
 Spectral Size 65536

Compound 7d

7.428  
7.417  
7.410  
7.400  
7.290  
7.261  
7.259  
6.978  
6.966

4.291

2.938

s. mkrtyan =mj63-512=1H.stan CDCl3

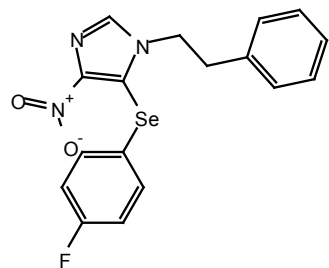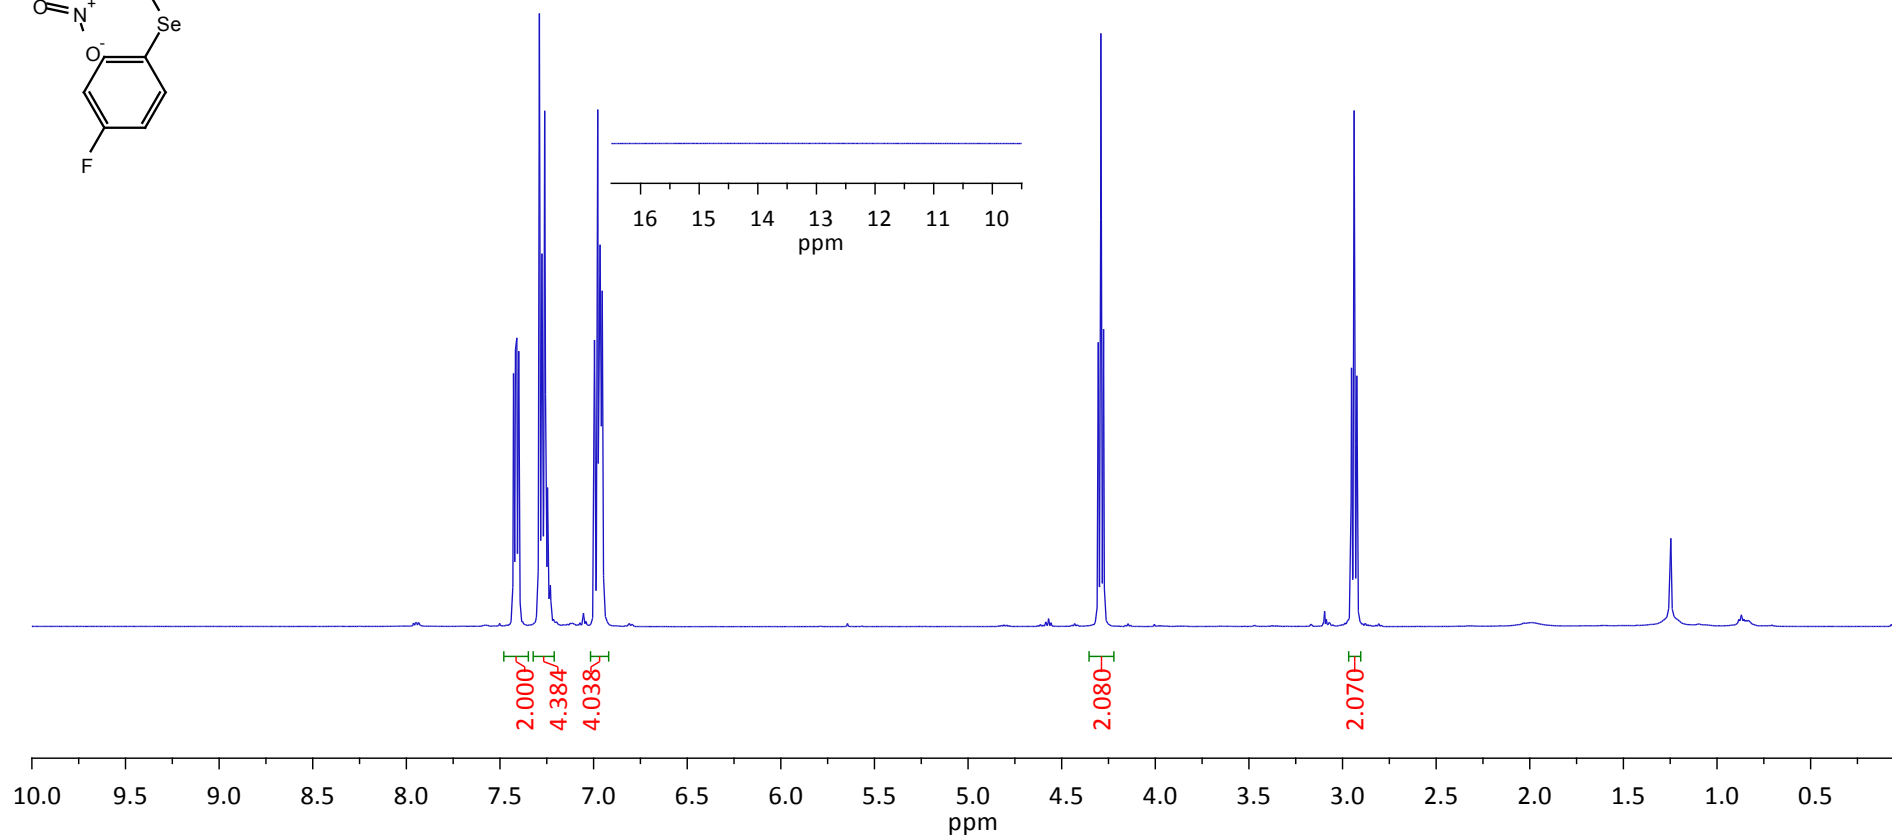

Comment s. mkrtyan =mj63-512=1H.stan CDCl3  
Number of Scans 24  
Spectrometer Frequency 500.13  
Spectral Width 12335.5  
Spectral Size 65536

Compound 7d

s. mkrtyan =mj63-512=A-13C.stan CDCl3

— 48.899  
— 36.989

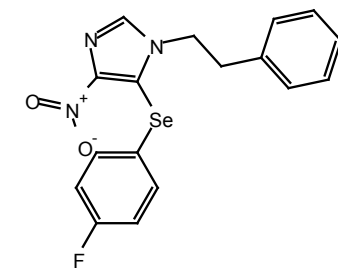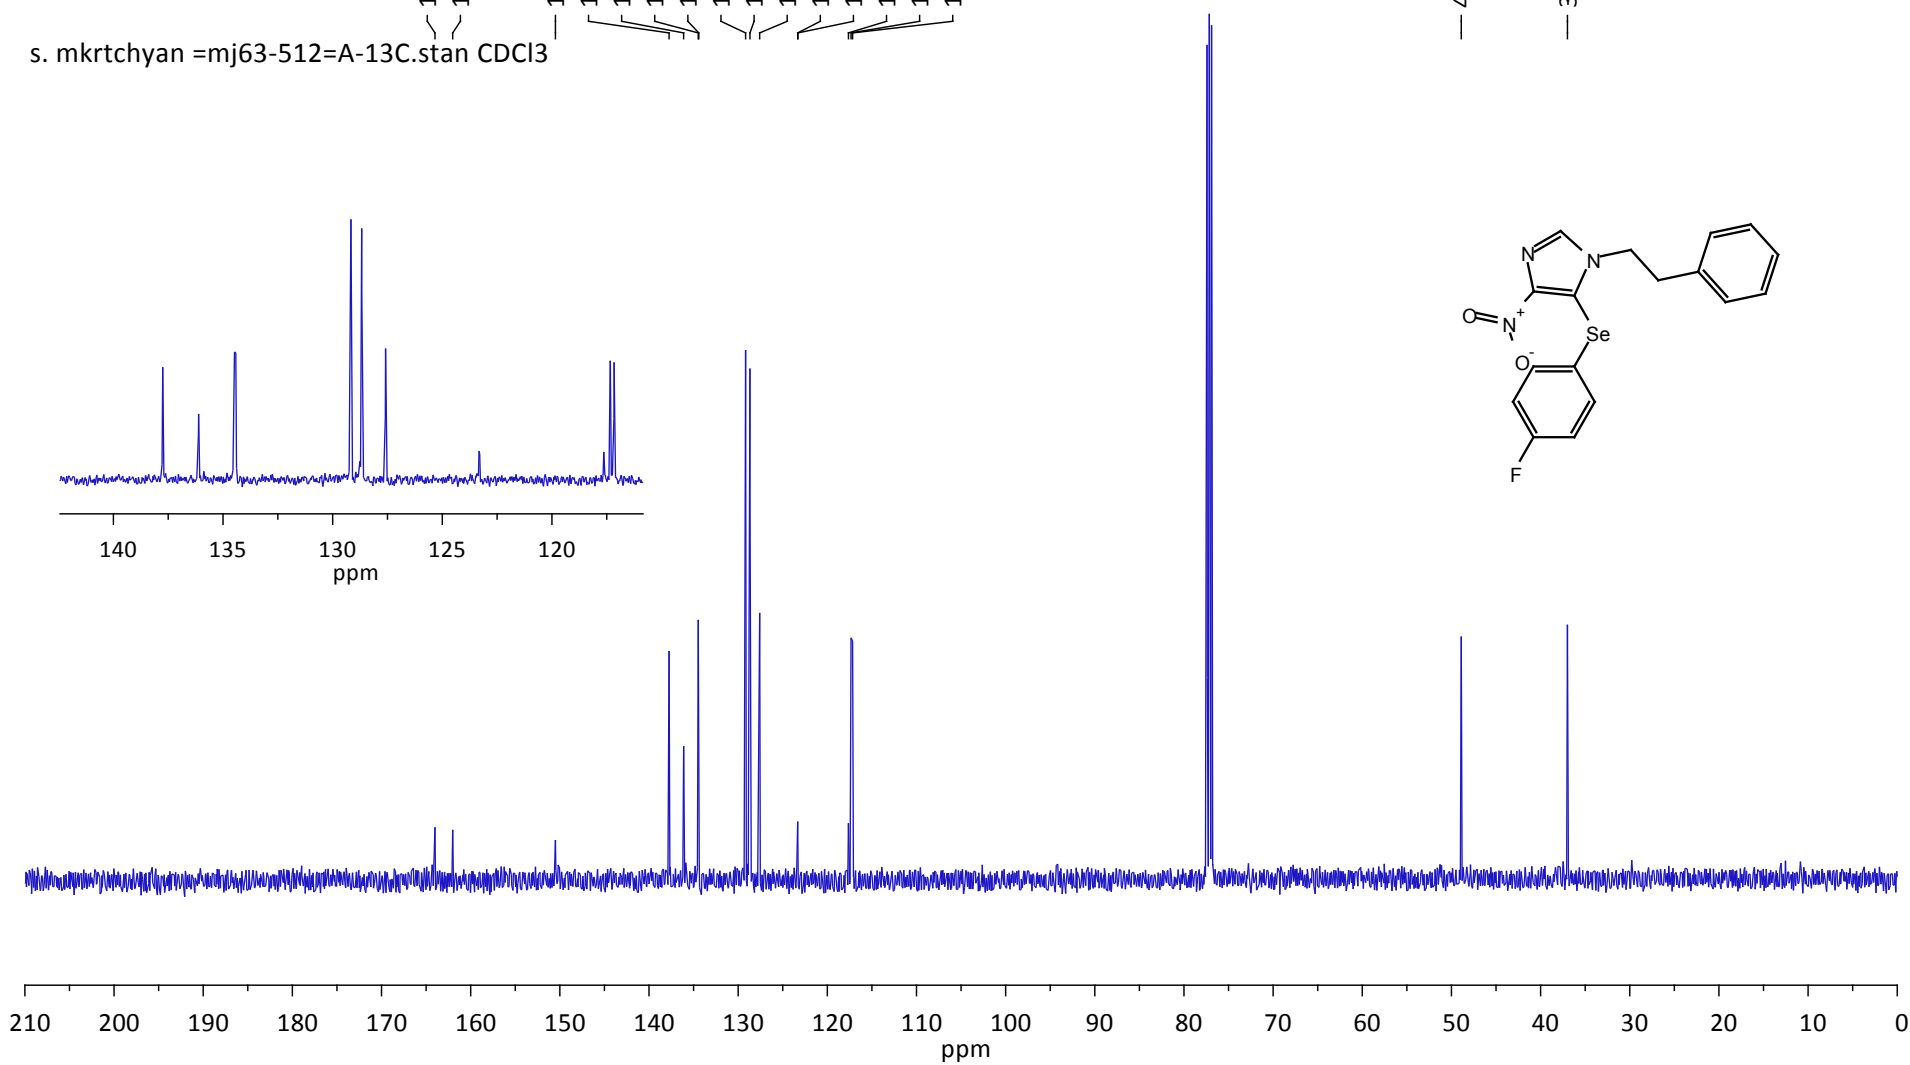

Comment s. mkrtyan =mj63-512=A-13C.stan CDCl3  
 Number of Scans 128  
 Spectrometer Frequency 125.76  
 Spectral Width 36057.7  
 Spectral Size 65536



Compound 8

s. mkrtyan =mj-148-213=1H.stan CDCl3

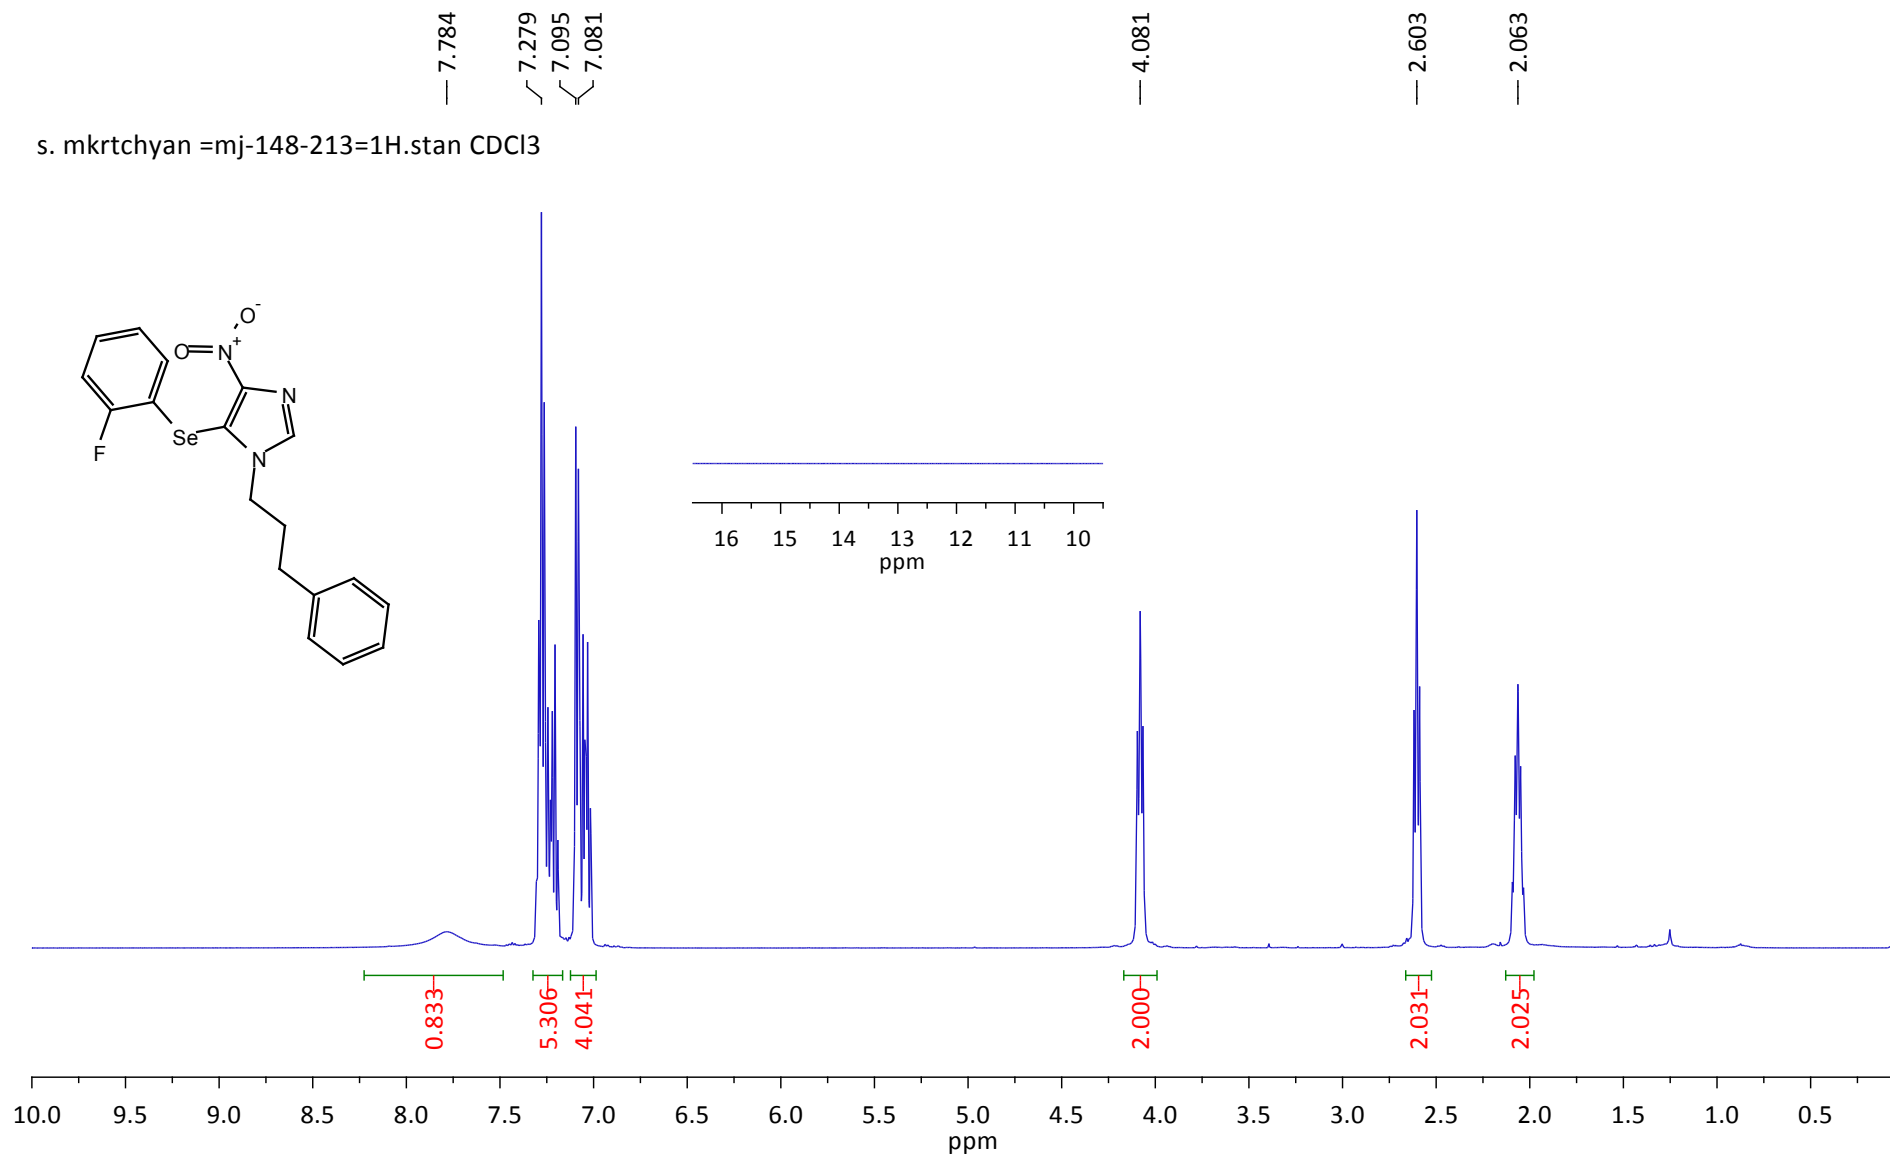

Comment s. mkrtyan =mj-148-213=1H.stan CDCl3  
Number of Scans 16  
Spectrometer Frequency 500.13  
Spectral Width 12335.5  
Spectral Size 65536

Compound 8

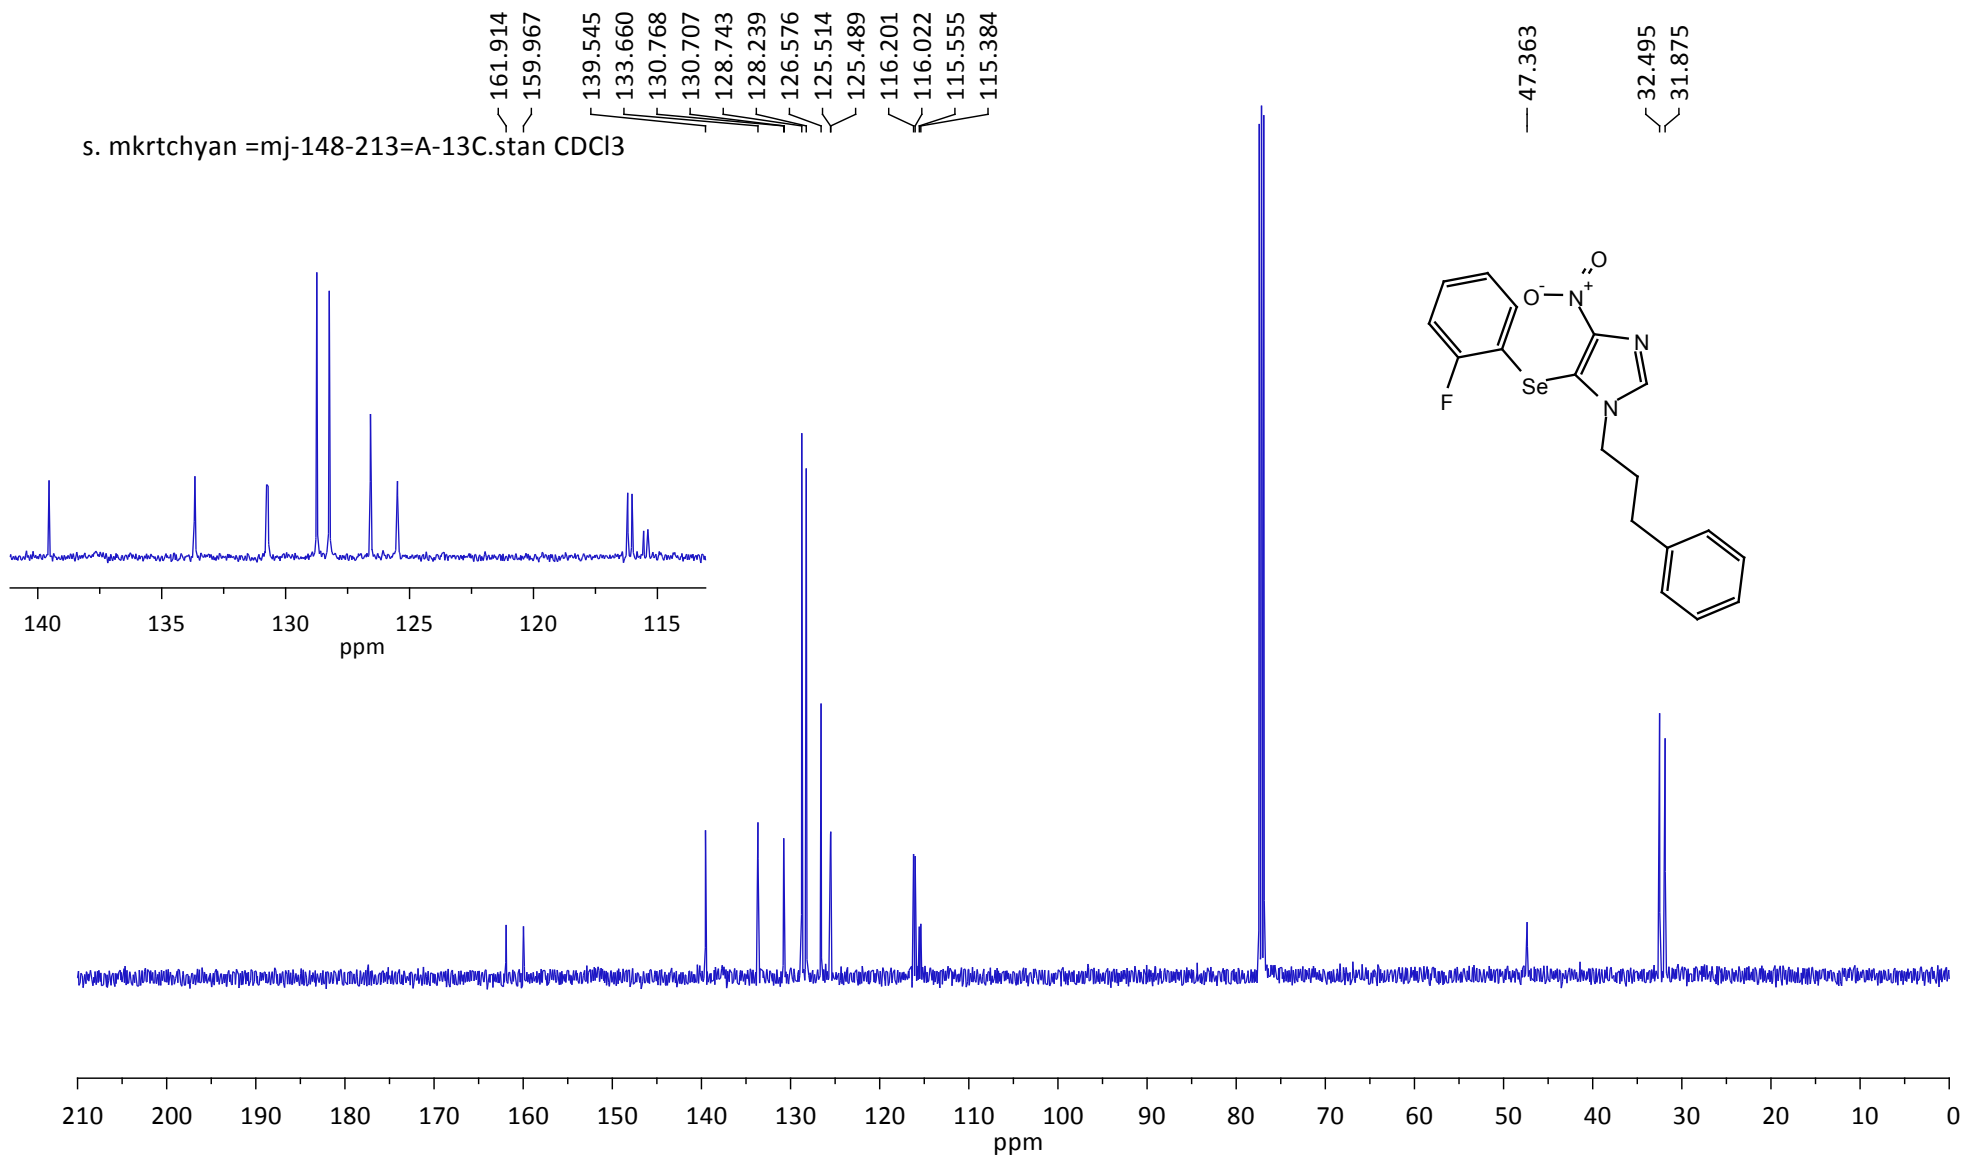

Comment s. mkrtyan =mj-148-213=A-13C.stan CDCl3  
 Number of Scans 148  
 Spectrometer Frequency 125.76  
 Spectral Width 36057.7  
 Spectral Size 65536

Compound 9a

7.295  
7.281  
7.260  
7.060  
7.045  
7.005  
7.001  
6.990

— 4.314

— 2.927

— 2.212

s. mkrtyan =mj107-714=1H.stan CDCl3

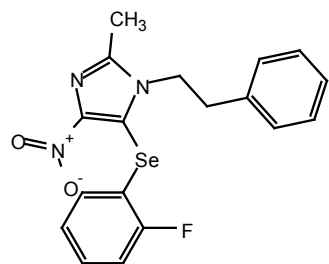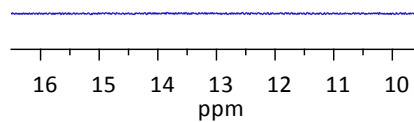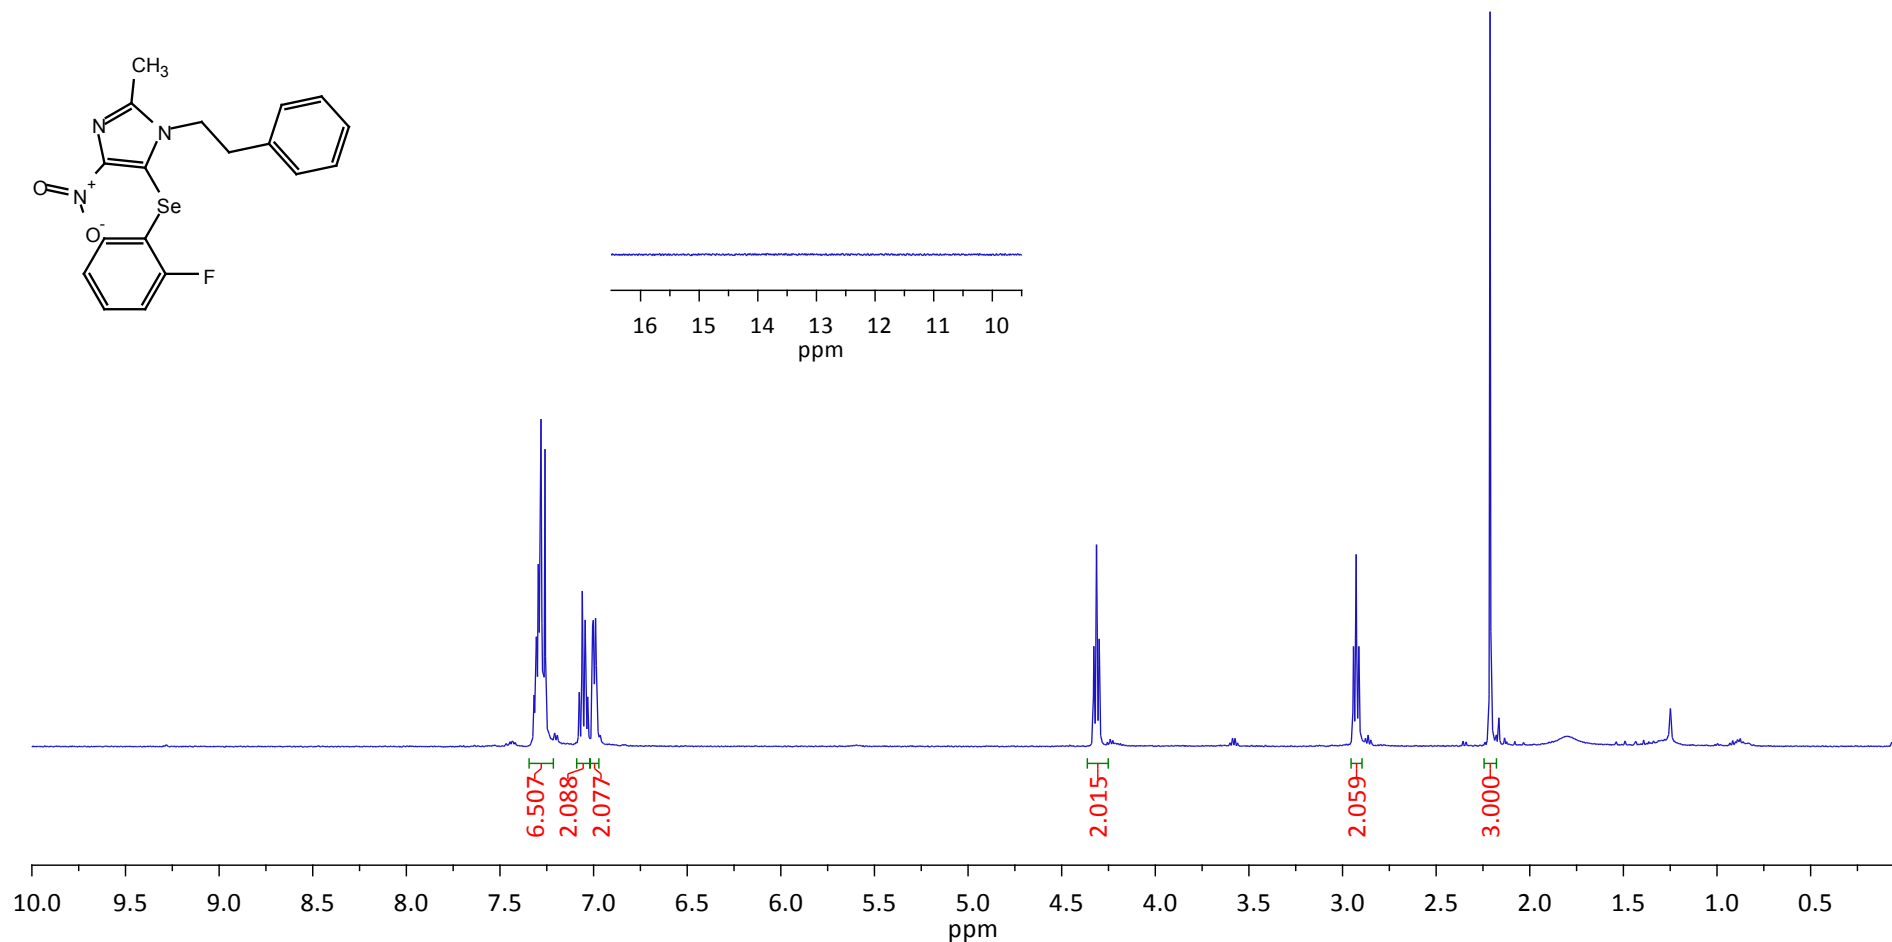

Comment s. mkrtyan =mj107-714=1H.stan CDCl3  
Number of Scans 32  
Spectrometer Frequency 500.13  
Spectral Width 12335.5  
Spectral Size 65536

Compound 9a

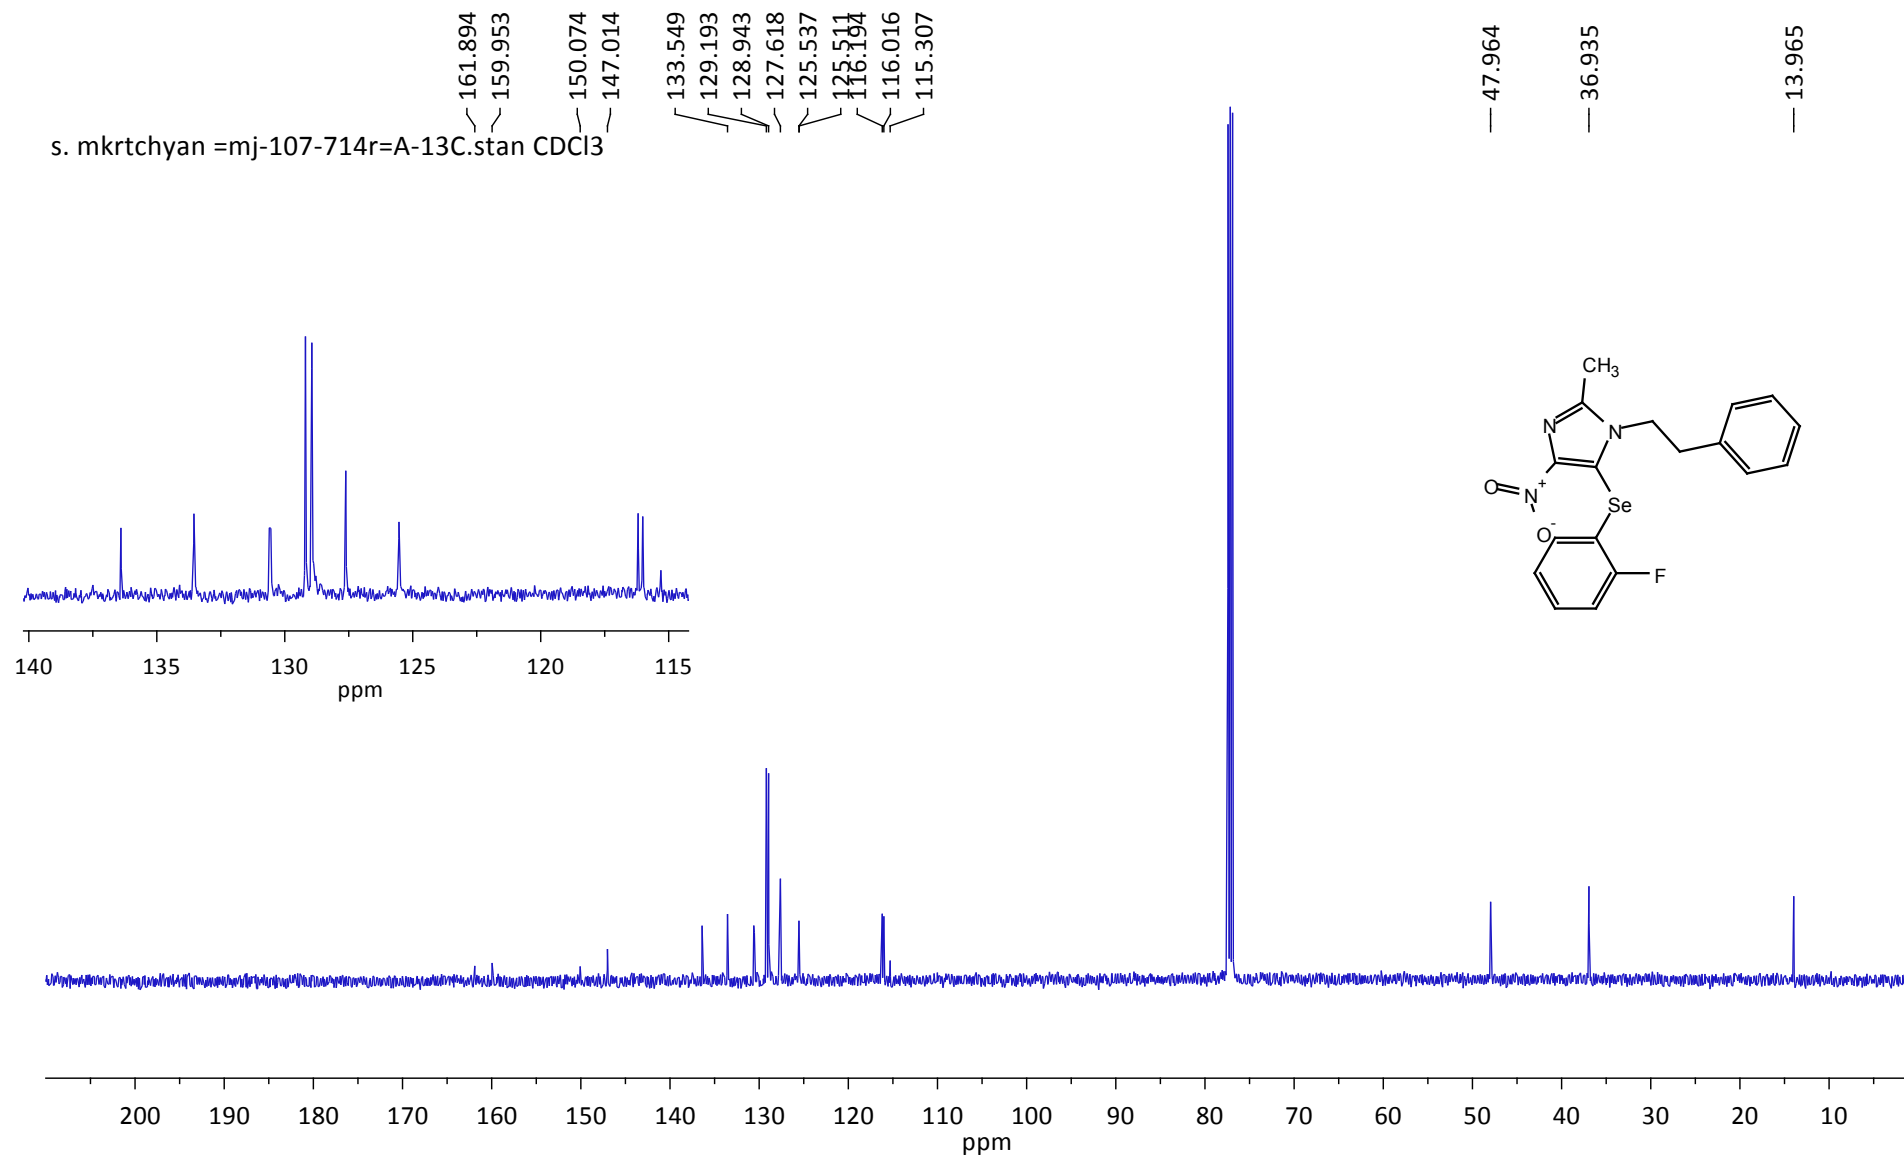

|                        |                                          |
|------------------------|------------------------------------------|
| Comment                | s. mkrtyan =mj-107-714r=A-13C.stan CDCl3 |
| Number of Scans        | 512                                      |
| Spectrometer Frequency | 125.76                                   |
| Spectral Width         | 36057.7                                  |
| Spectral Size          | 65536                                    |

Compound **9b**

7.435  
7.428  
7.281  
7.260  
6.981

4.243

2.901

2.164

s. mkrtyan =mj-75-3237=1H.stan CDCl3

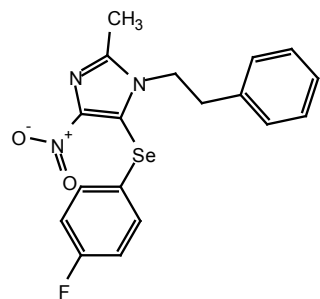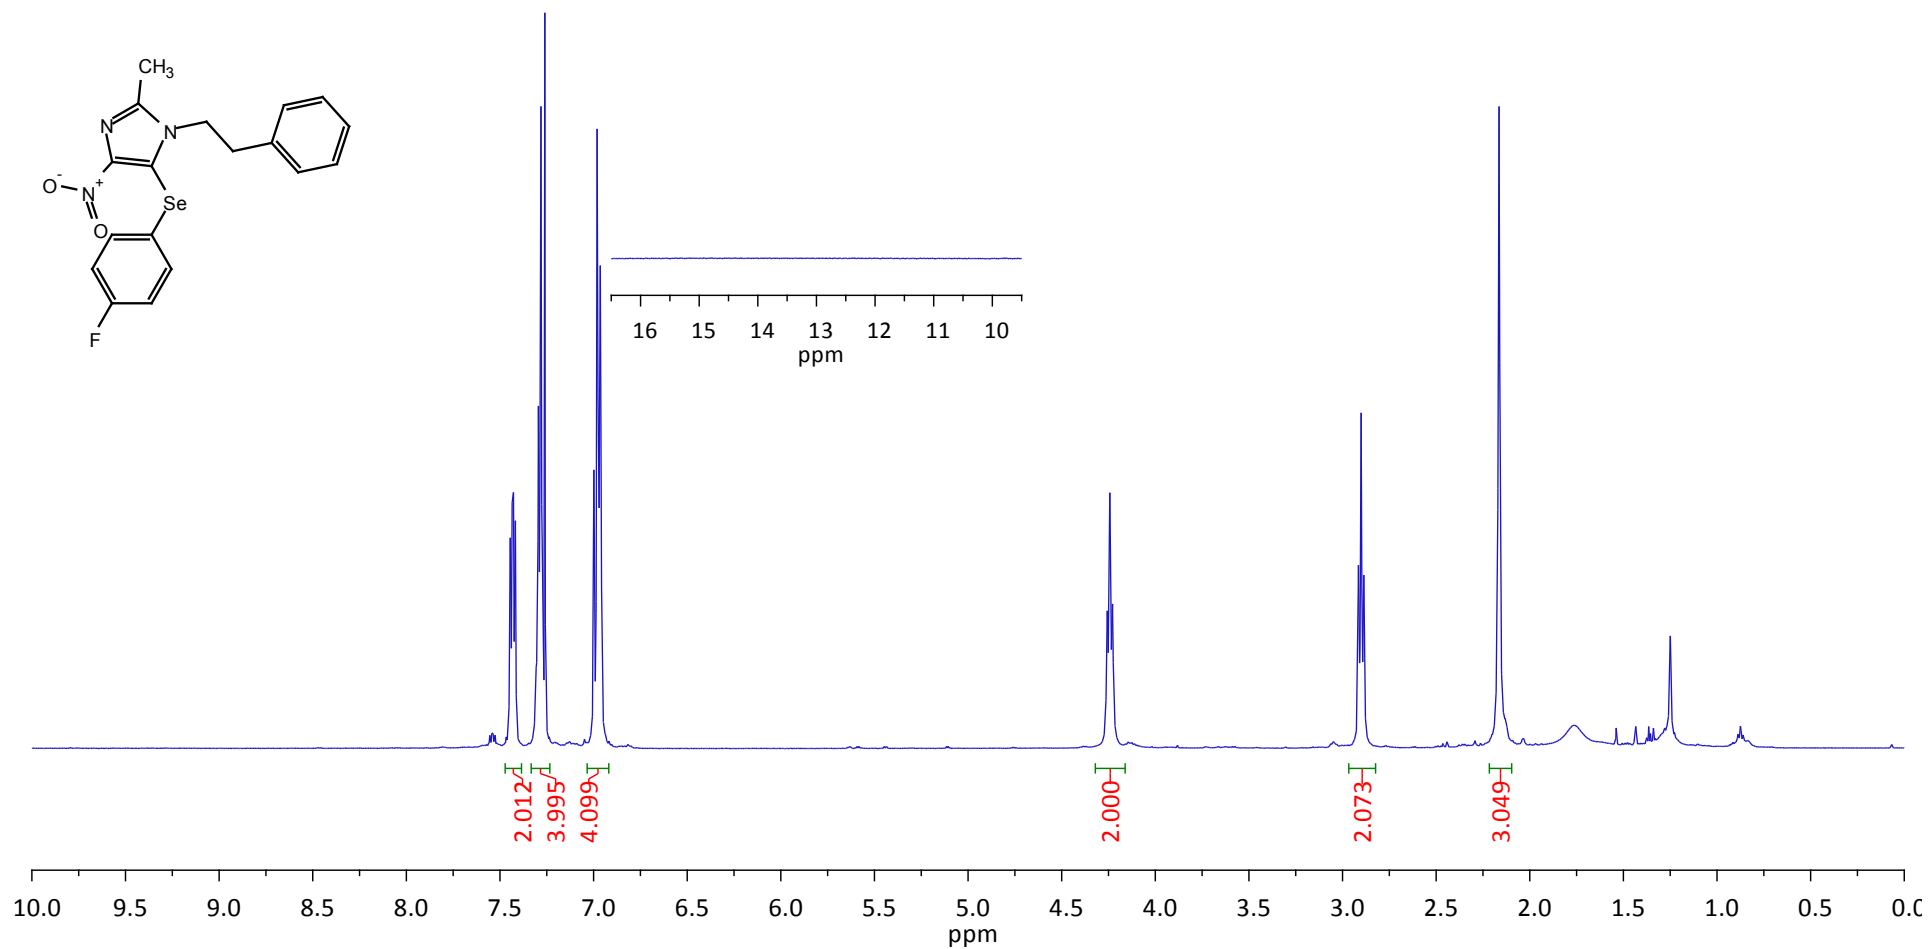

Comment s. mkrtyan =mj-75-3237=1H.stan CDCl3  
 Number of Scans 24  
 Spectrometer Frequency 500.13  
 Spectral Width 12335.5  
 Spectral Size 65536

Compound **9b**

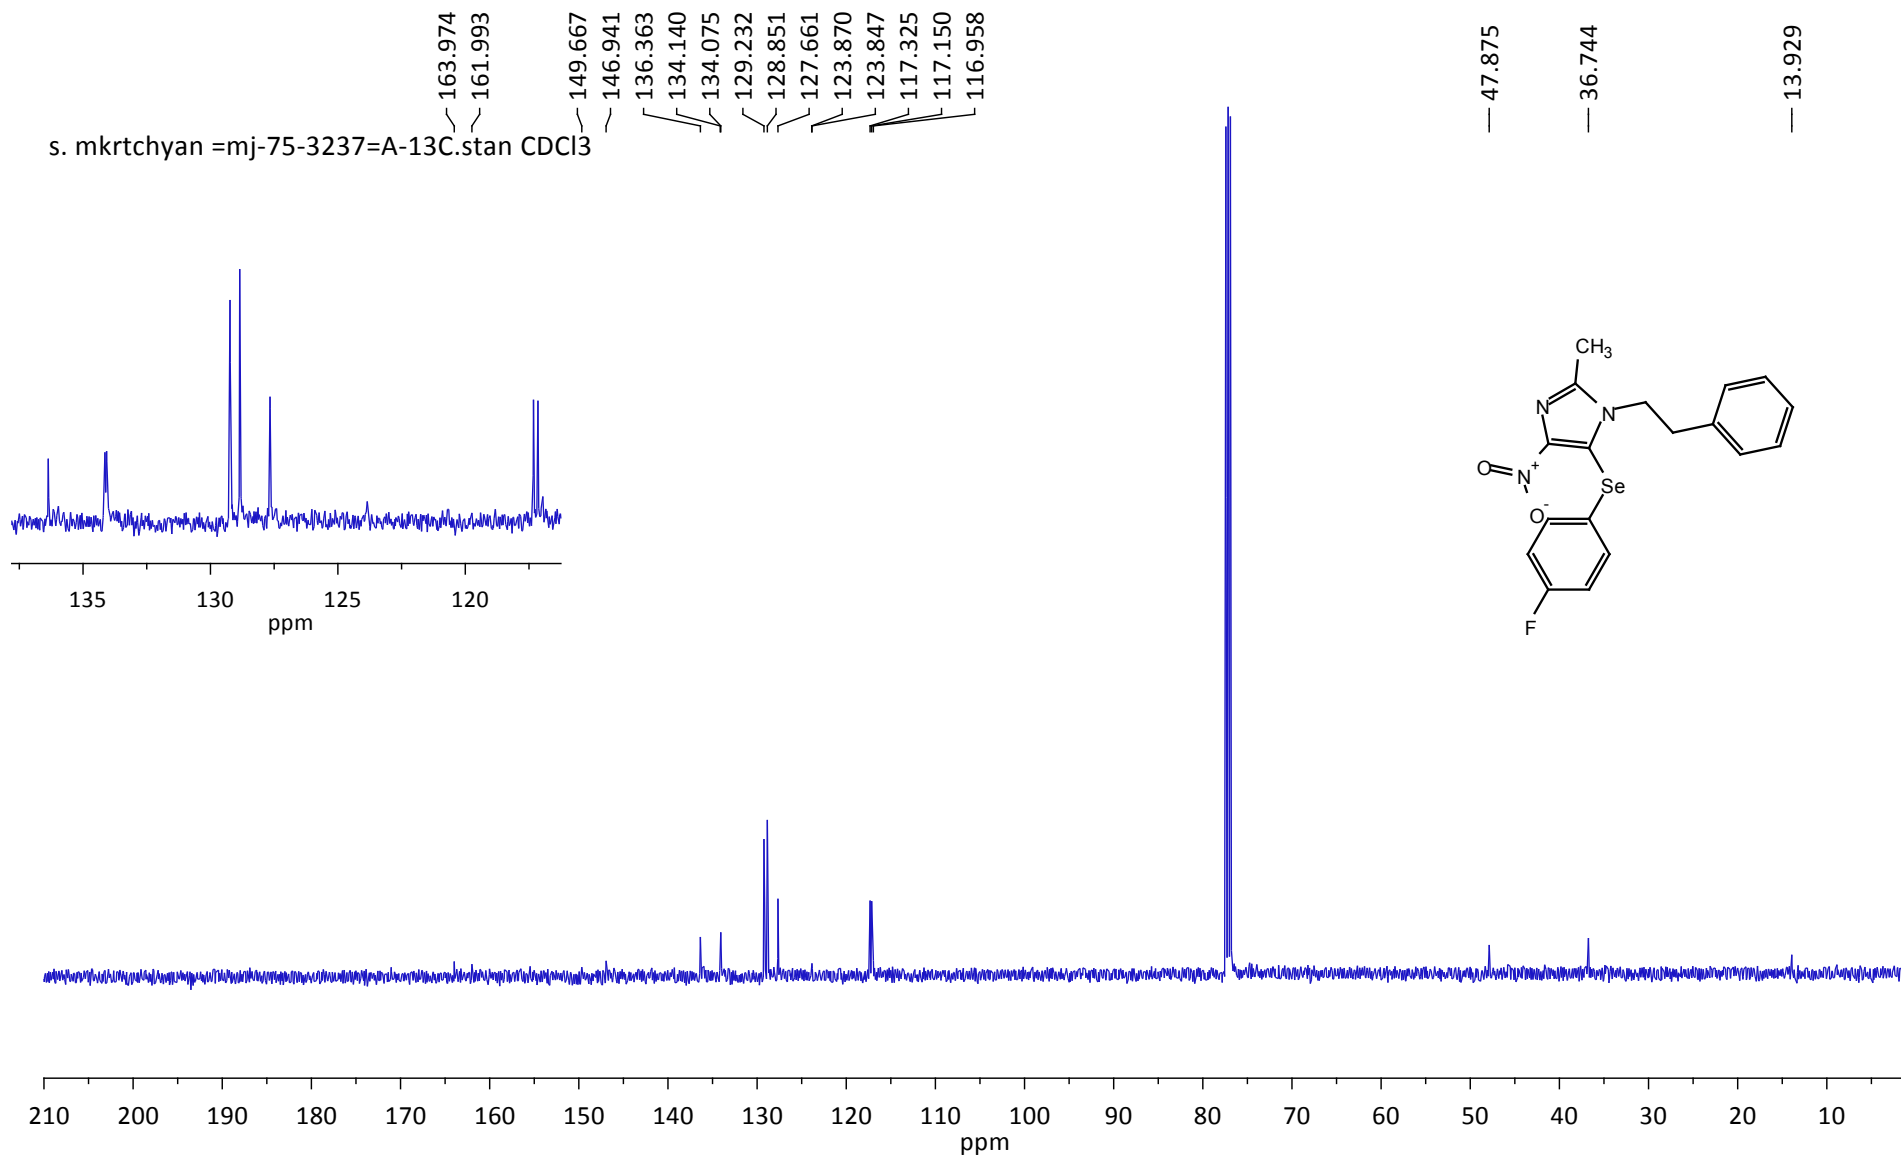

Comment s. mkrtyan =mj-75-3237=A-13C.stan CDCl<sub>3</sub>

Number of Scans 512

Spectrometer Frequency 125.76

Spectral Width 36057.7

Spectral Size 65536

Compound 10a

7.865  
7.668  
7.320  
7.260  
7.260  
6.958  
6.843

5.480

2.242

s. mkrtyan mj-174-10251H.stan CDCl3

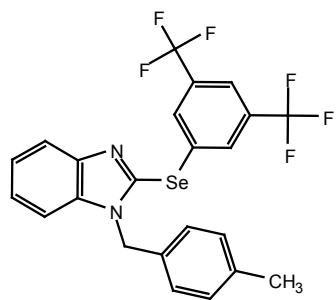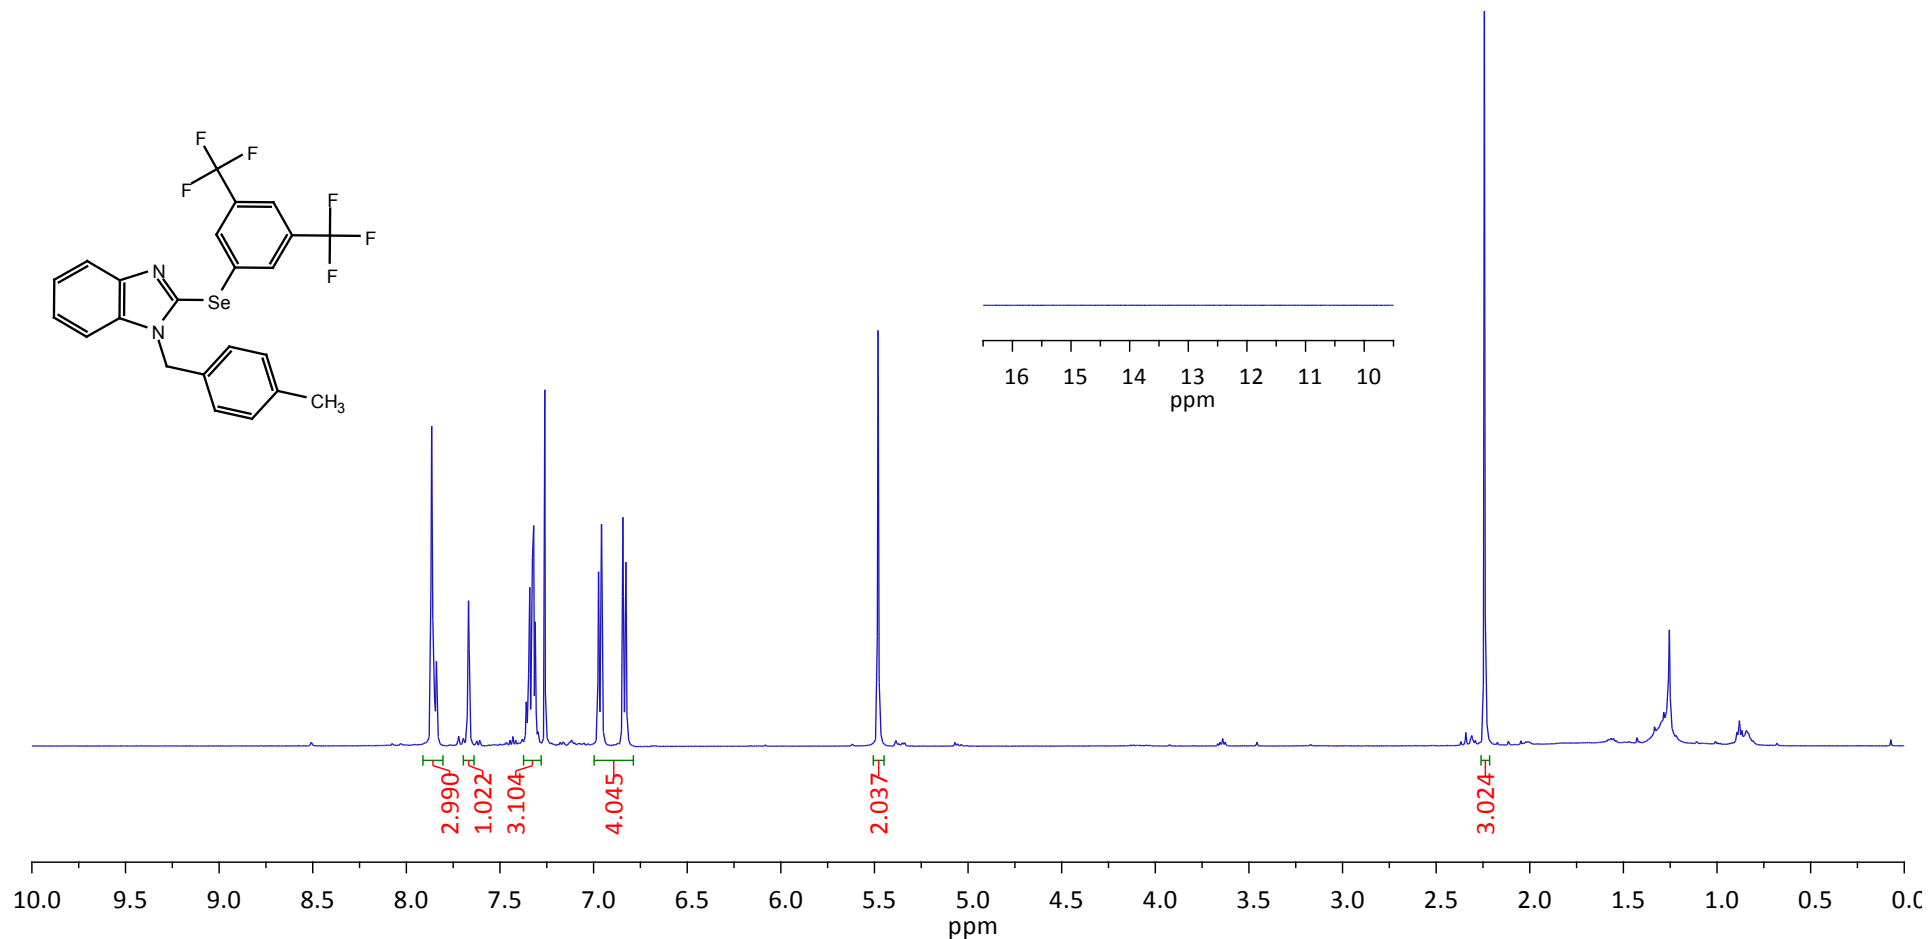

Comment s. mkrtyan mj-174-10251H.stan CDCl3  
 Number of Scans 24  
 Spectrometer Frequency 500.13  
 Spectral Width 12335.5  
 Spectral Size 65536

Compound 10a

141.911  
137.826  
136.114  
132.405  
132.255  
132.139  
130.975  
129.529  
126.266  
124.152  
122.980  
121.724  
120.181  
110.260

s. mkrtyan mj-174-1025A-13C.stan CDCl3

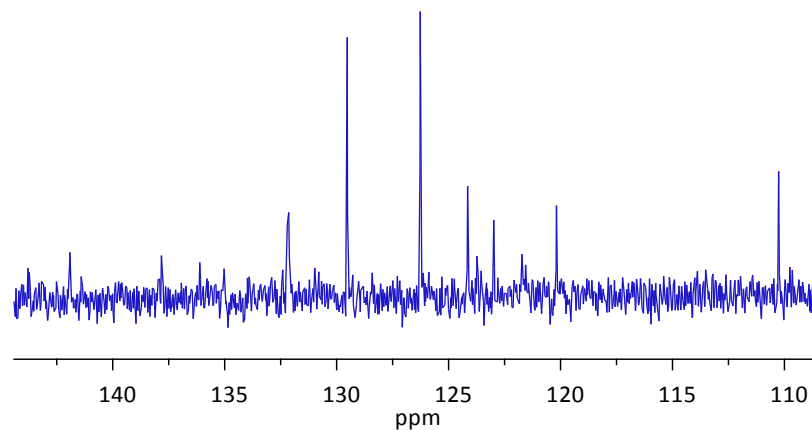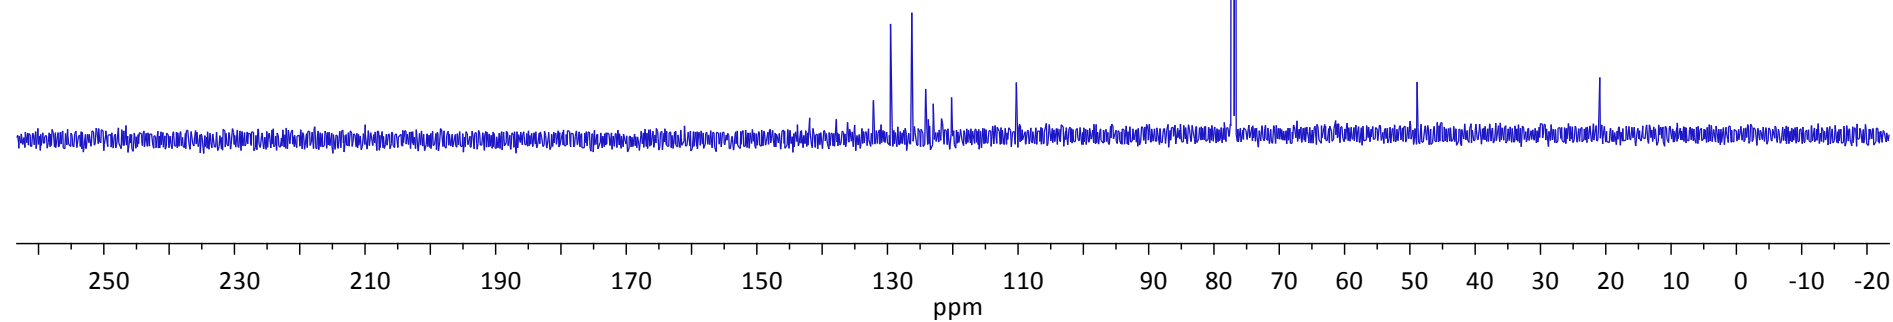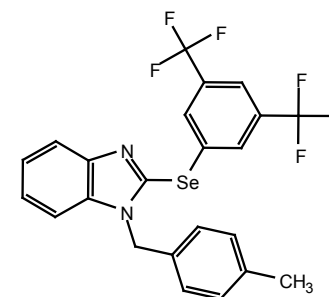

— 48.897

— 20.916

Comment s. mkrtyan mj-174-1025A-13C.stan CDCl3  
Number of Scans 512  
Spectrometer Frequency 125.76  
Spectral Width 36057.7  
Spectral Size 65536



Compound **10b**

7.845  
7.831  
7.412  
7.396  
7.337  
7.272  
7.271  
7.223  
7.095  
7.093  
7.028  
7.012  
6.898  
6.882  
5.444

s. mkrtyan mj-173-22281H.stan CDCl3

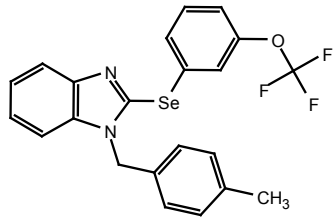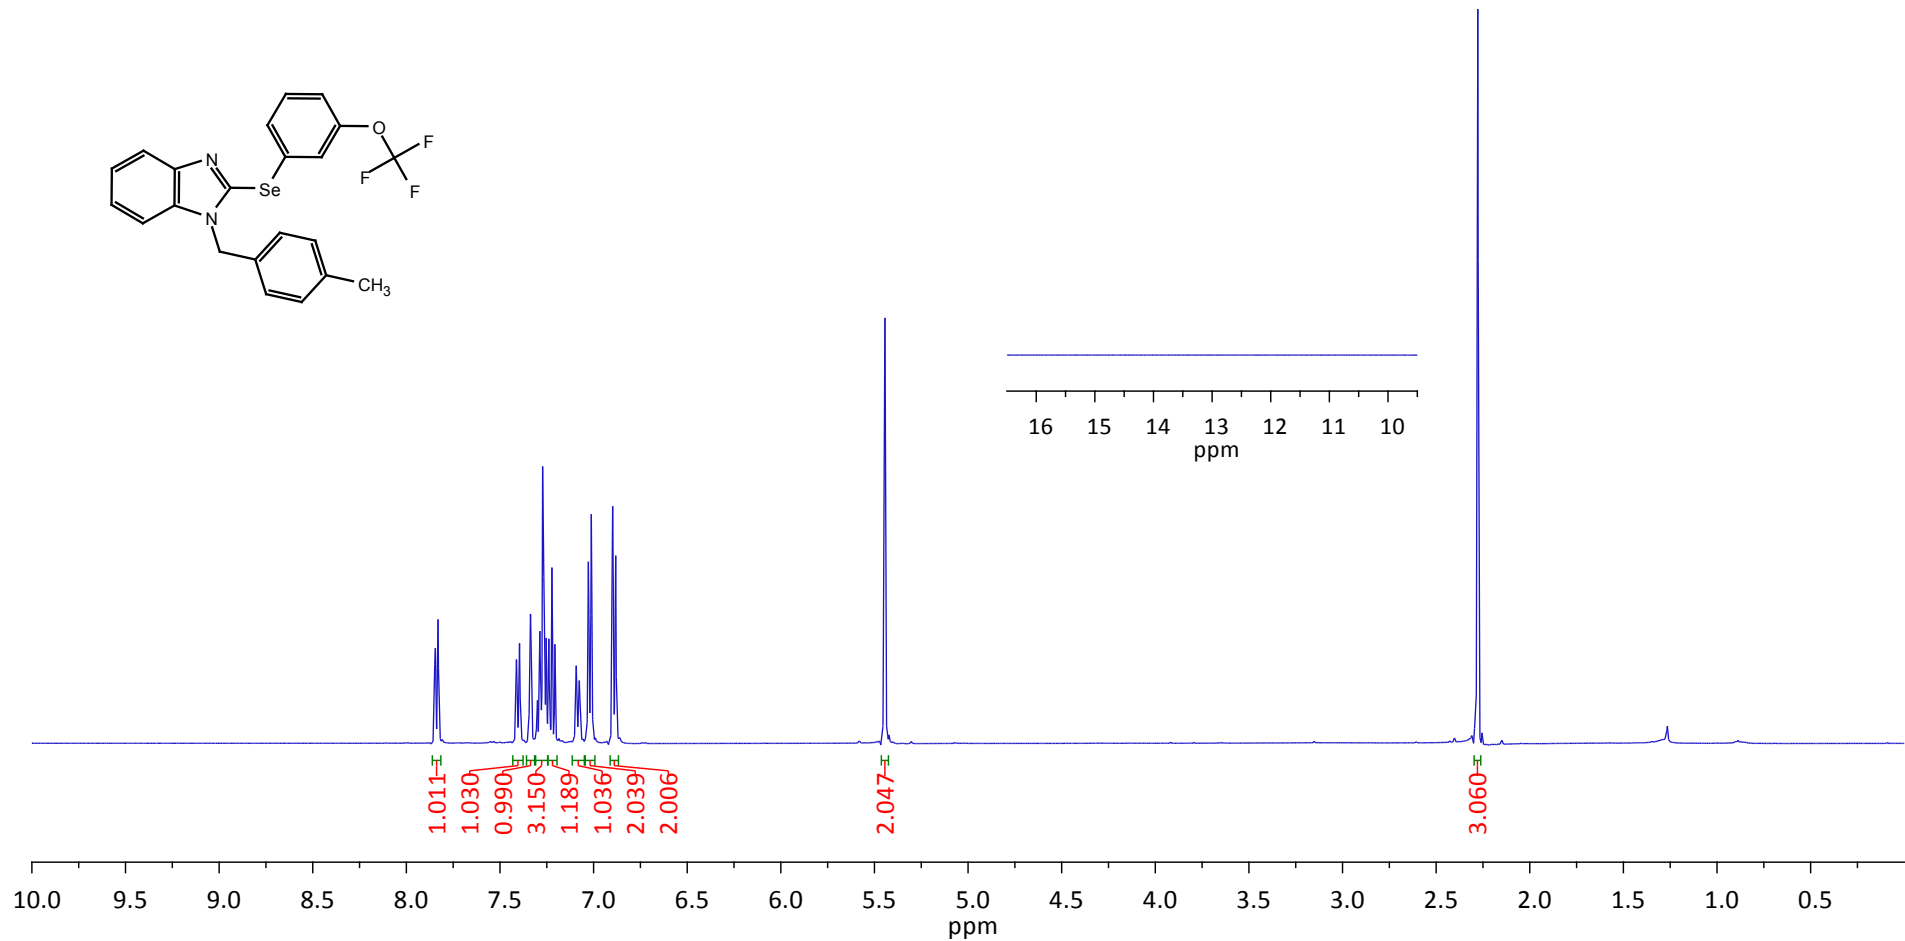

Comment s. mkrtyan mj-173-22281H.stan CDCl3  
 Number of Scans 24  
 Spectrometer Frequency 500.13  
 Spectral Width 12335.5  
 Spectral Size 65536

Compound 10b

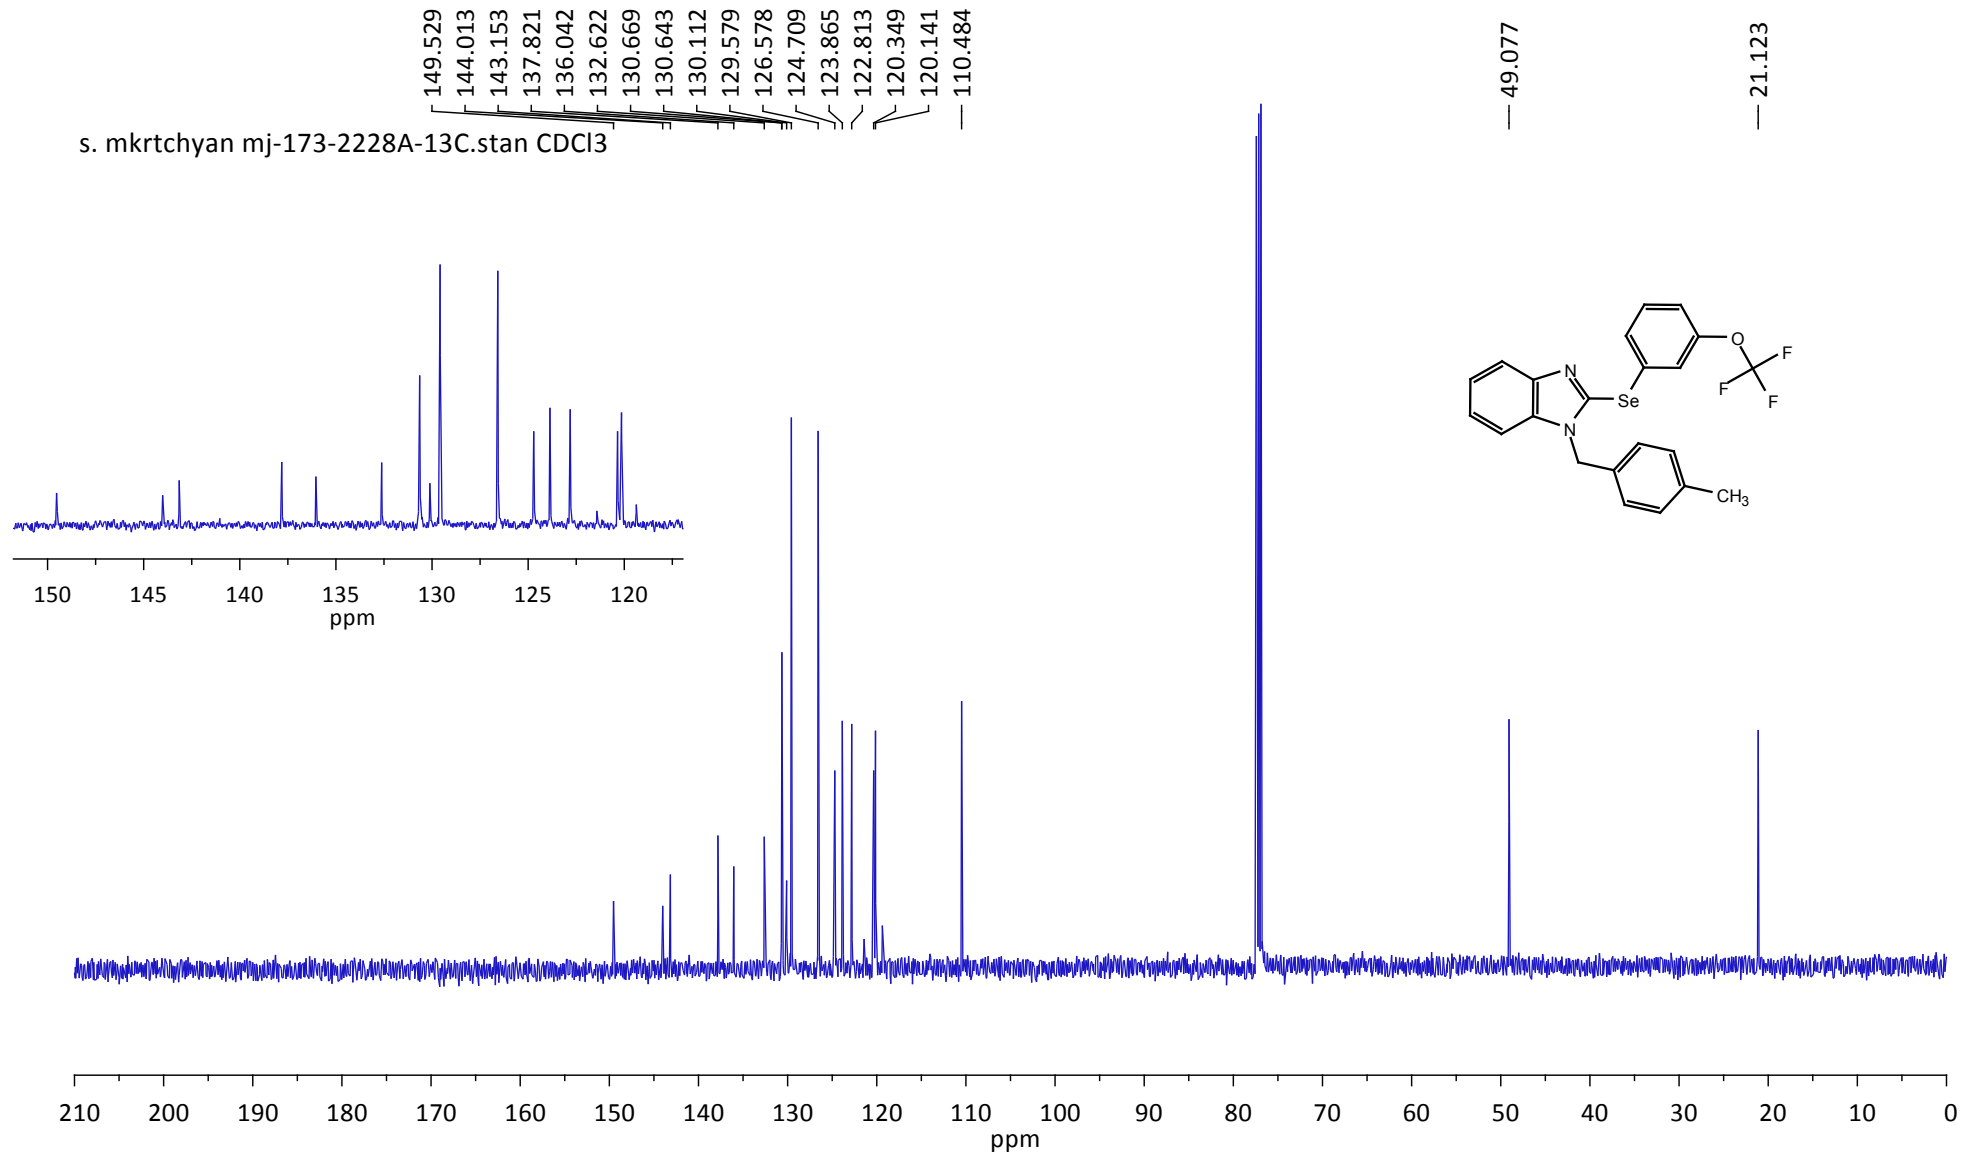

Comment s. mkrтчyan mj-173-2228A-13C.stan CDCl3  
Number of Scans 256  
Spectrometer Frequency 125.76  
Spectral Width 36057.7  
Spectral Size 65536

Compound **11**

s. mkrтчyan mj-168-49631H.stan CDCl<sub>3</sub>

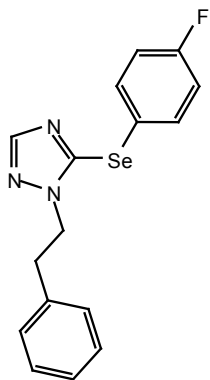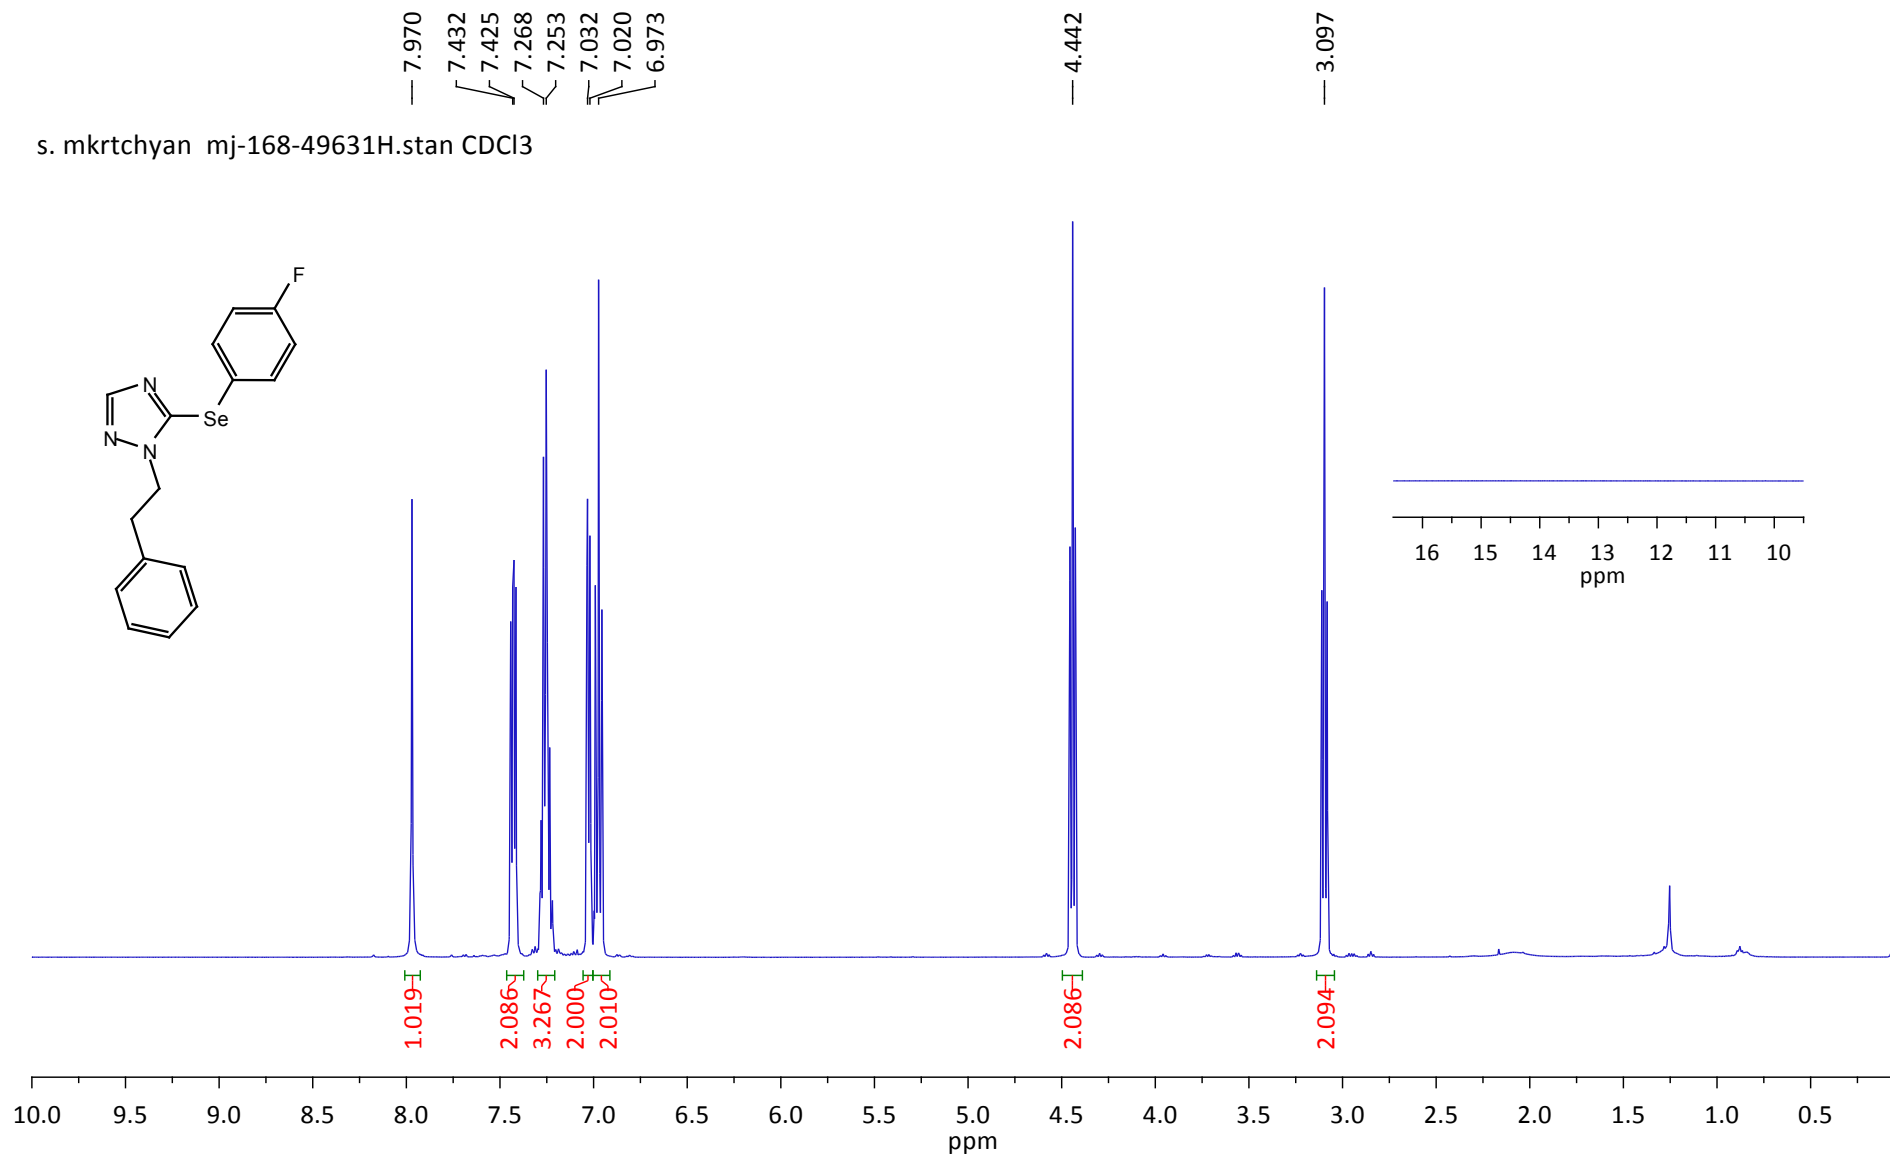

|                        |                                                  |
|------------------------|--------------------------------------------------|
| Comment                | s. mkrтчyan mj-168-49631H.stan CDCl <sub>3</sub> |
| Number of Scans        | 24                                               |
| Spectrometer Frequency | 500.13                                           |
| Spectral Width         | 12335.5                                          |
| Spectral Size          | 65536                                            |

Compound 11

s. mkrtyan mj-168-4963A-13C.stan CDCl3

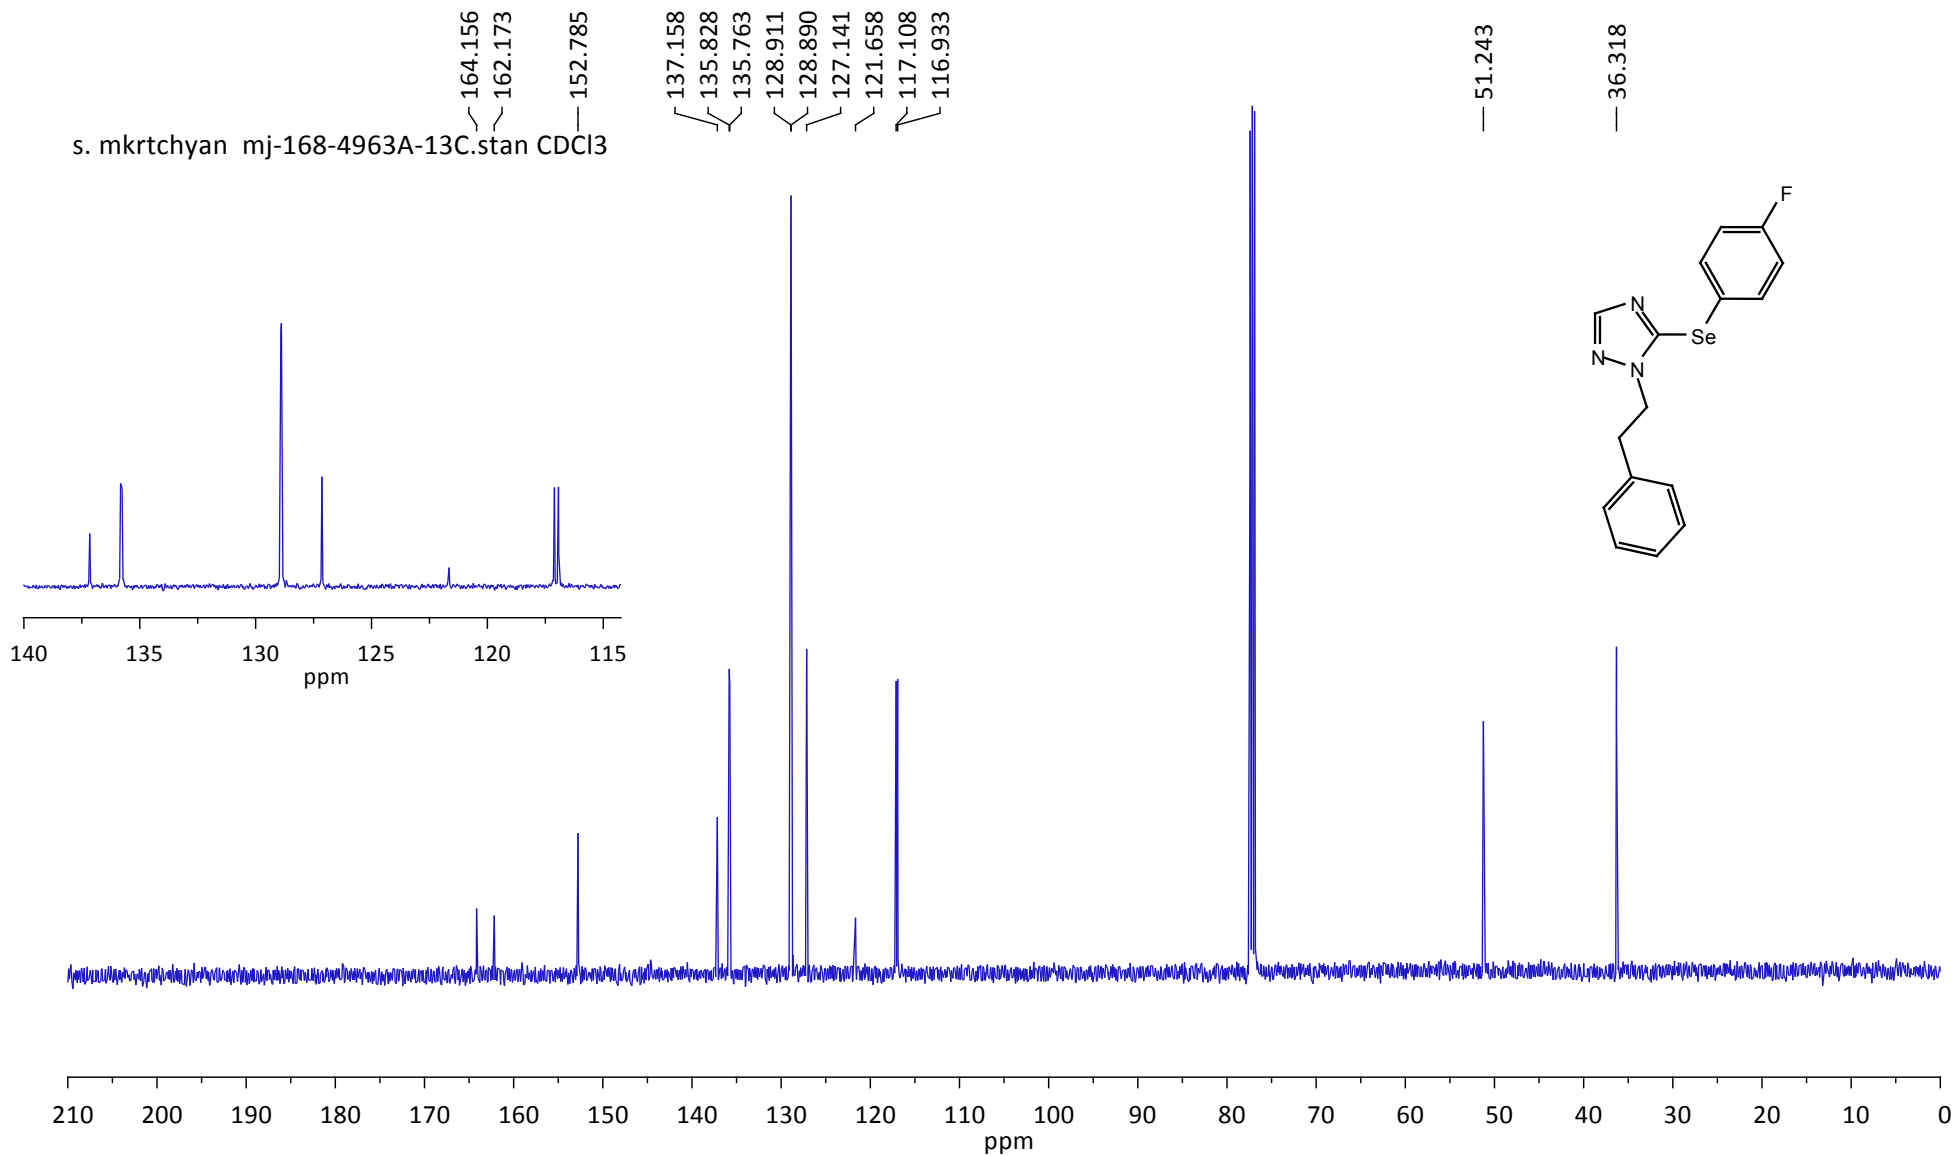

Comment s. mkrtyan mj-168-4963A-13C.stan CDCl3  
 Number of Scans 512  
 Spectrometer Frequency 125.76  
 Spectral Width 36057.7  
 Spectral Size 65536

Compound **12a**

8.247  
8.234  
8.231  
7.793  
7.662  
7.560  
7.544  
7.428  
7.414  
7.411  
7.260  
7.160  
7.144

2.640  
2.625

1.222

s. mkrtyan =mj-33-3537=1H.stan CDCl3

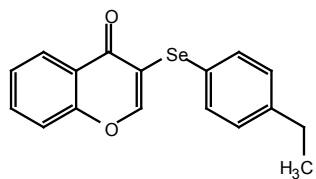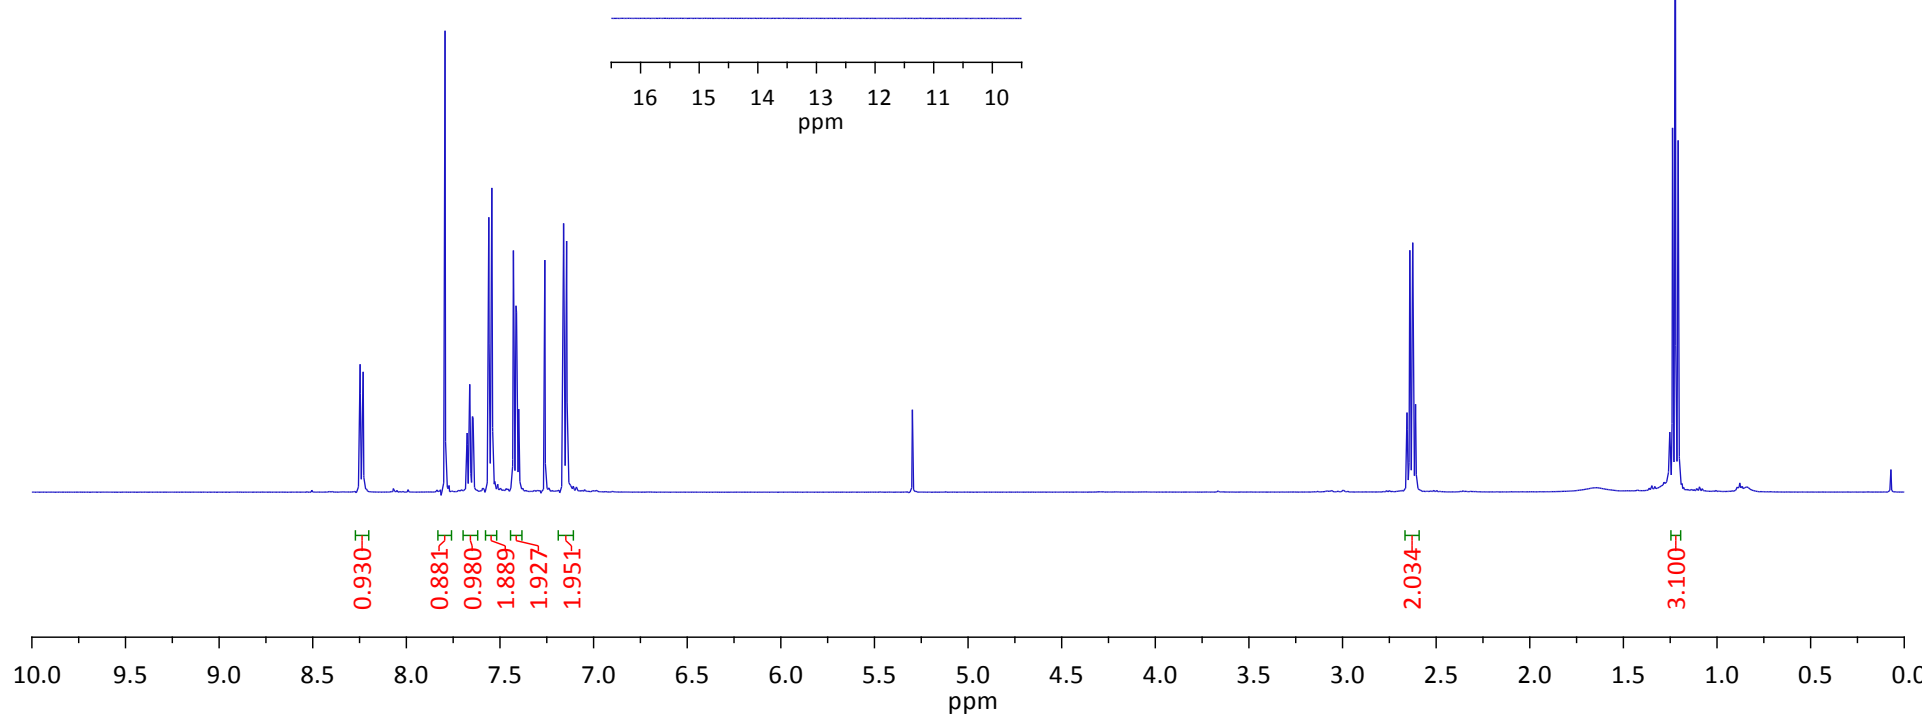

Comment s. mkrtyan =mj-33-3537=1H.stan CDCl3  
 Number of Scans 24  
 Spectrometer Frequency 500.13  
 Spectral Width 12335.5  
 Spectral Size 65536

Compound **12a**

s. mkrtchyan =mj-33-3537=A-13C.stan CDCl<sub>3</sub>

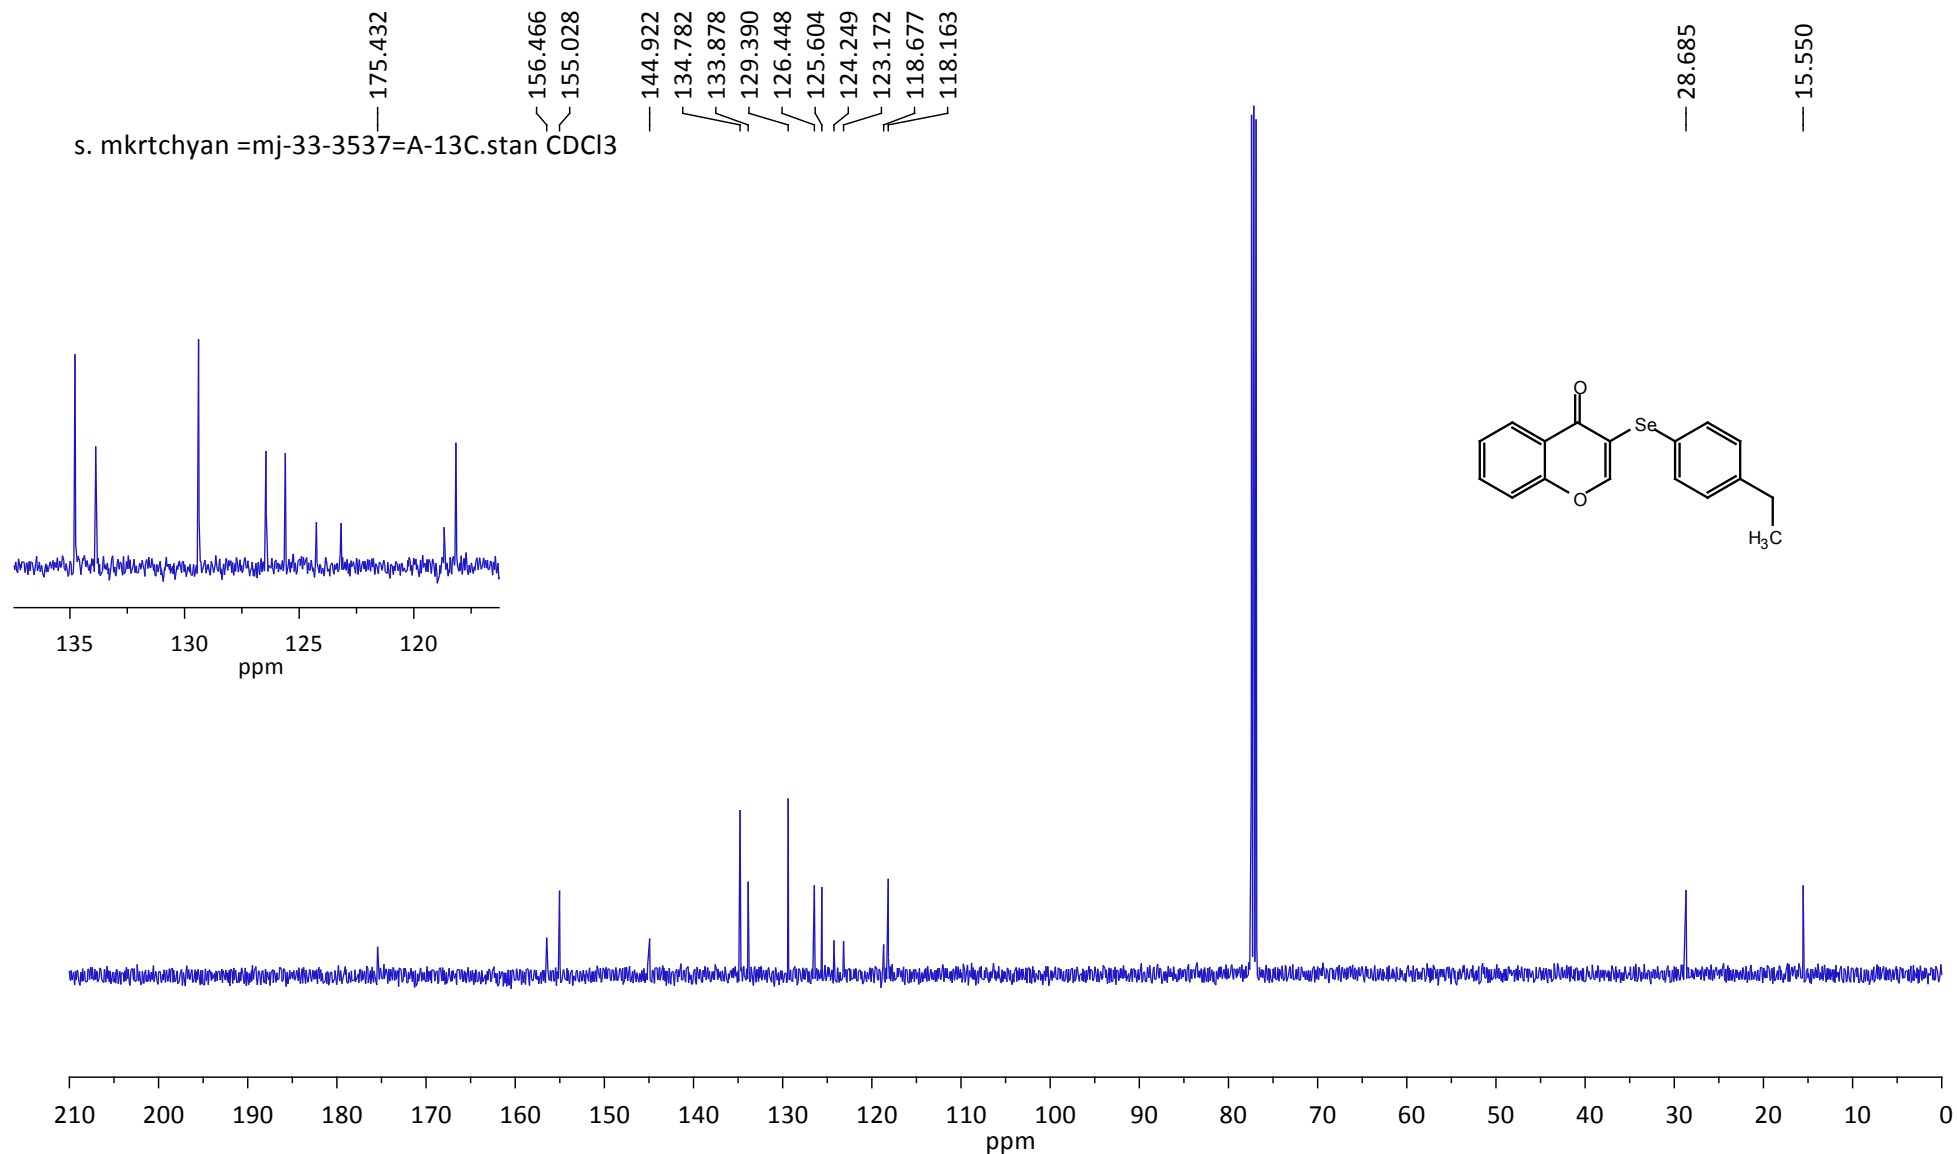

|                        |                                                       |
|------------------------|-------------------------------------------------------|
| Comment                | s. mkrtchyan =mj-33-3537=A-13C.stan CDCl <sub>3</sub> |
| Number of Scans        | 256                                                   |
| Spectrometer Frequency | 125.76                                                |
| Spectral Width         | 36057.7                                               |
| Spectral Size          | 65536                                                 |

# Compound 12b

s. mkrtychyan =mj-37-3739=1H.stan CDCl3

8.237  
8.234  
8.221  
8.218  
7.894  
7.673  
7.626  
7.619  
7.423  
7.260  
7.260  
7.004

Chloroform-d

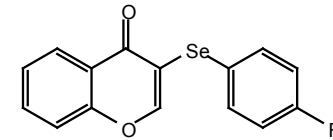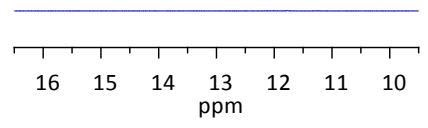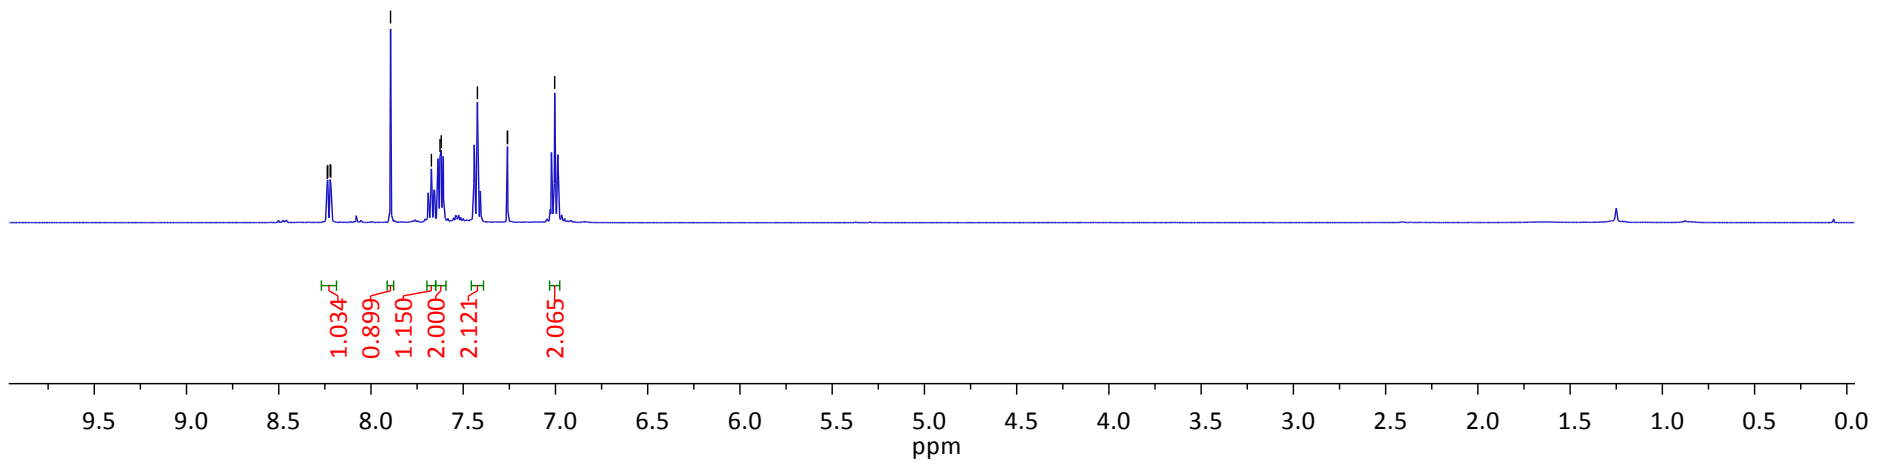

Comment s. mkrtychyan =mj-37-3739=1H.stan CDCl3  
Number of Scans 32  
Spectrometer Frequency 500.13  
Spectral Width 12335.5  
Spectral Size 65536

Compound 12b

s. mkrtyan =mj-37-3739=A-13C.stan CDCl3

136.585  
136.521  
134.045  
126.457  
125.763  
123.261  
122.653  
122.626  
118.208  
118.170  
116.986  
116.814

175.310  
164.076  
162.100  
156.466  
155.677

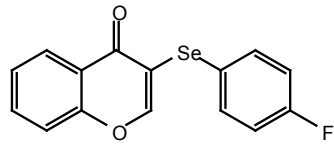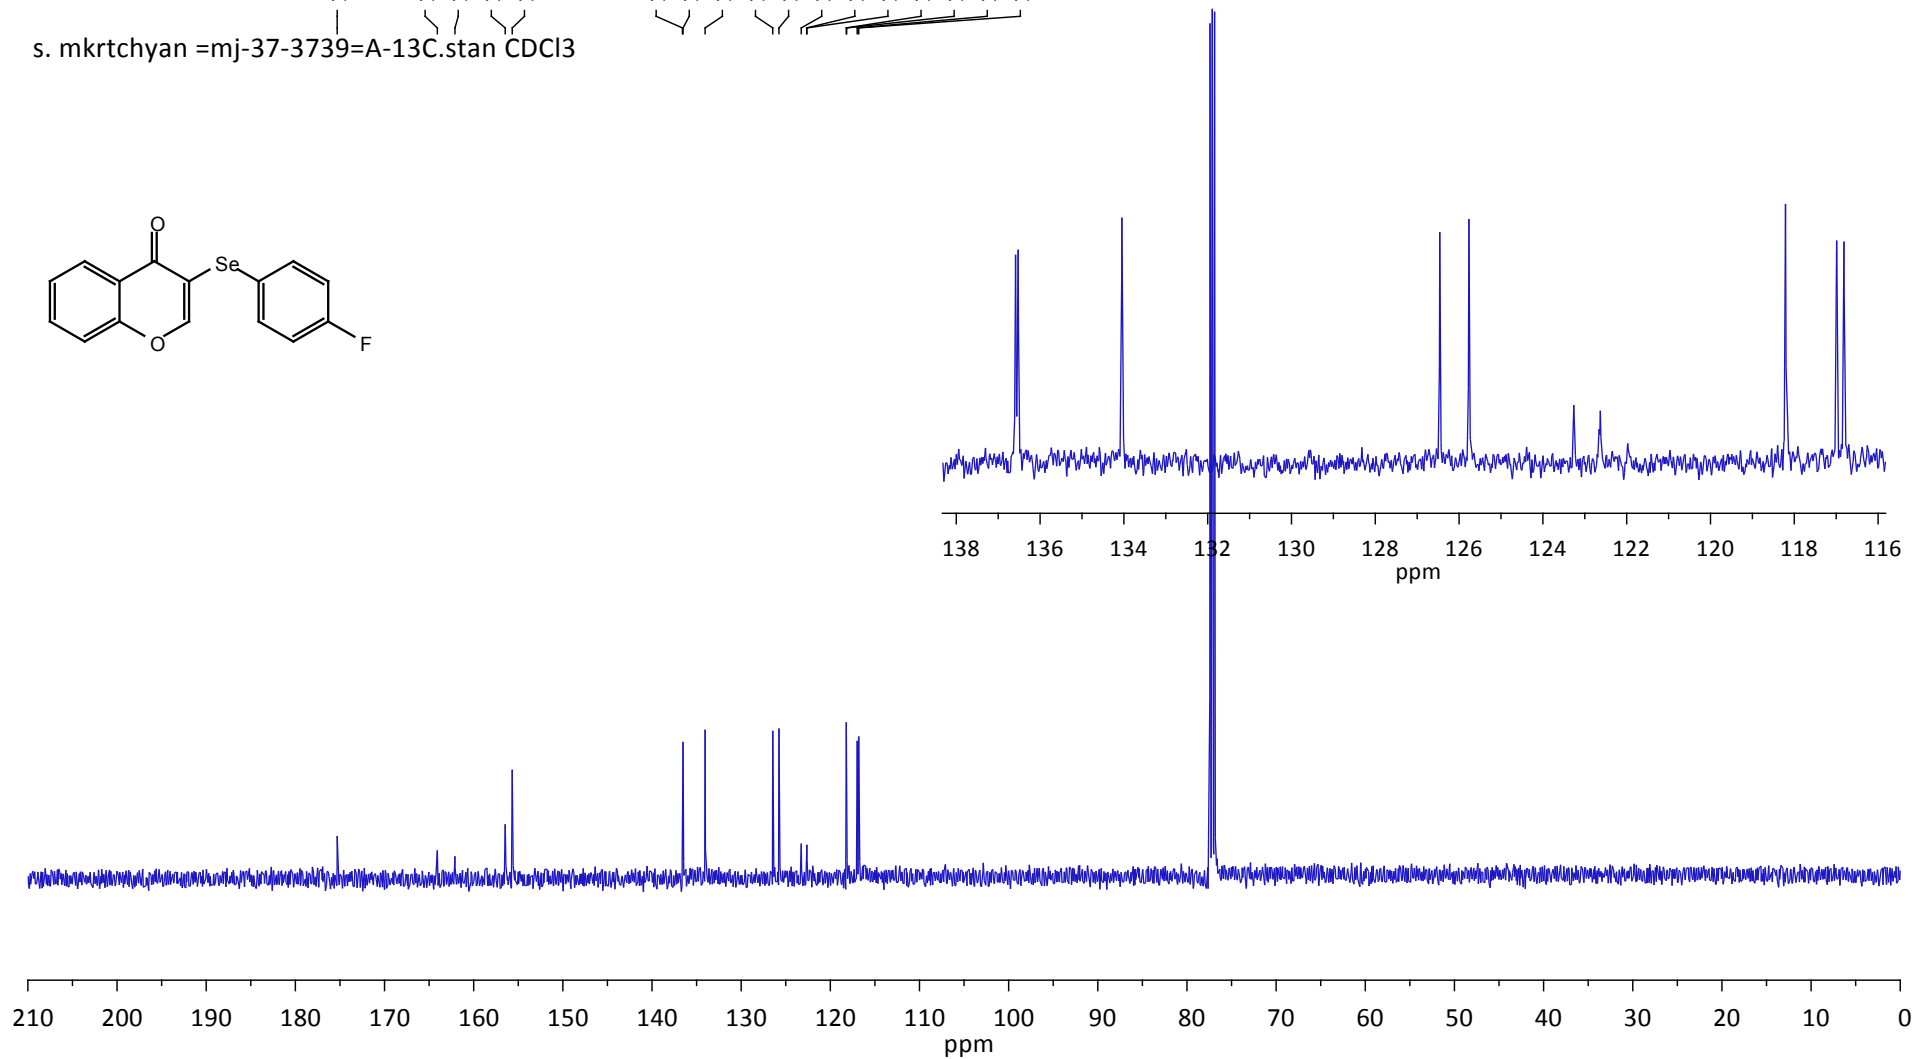

Comment s. mkrtyan =mj-37-3739=A-13C.stan CDCl3  
Number of Scans 256  
Spectrometer Frequency 125.76  
Spectral Width 36057.7  
Spectral Size 65536



Compound **13a**

— 8.176  
~ 7.537  
~ 7.366  
~ 7.260

— 5.267

s. mkrtyan =mj-134-1526=1H.stan CDCl3

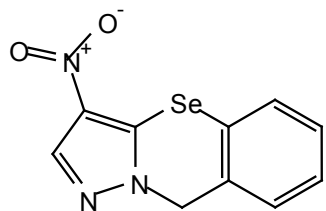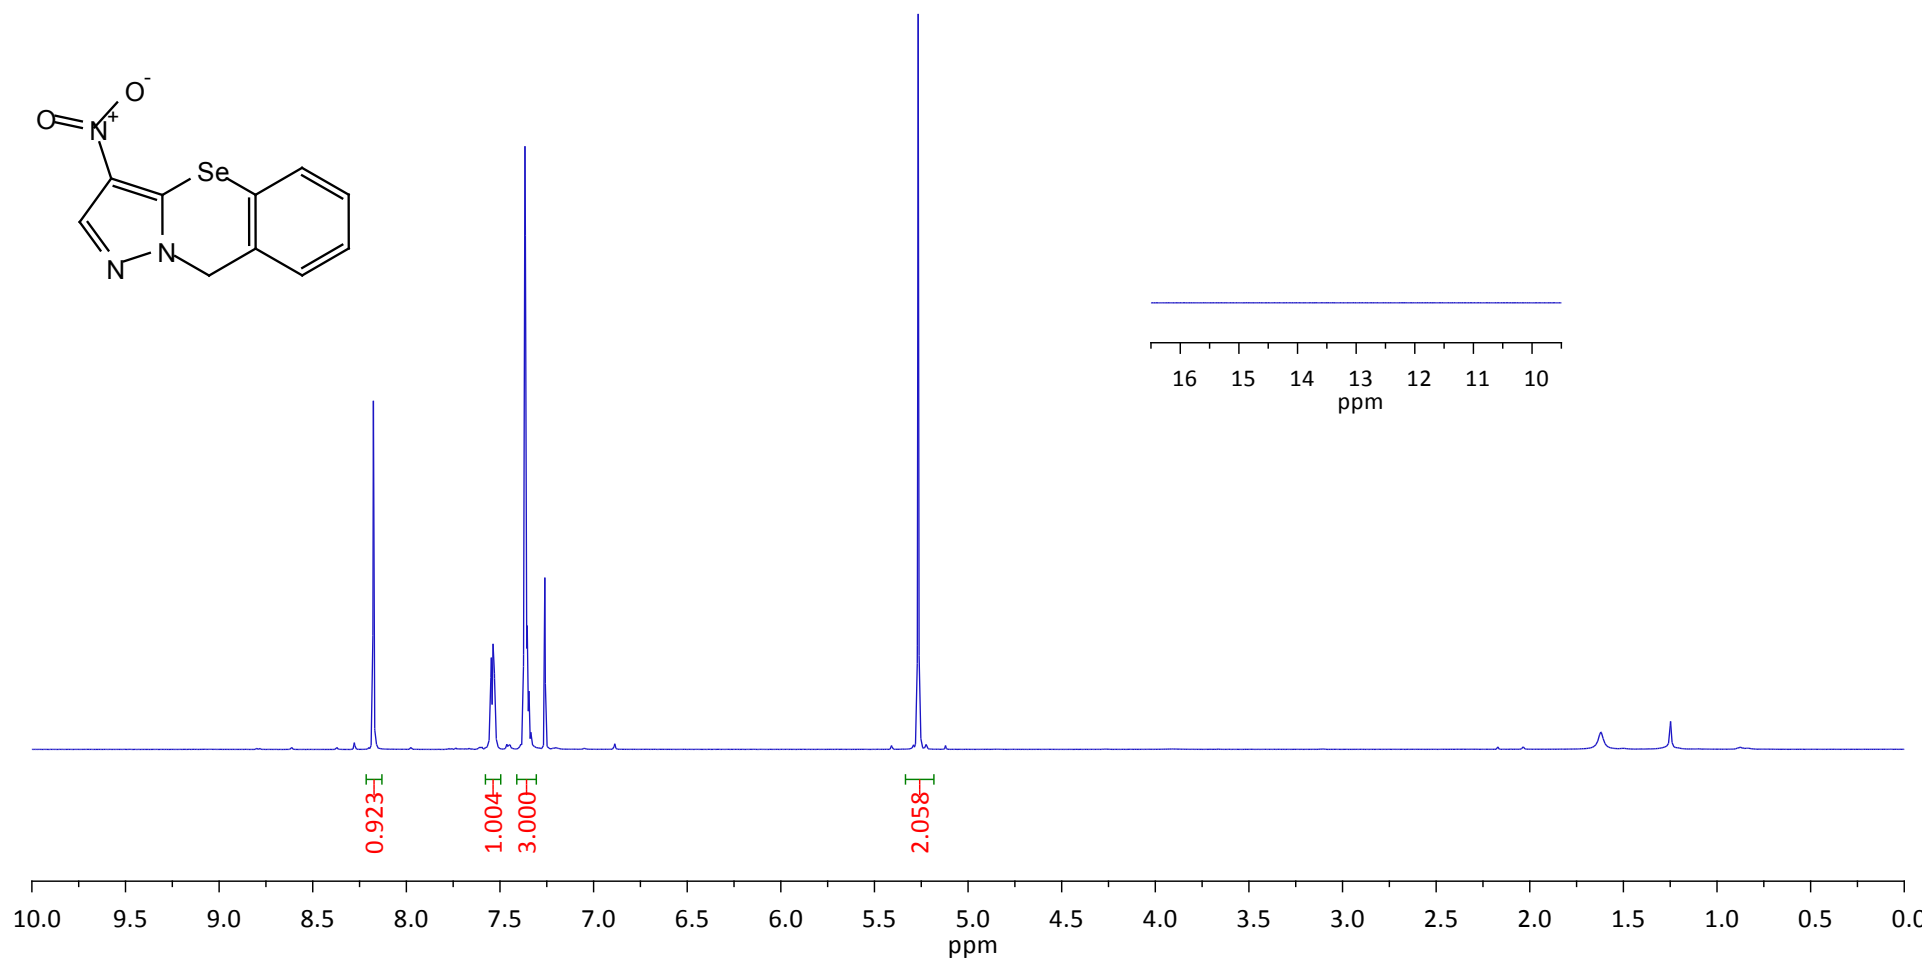

Comment s. mkrtyan =mj-134-1526=1H.stan CDCl3  
Number of Scans 24  
Spectrometer Frequency 500.13  
Spectral Width 12335.5  
Spectral Size 65536

Compound 13a

s. mkrtchyan =mj-134-1526=A-13C.stan CDCl3

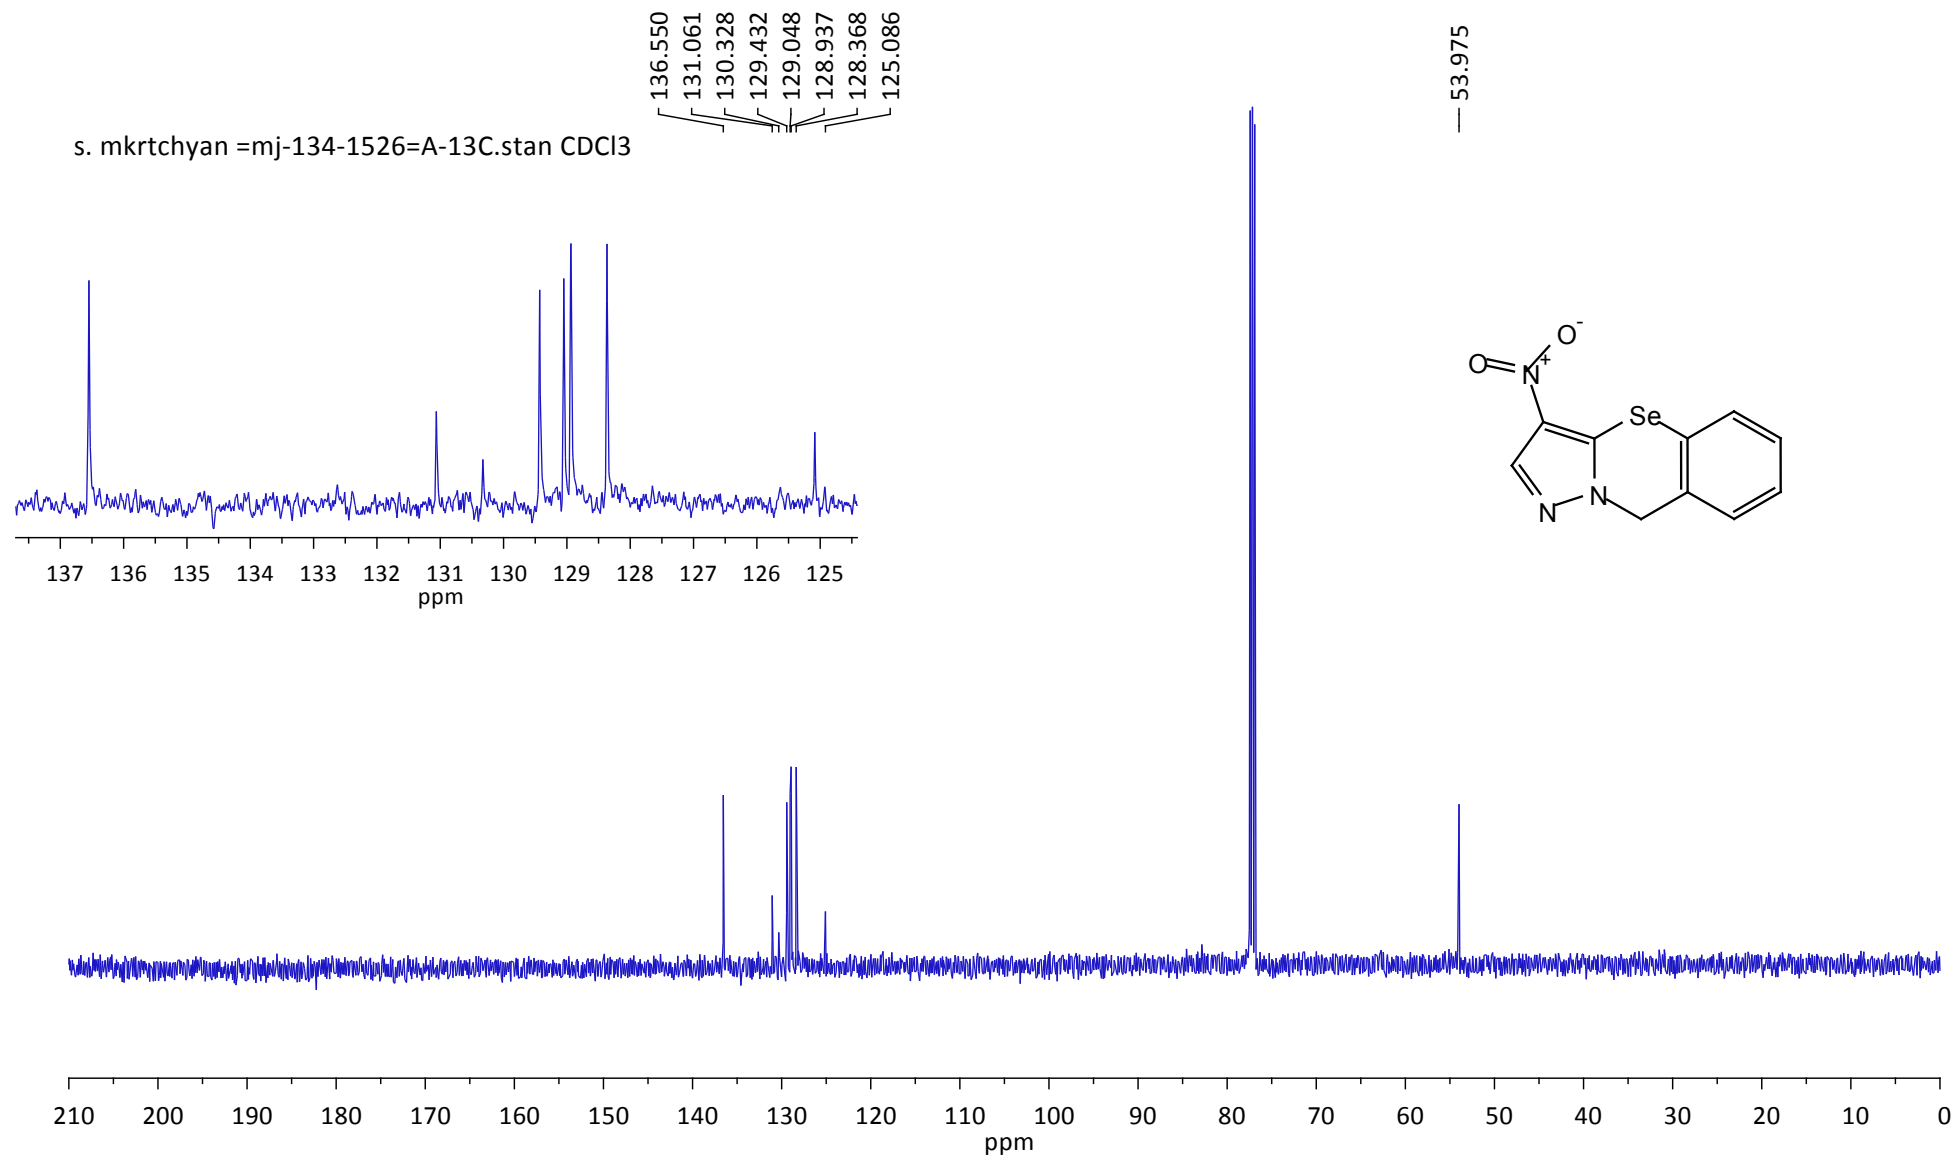

|                        |                                            |
|------------------------|--------------------------------------------|
| Comment                | s. mkrtchyan =mj-134-1526=A-13C.stan CDCl3 |
| Number of Scans        | 256                                        |
| Spectrometer Frequency | 125.76                                     |
| Spectral Width         | 36057.7                                    |
| Spectral Size          | 65536                                      |

Compound **13b**

— 8.156  
└─ 7.779  
└─ 7.762  
└─ 7.502  
└─ 7.400  
└─ 7.393

— 5.313

s. mkrtyan =mja-167-1224=1H.stan DMSO

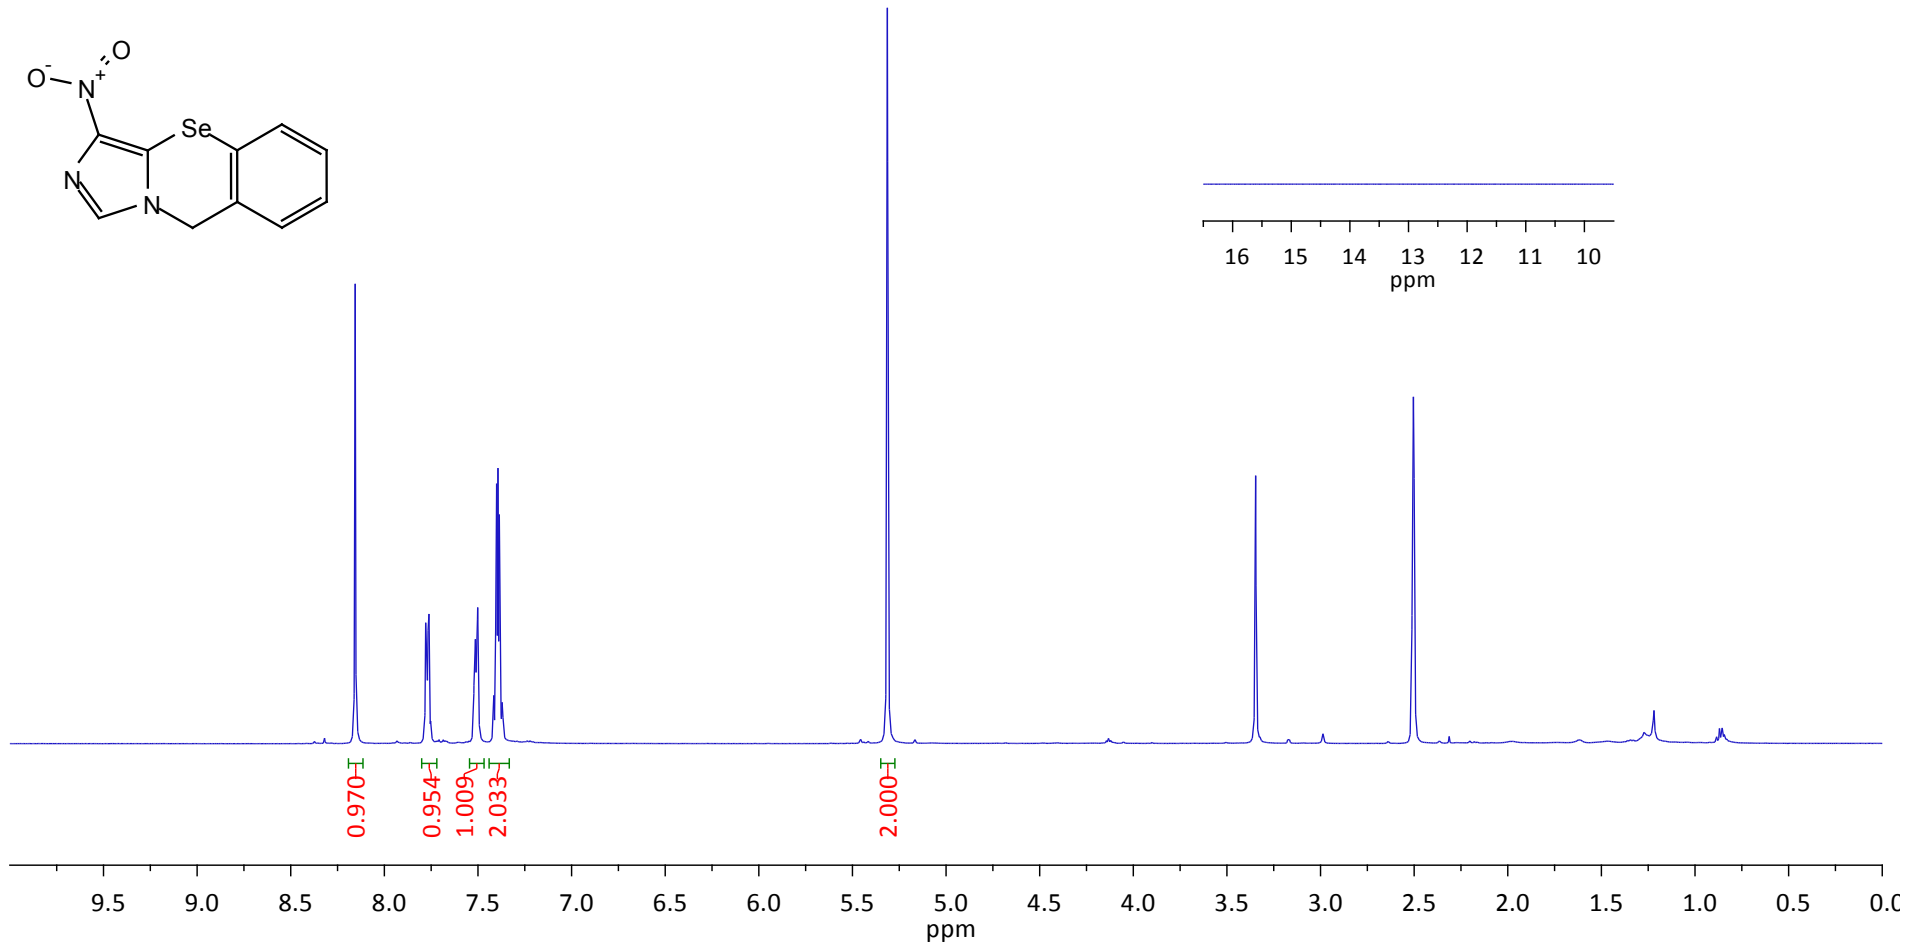

Comment s. mkrtyan =mja-167-1224=1H.stan DMSO  
Number of Scans 39  
Spectrometer Frequency 500.13  
Spectral Width 12335.5  
Spectral Size 65536

Compound **13b**

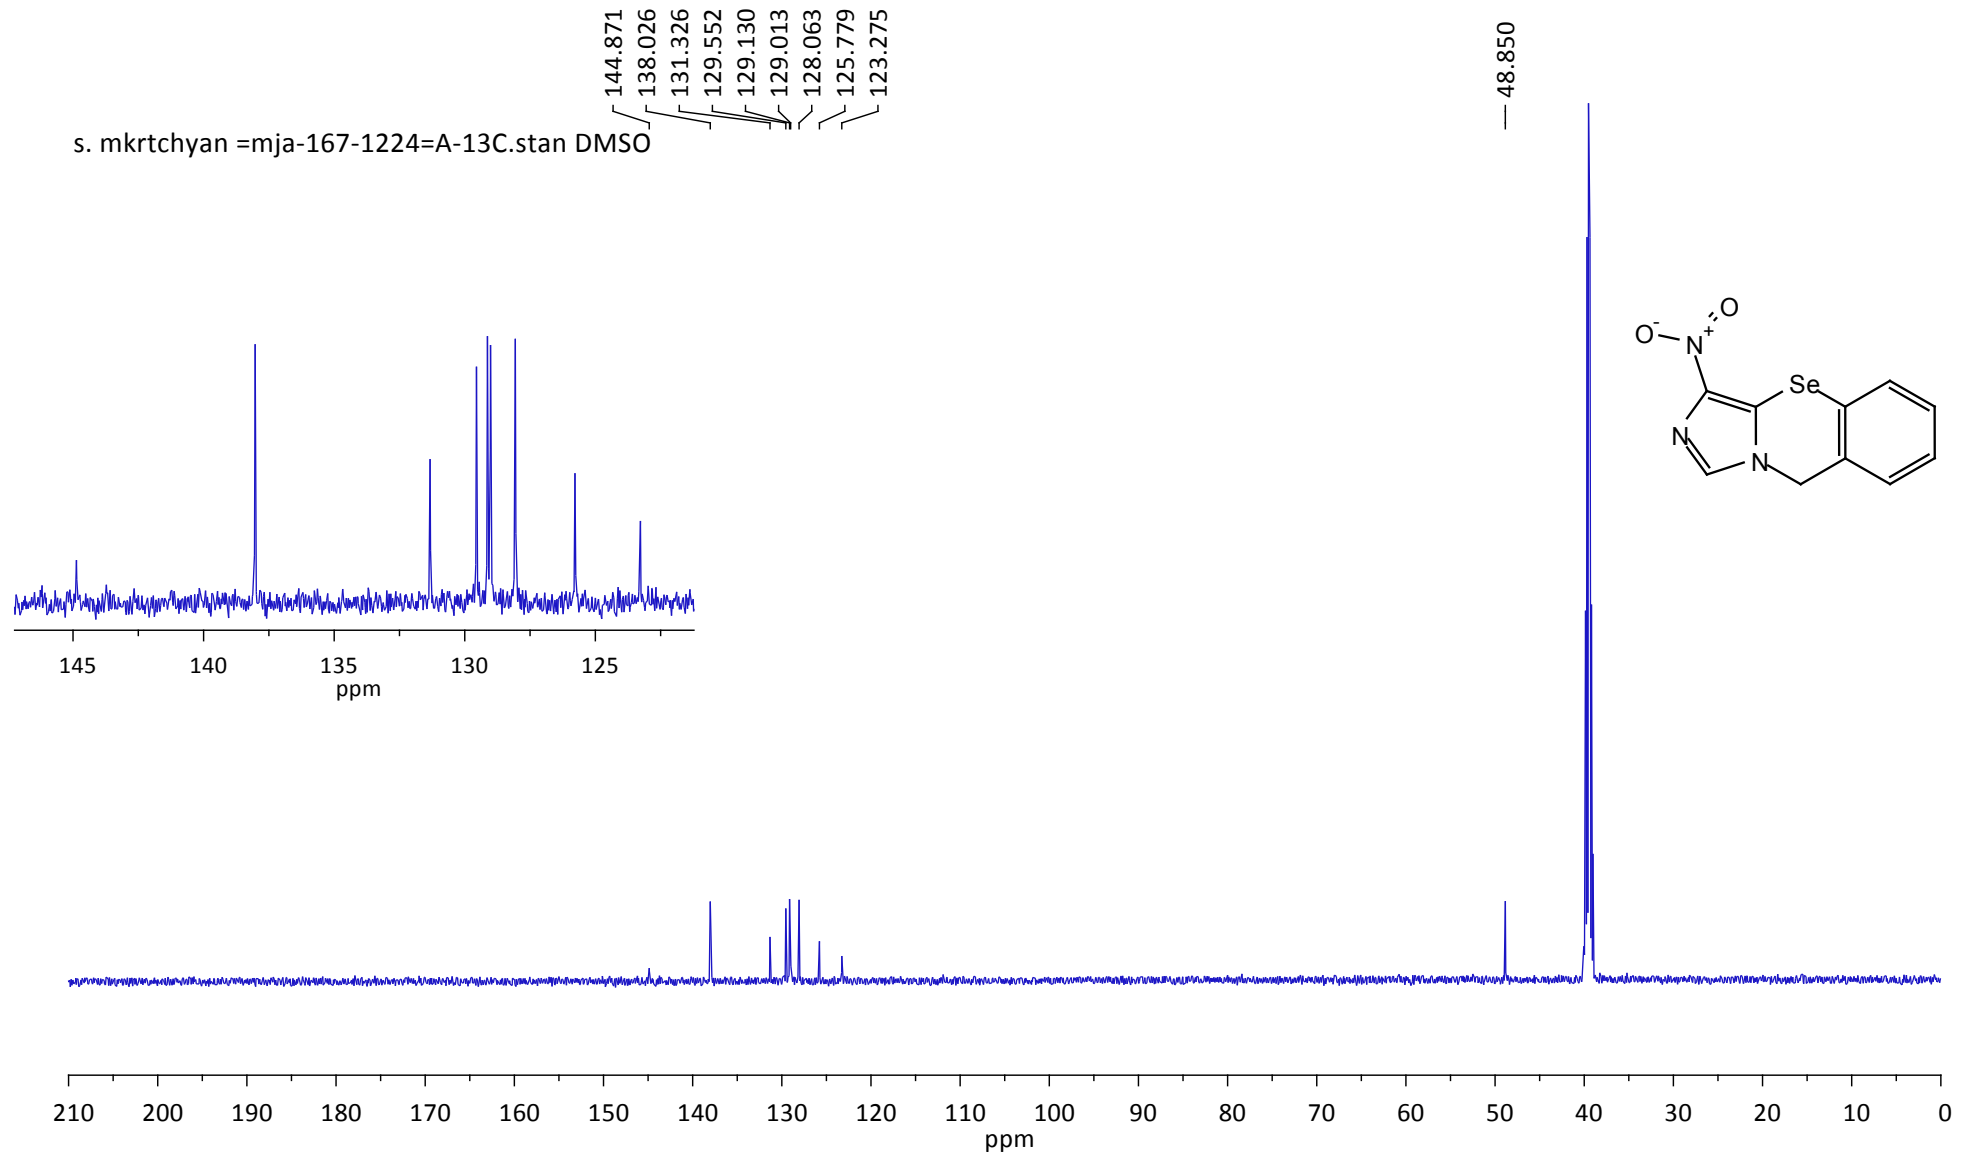

Comment s. mkrтчhуа =mja-167-1224=A-13C.stan DMSO  
Number of Scans 512  
Spectrometer Frequency 125.76  
Spectral Width 36057.7  
Spectral Size 65536

Compound **13c**

7.698  
7.463  
7.373  
7.327  
7.234  
7.229  
7.222

5.090

s. mkrtyan =mj-145-613=1H.stan CDCl3

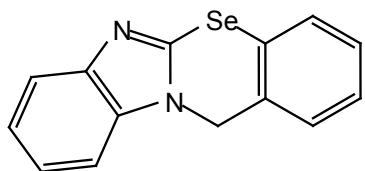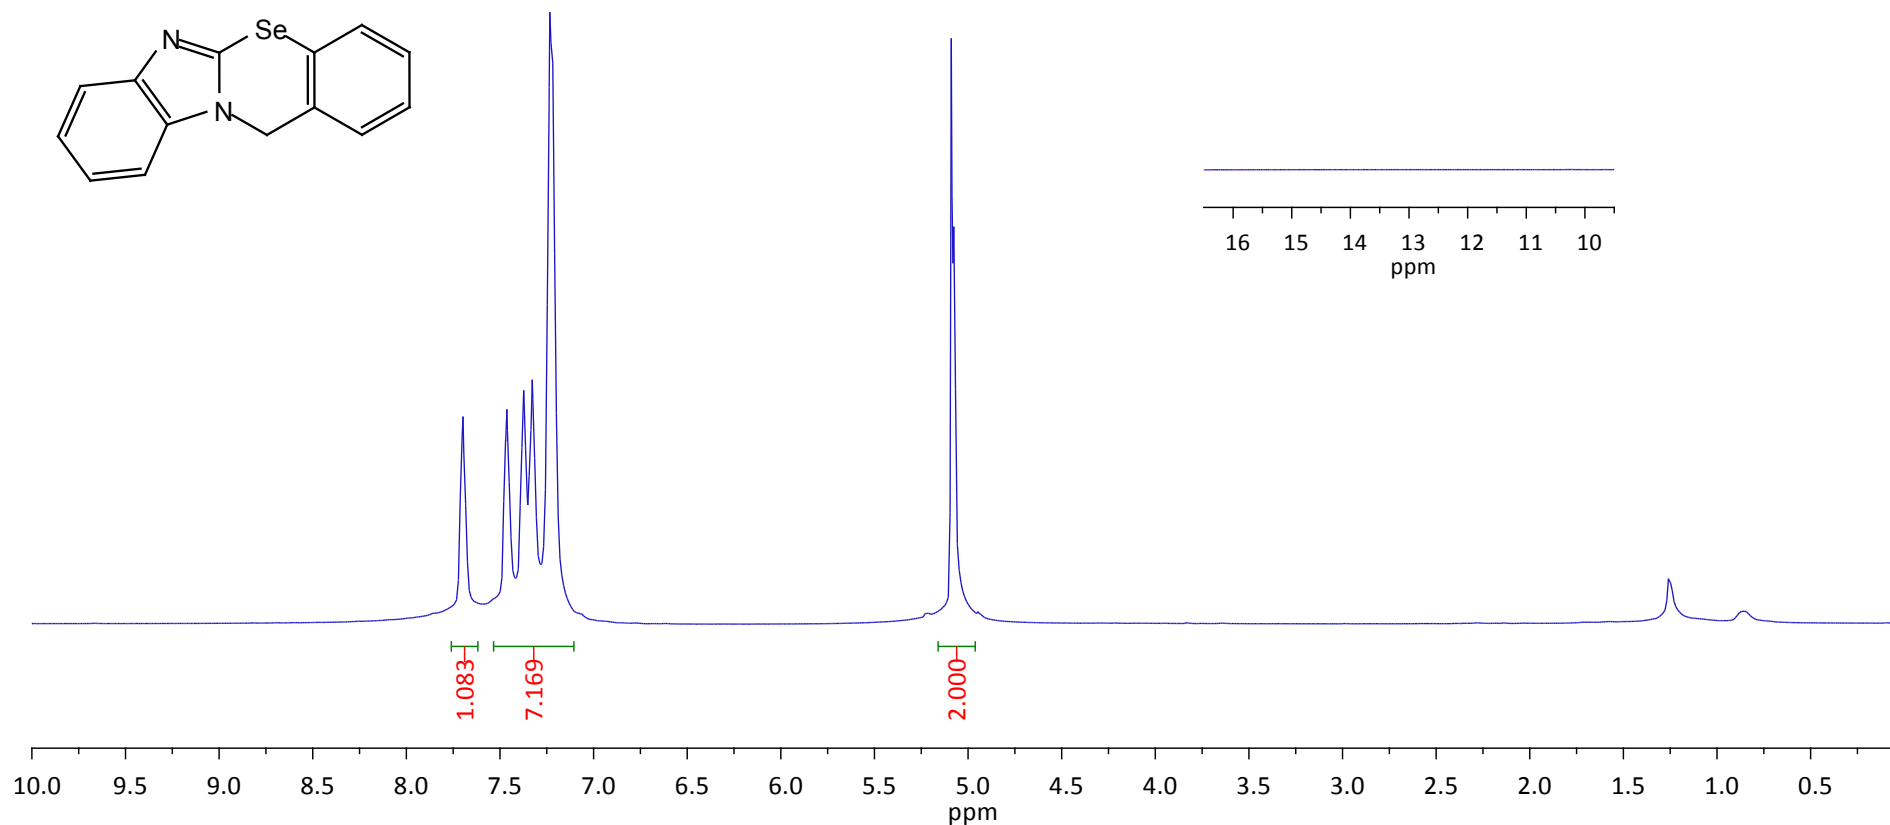

|                        |                                      |
|------------------------|--------------------------------------|
| Comment                | s. mkrtyan =mj-145-613=1H.stan CDCl3 |
| Number of Scans        | 24                                   |
| Spectrometer Frequency | 500.13                               |
| Spectral Width         | 12335.5                              |
| Spectral Size          | 65536                                |

Compound **13c**

144.446  
143.237  
131.965  
129.811  
128.820  
128.420  
127.468  
122.317  
122.100  
118.898

— 47.919

s. mkrtchyan =mj-145-613=A-13C.stan CDCl<sub>3</sub>

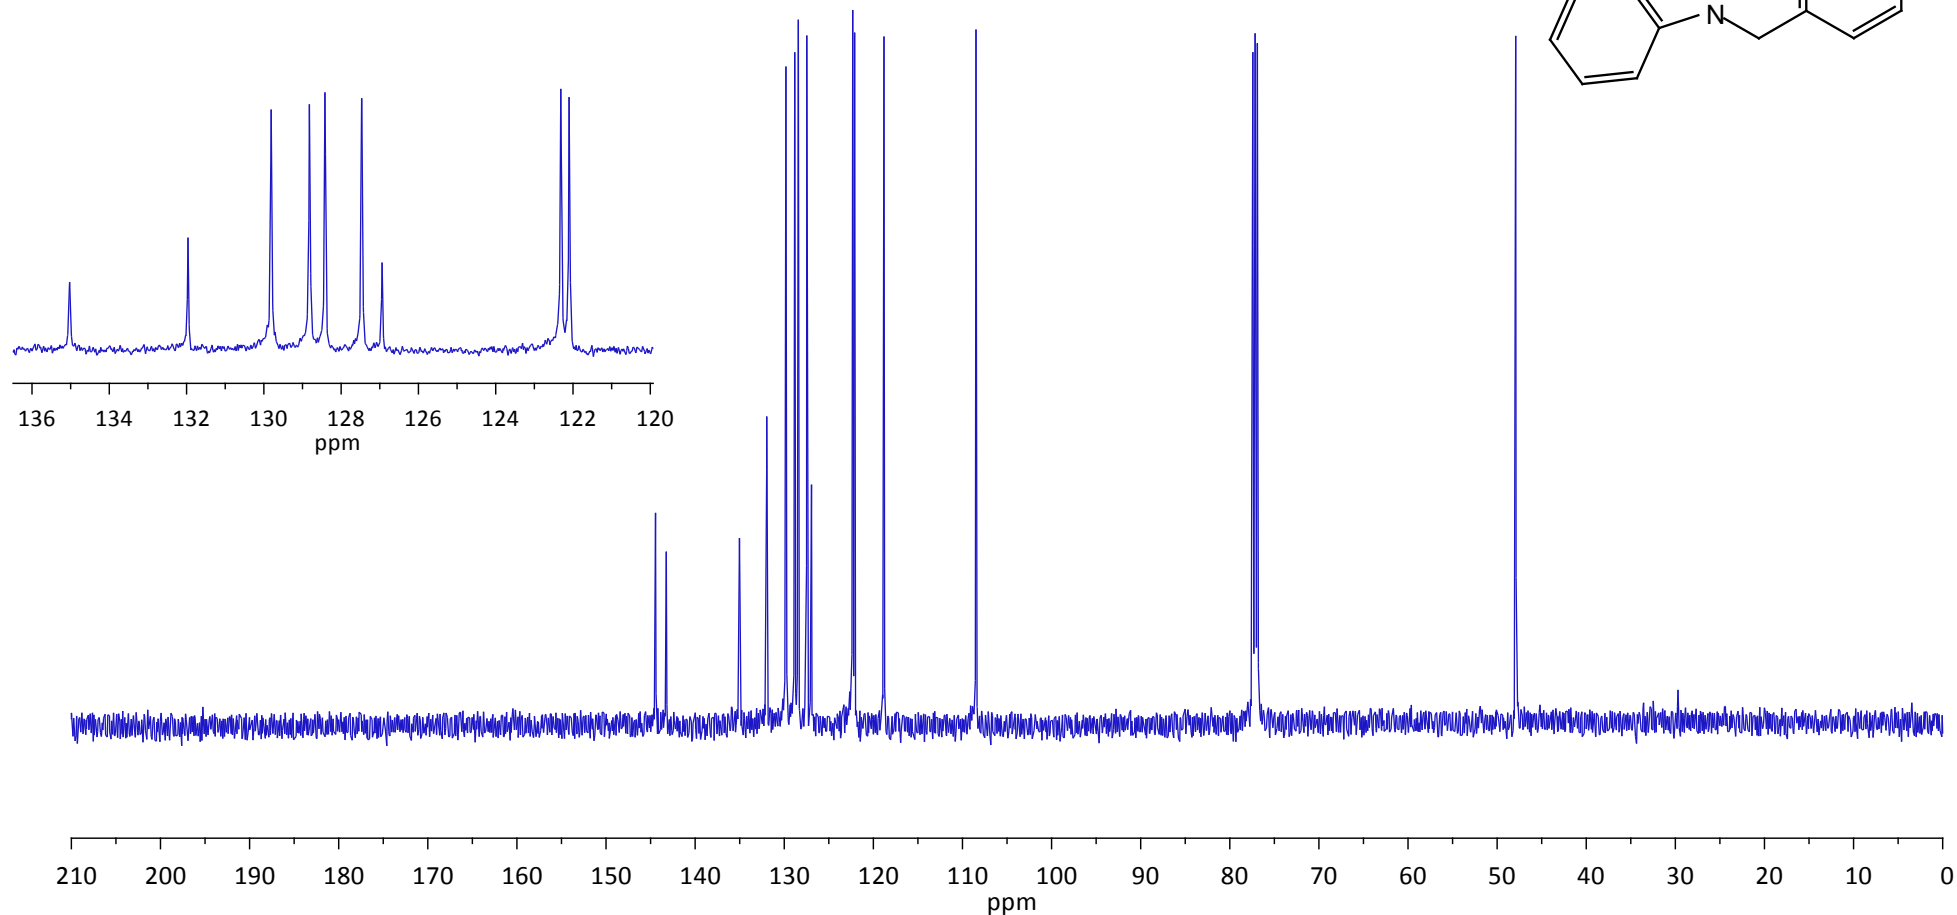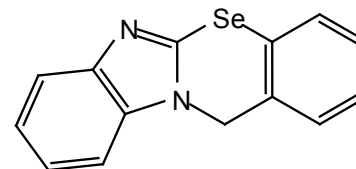

Comment s. mkrtchyan =mj-145-613=A-13C.stan CDCl<sub>3</sub>  
 Number of Scans 512  
 Spectrometer Frequency 125.76  
 Spectral Width 36057.7  
 Spectral Size 65536

Compound **1by**

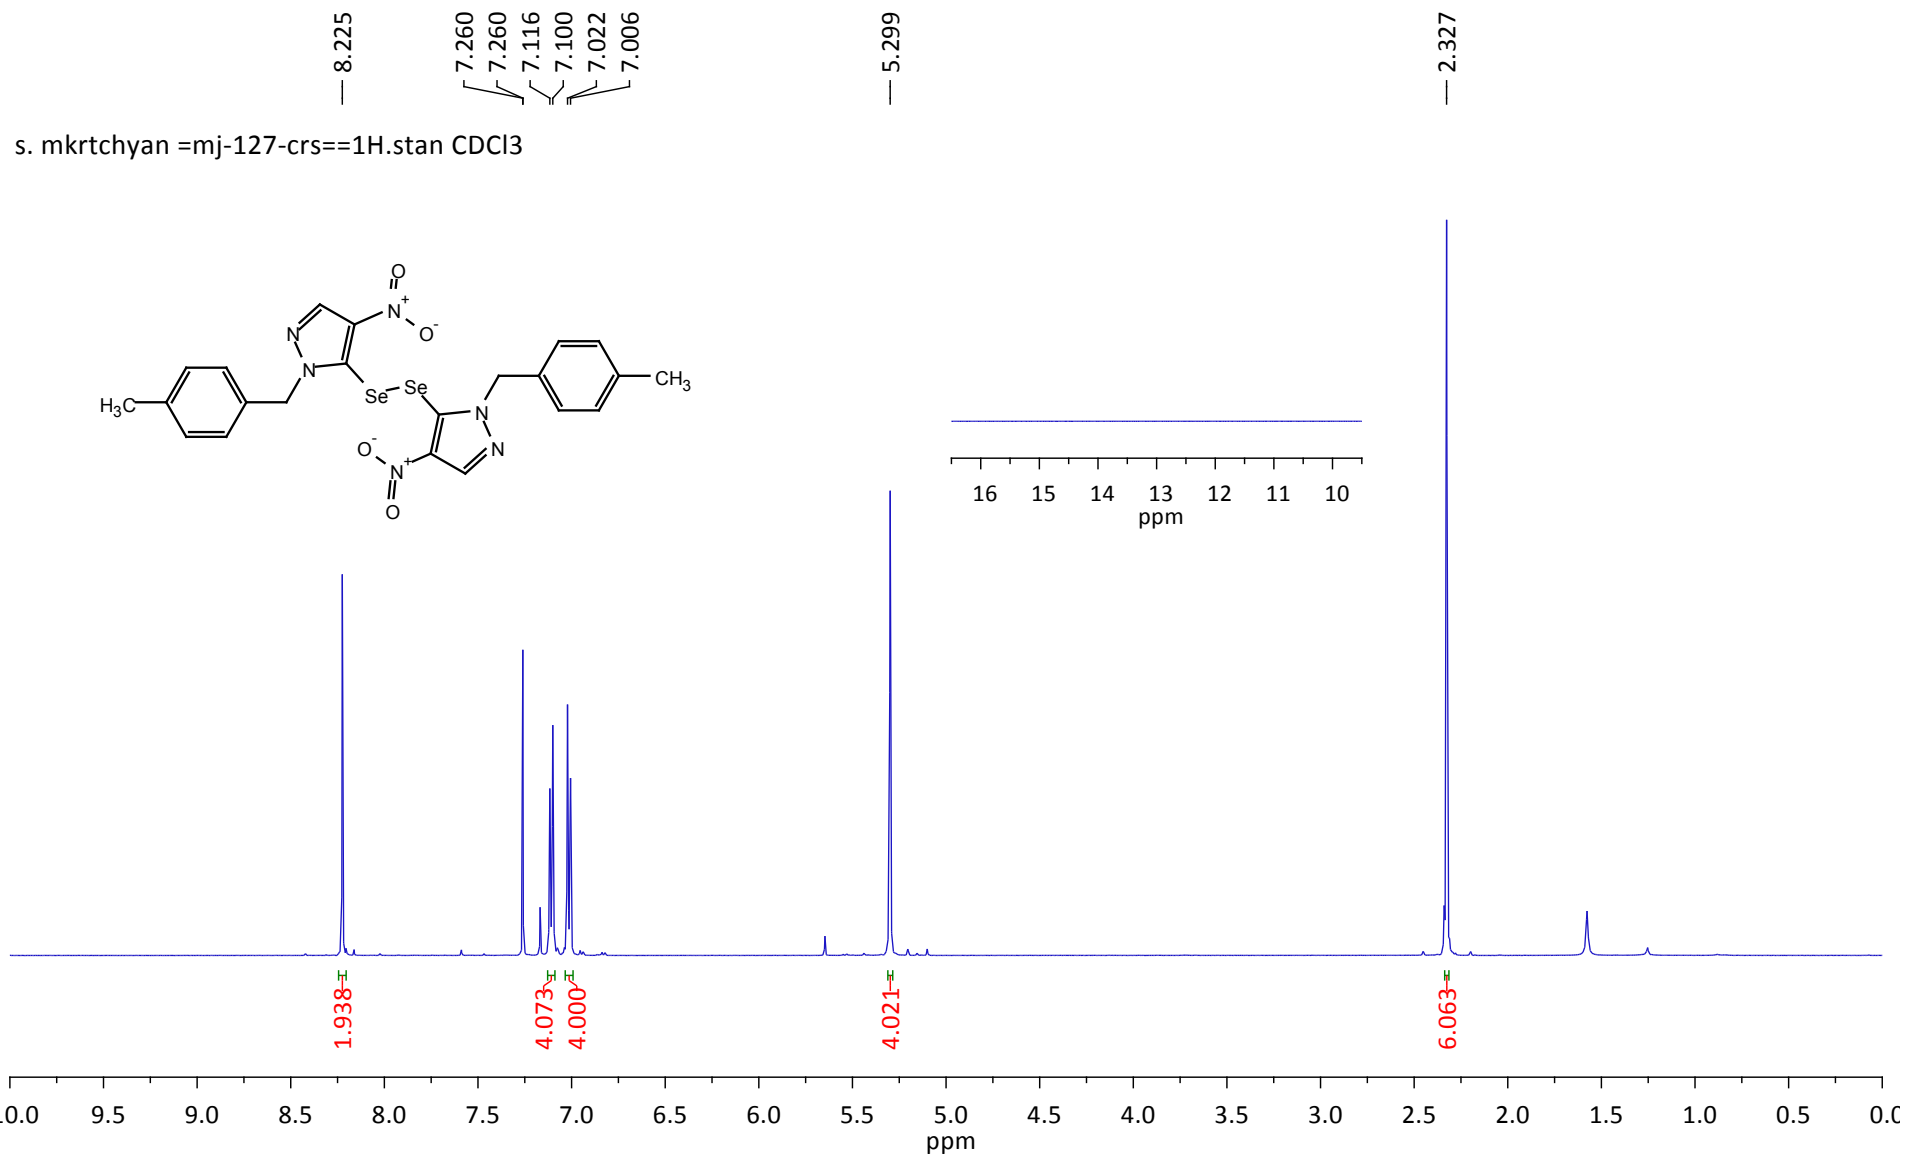

Comment s. mkrtyan =mj-127-crs==1H.stan CDCl3  
 Number of Scans 24  
 Spectrometer Frequency 500.13  
 Spectral Width 12335.5  
 Spectral Size 65536

Compound **1by**

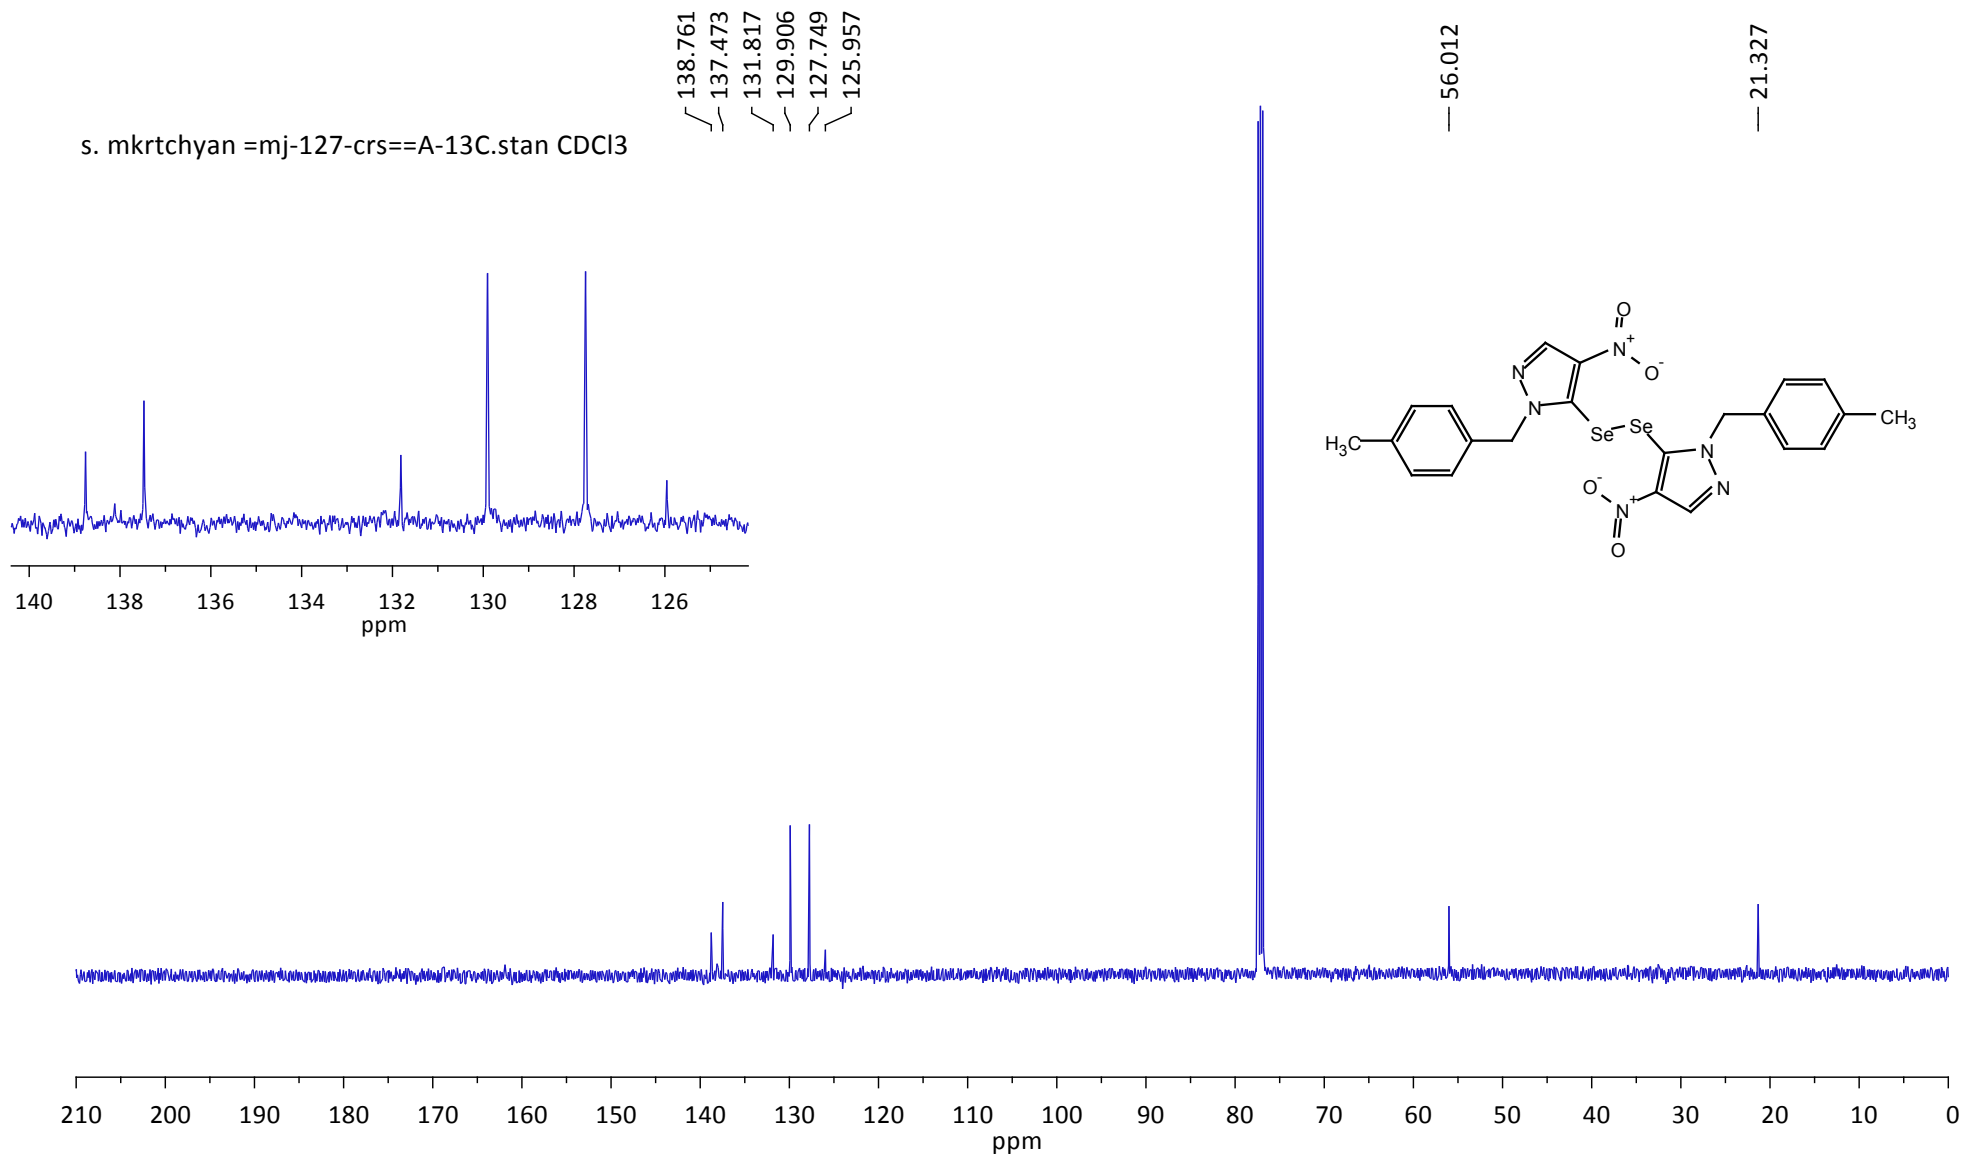

|                        |                                            |
|------------------------|--------------------------------------------|
| Comment                | s. mkrtchyan =mj-127-crs==A-13C.stan CDCl3 |
| Number of Scans        | 512                                        |
| Spectrometer Frequency | 125.76                                     |
| Spectral Width         | 36057.7                                    |
| Spectral Size          | 65536                                      |



## (D) X-ray single crystal analysis of compounds **1c**, **2f**, **5b**, **5d**, **5f**, **5i**, **5k** and **5m**.

CCDC 1922898-1922905 contain the supplementary crystallographic data for this paper. These data can be obtained free of charge from The Cambridge Crystallographic Data Centre *via* [www.ccdc.cam.ac.uk/structures](http://www.ccdc.cam.ac.uk/structures). Figures presenting molecular structures of all structurally determined compounds, tables containing crystals data and data refinement as well as details of X-ray diffraction experiments are given in SI file.

### X-ray diffraction experimental details

Data for single crystals suitable for diffraction experiments of the compounds **1c**, **2f**, **5b**, **5d**, **5f**, **5i**, **5k** and **5m** were collected at room temperature on a Gemini A Ultra Diffractometer (Rigaku Oxford Diffraction) with mirror monochromated Mo/K $\alpha$  radiation ( $\lambda = 0.71073 \text{ \AA}$ ). Data collection and data reduction were performed in the CrysAlisPro program [1]. The empirical absorption corrections using spherical harmonics implemented in multi-scan scaling algorithm were applied. To solve and refine the structure OLEX-2 version 1.2 [2] with incorporated SHELXT [3] (direct methods) and SHELXL (the full-matrix least-squares technique) programs [4] was used. All non-hydrogen atoms were refined with anisotropic temperature factors. The H-atoms were placed in calculated positions with fixed isotropic thermal parameters ( $U_{\text{iso}}(\text{H}) = 1.2 \times [U_{\text{eq}}(\text{C})]$  or  $1.5 \times [U_{\text{eq}}(\text{C})]$  for aromatic or aliphatic carbon atoms, respectively). In **1c** symptoms of disorder were detected. For the most influenced fragments i.e. seleno atom and nitro groups, two positions were considered with free occupancy factors that equalled to 0.79(2) for the major component at the final stage of the refinement. In **5d** the -CF<sub>3</sub> group showed rotational disorder and the final model contains two most probable position of the group with s.o.f. for major component refined to 0.624(14). Crystal data for the investigated compounds are collected in Tables S1a and S1b.

---

<sup>1</sup> CrysAlisPro 1.171.38.46, Rigaku Oxford Diffraction, 2015.

<sup>2</sup> O.V.Dolomanov, L.J. Bourhis, R.J. Gildea, J.A.K. Howard, H. Puschmann, J. Appl. Cryst. 2009, **42**, 339-341. OLEX2: A Complete Structure Solution, Refinement and Analysis Program. <http://dx.doi.org/10.1107/S0021889808042726>

<sup>3</sup> G. M. Sheldrick, Acta Cryst. 2015, A71, 3–8. SHELXT - Integrated space-group and crystal-structure determination. <https://doi.org/10.1107/S2053273314026370>

<sup>4</sup> G. M. Sheldrick, Acta Cryst. 2015, C71, 3–8. Crystal structure refinement with SHELXL. <https://doi.org/10.1107/S2053229614024218>

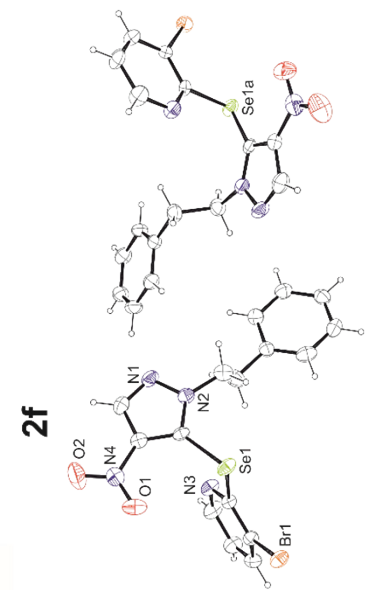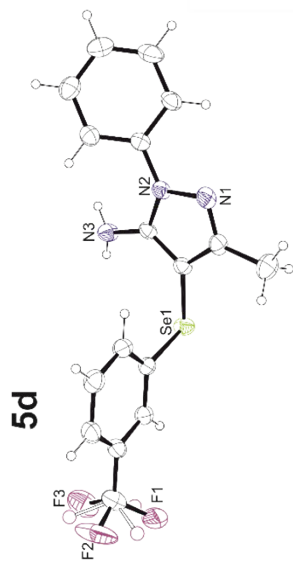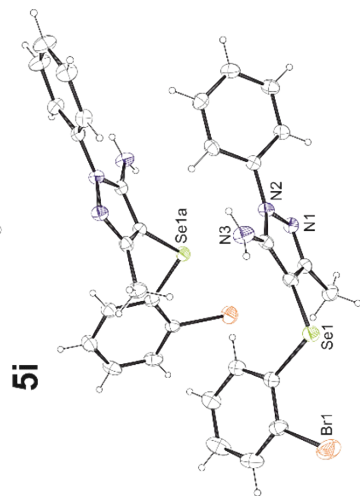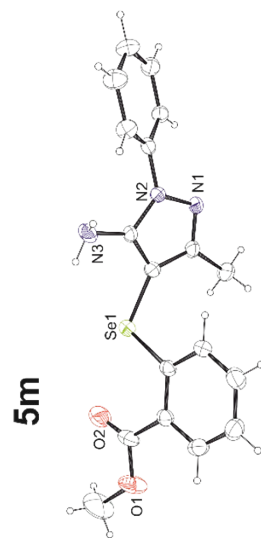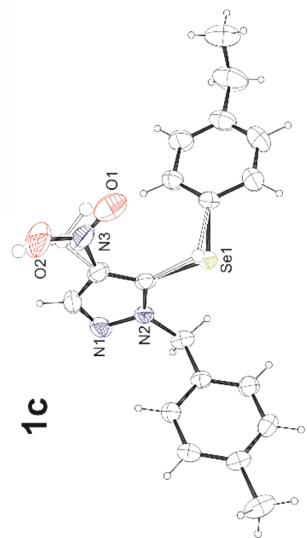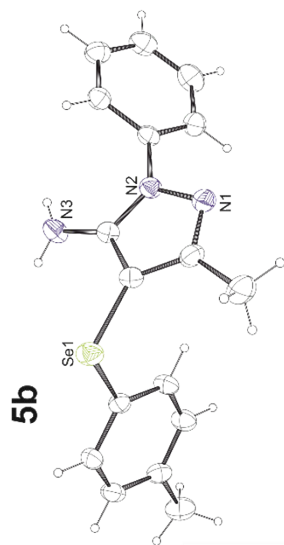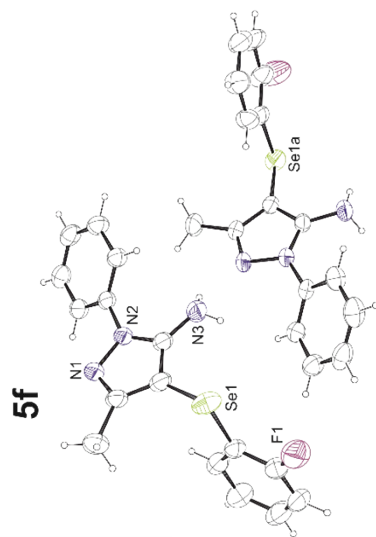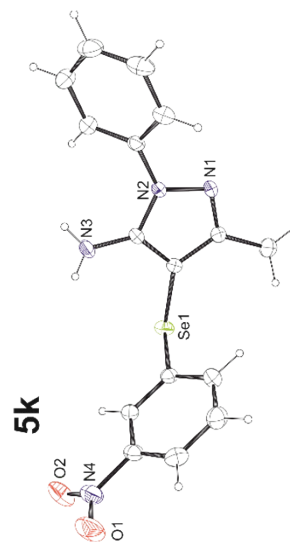

**Figure 1.** Ortep<sup>5</sup> drawings of molecular structures. The thermal ellipsoids are drawn with 30% probability. Only the labels for atoms heavier than carbon atom are given. In the cases where two crystallographically molecules were found the labels of the second molecule correspond to the first one and are given with suffix “a”. Minor components of disordered groups are depicted with spheres of arbitrary radius.

**Table S1a.** Crystal data and data refinement for **1c**, **2f**, **5b** and **5d**

| Compound                                                     | 1c                                                                | 2f                                                                  | 5b                                                                | 5d                                                                |
|--------------------------------------------------------------|-------------------------------------------------------------------|---------------------------------------------------------------------|-------------------------------------------------------------------|-------------------------------------------------------------------|
| CCDC number                                                  | 1922899                                                           | 1922903                                                             | 1922898                                                           | 1922905                                                           |
| Empirical formula                                            | C <sub>19</sub> H <sub>19</sub> N <sub>3</sub> O <sub>2</sub> Se  | C <sub>16</sub> H <sub>13</sub> BrN <sub>4</sub> O <sub>2</sub> Se  | C <sub>17</sub> H <sub>17</sub> N <sub>3</sub> Se                 | C <sub>17</sub> H <sub>14</sub> F <sub>3</sub> N <sub>3</sub> Se  |
| Formula weight                                               | 400.33                                                            | 452.17                                                              | 342.29                                                            | 396.27                                                            |
| Temperature/K                                                | 293(2)                                                            | 293(2)                                                              | 293(2)                                                            | 293(2)                                                            |
| Crystal system                                               | monoclinic                                                        | triclinic                                                           | monoclinic                                                        | monoclinic                                                        |
| Space group                                                  | <i>P</i> 2 <sub>1</sub> / <i>c</i>                                | <i>P</i> -1                                                         | <i>P</i> 2 <sub>1</sub> / <i>c</i>                                | <i>P</i> 2 <sub>1</sub> / <i>c</i>                                |
| <i>a</i> /Å                                                  | 4.8207(3)                                                         | 7.8948(5)                                                           | 12.5515(5)                                                        | 5.7537(2)                                                         |
| <i>b</i> /Å                                                  | 36.9783(15)                                                       | 7.9369(6)                                                           | 5.93199(19)                                                       | 23.2453(8)                                                        |
| <i>c</i> /Å                                                  | 10.4021(6)                                                        | 31.3002(16)                                                         | 21.5896(11)                                                       | 12.4112(5)                                                        |
| $\alpha$ /°                                                  | 90                                                                | 83.404(5)                                                           | 90                                                                | 90                                                                |
| $\beta$ /°                                                   | 95.860(6)                                                         | 89.627(5)                                                           | 101.138(4)                                                        | 90.937(4)                                                         |
| $\gamma$ /°                                                  | 90                                                                | 60.612(7)                                                           | 90                                                                | 90                                                                |
| Volume/Å <sup>3</sup>                                        | 1844.63(17)                                                       | 1694.8(2)                                                           | 1577.19(11)                                                       | 1659.73(10)                                                       |
| <i>Z</i>                                                     | 4                                                                 | 4                                                                   | 4                                                                 | 4                                                                 |
| $\rho_{\text{calc}}$ g/cm <sup>3</sup>                       | 1.442                                                             | 1.772                                                               | 1.442                                                             | 1.586                                                             |
| $\mu$ /mm <sup>-1</sup>                                      | 2.052                                                             | 4.590                                                               | 2.378                                                             | 2.296                                                             |
| <i>F</i> (000)                                               | 816.0                                                             | 888.0                                                               | 696.0                                                             | 792.0                                                             |
| Crystal size/mm <sup>3</sup>                                 | 0.35 × 0.08 × 0.05                                                | 0.5 × 0.3 × 0.3                                                     | 0.7 × 0.4 × 0.2                                                   | 0.8 × 0.2 × 0.2                                                   |
| Radiation                                                    | MoK $\alpha$ ( $\lambda$ = 0.71073 Å)                             |                                                                     |                                                                   |                                                                   |
| 2 $\theta$ range for data collection/°                       | 6.612 to 62.856                                                   | 6.562 to 62.636                                                     | 6.616 to 54.994                                                   | 6.566 to 50.992                                                   |
| Index ranges                                                 | -6 ≤ <i>h</i> ≤ 7,<br>-53 ≤ <i>k</i> ≤ 49,<br>-14 ≤ <i>l</i> ≤ 14 | -11 ≤ <i>h</i> ≤ 10,<br>-11 ≤ <i>k</i> ≤ 11,<br>-44 ≤ <i>l</i> ≤ 45 | -15 ≤ <i>h</i> ≤ 16,<br>-7 ≤ <i>k</i> ≤ 7,<br>-27 ≤ <i>l</i> ≤ 24 | -6 ≤ <i>h</i> ≤ 6,<br>-26 ≤ <i>k</i> ≤ 28,<br>-15 ≤ <i>l</i> ≤ 15 |
| Reflections collected                                        | 25566                                                             | 24857                                                               | 14178                                                             | 9856                                                              |
| Independent reflections                                      | 5610<br>[ <i>R</i> <sub>int</sub> = 0.0730]                       | 9838<br>[ <i>R</i> <sub>int</sub> = 0.0689]                         | 3579<br>[ <i>R</i> <sub>int</sub> = 0.0392]                       | 3036<br>[ <i>R</i> <sub>int</sub> = 0.0249]                       |
| Data/restraints/parameters                                   | 5610/21/266                                                       | 9838/0/433                                                          | 3579/2/200                                                        | 3036/103/254                                                      |
| Goodness-of-fit on <i>F</i> <sup>2</sup>                     | 1.001                                                             | 1.006                                                               | 1.020                                                             | 1.030                                                             |
| Final <i>R</i> indexes [ <i>I</i> > 2 $\sigma$ ( <i>I</i> )] | <i>R</i> <sub>1</sub> = 0.0516, <i>wR</i> <sub>2</sub> = 0.0916   | <i>R</i> <sub>1</sub> = 0.0604, <i>wR</i> <sub>2</sub> = 0.0631     | <i>R</i> <sub>1</sub> = 0.0365, <i>wR</i> <sub>2</sub> = 0.0731   | <i>R</i> <sub>1</sub> = 0.0304, <i>wR</i> <sub>2</sub> = 0.0670   |
| Final <i>R</i> indexes                                       | <i>R</i> <sub>1</sub> = 0.1563, <i>wR</i> <sub>2</sub> =          | <i>R</i> <sub>1</sub> = 0.1642, <i>wR</i> <sub>2</sub> =            | <i>R</i> <sub>1</sub> = 0.0596, <i>wR</i> <sub>2</sub> =          | <i>R</i> <sub>1</sub> = 0.0408, <i>wR</i> <sub>2</sub> =          |

<sup>5</sup> L. J. Farrugia, J. Appl. Cryst. 2012, 45, 849–854. WinGX and ORTEP for Windows: an update. <https://doi.org/10.1107/S0021889812029111>.

|                                                |            |            |            |            |
|------------------------------------------------|------------|------------|------------|------------|
| [all data]                                     | 0.1215     | 0.0860     | 0.0819     | 0.0711     |
| Largest diff. peak/hole<br>/ e Å <sup>-3</sup> | 0.28/-0.20 | 0.68/-0.56 | 0.37/-0.26 | 0.39/-0.38 |

**Table S1a.** Crystal data and data refinement for **5f**, **5i**, **5k** and **5m**

| Compound                                                        | 5f                                                                  | 5i                                                                  | 5k                                                                  | 5m                                                                 |
|-----------------------------------------------------------------|---------------------------------------------------------------------|---------------------------------------------------------------------|---------------------------------------------------------------------|--------------------------------------------------------------------|
| CCDC number                                                     | 1922901                                                             | 1922902                                                             | 1922900                                                             | 1922904                                                            |
| Empirical formula                                               | C <sub>16</sub> H <sub>14</sub> FN <sub>3</sub> Se                  | C <sub>16</sub> H <sub>14</sub> BrN <sub>3</sub> Se                 | C <sub>16</sub> H <sub>14</sub> N <sub>4</sub> O <sub>2</sub> Se    | C <sub>18</sub> H <sub>17</sub> N <sub>3</sub> O <sub>2</sub> Se   |
| Formula weight                                                  | 346.26                                                              | 407.17                                                              | 373.27                                                              | 386.30                                                             |
| Temperature/K                                                   | 293(2)                                                              | 293(2)                                                              | 293(2)                                                              | 293(2)                                                             |
| Crystal system                                                  | triclinic                                                           | monoclinic                                                          | monoclinic                                                          | orthorhombic                                                       |
| Space group                                                     | <i>P</i> -1                                                         | <i>P</i> 2 <sub>1</sub> / <i>c</i>                                  | <i>P</i> 2 <sub>1</sub> / <i>n</i>                                  | <i>Pbca</i>                                                        |
| <i>a</i> /Å                                                     | 10.7344(4)                                                          | 9.4439(4)                                                           | 8.0441(3)                                                           | 12.6478(10)                                                        |
| <i>b</i> /Å                                                     | 11.4734(4)                                                          | 26.1410(11)                                                         | 16.3997(6)                                                          | 10.1017(8)                                                         |
| <i>c</i> /Å                                                     | 13.5667(5)                                                          | 12.8829(4)                                                          | 12.5446(5)                                                          | 26.833(3)                                                          |
| $\alpha$ /°                                                     | 92.850(3)                                                           | 90                                                                  | 90                                                                  | 90                                                                 |
| $\beta$ /°                                                      | 109.342(3)                                                          | 91.719(3)                                                           | 106.994(4)                                                          | 90                                                                 |
| $\gamma$ /°                                                     | 97.713(3)                                                           | 90                                                                  | 90                                                                  | 90                                                                 |
| Volume/Å <sup>3</sup>                                           | 1554.36(10)                                                         | 3179.0(2)                                                           | 1582.61(10)                                                         | 3428.2(5)                                                          |
| Z                                                               | 4                                                                   | 8                                                                   | 4                                                                   | 8                                                                  |
| $\rho_{\text{calc}}$ g/cm <sup>3</sup>                          | 1.480                                                               | 1.701                                                               | 1.567                                                               | 1.497                                                              |
| $\mu$ /mm <sup>-1</sup>                                         | 2.422                                                               | 4.872                                                               | 2.387                                                               | 2.206                                                              |
| F(000)                                                          | 696.0                                                               | 1600.0                                                              | 752.0                                                               | 1568.0                                                             |
| Crystal size/mm <sup>3</sup>                                    | 0.42 × 0.36 × 0.28                                                  | 0.4 × 0.1 × 0.1                                                     | 0.8 × 0.6 × 0.4                                                     | 0.28 × 0.26 × 0.08                                                 |
| Radiation                                                       | MoK $\alpha$ ( $\lambda$ = 0.71073 Å)                               |                                                                     |                                                                     |                                                                    |
| 2 $\theta$ range for data collection/°                          | 7.02 to 53.994                                                      | 6.518 to 52.998                                                     | 6.792 to 56.484                                                     | 6.442 to 62.878                                                    |
| Index ranges                                                    | -13 ≤ <i>h</i> ≤ 13,<br>-14 ≤ <i>k</i> ≤ 14,<br>-17 ≤ <i>l</i> ≤ 17 | -11 ≤ <i>h</i> ≤ 11,<br>-32 ≤ <i>k</i> ≤ 32,<br>-16 ≤ <i>l</i> ≤ 16 | -10 ≤ <i>h</i> ≤ 10,<br>-21 ≤ <i>k</i> ≤ 21,<br>-16 ≤ <i>l</i> ≤ 16 | -17 ≤ <i>h</i> ≤ 17,<br>-9 ≤ <i>k</i> ≤ 14,<br>-28 ≤ <i>l</i> ≤ 36 |
| Reflections collected                                           | 35398                                                               | 33276                                                               | 29384                                                               | 24626                                                              |
| Independent reflections                                         | 6775<br>[ <i>R</i> <sub>int</sub> = 0.0432]                         | 6587<br>[ <i>R</i> <sub>int</sub> = 0.0735]                         | 3906<br>[ <i>R</i> <sub>int</sub> = 0.0377]                         | 5243<br>[ <i>R</i> <sub>int</sub> = 0.1042]                        |
| Data/restraints/<br>parameters                                  | 6775/4/397                                                          | 6587/4/397                                                          | 3906/2/217                                                          | 5243/0/220                                                         |
| Goodness-of-fit on <i>F</i> <sup>2</sup>                        | 1.014                                                               | 1.020                                                               | 1.059                                                               | 0.982                                                              |
| Final <i>R</i> indexes<br>[ <i>I</i> > 2 $\sigma$ ( <i>I</i> )] | <i>R</i> <sub>1</sub> = 0.0407, <i>wR</i> <sub>2</sub> =<br>0.0773  | <i>R</i> <sub>1</sub> = 0.0403, <i>wR</i> <sub>2</sub> =<br>0.0647  | <i>R</i> <sub>1</sub> = 0.0262, <i>wR</i> <sub>2</sub> =<br>0.0636  | <i>R</i> <sub>1</sub> = 0.0537, <i>wR</i> <sub>2</sub> =<br>0.0992 |
| Final <i>R</i> indexes                                          | <i>R</i> <sub>1</sub> = 0.0830, <i>wR</i> <sub>2</sub> =            | <i>R</i> <sub>1</sub> = 0.0859, <i>wR</i> <sub>2</sub> =            | <i>R</i> <sub>1</sub> = 0.0336, <i>wR</i> <sub>2</sub> =            | <i>R</i> <sub>1</sub> = 0.1656, <i>wR</i> <sub>2</sub> =           |

|                                                |            |            |            |            |
|------------------------------------------------|------------|------------|------------|------------|
| [all data]                                     | 0.0932     | 0.0772     | = 0.0669   | 0.1373     |
| Largest diff.<br>peak/hole / e Å <sup>-3</sup> | 0.59/-0.51 | 0.42/-0.61 | 0.26/-0.32 | 0.65/-0.71 |
